# Supplementary material
Source: PubMed Central journal article supplement (PMC4235575)
Supplement: supp_gau075_gau075supp_tables.pdf [file supp_gau075_gau075supp_tables.pdf]

**Supplementary Table I.** List of 92 genes differentially expressed (from two microarrays) by at least 1.5-fold in R1881-stimulated REP cells versus vehicle control REP cells.

| Gene Symbol         | Gene Name                                                   | REP<br>(R1881 vs Control)             |                           | Fold Change | P-value |
|---------------------|-------------------------------------------------------------|---------------------------------------|---------------------------|-------------|---------|
|                     |                                                             | Up- or down-<br>regulated by<br>R1881 | Comparison<br>1 Log ratio |             |         |
| MAGEB18             | melanoma antigen family B, 18                               | Up                                    | 1.94                      | 3.84        | 0.0078  |
| ASB14               | ankyrin repeat and SOCS box containing 14                   | Up                                    | 1.92                      | 3.79        | 0.0031  |
| FAM138E             | family with sequence similarity 138, member E               | Up                                    | 1.82                      | 3.54        | 0.0046  |
| C17orf102           | chromosome 17 open reading frame 102                        | Up                                    | 1.76                      | 3.38        | 0.0047  |
| FAM149B1            | family with sequence similarity 149, member B1              | Up                                    | 1.60                      | 3.04        | 0.0001  |
| QRFP                | pyroglutamylated RFamide peptide                            | Up                                    | 1.51                      | 2.86        | 0.0066  |
| PAR5                | Prader-Willi/Angelman syndrome-5                            | Up                                    | 1.47                      | 2.78        | 0.0032  |
| TBX4                | T-box 4                                                     | Up                                    | 1.42                      | 2.68        | 0.0097  |
| GPR27               | G protein-coupled receptor 27                               | Up                                    | 1.40                      | 2.64        | 0.0087  |
| LOC100506533        | putative uncharacterized protein FLJ35883-like              | Up                                    | 1.36                      | 2.56        | 0.0098  |
| OR2L2               | olfactory receptor, family 2, subfamily L, member 2         | Up                                    | 1.35                      | 2.54        | 0.0084  |
| CLEC12B             | C-type lectin domain family 12, member B                    | Up                                    | 1.33                      | 2.52        | 0.0093  |
| SCEL                | sciellin                                                    | Up                                    | 1.25                      | 2.38        | 0.0049  |
| LOC646736           | hypothetical LOC646736                                      | Up                                    | 1.25                      | 2.38        | 0.0079  |
| NCRNA00099          | non-protein coding RNA 99                                   | Up                                    | 1.24                      | 2.36        | 0.0008  |
| ARHGAP6             | Rho GTPase activating protein 6                             | Up                                    | 1.23                      | 2.34        | 0.0093  |
| LOC283028           | hypothetical protein LOC283028                              | Up                                    | 1.20                      | 2.30        | 0.0063  |
| ADARB2              | adenosine deaminase, RNA-specific, B2                       | Up                                    | 1.14                      | 2.20        | 0.0059  |
| OR10W1              | olfactory receptor, family 10, subfamily W, member 1        | Up                                    | 1.11                      | 2.17        | 0.0025  |
| PTPN7               | protein tyrosine phosphatase, non-receptor type 7           | Up                                    | 1.05                      | 2.07        | 0.0010  |
| FAM124B             | family with sequence similarity 124B                        | Up                                    | 1.03                      | 2.05        | 0.0034  |
| SORCS3              | sortilin-related VPS10 domain containing receptor 3         | Up                                    | 0.94                      | 1.92        | 0.0015  |
| FLJ37786            | hypothetical LOC642691                                      | Up                                    | 0.94                      | 1.91        | 0.0032  |
| C20orf26            | chromosome 20 open reading frame 26                         | Up                                    | 0.93                      | 1.91        | 0.0018  |
| LIMS3-<br>LOC440895 | LIMS3-LOC440895 readthrough                                 | Up                                    | 0.91                      | 1.88        | 0.0008  |
| PCDHA4              | protocadherin alpha 4                                       | Up                                    | 0.86                      | 1.82        | 0.0028  |
| CRIP1               | cysteine-rich protein 1 (intestinal)                        | Up                                    | 0.86                      | 1.81        | 0.0013  |
| CRYBA4              | crystallin, beta A4                                         | Up                                    | 0.84                      | 1.79        | 0.0072  |
| MRGPRX4             | MAS-related GPR, member X4                                  | Up                                    | 0.84                      | 1.79        | 0.0079  |
| RAP1GAP             | RAP1 GTPase activating protein                              | Up                                    | 0.74                      | 1.67        | 0.0065  |
| SLC25A48            | solute carrier family 25, member 48                         | Up                                    | 0.73                      | 1.66        | 0.0001  |
| PLAC4               | placenta-specific 4                                         | Up                                    | 0.73                      | 1.66        | 0.0049  |
| PCDHB17             | protocadherin beta 17 pseudogene                            | Up                                    | 0.73                      | 1.66        | 0.0021  |
| OR4K14              | olfactory receptor, family 4, subfamily K, member 14        | Up                                    | 0.68                      | 1.61        | 0.0032  |
| GPR31               | G protein-coupled receptor 31                               | Up                                    | 0.67                      | 1.59        | 0.0051  |
| ANGPT2              | angiopoietin 2                                              | Up                                    | 0.67                      | 1.59        | 0.0014  |
| ZNF408              | zinc finger protein 408                                     | Up                                    | 0.66                      | 1.58        | 0.0053  |
| C22orf34            | chromosome 22 open reading frame 34                         | Up                                    | 0.66                      | 1.58        | 0.0059  |
| CAMKK1              | calcium/calmodulin-dependent protein kinase kinase 1, alpha | Up                                    | 0.65                      | 1.57        | 0.0010  |
| LOC100131821        | hypothetical protein LOC100131821                           | Up                                    | 0.64                      | 1.56        | 0.0066  |
| LOC100129027        | hypothetical LOC100129027                                   | Up                                    | 0.63                      | 1.55        | 0.0010  |
| MANSC4              | MANSC domain containing 4                                   | Up                                    | 0.63                      | 1.55        | 0.0033  |
| RBMXL2              | RNA binding motif protein, X-linked-like 2                  | Up                                    | 0.60                      | 1.51        | 0.0060  |
| ANGPT4              | angiopoietin 4                                              | Up                                    | 0.59                      | 1.50        | 0.0082  |
| HTRA3               | HtrA serine peptidase 3                                     | Up                                    | 0.56                      | 1.48        | 0.0086  |
| RAB19               | RAB19, member RAS oncogene family                           | Up                                    | 0.55                      | 1.46        | 0.0050  |
| ERN1                | endoplasmic reticulum to nucleus signaling 1                | Up                                    | 0.54                      | 1.46        | 0.0043  |
| LOC100508613        | putative uncharacterized protein FLJ45035-like              | Down                                  | -0.57                     | 1.49        | 0.0083  |
| CCDC113             | coiled-coil domain containing 113                           | Down                                  | -0.58                     | 1.49        | 0.0064  |
| IgL5                | immunoglobulin lambda-like polypeptide 5                    | Down                                  | -0.61                     | 1.53        | 0.0038  |

|              |                                                                            |      |       |      |        |
|--------------|----------------------------------------------------------------------------|------|-------|------|--------|
| CYP24A1      | cytochrome P450, family 24, subfamily A, polypeptide 1                     | Down | -0.62 | 1.53 | 0.0075 |
| LOC339988    | hypothetical LOC339988                                                     | Down | -0.65 | 1.57 | 0.0056 |
| AFF3         | AF4/FMR2 family, member 3                                                  | Down | -0.66 | 1.58 | 0.0075 |
| KIAA1456     | KIAA1456                                                                   | Down | -0.73 | 1.66 | 0.0065 |
| LOC145837    | hypothetical LOC145837                                                     | Down | -0.75 | 1.68 | 0.0091 |
| CRX          | cone-rod homeobox                                                          | Down | -0.75 | 1.68 | 0.0014 |
| LOC100131878 | hypothetical protein LOC100131878                                          | Down | -0.78 | 1.72 | 0.0037 |
| CLCA2        | chloride channel accessory 2                                               | Down | -0.80 | 1.74 | 0.0085 |
| FXYD3        | FXYD domain containing ion transport regulator 3                           | Down | -0.83 | 1.78 | 0.0074 |
| LOC100499183 | hypothetical LOC100499183                                                  | Down | -0.84 | 1.79 | 0.0079 |
| CD247        | CD247 molecule                                                             | Down | -0.92 | 1.89 | 0.0033 |
| CCDC147      | coiled-coil domain containing 147                                          | Down | -0.94 | 1.92 | 0.0071 |
| PITPNC1      | phosphatidylinositol transfer protein, cytoplasmic 1                       | Down | -0.94 | 1.92 | 0.0026 |
| LOC100130954 | hypothetical LOC100130954                                                  | Down | -0.95 | 1.93 | 0.0072 |
| ANKRD56      | ankyrin repeat domain 56                                                   | Down | -0.97 | 1.95 | 0.0043 |
| LRRC43       | leucine rich repeat containing 43                                          | Down | -1.00 | 2.00 | 0.0097 |
| LEPR         | leptin receptor                                                            | Down | -1.02 | 2.03 | 0.0010 |
| TMEM74       | transmembrane protein 74                                                   | Down | -1.03 | 2.04 | 0.0073 |
| TTL9         | tubulin tyrosine ligase-like family, member 9                              | Down | -1.06 | 2.08 | 0.0050 |
| LOC100131826 | TSSP3028                                                                   | Down | -1.07 | 2.09 | 0.0027 |
| IL16         | interleukin 16                                                             | Down | -1.07 | 2.10 | 0.0063 |
| FAM75A3      | family with sequence similarity 75, member A3                              | Down | -1.08 | 2.11 | 0.0022 |
| LOC284009    | hypothetical LOC284009                                                     | Down | -1.13 | 2.18 | 0.0045 |
| AKAP14       | A kinase (PRKA) anchor protein 14                                          | Down | -1.15 | 2.22 | 0.0068 |
| FAM84A       | family with sequence similarity 84, member A                               | Down | -1.21 | 2.31 | 0.0029 |
| ALS2CR11     | amyotrophic lateral sclerosis 2 (juvenile) chromosome region, candidate 11 | Down | -1.24 | 2.36 | 0.0064 |
| C1orf159     | chromosome 1 open reading frame 159                                        | Down | -1.27 | 2.41 | 0.0084 |
| POF1B        | premature ovarian failure, 1B                                              | Down | -1.30 | 2.47 | 0.0025 |
| SYCP2        | synaptonemal complex protein 2                                             | Down | -1.30 | 2.47 | 0.0042 |
| KIF1A        | kinesin family member 1A                                                   | Down | -1.32 | 2.50 | 0.0044 |
| PCDHGA5      | protocadherin gamma subfamily A, 5                                         | Down | -1.53 | 2.89 | 0.0054 |
| BCOR         | BCL6 corepressor                                                           | Down | -1.58 | 2.99 | 0.0047 |
| GRK5         | G protein-coupled receptor kinase 5                                        | Down | -1.81 | 3.51 | 0.0088 |
| LOC100131496 | hypothetical LOC100131496                                                  | Down | -1.88 | 3.67 | 0.0033 |
| PROX2        | prospero homeobox 2                                                        | Down | -1.88 | 3.68 | 0.0048 |
| FLG          | filaggrin                                                                  | Down | -1.91 | 3.76 | 0.0012 |
| LOC100506253 | hypothetical LOC100506253                                                  | Down | -2.00 | 3.99 | 0.0088 |
| MRAP2        | melanocortin 2 receptor accessory protein 2                                | Down | -2.08 | 4.22 | 0.0013 |
| TRIM29       | tripartite motif containing 29                                             | Down | -2.20 | 4.60 | 0.0029 |
| PCDHB9       | protocadherin beta 9                                                       | Down | -2.67 | 6.37 | 0.0047 |
| OR1E1        | olfactory receptor, family 1, subfamily E, member 1                        | Down | -2.80 | 6.99 | 0.0096 |
| KRTAP1-5     | keratin associated protein 1-5                                             | Down | -3.32 | 9.95 | 0.0069 |

| <b>Gene Target</b>                                                            | <b>Forward primer</b>                  | <b>Reverse Primer</b>                   |
|-------------------------------------------------------------------------------|----------------------------------------|-----------------------------------------|
| Paired box 2 (PAX2)                                                           | 5'-CCC AGC GTC TCT TCC<br>ATC AA-3'    | 5'-CGT GCT GGG AAC AAT<br>GGT GT-3'     |
| Transient receptor potential cation channel,<br>subfamily V, member 4 (TRPV4) | 5'-CTA CGG CAC CTA TCG<br>TCA CC-3'    | 5'-TTA GGC GTT TCT GGG<br>TCA-3'        |
| Carbonic anhydrase IX (CA9)                                                   | 5'-CTG TCT CGC TTG GAA<br>GAA ATC G-3' | 5'-GCA GGA GTG CAG ATA<br>TGT CCA G-3'  |
| Pre-B-Cell Leukemia Homeobox 1 (PBX1)                                         | 5'-GAC AAC TCA GTG GAG<br>CAT TCA-3'   | 5'-CTC TCG CAG GAG ATT<br>CAT CAC-3'    |
| Solute Carrier Family 26 (Anion Exchanger),<br>Member 6 (SLC26A6)             | 5'-CGG AGG CGA GAC TAC<br>CAC A-3'     | 5'-ACC AAA ACC GGG AGG<br>TGT TG-3'     |
| Solute Carrier Family 26 (Anion Exchanger),<br>Member 11 (SLC26A11)           | 5'-CCC ACC GCC ATT ATG<br>TCC C-3'     | 5'-GCA GGT TCT TGA TCT<br>GTC CAA AG-3' |
| Beta-2-microglobulin (B2M)                                                    | 5'-CTC TCT CTT TCT GGC<br>CTG GAG-3'   | 5'-TCT GCT GGA TGA CGT<br>GAG TA-3'     |

**Supplementary Table II:** Primers used for Quantitative RT-PCR (qRT-PCR) Analysis.

| <b>Cell</b>                                                  | <b>GEO Accession Number</b> |
|--------------------------------------------------------------|-----------------------------|
| FibroP (normal fibroblast from patients with Parkinson's)    | GSE30227                    |
| GM12878 (lymphoblastoid)                                     | GSE30227                    |
| K652 (human myeloid leukemia cell line)                      | GSE30227                    |
| HepG2 (liver carcinoma)                                      | GSE30227                    |
| HUVEC (human umbilical vein endothelial cell)                | GSE30227                    |
| HEE (primary human immature epididymis epithelial cell)      | GSE51003                    |
| REP (immortalized human immature epididymis epithelial cell) | GSE59783                    |

**Supplementary Table III.** GEO accession numbers for the DNase-Seq data used in this manuscript.

**Supplementary Table IV.** Clover results indicate the number of chromosomes with transcription factor binding motifs statistically over-represented in REP DHS within gene promoter sequence (2kb upstream of transcriptional start sites). Analysis was divided into three groups (all DHS, REP-selective DHS, and ubiquitous DHS). Motifs with more than one entry in the databases utilized were edited to retain only the first occurrence of the motif.

| All DHS x 2kbUp |                         |          |          | REP-selective DHS x 2kbUp |                                         |          |          | Ubiquitous DHS x 2kbUp |                         |          |          |
|-----------------|-------------------------|----------|----------|---------------------------|-----------------------------------------|----------|----------|------------------------|-------------------------|----------|----------|
| ID              | Name                    | P < 0.01 | P > 0.99 | ID                        | Name                                    | P < 0.01 | P > 0.99 | ID                     | Name                    | P < 0.01 | P > 0.99 |
| MA0028.1        | ELK1                    | 23       | 0        | V\$NEUROD_02              | NeuroD                                  | 7        | 0        | MA0027.1               | En1                     | 23       | 0        |
| MA0039.2        | Klf4                    | 23       | 0        | V\$AP1_Q6                 | activator protein 1                     | 5        | 0        | MA0028.1               | ELK1                    | 23       | 0        |
| MA0060.1        | NFYA                    | 23       | 0        | MA0055.1                  | Myf                                     | 4        | 0        | MA0039.2               | Klf4                    | 23       | 0        |
| MA0062.2        | GABPA                   | 23       | 0        | V\$BACH1_01               | BTB and CNC homolog 1                   | 4        | 0        | MA0060.1               | NFYA                    | 23       | 0        |
| MA0068.1        | Pax4                    | 23       | 0        | V\$FRA1_Q5                | FRA1                                    | 4        | 0        | MA0062.2               | GABPA                   | 23       | 0        |
| MA0080.2        | SPI1                    | 23       | 0        | V\$HEB_Q6                 | HEB                                     | 4        | 0        | MA0063.1               | Nkx2-5                  | 23       | 0        |
| MA0098.1        | ETS1                    | 23       | 0        | V\$LMAF_Q2                | LMAF                                    | 4        | 0        | MA0068.1               | Pax4                    | 23       | 0        |
| MA0108.2        | TBP                     | 23       | 0        | V\$FOXP3_Q4               | FOXP3                                   | 4        | 1        | MA0076.1               | ELK4                    | 23       | 0        |
| MA0136.1        | ELF5                    | 23       | 0        | MA0080.2                  | SPI1                                    | 3        | 0        | MA0079.2               | SP1                     | 23       | 0        |
| MA0151.1        | ARID3A                  | 23       | 0        | MA0156.1                  | FEV                                     | 3        | 0        | MA0084.1               | SRY                     | 23       | 0        |
| V\$ALX3_01      | ALX-3                   | 23       | 0        | V\$CMAF_Q2                | C-MAF                                   | 3        | 0        | MA0098.1               | ETS1                    | 23       | 0        |
| V\$ALX4_Q2      | Alx-4                   | 23       | 0        | V\$CREB_Q4                | cAMP-response element binding protein   | 3        | 0        | MA0108.2               | TBP                     | 23       | 0        |
| V\$AMEF2_Q6     | myocyte enhancer factor | 23       | 0        | V\$CREBATF_Q6             | CREB, ATF                               | 3        | 0        | MA0136.1               | ELF5                    | 23       | 0        |
| V\$AP2_Q6       | activator protein 2     | 23       | 0        | V\$CREBP1CJUN_01          | CRE-binding protein 1:c-Jun heterodimer | 3        | 0        | MA0156.1               | FEV                     | 23       | 0        |
| V\$ARX_Q1       | Arx                     | 23       | 0        | V\$HNF4_Q6_Q3             | half-site 2                             | 3        | 0        | V\$ALX3_01             | ALX-3                   | 23       | 0        |
| V\$BARHL1_01    | Barhl-1                 | 23       | 0        | V\$LBP1_Q6                | LBP-1                                   | 3        | 0        | V\$ALX4_Q2             | Alx-4                   | 23       | 0        |
| V\$BARHL2_01    | Barhl2                  | 23       | 0        | V\$MAFA_Q4_Q1             | MAFA                                    | 3        | 0        | V\$AMEF2_Q6            | myocyte enhancer factor | 23       | 0        |
| V\$BARX1_01     | Barx1                   | 23       | 0        | V\$PU1_Q6                 | PU.1                                    | 3        | 0        | V\$AP2_Q6              | activator protein 2     | 23       | 0        |
| V\$BARX2_01     | Barx-2                  | 23       | 0        | MA0090.1                  | TEAD1                                   | 3        | 1        | V\$ARX_Q1              | Arx                     | 23       | 0        |
| V\$BCL6_Q1      | BCL6                    | 23       | 0        | V\$NFE2_Q1                | NF-E2 p45                               | 3        | 1        | V\$BARHL1_Q1           | Barhl-1                 | 23       | 0        |
| V\$BEN_Q1       | BEN                     | 23       | 0        | V\$TEF_Q1                 | TEF b.s.                                | 3        | 1        | V\$BARHL2_Q1           | Barhl2                  | 23       | 0        |
| V\$BRN2_Q1      | POU factor Brn-2        | 23       | 0        | V\$FXR_Q2                 | half-site                               | 3        | 2        | V\$BARX1_Q1            | Barx1                   | 23       | 0        |
| V\$BRN3C_Q1     | Brn-3c                  | 23       | 0        | MA0007.1                  | Ar                                      | 2        | 0        | V\$BARX2_Q1            | Barx-2                  | 23       | 0        |

|                     |                                         |    |   |                             |                                                                       |   |   |                      |                                            |    |   |
|---------------------|-----------------------------------------|----|---|-----------------------------|-----------------------------------------------------------------------|---|---|----------------------|--------------------------------------------|----|---|
| V\$BRN4_01          | Brn-4                                   | 23 | 0 | MA0018.2                    | CREB1                                                                 | 2 | 0 | V\$BCL6_01           | BCL6                                       | 23 | 0 |
| V\$BSX_01           | Bsx                                     | 23 | 0 | MA0106.1                    | TP53                                                                  | 2 | 0 | V\$BRCA_01           | BRCA1 containing protein complex with USF2 | 23 | 0 |
| V\$CART1_02         | CART1                                   | 23 | 0 | MA0108.2                    | TBP                                                                   | 2 | 0 | V\$BRN2_01           | POU factor Brn-2                           | 23 | 0 |
| V\$CDC5_01          | cell division control protein 5         | 23 | 0 | MA0144.1                    | Stat3                                                                 | 2 | 0 | V\$BRN3C_01          | Brn-3c                                     | 23 | 0 |
| V\$CDP_03           | CDP                                     | 23 | 0 | V\$AP1FJ_Q2                 | activator protein 1                                                   | 2 | 0 | V\$BRN4_01           | Brn-4                                      | 23 | 0 |
| V\$CDX1_01          | Cdx-1                                   | 23 | 0 | V\$AP4_Q6                   | activator protein 4                                                   | 2 | 0 | V\$BSX_01            | Bsx                                        | 23 | 0 |
| V\$CDX2_01          | Cdx-2                                   | 23 | 0 | V\$ATF1_Q6                  | ATF1                                                                  | 2 | 0 | V\$CART1_02          | CART1                                      | 23 | 0 |
| V\$CDX_Q5           | Cdx                                     | 23 | 0 | V\$ATF5_01                  | ATF5 binding site                                                     | 2 | 0 | V\$CDC5_01           | cell division control protein 5            | 23 | 0 |
| V\$CEBP_01          | CCAAT/enhancer binding protein          | 23 | 0 | V\$ATF_B                    | ATF binding site                                                      | 2 | 0 | V\$CDP_03            | CDP                                        | 23 | 0 |
| V\$CEBPA_01         | CCAAT/enhancer binding protein alpha    | 23 | 0 | V\$BEN_01                   | BEN                                                                   | 2 | 0 | V\$CDX1_01           | Cdx-1                                      | 23 | 0 |
| V\$CEBPB_01         | CCAAT/enhancer binding protein beta     | 23 | 0 | V\$CACBINDI<br>NGPROTEIN_Q6 | CAC-binding protein                                                   | 2 | 0 | V\$CDX2_01           | Cdx-2                                      | 23 | 0 |
| V\$CEBPGAM<br>MA_Q6 | C/EBPgamma                              | 23 | 0 | V\$ER_Q6_Q2                 | half-site matrix, half-ERE                                            | 2 | 0 | V\$CDX_Q5            | Cdx                                        | 23 | 0 |
| V\$CETS1P54_01      | c-Ets-1(p54)                            | 23 | 0 | V\$ETS1_B                   | c-ETS-1 binding site                                                  | 2 | 0 | V\$CEBP_01           | CCAAT/enhancer binding protein             | 23 | 0 |
| V\$CHCH_01          | Churchill                               | 23 | 0 | V\$ETS2_B                   | c-Ets-2 binding sites                                                 | 2 | 0 | V\$CEBPA_01          | CCAAT/enhancer binding protein alpha       | 23 | 0 |
| V\$CKROX_Q2         | CKROX                                   | 23 | 0 | V\$ETS_Q6                   | Ets                                                                   | 2 | 0 | V\$CEBPGA<br>MMA_Q6  | C/EBPgamma                                 | 23 | 0 |
| V\$CNOT3_01         | CNOT3                                   | 23 | 0 | V\$GR_01                    | high affinity binding site for glucocorticoid receptor                | 2 | 0 | V\$CETS1P54_01       | c-Ets-1(p54)                               | 23 | 0 |
| V\$COMP1_01         | COMP1                                   | 23 | 0 | V\$HSF1_01                  | heat shock factor 1                                                   | 2 | 0 | V\$CKROX_Q2          | CKROX                                      | 23 | 0 |
| V\$CPHX_01          | Cphx                                    | 23 | 0 | V\$HSF2_03                  | HSF2                                                                  | 2 | 0 | V\$CNOT3_01          | CNOT3                                      | 23 | 0 |
| V\$CREB_01          | cAMP-responsive element binding protein | 23 | 0 | V\$LMO2COM_01               | complex of Lmo2 bound to Tal-1, E2A proteins, and GATA-1, half-site 1 | 2 | 0 | V\$COMP1_01          | COMP1                                      | 23 | 0 |
| V\$CRX_02           | Crx                                     | 23 | 0 | V\$MTF1_01                  | MTF1                                                                  | 2 | 0 | V\$CPHX_01           | Cphx                                       | 23 | 0 |
| V\$CTCF_01          | CTCF                                    | 23 | 0 | V\$MYC_Q2                   | Myc                                                                   | 2 | 0 | V\$CREB_01           | cAMP-responsive element binding protein    | 23 | 0 |
| V\$DBX1_01          | Dbx-1                                   | 23 | 0 | V\$MYC_MAX_03               | c-Myc:Max heterodimer                                                 | 2 | 0 | V\$CREBP1<br>CJUN_01 | CRE-binding protein 1:c-Jun heterodimer    | 23 | 0 |
| V\$DBX2_01          | Dbx-2                                   | 23 | 0 | V\$MYOGENIN                 | myogenin                                                              | 2 | 0 | V\$CRX_02            | Crx                                        | 23 | 0 |

|                 |                                                 |    |   | Q6             |                                                    |   |   |                |                                                 |    |   |
|-----------------|-------------------------------------------------|----|---|----------------|----------------------------------------------------|---|---|----------------|-------------------------------------------------|----|---|
| V\$DLX1_01      | Dlx-1                                           | 23 | 0 | V\$MZF1_Q5     | MZF1                                               | 2 | 0 | V\$DBX1_01     | Dbx-1                                           | 23 | 0 |
| V\$DLX2_01      | Dlx-2                                           | 23 | 0 | V\$NFKAPPAB_01 | NF-kappaB                                          | 2 | 0 | V\$DBX2_01     | Dbx-2                                           | 23 | 0 |
| V\$DLX3_01      | dlx3                                            | 23 | 0 | V\$NFKB_C      | NF-kappaB binding site                             | 2 | 0 | V\$DLX1_01     | Dlx-1                                           | 23 | 0 |
| V\$DLX5_01      | dlx5                                            | 23 | 0 | V\$NRF1_Q6     | nuclear respiratory factor 1                       | 2 | 0 | V\$DLX2_01     | Dlx-2                                           | 23 | 0 |
| V\$DLX7_01      | Dlx7                                            | 23 | 0 | V\$OLF1_01     | olfactory neuron-specific factor                   | 2 | 0 | V\$DLX3_01     | dlx3                                            | 23 | 0 |
| V\$DOBOX4_01    | Dobox4                                          | 23 | 0 | V\$P53_04      | tumor suppressor p53                               | 2 | 0 | V\$DLX5_01     | dlx5                                            | 23 | 0 |
| V\$DOBOX5_01    | Dobox5                                          | 23 | 0 | V\$PTF1BETA_Q6 | PTF1-beta                                          | 2 | 0 | V\$DLX7_01     | Dlx7                                            | 23 | 0 |
| V\$DUXL_01      | Duxl                                            | 23 | 0 | V\$ROAZ_01     | rat Olf-1/EBF-associated zinc finger protein       | 2 | 0 | V\$DOBOX4_01   | Dobox4                                          | 23 | 0 |
| V\$E2F1_01      | E2F1                                            | 23 | 0 | V\$SMAD3_Q6    | SMAD3                                              | 2 | 0 | V\$DOBOX5_01   | Dobox5                                          | 23 | 0 |
| V\$E2F6_01      | E2F6                                            | 23 | 0 | V\$SMAD4_Q6    | SMAD4                                              | 2 | 0 | V\$DRI1_01     | DRI1 b.s.                                       | 23 | 0 |
| V\$ELF1_Q5      | ELF1                                            | 23 | 0 | V\$STAT6_02    | signal transducer and activator of transcription 6 | 2 | 0 | V\$DUXL_01     | Duxl                                            | 23 | 0 |
| V\$EMX2_01      | EMX2                                            | 23 | 0 | V\$TAL1_Q6     | TAL1                                               | 2 | 0 | V\$E2F1_01     | E2F1                                            | 23 | 0 |
| V\$EN1_02       | En-1                                            | 23 | 0 | V\$TATA_01     | cellular and viral TATA box elements               | 2 | 0 | V\$E2F1DP_1_01 | E2F-1:DP-1 heterodimer                          | 23 | 0 |
| V\$EN2_01       | En-2                                            | 23 | 0 | V\$USF_Q6_01   | USF                                                | 2 | 0 | V\$E2F6_01     | E2F6                                            | 23 | 0 |
| V\$ERG_01       | ERG                                             | 23 | 0 | MA0047.2       | Foxa2                                              | 2 | 1 | V\$E2F_Q2      | E2F                                             | 23 | 0 |
| V\$ESX1_01      | Esx1                                            | 23 | 0 | MA0102.2       | CEBPA                                              | 2 | 1 | V\$ELF1_Q5     | ELF1                                            | 23 | 0 |
| V\$ETF_Q6       | ETF                                             | 23 | 0 | V\$BLIMP1_Q6   | BLIMP1                                             | 2 | 1 | V\$EMX2_01     | EMX2                                            | 23 | 0 |
| V\$ETS2_Q6      | ETS2                                            | 23 | 0 | V\$CEBPB_01    | CCAAT/enhancer binding protein beta                | 2 | 1 | V\$EN2_01      | En-2                                            | 23 | 0 |
| V\$ETS_Q6       | Ets                                             | 23 | 0 | V\$NFAT3_Q3    | NFAT3                                              | 2 | 1 | V\$ERG_01      | ERG                                             | 23 | 0 |
| V\$EVI1_04      | ectopic viral integration site 1 encoded factor | 23 | 0 | V\$P300_01     | p300                                               | 2 | 1 | V\$ESX1_01     | Esx1                                            | 23 | 0 |
| V\$EVX1_01      | Evx-1                                           | 23 | 0 | V\$PR_Q2       | half-site matrix                                   | 2 | 1 | V\$ETF_Q6      | ETF                                             | 23 | 0 |
| V\$EVX2_01      | Evx2                                            | 23 | 0 | V\$SF1_Q6      | SF1                                                | 2 | 1 | V\$EVI1_04     | ectopic viral integration site 1 encoded factor | 23 | 0 |
| V\$FLI1_Q6      | FLI1                                            | 23 | 0 | V\$SRF_Q5_01   | SRF                                                | 2 | 1 | V\$EVX1_01     | Evx-1                                           | 23 | 0 |
| V\$FOXP3_01     | forkhead box P3                                 | 23 | 0 | V\$T3R_Q6      | half-site matrix                                   | 2 | 1 | V\$EVX2_01     | Evx2                                            | 23 | 0 |
| V\$GABP_B       | GA binding protein                              | 23 | 0 | V\$TBR2_01     | TBR2                                               | 2 | 1 | V\$FLI1_Q6     | FLI1                                            | 23 | 0 |
| V\$GABPALPHA_Q4 | GABP-alpha                                      | 23 | 0 | V\$E2F_03      | E2F                                                | 2 | 2 | V\$FOXJ2_02    | fork head box J 2                               | 23 | 0 |

|              |                                   |    |   |                |                                                    |   |   |                  |                                   |    |   |
|--------------|-----------------------------------|----|---|----------------|----------------------------------------------------|---|---|------------------|-----------------------------------|----|---|
| V\$GADP_01   | Growth-associated binding protein | 23 | 0 | MA0002.2       | RUNX1                                              | 1 | 0 | V\$FOXO1_02      | fork head box O1                  | 23 | 0 |
| V\$GBX1_01   | Gbx1                              | 23 | 0 | MA0004.1       | Arnt                                               | 1 | 0 | V\$FOXO3A_Q1     | FOXO3A                            | 23 | 0 |
| V\$GBX2_01   | Gbx2                              | 23 | 0 | MA0038.1       | Gfi                                                | 1 | 0 | V\$FOXO4_01      | fork head box O4                  | 23 | 0 |
| V\$GSC_01    | Gsc                               | 23 | 0 | MA0059.1       | MYC::MAX                                           | 1 | 0 | V\$FOXP3_01      | forkhead box P3                   | 23 | 0 |
| V\$GSH2_01   | GSH2                              | 23 | 0 | MA0060.1       | NFYA                                               | 1 | 0 | V\$GABP_B        | GA binding protein                | 23 | 0 |
| V\$HB24_01   | HB24                              | 23 | 0 | MA0061.1       | NF-kappaB                                          | 1 | 0 | V\$GABPAL_PHA_Q4 | GABP-alpha                        | 23 | 0 |
| V\$HB9_01    | HB9                               | 23 | 0 | MA0066.1       | PPARG                                              | 1 | 0 | V\$GADP_01       | Growth-associated binding protein | 23 | 0 |
| V\$HDX_01    | Hdx                               | 23 | 0 | MA0073.1       | RREB1                                              | 1 | 0 | V\$GBX1_01       | Gbx1                              | 23 | 0 |
| V\$HMBOX1_01 | Hmbox1                            | 23 | 0 | MA0081.1       | SPIB                                               | 1 | 0 | V\$GBX2_01       | Gbx2                              | 23 | 0 |
| V\$HMGYI_01  | HMGYI                             | 23 | 0 | MA0092.1       | Hand1::Tcf2a                                       | 1 | 0 | V\$GKLF_02       | GKLF (KLF4)                       | 23 | 0 |
| V\$HMX1_02   | HMX1                              | 23 | 0 | MA0107.1       | RELA                                               | 1 | 0 | V\$GSC_01        | Gsc                               | 23 | 0 |
| V\$HMX3_02   | Nkx5-1                            | 23 | 0 | MA0112.2       | ESR1                                               | 1 | 0 | V\$GSH2_01       | GSH2                              | 23 | 0 |
| V\$HNF1_02   | HNF-1alpha                        | 23 | 0 | MA0133.1       | BRCA1                                              | 1 | 0 | V\$HB24_01       | HB24                              | 23 | 0 |
| V\$HNF1B_01  | HNF-1beta                         | 23 | 0 | MA0137.2       | STAT1                                              | 1 | 0 | V\$HB9_01        | HB9                               | 23 | 0 |
| V\$HOMEZ_01  | Homez                             | 23 | 0 | MA0145.1       | Tcf2l1                                             | 1 | 0 | V\$HBP1_Q2       | hbp1                              | 23 | 0 |
| V\$HOX13_02  | HOXA5                             | 23 | 0 | MA0154.1       | EBF1                                               | 1 | 0 | V\$HDX_01        | Hdx                               | 23 | 0 |
| V\$HOXA10_01 | HOXA10                            | 23 | 0 | MA0161.1       | NFIC                                               | 1 | 0 | V\$HELIOS_A_02   | Helios A                          | 23 | 0 |
| V\$HOXA11_01 | HOXA11                            | 23 | 0 | MA0258.1       | ESR2                                               | 1 | 0 | V\$HMBOX1_01     | Hmbox1                            | 23 | 0 |
| V\$HOXA13_01 | HOXA13 binding site               | 23 | 0 | V\$AML1_Q4     | AML1                                               | 1 | 0 | V\$HMGYI_01      | HMGYI                             | 23 | 0 |
| V\$HOXA1_01  | HOXA1                             | 23 | 0 | V\$AML2_01     | AML2                                               | 1 | 0 | V\$HMX1_02       | HMX1                              | 23 | 0 |
| V\$HOXA2_01  | HoxA2                             | 23 | 0 | V\$AP2ALPHA_02 | AP-2alphaA                                         | 1 | 0 | V\$HMX3_02       | Nkx5-1                            | 23 | 0 |
| V\$HOXA3_02  | HOXA3                             | 23 | 0 | V\$AP2REP_01   | AP-2 repressor                                     | 1 | 0 | V\$HNF1_01       | hepatic nuclear factor 1          | 23 | 0 |
| V\$HOXA4_01  | HOXA4                             | 23 | 0 | V\$AREB6_01    | AREB6 (Atp1a1 regulatory element binding factor 6) | 1 | 0 | V\$HNF1B_01      | HNF-1beta                         | 23 | 0 |
| V\$HOXA6_01  | HOXA6                             | 23 | 0 | V\$ATF4_Q2     | activating transcription factor 4                  | 1 | 0 | V\$HNF3_Q6_01    | HNF3                              | 23 | 0 |



|              |        |    |   |                |                                                       |   |   |              |                                  |    |   |
|--------------|--------|----|---|----------------|-------------------------------------------------------|---|---|--------------|----------------------------------|----|---|
| V\$HOXA7_02  | HOXA7  | 23 | 0 | V\$BACH2_01    | BTB and CNC homolog 2                                 | 1 | 0 | V\$HOMEZ_01  | Homez                            | 23 | 0 |
| V\$HOXA9_01  | hoxa9  | 23 | 0 | V\$BCL6_Q3     | BCL6                                                  | 1 | 0 | V\$HOX13_02  | HOXA5                            | 23 | 0 |
| V\$HOXB13_01 | HOXB13 | 23 | 0 | V\$CACD_01     | CACD                                                  | 1 | 0 | V\$HOXA10_01 | HOXA10                           | 23 | 0 |
| V\$HOXB3_01  | HOXB3  | 23 | 0 | V\$CEBP_C      | C/EBP binding site                                    | 1 | 0 | V\$HOXA11_01 | HOXA11                           | 23 | 0 |
| V\$HOXB4_01  | HOXB4  | 23 | 0 | V\$CETS1P54_02 | c-Ets-1(p54)                                          | 1 | 0 | V\$HOXA13_02 | HOXA13                           | 23 | 0 |
| V\$HOXB5_01  | HoxB5  | 23 | 0 | V\$CMYC_01     | c-Myc site                                            | 1 | 0 | V\$HOXA1_01  | HOXA1                            | 23 | 0 |
| V\$HOXB6_01  | HOXB6  | 23 | 0 | V\$E47_01      | E47                                                   | 1 | 0 | V\$HOXA2_01  | HoxA2                            | 23 | 0 |
| V\$HOXB7_01  | HOXB7  | 23 | 0 | V\$EAR2_Q2     | EAR2                                                  | 1 | 0 | V\$HOXA3_01  | HOXA3 (homeobox cluster protein) | 23 | 0 |
| V\$HOXB8_01  | HOXB8  | 23 | 0 | V\$EBF_Q6      | EBF                                                   | 1 | 0 | V\$HOXA4_01  | HOXA4                            | 23 | 0 |
| V\$HOXB9_01  | HOXB9  | 23 | 0 | V\$EBOX_Q6_01  | Ebox                                                  | 1 | 0 | V\$HOXA6_01  | HOXA6                            | 23 | 0 |
| V\$HOXC10_01 | HOXC10 | 23 | 0 | V\$ELF1_Q5     | ELF1                                                  | 1 | 0 | V\$HOXA7_02  | HOXA7                            | 23 | 0 |
| V\$HOXC11_01 | HOXC11 | 23 | 0 | V\$ELF5_01     | ELF5                                                  | 1 | 0 | V\$HOXA9_01  | hoxa9                            | 23 | 0 |
| V\$HOXC12_01 | HOXC12 | 23 | 0 | V\$ELK1_01     | Elk-1                                                 | 1 | 0 | V\$HOXB13_01 | HOXB13                           | 23 | 0 |
| V\$HOXC13_01 | HOXC13 | 23 | 0 | V\$FLI1_Q6     | FLI1                                                  | 1 | 0 | V\$HOXB3_01  | HOXB3                            | 23 | 0 |
| V\$HOXC4_01  | HOXC4  | 23 | 0 | V\$FPM315_01   | Zinc finger protein FPM315 with KRAB and SCAN domains | 1 | 0 | V\$HOXB4_01  | HOXB4                            | 23 | 0 |
| V\$HOXC5_01  | HOXC5  | 23 | 0 | V\$GAF_Q6      | GAF                                                   | 1 | 0 | V\$HOXB5_01  | HoxB5                            | 23 | 0 |
| V\$HOXC6_01  | HOXC6  | 23 | 0 | V\$GATA1_01    | GATA-binding factor 1                                 | 1 | 0 | V\$HOXB6_01  | HOXB6                            | 23 | 0 |
| V\$HOXC8_01  | HOXC-8 | 23 | 0 | V\$GATA6_01    | GATA-6                                                | 1 | 0 | V\$HOXB7_01  | HOXB7                            | 23 | 0 |
| V\$HOXC9_01  | HOXC9  | 23 | 0 | V\$GLI3_Q5_01  | GLI3                                                  | 1 | 0 | V\$HOXB8_01  | HOXB8                            | 23 | 0 |
| V\$HOXD10_01 | HOXD10 | 23 | 0 | V\$HAND1E47_01 | Hand1:E47 heterodimer                                 | 1 | 0 | V\$HOXB9_01  | HOXB9                            | 23 | 0 |
| V\$HOXD11_01 | HOXD11 | 23 | 0 | V\$HMX1_01     | H6 homeobox 3                                         | 1 | 0 | V\$HOXC10_01 | HOXC10                           | 23 | 0 |
| V\$HOXD12_01 | HOXD12 | 23 | 0 | V\$HSF_Q6      | HSF                                                   | 1 | 0 | V\$HOXC11_01 | HOXC11                           | 23 | 0 |
| V\$HOXD13_01 | HOXD13 | 23 | 0 | V\$ING4_01     | ING4                                                  | 1 | 0 | V\$HOXC12    | HOXC12                           | 23 | 0 |

|             |        |    |   |                   |                                                     |   |   |                      |                 |    |   |
|-------------|--------|----|---|-------------------|-----------------------------------------------------|---|---|----------------------|-----------------|----|---|
| 1           |        |    |   |                   |                                                     |   |   |                      | _01             |    |   |
| V\$HOXD1_01 | HOXD1  | 23 | 0 | V\$KAISO_01       | KAISO                                               | 1 | 0 | V\$HOXC13_01         | HOXC13          | 23 | 0 |
| V\$HOXD3_01 | HOXD3  | 23 | 0 | V\$LBP9_01        | LBP9 (Tcfcp211)                                     | 1 | 0 | V\$HOXC4_01          | HOXC4           | 23 | 0 |
| V\$HOXD8_01 | HOXD8  | 23 | 0 | V\$LRH1_Q5        | LRH1                                                | 1 | 0 | V\$HOXC5_01          | HOXC5           | 23 | 0 |
| V\$IPF1_06  | ipf1   | 23 | 0 | V\$MAFB_01        | MAFB                                                | 1 | 0 | V\$HOXC6_01          | HOXC6           | 23 | 0 |
| V\$IRF3_Q3  | IRF3   | 23 | 0 | V\$MATH1_Q2       | E47:MATH1                                           | 1 | 0 | V\$HOXC8_01          | HOXC-8          | 23 | 0 |
| V\$IRF_Q6   | IRF    | 23 | 0 | V\$MAZ_Q6         | MAZ                                                 | 1 | 0 | V\$HOXC9_01          | HOXC9           | 23 | 0 |
| V\$IRX2_01  | Irx2   | 23 | 0 | V\$MEIS1_01       | Meis-1 (myeloid ecotropic viral integration site 1) | 1 | 0 | V\$HOXD10_01         | HOXD10          | 23 | 0 |
| V\$IRX3_01  | Irx-3  | 23 | 0 | V\$MEIS1AHOXA9_01 | Meis-1a:HOXA9 heterodimeric binding                 | 1 | 0 | V\$HOXD11_01         | HOXD11          | 23 | 0 |
| V\$IRX4_01  | IRX4   | 23 | 0 | V\$MEIS2_02       | MEIS2                                               | 1 | 0 | V\$HOXD12_01         | HOXD12          | 23 | 0 |
| V\$IRX5_01  | Irx5   | 23 | 0 | V\$MYB_Q6         | c-Myb                                               | 1 | 0 | V\$HOXD13_01         | HOXD13          | 23 | 0 |
| V\$IRXB3_01 | IRXB3  | 23 | 0 | V\$MYOD_Q6        | myoblast determining factor                         | 1 | 0 | V\$HOXD1_01          | HOXD1           | 23 | 0 |
| V\$ISL2_01  | Isl2   | 23 | 0 | V\$NF1_Q6         | nuclear factor 1                                    | 1 | 0 | V\$HOXD3_01          | HOXD3           | 23 | 0 |
| V\$ISX_01   | isx    | 23 | 0 | V\$NFAT_Q4_01     | NF-AT                                               | 1 | 0 | V\$HOXD8_01          | HOXD8           | 23 | 0 |
| V\$K2B_01   | K-2b   | 23 | 0 | V\$NFKAPPAB65_01  | NF-kappaB (p65)                                     | 1 | 0 | V\$HP1SITE_FACTOR_Q6 | HP1 site factor | 23 | 0 |
| V\$KROX_Q6  | KROX   | 23 | 0 | V\$NFY_01         | nuclear factor Y (Y-box binding factor)             | 1 | 0 | V\$IPF1_06           | ipf1            | 23 | 0 |
| V\$Lbx2_01  | Lbx2   | 23 | 0 | V\$NGFIC_01       | nerve growth factor-induced protein C               | 1 | 0 | V\$IRF3_Q3           | IRF3            | 23 | 0 |
| V\$LH2_01   | LH-2   | 23 | 0 | V\$NMYC_01        | N-Myc                                               | 1 | 0 | V\$IRX2_01           | Irx2            | 23 | 0 |
| V\$LHX3_02  | Lhx3   | 23 | 0 | V\$NRF2_01        | nuclear respiratory factor 2                        | 1 | 0 | V\$IRX3_01           | Irx-3           | 23 | 0 |
| V\$LHX4_01  | Lhx4   | 23 | 0 | V\$P50P50_Q3      | P50:P50                                             | 1 | 0 | V\$IRX4_01           | IRX4            | 23 | 0 |
| V\$LHX5_01  | Lhx5   | 23 | 0 | V\$PARP_Q3        | PARP                                                | 1 | 0 | V\$IRX5_01           | Irx5            | 23 | 0 |
| V\$LHX61_01 | lhx6.1 | 23 | 0 | V\$PAX4_03        | Pax-4 binding sites                                 | 1 | 0 | V\$IRXB3_01          | IRXB3           | 23 | 0 |
| V\$LHX8_01  | Lhx8   | 23 | 0 | V\$PAX5_02        | B-cell-specific activating protein                  | 1 | 0 | V\$ISL2_01           | Isl2            | 23 | 0 |
| V\$LHX9_01  | Lhx9   | 23 | 0 | V\$PAX8_B         | Pax-8 binding sites                                 | 1 | 0 | V\$ISX_01            | isx             | 23 | 0 |

|               |                                                       |    |   |              |                                                    |   |   |               |                                                       |    |   |
|---------------|-------------------------------------------------------|----|---|--------------|----------------------------------------------------|---|---|---------------|-------------------------------------------------------|----|---|
| V\$LIM1_01    | Lim-1                                                 | 23 | 0 | V\$PEA3_Q6   | PEA3                                               | 1 | 0 | V\$K2B_01     | K-2b                                                  | 23 | 0 |
| V\$LMX1_01    | Lmx-1                                                 | 23 | 0 | V\$PUR1_Q4   | PUR1                                               | 1 | 0 | V\$KROX_Q6    | KROX                                                  | 23 | 0 |
| V\$LMX1B_01   | lmx1b                                                 | 23 | 0 | V\$RFX_Q6    | RFX                                                | 1 | 0 | V\$LBX2_01    | Lbx2                                                  | 23 | 0 |
| V\$MAZ_Q6     | MAZ                                                   | 23 | 0 | V\$SEF1_C    | SEF1 binding site                                  | 1 | 0 | V\$LH2_01     | LH-2                                                  | 23 | 0 |
| V\$MEF2_Q6_01 | MEF-2                                                 | 23 | 0 | V\$SP2_01    | SP2                                                | 1 | 0 | V\$LHX3_02    | Lhx3                                                  | 23 | 0 |
| V\$MEIS1_02   | Meis1                                                 | 23 | 0 | V\$SP3_Q3    | Sp3                                                | 1 | 0 | V\$LHX4_01    | Lhx4                                                  | 23 | 0 |
| V\$MEIS2_01   | Meis2                                                 | 23 | 0 | V\$SREBP2_Q6 | SREBP2                                             | 1 | 0 | V\$LHX5_01    | Lhx5                                                  | 23 | 0 |
| V\$MMEF2_Q6   | myocyte enhancer factor                               | 23 | 0 | V\$STAT4_Q4  | STAT4                                              | 1 | 0 | V\$LHX61_01   | lhx6.1                                                | 23 | 0 |
| V\$MOX1_01    | Mox1                                                  | 23 | 0 | V\$STAT_01   | signal transducers and activators of transcription | 1 | 0 | V\$LHX8_01    | Lhx8                                                  | 23 | 0 |
| V\$MRG2_01    | MRG2                                                  | 23 | 0 | V\$TBX15_01  | T-box 15                                           | 1 | 0 | V\$LHX9_01    | Lhx9                                                  | 23 | 0 |
| V\$MSX1_01    | msh-like (muscle segment homeobox) homeobox protein 1 | 23 | 0 | V\$TCF11_01  | TCF11/KCR-F1/Nrf1 homodimers                       | 1 | 0 | V\$LIM1_01    | Lim-1                                                 | 23 | 0 |
| V\$MSX2_01    | Msx-2                                                 | 23 | 0 | V\$TCF4_03   | Tcf-4 dimer                                        | 1 | 0 | V\$LMX1_01    | Lmx-1                                                 | 23 | 0 |
| V\$MSX3_01    | Msx-3                                                 | 23 | 0 | V\$TR4_01    | TR4                                                | 1 | 0 | V\$LMX1B_01   | lmx1b                                                 | 23 | 0 |
| V\$NCX_02     | Ncx                                                   | 23 | 0 | V\$USF2_Q6   | USF2                                               | 1 | 0 | V\$MAZ_Q6     | MAZ                                                   | 23 | 0 |
| V\$NFY_01     | nuclear factor Y (Y-box binding factor)               | 23 | 0 | V\$WHN_B     | winged-helix factor nude                           | 1 | 0 | V\$MEF2_Q6_01 | MEF-2                                                 | 23 | 0 |
| V\$NKX11_01   | Nkx1-1                                                | 23 | 0 | V\$ZABC1_01  | ZABC1 b.s.                                         | 1 | 0 | V\$MEIS1_02   | Meis1                                                 | 23 | 0 |
| V\$NKX12_01   | Nkx1-2                                                | 23 | 0 | V\$ZBED6_01  | ZBED6                                              | 1 | 0 | V\$MEIS2_01   | Meis2                                                 | 23 | 0 |
| V\$NKX21_01   | Nkx2-1                                                | 23 | 0 | V\$ZBRK1_01  | ZBRK1                                              | 1 | 0 | V\$MMEF2_Q6   | myocyte enhancer factor                               | 23 | 0 |
| V\$NKX22_02   | NKX22                                                 | 23 | 0 | V\$ZF5_B     | ZF5 binding sites                                  | 1 | 0 | V\$MOX1_01    | Mox1                                                  | 23 | 0 |
| V\$NKX23_01   | Nkx2-3                                                | 23 | 0 | V\$ZFP206_01 | Zfp206                                             | 1 | 0 | V\$MRG2_01    | MRG2                                                  | 23 | 0 |
| V\$NKX24_01   | Nkx2-4                                                | 23 | 0 | V\$ZIC1_01   | zinc finger protein of the cerebellum 1            | 1 | 0 | V\$MSX1_01    | msh-like (muscle segment homeobox) homeobox protein 1 | 23 | 0 |
| V\$NKX25_03   | NKX25                                                 | 23 | 0 | V\$ZIC2_01   | zinc finger protein of the cerebellum 2            | 1 | 0 | V\$MSX2_01    | Msx-2                                                 | 23 | 0 |
| V\$NKX26_01   | Nkx2-6                                                | 23 | 0 | MA0009.1     | T                                                  | 1 | 1 | V\$MSX3_01    | Msx-3                                                 | 23 | 0 |

|               |                                |    |   |                 |                                             |   |   |             |                                                 |    |   |
|---------------|--------------------------------|----|---|-----------------|---------------------------------------------|---|---|-------------|-------------------------------------------------|----|---|
| V\$NKX29_01   | Nkx2-9                         | 23 | 0 | MA0036.1        | GATA2                                       | 1 | 1 | V\$NANOG_02 | Nanog                                           | 23 | 0 |
| V\$NKX32_02   | Nkx3-2                         | 23 | 0 | MA0058.1        | MAX                                         | 1 | 1 | V\$NCX_01   | Ncx                                             | 23 | 0 |
| V\$NKX3A_02   | Nkx3A                          | 23 | 0 | MA0089.1        | NFE2L1::MafG                                | 1 | 1 | V\$NFAT_Q6  | Nuclear factor of activated T-cells             | 23 | 0 |
| V\$NKX52_01   | Nkx5-2                         | 23 | 0 | F\$AMT1_Q2      | AMT1                                        | 1 | 1 | V\$NFY_01   | nuclear factor Y (Y-box binding factor)         | 23 | 0 |
| V\$NKX61_01   | NKX6-1                         | 23 | 0 | V\$AHRARNT_01   | aryl hydrocarbon receptor:Arnt heterodimers | 1 | 1 | V\$NKX11_01 | Nkx1-1                                          | 23 | 0 |
| V\$NKX62_Q2   | NK related homeobox factor 6-2 | 23 | 0 | V\$AML_Q6       | AML                                         | 1 | 1 | V\$NKX12_01 | Nkx1-2                                          | 23 | 0 |
| V\$NKX63_01   | Nkx6-3                         | 23 | 0 | V\$CMYB_01      | c-Myb                                       | 1 | 1 | V\$NKX21_01 | Nkx2-1                                          | 23 | 0 |
| V\$NRF2_01    | nuclear respiratory factor 2   | 23 | 0 | V\$E2F1_02      | E2F1                                        | 1 | 1 | V\$NKX22_02 | NKX22                                           | 23 | 0 |
| V\$OBOX1_01   | Obox1                          | 23 | 0 | V\$E2F1DP1_01   | E2F-1:DP-1 heterodimer                      | 1 | 1 | V\$NKX23_01 | Nkx2-3                                          | 23 | 0 |
| V\$OBOX2_01   | Obox2                          | 23 | 0 | V\$GATA3_01     | GATA-binding factor 3                       | 1 | 1 | V\$NKX24_01 | Nkx2-4                                          | 23 | 0 |
| V\$OBOX3_01   | Obox3                          | 23 | 0 | V\$MAF_Q6_01    | MAF                                         | 1 | 1 | V\$NKX25_02 | homeo domain factor Nkx-2.5/Csx, tinman homolog | 23 | 0 |
| V\$OBOX5_01   | Obox5                          | 23 | 0 | V\$OCT1_Q6      | octamer factor 1                            | 1 | 1 | V\$NKX26_01 | Nkx2-6                                          | 23 | 0 |
| V\$OBOX6_01   | Obox6                          | 23 | 0 | V\$PAX3_01      | Pax-3 binding sites                         | 1 | 1 | V\$NKX29_01 | Nkx2-9                                          | 23 | 0 |
| V\$OCT1_03    | octamer factor 1               | 23 | 0 | V\$PAX6_Q2      | Pax-6                                       | 1 | 1 | V\$NKX32_02 | Nkx3-2                                          | 23 | 0 |
| V\$OCT2_01    | 2-Oct                          | 23 | 0 | V\$RELBP52_01   | kappaB site                                 | 1 | 1 | V\$NKX3A_02 | Nkx3A                                           | 23 | 0 |
| V\$OCT_Q6     | Octamer                        | 23 | 0 | V\$TEF1_Q6      | TEF-1                                       | 1 | 1 | V\$NKX52_01 | Nkx5-2                                          | 23 | 0 |
| V\$OCTAMER_01 | Octamer                        | 23 | 0 | MA0148.1        | FOXA1                                       | 1 | 2 | V\$NKX61_01 | NKX6-1                                          | 23 | 0 |
| V\$OG2_02     | OG-2                           | 23 | 0 | MA0150.1        | NFE2L2                                      | 1 | 2 | V\$NKX62_Q2 | NK related homeobox factor 6-2                  | 23 | 0 |
| V\$OTP_01     | OTP                            | 23 | 0 | V\$CEBPDELTA_Q6 | C/EBPdelta                                  | 1 | 2 | V\$NKX63_01 | Nkx6-3                                          | 23 | 0 |
| V\$OTX1_01    | Otx1                           | 23 | 0 | V\$CEBPE_01     | cebpe                                       | 1 | 2 | V\$NRF2_01  | nuclear respiratory factor 2                    | 23 | 0 |
| V\$OTX2_01    | Otx2                           | 23 | 0 | V\$HLF_01       | hepatic leukemia factor                     | 1 | 2 | V\$OBOX1_01 | Obox1                                           | 23 | 0 |
| V\$OTX3_01    | Otx3                           | 23 | 0 | V\$HOXA7_01     | HOXA7                                       | 1 | 2 | V\$OBOX2_01 | Obox2                                           | 23 | 0 |
| V\$P53_03     | tumor suppressor p53           | 23 | 0 | V\$IRF2_01      | interferon regulatory factor 2              | 1 | 2 | V\$OBOX3_01 | Obox3                                           | 23 | 0 |

|              |                                  |    |   |              |                                               |   |   |                |                      |    |   |
|--------------|----------------------------------|----|---|--------------|-----------------------------------------------|---|---|----------------|----------------------|----|---|
| V\$PARP_Q3   | PARP                             | 23 | 0 | V\$OCT2_02   | 2-Oct                                         | 1 | 2 | V\$OBOX5_01    | Obox5                | 23 | 0 |
| V\$PAX2_01   | Pax-2                            | 23 | 0 | V\$OCT4_02   | Oct-4 (POU5F1)                                | 1 | 2 | V\$OBOX6_01    | Obox6                | 23 | 0 |
| V\$PAX6_02   | pax6                             | 23 | 0 | V\$SATB1_Q3  | SATB1                                         | 1 | 2 | V\$OCT1_03     | octamer factor 1     | 23 | 0 |
| V\$PAX7_01   | Pax-7                            | 23 | 0 | V\$SIRT6_01  | SIRT6                                         | 1 | 2 | V\$OCT2_01     | 2-Oct                | 23 | 0 |
| V\$PAX8_01   | Pax-8 binding sites              | 23 | 0 | V\$SOX9_B1   | SOX (SRY-related HMG box)                     | 1 | 2 | V\$OCT_Q6      | Octamer              | 23 | 0 |
| V\$PBX1_01   | Pbx-1                            | 23 | 0 | V\$DMRT1_01  | DMRT1                                         | 1 | 3 | V\$OCTAME_R_01 | Octamer              | 23 | 0 |
| V\$PEA3_Q6   | PEA3                             | 23 | 0 | V\$RORA1_01  | RAR-related orphan receptor alpha1            | 1 | 3 | V\$OG2_02      | OG-2                 | 23 | 0 |
| V\$PIT1_01   | Pit-1                            | 23 | 0 | V\$TITF1_Q3  | TTF-1, TITF1 (thyroid transcription factor 1) | 1 | 3 | V\$OTP_01      | OTP                  | 23 | 0 |
| V\$PITX1_01  | Pitx1                            | 23 | 0 | MA0050.1     | IRF1                                          | 1 | 4 | V\$OTX1_01     | Otx1                 | 23 | 0 |
| V\$PITX2_01  | PITX2                            | 23 | 0 | V\$DMRT7_01  | DMRT7                                         | 1 | 4 | V\$OTX2_01     | Otx2                 | 23 | 0 |
| V\$PITX3_01  | Pitx3                            | 23 | 0 | V\$HMEF2_Q6  | myocyte enhancer factor                       | 1 | 4 | V\$OTX3_01     | Otx3                 | 23 | 0 |
| V\$PKNOX2_01 | PKNOX2                           | 23 | 0 | V\$IPF1_03   | A3                                            | 1 | 4 | V\$OTX_Q1      | OTX                  | 23 | 0 |
| V\$PMX2A_01  | PMX2A                            | 23 | 0 | V\$NKX22_01  | NK2 class homeobox factor 2                   | 1 | 4 | V\$P53_03      | tumor suppressor p53 | 23 | 0 |
| V\$PMX2B_01  | PMX2B                            | 23 | 0 | MA0041.1     | Foxd3                                         | 1 | 5 | V\$PARP_Q3     | PARP                 | 23 | 0 |
| V\$POU2F3_01 | POU2F3                           | 23 | 0 | V\$LHX3_01   | LIM homeobox transcription factor 3           | 1 | 5 | V\$PAX2_01     | Pax-2                | 23 | 0 |
| V\$POU6F1_02 | POU6F1                           | 23 | 0 | MA0030.1     | FOXF2                                         | 1 | 6 | V\$PAX6_02     | pax6                 | 23 | 0 |
| V\$PREP1_01  | PREP1                            | 23 | 0 | V\$RSRFC4_Q2 | RSRFC4                                        | 1 | 6 | V\$PAX7_01     | Pax-7                | 23 | 0 |
| V\$PROP1_02  | Prop-1                           | 23 | 0 |              |                                               |   |   | V\$PAX8_01     | Pax-8 binding sites  | 23 | 0 |
| V\$PSX1_01   | PSX1                             | 23 | 0 |              |                                               |   |   | V\$PBX1_01     | Pbx-1                | 23 | 0 |
| V\$PXRRXR_01 | RXR half-site                    | 23 | 0 |              |                                               |   |   | V\$PEA3_Q6     | PEA3                 | 23 | 0 |
| V\$RAX_01    | rax                              | 23 | 0 |              |                                               |   |   | V\$PIT1_01     | Pit-1                | 23 | 0 |
| V\$RHGX11_01 | Rhox11                           | 23 | 0 |              |                                               |   |   | V\$PITX1_01    | Pitx1                | 23 | 0 |
| V\$S8_02     | S8                               | 23 | 0 |              |                                               |   |   | V\$PITX2_01    | PITX2                | 23 | 0 |
| V\$SATB1_01  | Consensus SATB1 Binding Sequence | 23 | 0 |              |                                               |   |   | V\$PITX3_01    | Pitx3                | 23 | 0 |

|                  |                                                     |    |   |  |  |  |              |                                  |    |   |
|------------------|-----------------------------------------------------|----|---|--|--|--|--------------|----------------------------------|----|---|
| V\$SHOX2_01      | Shox2                                               | 23 | 0 |  |  |  | V\$PKNOX2_01 | PKNOX2                           | 23 | 0 |
| V\$SIX1_01       | Six-1                                               | 23 | 0 |  |  |  | V\$PMX2A_01  | PMX2A                            | 23 | 0 |
| V\$SIX2_01       | Six-2                                               | 23 | 0 |  |  |  | V\$PMX2B_01  | PMX2B                            | 23 | 0 |
| V\$SIX3_01       | Six-3                                               | 23 | 0 |  |  |  | V\$POU2F3_01 | POU2F3                           | 23 | 0 |
| V\$SIX4_01       | six4                                                | 23 | 0 |  |  |  | V\$POU6F1_02 | POU6F1                           | 23 | 0 |
| V\$SIX6_01       | Six-6                                               | 23 | 0 |  |  |  | V\$PREP1_01  | PREP1                            | 23 | 0 |
| V\$SOX4_01       | SOX4                                                | 23 | 0 |  |  |  | V\$PROP1_02  | Prop-1                           | 23 | 0 |
| V\$SOX_Q6        | SOX                                                 | 23 | 0 |  |  |  | V\$PSX1_01   | PSX1                             | 23 | 0 |
| V\$SP1_02        | Sp1 b.s.                                            | 23 | 0 |  |  |  | V\$PXRXR_01  | RXR half-site                    | 23 | 0 |
| V\$SP1SP3_Q4     | SP1:SP3                                             | 23 | 0 |  |  |  | V\$RAX_01    | rax                              | 23 | 0 |
| V\$SP2_01        | SP2                                                 | 23 | 0 |  |  |  | V\$RHOX11_01 | Rhox11                           | 23 | 0 |
| V\$SP4_Q5        | SP4                                                 | 23 | 0 |  |  |  | V\$S8_02     | S8                               | 23 | 0 |
| V\$SRY_01        | sex-determining region Y gene product               | 23 | 0 |  |  |  | V\$SATB1_01  | Consensus SATB1 Binding Sequence | 23 | 0 |
| V\$STAT1_02      | signal transducer and activator of transcription 1  | 23 | 0 |  |  |  | V\$SHOX2_01  | Shox2                            | 23 | 0 |
| V\$STAT1STAT1_Q3 | STAT1:STAT1                                         | 23 | 0 |  |  |  | V\$SIX1_01   | Six-1                            | 23 | 0 |
| V\$STAT3_02      | signal transducer and activator of transcription 3  | 23 | 0 |  |  |  | V\$SIX2_01   | Six-2                            | 23 | 0 |
| V\$STAT4_01      | signal transducer and activator of transcription 4  | 23 | 0 |  |  |  | V\$SIX3_01   | Six-3                            | 23 | 0 |
| V\$STAT5A_03     | signal transducer and activator of transcription 5a | 23 | 0 |  |  |  | V\$SIX4_01   | six4                             | 23 | 0 |
| V\$STAT6_01      | signal transducer and activator of transcription 6  | 23 | 0 |  |  |  | V\$SIX6_01   | Six-6                            | 23 | 0 |
| V\$TATA_01       | cellular and viral TATA box elements                | 23 | 0 |  |  |  | V\$SOX2_Q6   | SOX2                             | 23 | 0 |
| V\$TCF4_01       | TCF-4                                               | 23 | 0 |  |  |  | V\$SOX4_01   | SOX4                             | 23 | 0 |
| V\$TEF_Q6        | TEF                                                 | 23 | 0 |  |  |  | V\$SOX_Q6    | SOX                              | 23 | 0 |
| V\$TGIF2_01      | TGIF2                                               | 23 | 0 |  |  |  | V\$SP1SP3_Q4 | SP1:SP3                          | 23 | 0 |

|                  |                                         |    |   |  |  |                      |                                                     |    |   |
|------------------|-----------------------------------------|----|---|--|--|----------------------|-----------------------------------------------------|----|---|
| V\$TGIF_02       | TGIF1                                   | 23 | 0 |  |  | V\$SP2_01            | SP2                                                 | 23 | 0 |
| V\$TST1_01       | POU-factor Tst-1/Oct-6                  | 23 | 0 |  |  | V\$SP4_Q5            | SP4                                                 | 23 | 0 |
| V\$UNCX4.1_01    | Uncx-4.1                                | 23 | 0 |  |  | V\$STAT1_02          | signal transducer and activator of transcription 1  | 23 | 0 |
| V\$VAX1_01       | Vax-1                                   | 23 | 0 |  |  | V\$STAT1S<br>TAT1_Q3 | STAT1:STAT1                                         | 23 | 0 |
| V\$VAX2_01       | Vax-2                                   | 23 | 0 |  |  | V\$STAT3_02          | signal transducer and activator of transcription 3  | 23 | 0 |
| V\$VSX1_01       | Vsx1                                    | 23 | 0 |  |  | V\$STAT4_01          | signal transducer and activator of transcription 4  | 23 | 0 |
| V\$ZFP206_01     | Zfp206                                  | 23 | 0 |  |  | V\$STAT5A_03         | signal transducer and activator of transcription 5a | 23 | 0 |
| MA0027.1         | En1                                     | 22 | 0 |  |  | V\$STAT6_01          | signal transducer and activator of transcription 6  | 23 | 0 |
| MA0050.1         | IRF1                                    | 22 | 0 |  |  | V\$TATA_01           | cellular and viral TATA box elements                | 23 | 0 |
| MA0051.1         | IRF2                                    | 22 | 0 |  |  | V\$TCF4_01           | TCF-4                                               | 23 | 0 |
| MA0063.1         | Nkx2-5                                  | 22 | 0 |  |  | V\$TEF_Q6            | TEF                                                 | 23 | 0 |
| MA0076.1         | ELK4                                    | 22 | 0 |  |  | V\$TGIF2_01          | TGIF2                                               | 23 | 0 |
| MA0081.1         | SPIB                                    | 22 | 0 |  |  | V\$TGIF_02           | TGIF1                                               | 23 | 0 |
| MA0113.1         | NR3C1                                   | 22 | 0 |  |  | V\$TST1_01           | POU-factor Tst-1/Oct-6                              | 23 | 0 |
| MA0143.1         | Sox2                                    | 22 | 0 |  |  | V\$UNCX4.1_01        | Uncx-4.1                                            | 23 | 0 |
| MA0152.1         | NFATC2                                  | 22 | 0 |  |  | V\$VAX1_01           | Vax-1                                               | 23 | 0 |
| MA0156.1         | FEV                                     | 22 | 0 |  |  | V\$VAX2_01           | Vax-2                                               | 23 | 0 |
| V\$ALPHACP1_01   | alpha-CP1                               | 22 | 0 |  |  | V\$VSX1_01           | Vsx1                                                | 23 | 0 |
| V\$BLIMP1_Q6     | BLIMP1                                  | 22 | 0 |  |  | V\$ZFP206_01         | Zfp206                                              | 23 | 0 |
| V\$CREBATF_Q6    | CREB, ATF                               | 22 | 0 |  |  | MA0033.1             | FOXL1                                               | 22 | 0 |
| V\$CREBP1CJUN_01 | CRE-binding protein 1:c-Jun heterodimer | 22 | 0 |  |  | MA0050.1             | IRF1                                                | 22 | 0 |
| V\$DMRT7_01      | DMRT7                                   | 22 | 0 |  |  | MA0051.1             | IRF2                                                | 22 | 0 |
| V\$DRI1_01       | DRI1 b.s.                               | 22 | 0 |  |  | MA0080.2             | SPI1                                                | 22 | 0 |
| V\$EHF_01        | EHF                                     | 22 | 0 |  |  | MA0081.1             | SPIB                                                | 22 | 0 |
| V\$FOXJ2_02      | fork head box J 2                       | 22 | 0 |  |  | MA0113.1             | NR3C1                                               | 22 | 0 |

|                 |                                            |    |   |  |  |  |                 |                                     |    |   |
|-----------------|--------------------------------------------|----|---|--|--|--|-----------------|-------------------------------------|----|---|
| V\$FOXO1_02     | fork head box O1                           | 22 | 0 |  |  |  | MA0143.1        | Sox2                                | 22 | 0 |
| V\$FOXO3_01     | fork head box O3                           | 22 | 0 |  |  |  | MA0151.1        | ARID3A                              | 22 | 0 |
| V\$FOXO4_01     | fork head box O4                           | 22 | 0 |  |  |  | MA0152.1        | NFATC2                              | 22 | 0 |
| V\$GAF_Q6       | GAF                                        | 22 | 0 |  |  |  | MA0158.1        | HOXA5                               | 22 | 0 |
| V\$HNF3_Q6_01   | HNF3                                       | 22 | 0 |  |  |  | V\$AFP1_Q6      | AFP1                                | 22 | 0 |
| V\$HNF3B_01     | Hepatocyte Nuclear Factor 3beta            | 22 | 0 |  |  |  | V\$ALPHAC P1_01 | alpha-CP1                           | 22 | 0 |
| V\$ICSBP_Q6     | ICSBP                                      | 22 | 0 |  |  |  | V\$BEN_01       | BEN                                 | 22 | 0 |
| V\$IRF7_01      | interferon regulatory factor 7             | 22 | 0 |  |  |  | V\$BLIMP1_Q6    | BLIMP1                              | 22 | 0 |
| V\$NFAT1_Q6     | NFAT1                                      | 22 | 0 |  |  |  | V\$CEBPB_01     | CCAAT/enhancer binding protein beta | 22 | 0 |
| V\$NFAT2_Q5     | NF-AT2                                     | 22 | 0 |  |  |  | V\$CHCH_01      | Churchill                           | 22 | 0 |
| V\$NFAT3_Q3     | NFAT3                                      | 22 | 0 |  |  |  | V\$CREBAT F_Q6  | CREB, ATF                           | 22 | 0 |
| V\$NFAT_Q4_01   | NF-AT                                      | 22 | 0 |  |  |  | V\$DMRT7_01     | DMRT7                               | 22 | 0 |
| V\$NRF1_Q6      | nuclear respiratory factor 1               | 22 | 0 |  |  |  | V\$E2F1DP2_01   | E2F-1:DP-2 heterodimer              | 22 | 0 |
| V\$PU1_Q4       | PU.1                                       | 22 | 0 |  |  |  | V\$E2F4DP2_01   | E2F-4:DP-2 heterodimer              | 22 | 0 |
| V\$SIRT6_01     | SIRT6                                      | 22 | 0 |  |  |  | V\$EGR_Q6       | Egr                                 | 22 | 0 |
| V\$TR4_01       | TR4                                        | 22 | 0 |  |  |  | V\$EHF_01       | EHF                                 | 22 | 0 |
| V\$UF1H3BETA_Q6 | UF1H3BETA                                  | 22 | 0 |  |  |  | V\$ETS_Q6       | Ets                                 | 22 | 0 |
| V\$YY1_01       | Yin and Yang 1                             | 22 | 0 |  |  |  | V\$FOXO3_01     | fork head box O3                    | 22 | 0 |
| MA0033.1        | FOXL1                                      | 21 | 0 |  |  |  | V\$GAF_Q6       | GAF                                 | 22 | 0 |
| MA0046.1        | HNF1A                                      | 21 | 0 |  |  |  | V\$HFH1_01      | HNF-3/Fkh Homolog 1                 | 22 | 0 |
| V\$ATF_B        | ATF binding site                           | 21 | 0 |  |  |  | V\$HNF3B_01     | Hepatocyte Nuclear Factor 3beta     | 22 | 0 |
| V\$BRCA_01      | BRCA1 containing protein complex with USF2 | 21 | 0 |  |  |  | V\$ICSBP_Q6     | ICSBP                               | 22 | 0 |
| V\$E2F1DP1_01   | E2F-1:DP-1 heterodimer                     | 21 | 0 |  |  |  | V\$IRF7_01      | interferon regulatory factor 7      | 22 | 0 |
| V\$E2F1DP2_01   | E2F-1:DP-2 heterodimer                     | 21 | 0 |  |  |  | V\$IRF_Q6       | IRF                                 | 22 | 0 |
| V\$E2F4DP2_01   | E2F-4:DP-2 heterodimer                     | 21 | 0 |  |  |  | V\$NFAT1_       | NFAT1                               | 22 | 0 |



|                     |                                                       |    |   |  |  |  |                  |                                            |    |   |
|---------------------|-------------------------------------------------------|----|---|--|--|--|------------------|--------------------------------------------|----|---|
| 1                   |                                                       |    |   |  |  |  | Q6               |                                            |    |   |
| V\$E2F_Q2           | E2F                                                   | 21 | 0 |  |  |  | V\$NFAT2_Q5      | NF-AT2                                     | 22 | 0 |
| V\$EGR_Q6           | Egr                                                   | 21 | 0 |  |  |  | V\$NFAT3_Q3      | NFAT3                                      | 22 | 0 |
| V\$FOXO3A_Q1        | FOXO3A                                                | 21 | 0 |  |  |  | V\$NRF1_Q6       | nuclear respiratory factor 1               | 22 | 0 |
| V\$FPM315_01        | Zinc finger protein FPM315 with KRAB and SCAN domains | 21 | 0 |  |  |  | V\$OCT4_01       | Sox2-Oct4 joint motif, in silico predicted | 22 | 0 |
| V\$FREAC7_01        | Fork head RElated ACTivator-7                         | 21 | 0 |  |  |  | V\$POU1F1_Q6     | POU1F1                                     | 22 | 0 |
| V\$HBP1_Q2          | hbp1                                                  | 21 | 0 |  |  |  | V\$PU1_Q4        | PU.1                                       | 22 | 0 |
| V\$HELIOSA_02       | Helios A                                              | 21 | 0 |  |  |  | V\$RNF96_01      | RNF96                                      | 22 | 0 |
| V\$HNF6_Q6          | HNF6                                                  | 21 | 0 |  |  |  | V\$SAP1A_01      | SAP-1a                                     | 22 | 0 |
| V\$HP1SITEFACTOR_Q6 | HP1 site factor                                       | 21 | 0 |  |  |  | V\$SIRT6_01      | SIRT6                                      | 22 | 0 |
| V\$IRF8_Q6          | IRF8                                                  | 21 | 0 |  |  |  | V\$STAT3STAT3_Q3 | STAT3:STAT3                                | 22 | 0 |
| V\$ISRE_01          | interferon-stimulated response element                | 21 | 0 |  |  |  | V\$YY1_01        | Yin and Yang 1                             | 22 | 0 |
| V\$NANOG_02         | Nanog                                                 | 21 | 0 |  |  |  | V\$ZF5_01        | ZF5                                        | 22 | 0 |
| V\$OCT4_01          | Sox2-Oct4 joint motif, in silico predicted            | 21 | 0 |  |  |  | MA0046.1         | HNF1A                                      | 21 | 0 |
| V\$OTX_Q1           | OTX                                                   | 21 | 0 |  |  |  | V\$ATF_B         | ATF binding site                           | 21 | 0 |
| V\$POU1F1_Q6        | POU1F1                                                | 21 | 0 |  |  |  | V\$CTCF_01       | CTCF                                       | 21 | 0 |
| V\$STAT3STAT3_Q3    | STAT3:STAT3                                           | 21 | 0 |  |  |  | V\$E2F1DP1RB_01  | Rb:E2F-1:DP-1 trimeric complex             | 21 | 0 |
| V\$STAT_Q6          | STAT                                                  | 21 | 0 |  |  |  | V\$E2F4DP1_01    | E2F-4:DP-1 heterodimer                     | 21 | 0 |
| V\$ZFP281_01        | Zfp281                                                | 21 | 0 |  |  |  | V\$EFC_Q6        | RFX1 (EF-C)                                | 21 | 0 |
| MA0038.1            | Gfi                                                   | 20 | 0 |  |  |  | V\$FREAC2_01     | Fork head RElated ACTivator-2              | 21 | 0 |
| I\$ANTP_Q6_01       | Antp                                                  | 20 | 0 |  |  |  | V\$FREAC7_01     | Fork head RElated ACTivator-7              | 21 | 0 |
| V\$AFP1_Q6          | AFP1                                                  | 20 | 0 |  |  |  | V\$GATA4_Q3      | GATA-4                                     | 21 | 0 |
| V\$AREB6_04         | AREB6 (Atp1a1 regulatory element binding factor 6)    | 20 | 0 |  |  |  | V\$HNF6_Q6       | HNF6                                       | 21 | 0 |

|                |                               |    |   |  |  |                 |                                                    |    |   |
|----------------|-------------------------------|----|---|--|--|-----------------|----------------------------------------------------|----|---|
| V\$ESE1_Q3     | ESE1                          | 20 | 0 |  |  | V\$ISRE_01      | interferon-stimulated response element             | 21 | 0 |
| V\$FAC1_01     | fetal Alz-50 clone 1          | 20 | 0 |  |  | V\$POU5F1_01    | POU5F1 b.s.                                        | 21 | 0 |
| V\$FREAC2_01   | Fork head RElated ACTivator-2 | 20 | 0 |  |  | V\$PTF1BETA_Q6  | PTF1-beta                                          | 21 | 0 |
| V\$GATA3_Q3    | GATA-binding factor 3         | 20 | 0 |  |  | V\$STAT_Q6      | STAT                                               | 21 | 0 |
| V\$GATA4_Q3    | GATA-4                        | 20 | 0 |  |  | V\$TEL2_Q6      | Tel-2                                              | 21 | 0 |
| V\$GFI1_01     | growth factor independence 1  | 20 | 0 |  |  | V\$TFIIA_Q6     | TFIIA                                              | 21 | 0 |
| V\$GKLF_02     | GKLF (KLF4)                   | 20 | 0 |  |  | MA0038.1        | Gfi                                                | 20 | 0 |
| V\$HFH1_01     | HNF-3/Fkh Homolog 1           | 20 | 0 |  |  | I\$ANTP_Q6_01   | Antp                                               | 20 | 0 |
| V\$POU5F1_01   | POU5F1 b.s.                   | 20 | 0 |  |  | V\$AIRE_01      | AIRE                                               | 20 | 0 |
| V\$PTF1BETA_Q6 | PTF1-beta                     | 20 | 0 |  |  | V\$ATF1_Q6      | ATF1                                               | 20 | 0 |
| V\$TEL2_Q6     | Tel-2                         | 20 | 0 |  |  | V\$CREBP1_Q2    | CRE-binding protein 1                              | 20 | 0 |
| V\$TFIIA_Q6    | TFIIA                         | 20 | 0 |  |  | V\$ETS2_Q6      | ETS2                                               | 20 | 0 |
| MA0040.1       | Foxq1                         | 19 | 0 |  |  | V\$FAC1_01      | fetal Alz-50 clone 1                               | 20 | 0 |
| MA0158.1       | HOXA5                         | 19 | 0 |  |  | V\$GATA3_Q3     | GATA-binding factor 3                              | 20 | 0 |
| V\$AIRE_01     | AIRE                          | 19 | 0 |  |  | V\$MRF2_01      | modulator recognition factor 2                     | 20 | 0 |
| V\$CREBP1_Q2   | CRE-binding protein 1         | 19 | 0 |  |  | V\$SOX9_B1      | SOX (SRY-related HMG box)                          | 20 | 0 |
| V\$GR_Q6       | glucocorticoid receptor       | 19 | 0 |  |  | V\$UF1H3BETA_Q6 | UF1H3BETA                                          | 20 | 0 |
| V\$POU3F2_02   | POU3F2                        | 19 | 0 |  |  | MA0018.2        | CREB1                                              | 19 | 0 |
| V\$SAP1A_01    | SAP-1a                        | 19 | 0 |  |  | MA0040.1        | Foxq1                                              | 19 | 0 |
| V\$TAL1_01     | Tal-1 (Sci)                   | 19 | 0 |  |  | MA0087.1        | Sox5                                               | 19 | 0 |
| MA0018.2       | CREB1                         | 18 | 0 |  |  | V\$AREB6_Q4     | AREB6 (Atp1a1 regulatory element binding factor 6) | 19 | 0 |
| MA0030.1       | FOXF2                         | 18 | 0 |  |  | V\$ATF3_Q6      | activating transcription factor 3                  | 19 | 0 |
| MA0031.1       | FOXD1                         | 18 | 0 |  |  | V\$GATA_C       | GATA binding site                                  | 19 | 0 |
| MA0135.1       | Lhx3                          | 18 | 0 |  |  | V\$GFI1_01      | growth factor independence 1                       | 19 | 0 |

|                 |                                          |    |   |  |  |  |                 |                                                  |    |   |
|-----------------|------------------------------------------|----|---|--|--|--|-----------------|--------------------------------------------------|----|---|
| MA0142.1        | Pou5f1                                   | 18 | 0 |  |  |  | V\$HNF3ALPHA_Q6 | HNF3alpha                                        | 19 | 0 |
| V\$ATF1_Q6      | ATF1                                     | 18 | 0 |  |  |  | V\$IRF8_Q6      | IRF8                                             | 19 | 0 |
| V\$ATF3_Q6      | activating transcription factor 3        | 18 | 0 |  |  |  | V\$ISL1_Q6      | ISL1                                             | 19 | 0 |
| V\$CIZ_01       | CIZ (Cas-associated zinc finger protein) | 18 | 0 |  |  |  | V\$TR4_01       | TR4                                              | 19 | 0 |
| V\$E2F1DP1RB_01 | Rb:E2F-1:DP-1 trimeric complex           | 18 | 0 |  |  |  | V\$ZFP281_01    | Zfp281                                           | 19 | 0 |
| V\$HNF3ALPHA_Q6 | HNF3alpha                                | 18 | 0 |  |  |  | V\$TFEB_01      | TFEB                                             | 19 | 1 |
| V\$KLF15_Q2     | KLF15                                    | 18 | 0 |  |  |  | MA0030.1        | FOXF2                                            | 18 | 0 |
| V\$RNF96_01     | RNF96                                    | 18 | 0 |  |  |  | MA0031.1        | FOXD1                                            | 18 | 0 |
| V\$SMAD1_01     | SMAD1                                    | 18 | 0 |  |  |  | MA0075.1        | Prrx2                                            | 18 | 0 |
| V\$SOX9_B1      | SOX (SRY-related HMG box)                | 18 | 0 |  |  |  | MA0125.1        | Nobox                                            | 18 | 0 |
| V\$TFEB_01      | TFEB                                     | 18 | 0 |  |  |  | MA0135.1        | Lhx3                                             | 18 | 0 |
| MA0101.1        | REL                                      | 17 | 0 |  |  |  | V\$FOXD3_01     | fork head box D3                                 | 18 | 0 |
| MA0144.1        | Stat3                                    | 17 | 0 |  |  |  | V\$FREAC3_01    | Fork head RElated ACTivator-3                    | 18 | 0 |
| V\$AR_Q2        | androgen receptor                        | 17 | 0 |  |  |  | V\$HSF2_01      | heat shock factor 2                              | 18 | 0 |
| V\$E2F4DP1_01   | E2F-4:DP-1 heterodimer                   | 17 | 0 |  |  |  | V\$HSF_Q6       | HSF                                              | 18 | 0 |
| V\$EAR2_Q2      | EAR2                                     | 17 | 0 |  |  |  | V\$POU3F2_02    | POU3F2                                           | 18 | 0 |
| V\$FOX_Q2       | FOX factors                              | 17 | 0 |  |  |  | V\$SMAD1_01     | SMAD1                                            | 18 | 0 |
| V\$FREAC3_01    | Fork head RElated ACTivator-3            | 17 | 0 |  |  |  | V\$STAF_01      | Se-Cys tRNA gene transcription activating factor | 18 | 0 |
| V\$GATA_C       | GATA binding site                        | 17 | 0 |  |  |  | V\$ZNF333_01    | ZNF333                                           | 18 | 0 |
| V\$HSF1_01      | heat shock factor 1                      | 17 | 0 |  |  |  | MA0142.1        | Pou5f1                                           | 17 | 0 |
| V\$HSF2_01      | heat shock factor 2                      | 17 | 0 |  |  |  | V\$AR_Q2        | androgen receptor                                | 17 | 0 |
| V\$HSF_Q6       | HSF                                      | 17 | 0 |  |  |  | V\$CIZ_01       | CIZ (Cas-associated zinc finger protein)         | 17 | 0 |
| V\$NERF_Q2      | new ets-related factor 1a                | 17 | 0 |  |  |  | V\$DMRT4_01     | DMRT4                                            | 17 | 0 |
| V\$FOXD3_01     | fork head box D3                         | 17 | 1 |  |  |  | V\$ESE1_Q3      | ESE1                                             | 17 | 0 |
| V\$ATF5_01      | ATF5 binding site                        | 16 | 0 |  |  |  | V\$GR_Q6        | glucocorticoid receptor                          | 17 | 0 |

|               |                                                     |    |   |  |  |  |                 |                                                        |    |   |
|---------------|-----------------------------------------------------|----|---|--|--|--|-----------------|--------------------------------------------------------|----|---|
| V\$CEBPE_01   | cebpe                                               | 16 | 0 |  |  |  | MA0109.1        | Hltf                                                   | 16 | 0 |
| V\$DMRT4_01   | DMRT4                                               | 16 | 0 |  |  |  | V\$CEBPDELTA_Q6 | C/EBPdelta                                             | 16 | 0 |
| V\$HMEF2_Q6   | myocyte enhancer factor                             | 16 | 0 |  |  |  | V\$FOX_Q2       | FOX factors                                            | 16 | 0 |
| V\$NFKB_Q6_01 | NF-kappaB                                           | 16 | 0 |  |  |  | V\$FPM315_01    | Zinc finger protein FPM315 with KRAB and SCAN domains  | 16 | 0 |
| V\$SOX5_01    | Sox-5                                               | 16 | 0 |  |  |  | V\$HNF8_01      | HNF-3/Fkh Homolog-8                                    | 16 | 0 |
| V\$WT1_Q6     | WT1                                                 | 16 | 0 |  |  |  | V\$HSF1_01      | heat shock factor 1                                    | 16 | 0 |
| MA0056.1      | MZF1_1-4                                            | 15 | 0 |  |  |  | V\$Ikaros_01    | Ikaros 1                                               | 16 | 0 |
| MA0125.1      | Nobox                                               | 15 | 0 |  |  |  | V\$RUSH1A_02    | RUSH-1alpha                                            | 16 | 0 |
| V\$CREL_01    | c-Rel                                               | 15 | 0 |  |  |  | V\$CEBPE_01     | cebpe                                                  | 15 | 0 |
| V\$Ikaros_01  | Ikaros 1                                            | 15 | 0 |  |  |  | V\$FOXM1_01     | FOXM1                                                  | 15 | 0 |
| V\$MRF2_01    | modulator recognition factor 2                      | 15 | 0 |  |  |  | V\$GATA1_05     | GATA-binding factor 1                                  | 15 | 0 |
| V\$ZNF333_01  | ZNF333                                              | 15 | 0 |  |  |  | V\$HMEF2_Q6     | myocyte enhancer factor                                | 15 | 0 |
| V\$AP1_Q6     | activator protein 1                                 | 14 | 0 |  |  |  | V\$HNF4_01      | hepatic nuclear factor 4                               | 15 | 0 |
| V\$EFC_Q6     | RFX1 (EF-C)                                         | 14 | 0 |  |  |  | V\$STRA13_01    | Stra13                                                 | 15 | 0 |
| V\$FRA1_Q5    | FRA1                                                | 14 | 0 |  |  |  | V\$ZABC1_01     | ZABC1 b.s.                                             | 15 | 0 |
| V\$HNF4_01    | hepatic nuclear factor 4                            | 14 | 0 |  |  |  | MA0041.1        | Foxd3                                                  | 15 | 1 |
| V\$MZF1_01    | MZF1                                                | 14 | 0 |  |  |  | MA0101.1        | REL                                                    | 14 | 0 |
| V\$PLZF_02    | PLZF                                                | 14 | 0 |  |  |  | MA0144.1        | Stat3                                                  | 14 | 0 |
| V\$RSRFC4_01  | related to serum response factor, C4                | 14 | 0 |  |  |  | V\$EAR2_Q2      | EAR2                                                   | 14 | 0 |
| V\$STAF_01    | Se-Cys tRNA gene transcription activating factor    | 14 | 0 |  |  |  | V\$PLZF_02      | PLZF                                                   | 14 | 0 |
| V\$STAT5B_01  | signal transducer and activator of transcription 5b | 14 | 0 |  |  |  | V\$RFX1_02      | X-box binding protein RFX1                             | 14 | 0 |
| V\$STRA13_01  | Stra13                                              | 14 | 0 |  |  |  | V\$RSRFC4_01    | related to serum response factor, C4                   | 14 | 0 |
| V\$ZF5_01     | ZF5                                                 | 14 | 0 |  |  |  | V\$TAL1_01      | Tal-1 (Scf)                                            | 14 | 0 |
| MA0014.1      | Pax5                                                | 13 | 0 |  |  |  | V\$VBP_01       | PAR-type chicken vitellogenin promoter-binding protein | 14 | 0 |

|                  |                                                        |    |   |  |  |  |                 |                                                     |    |   |
|------------------|--------------------------------------------------------|----|---|--|--|--|-----------------|-----------------------------------------------------|----|---|
| MA0107.1         | RELA                                                   | 13 | 0 |  |  |  | MA0014.1        | Pax5                                                | 13 | 0 |
| V\$HFH8_01       | HNF-3/Fkh Homolog-8                                    | 13 | 0 |  |  |  | MA0025.1        | NFIL3                                               | 13 | 0 |
| V\$ISL1_Q6       | ISL1                                                   | 13 | 0 |  |  |  | MA0093.1        | USF1                                                | 13 | 0 |
| V\$RFX1_02       | X-box binding protein RFX1                             | 13 | 0 |  |  |  | V\$FOXJ3_01     | foxj3                                               | 13 | 0 |
| V\$ZABC1_01      | ZABC1 b.s.                                             | 13 | 0 |  |  |  | V\$HNF4ALPHA_Q6 | HNF4alpha                                           | 13 | 0 |
| MA0041.1         | Foxd3                                                  | 13 | 1 |  |  |  | V\$MECP2_02     | MECP2 b.s.                                          | 13 | 0 |
| V\$TCF3_01       | TCF-3                                                  | 13 | 2 |  |  |  | V\$USF_01       | upstream stimulating factor                         | 13 | 0 |
| MA0087.1         | Sox5                                                   | 12 | 0 |  |  |  | V\$TCF3_01      | TCF-3                                               | 13 | 2 |
| MA0109.1         | Hltf                                                   | 12 | 0 |  |  |  | MA0004.1        | Arnt                                                | 12 | 0 |
| V\$AP1FJ_Q2      | activator protein 1                                    | 12 | 0 |  |  |  | MA0043.1        | HLF                                                 | 12 | 0 |
| V\$CEBPDELTA_Q6  | C/EBPdelta                                             | 12 | 0 |  |  |  | MA0124.1        | NKX3-1                                              | 12 | 0 |
| V\$FOXJ3_01      | foxj3                                                  | 12 | 0 |  |  |  | V\$ATF5_01      | ATF5 binding site                                   | 12 | 0 |
| V\$FOXM1_01      | FOXM1                                                  | 12 | 0 |  |  |  | V\$CREL_01      | c-Rel                                               | 12 | 0 |
| V\$NFKAPPAB65_01 | NF-kappaB (p65)                                        | 12 | 0 |  |  |  | V\$RFX3_01      | RFX3 dimer                                          | 12 | 0 |
| V\$RUSH1A_02     | RUSH-1alpha                                            | 12 | 0 |  |  |  | V\$TCF11_01     | TCF11/KCR-F1/Nrf1 homodimers                        | 12 | 0 |
| MA0075.1         | Prrx2                                                  | 12 | 1 |  |  |  | MA0042.1        | FOXI1                                               | 11 | 0 |
| MA0052.1         | MEF2A                                                  | 11 | 0 |  |  |  | MA0058.1        | MAX                                                 | 11 | 0 |
| V\$LBP1_Q6       | LBP-1                                                  | 11 | 0 |  |  |  | MA0162.1        | Egr1                                                | 11 | 0 |
| V\$LEF1_Q2_01    | LEF1                                                   | 11 | 0 |  |  |  | V\$AP2GAMMA_01  | AP-2gamma                                           | 11 | 0 |
| V\$NF1_Q6_01     | NF-1                                                   | 11 | 0 |  |  |  | V\$E4BP4_01     | E4BP4                                               | 11 | 0 |
| V\$RFX3_01       | RFX3 dimer                                             | 11 | 0 |  |  |  | V\$HNF3A_01     | FOXA1                                               | 11 | 0 |
| V\$SRF_Q5_02     | SRF                                                    | 11 | 0 |  |  |  | V\$KLF15_Q2     | KLF15                                               | 11 | 0 |
| V\$VBP_01        | PAR-type chicken vitellogenin promoter-binding protein | 11 | 0 |  |  |  | V\$STAT5B_01    | signal transducer and activator of transcription 5b | 11 | 0 |
| MA0025.1         | NFIL3                                                  | 10 | 0 |  |  |  | V\$WHN_B        | winged-helix factor nude                            | 11 | 0 |
| MA0148.1         | FOXA1                                                  | 10 | 0 |  |  |  | MA0052.1        | MEF2A                                               | 10 | 0 |

|                  |                                                       |    |   |  |  |  |                   |                                                       |    |   |
|------------------|-------------------------------------------------------|----|---|--|--|--|-------------------|-------------------------------------------------------|----|---|
| V\$DMRT2_01      | DMRT2                                                 | 10 | 0 |  |  |  | V\$DMRT2_01       | DMRT2                                                 | 10 | 0 |
| V\$GATA1_05      | GATA-binding factor 1                                 | 10 | 0 |  |  |  | V\$LEF1_Q2_01     | LEF1                                                  | 10 | 0 |
| V\$HNF3A_01      | FOXA1                                                 | 10 | 0 |  |  |  | V\$NERF_Q2        | new ets-related factor 1a                             | 10 | 0 |
| V\$HNF4ALPHA_Q6  | HNF4alpha                                             | 10 | 0 |  |  |  | V\$NFKB_Q6_01     | NF-kappaB                                             | 10 | 0 |
| V\$HTF_01        | HTF                                                   | 10 | 0 |  |  |  | V\$RBPJK_01       | RBP-Jkappa                                            | 10 | 0 |
| V\$MAZR_01       | MAZ related factor                                    | 10 | 0 |  |  |  | MA0107.1          | RELA                                                  | 9  | 0 |
| V\$PR_01         | high affinity binding sites for progesterone receptor | 10 | 0 |  |  |  | MA0148.1          | FOXA1                                                 | 9  | 0 |
| V\$TCF11_01      | TCF11/KCR-F1/Nrf1 homodimers                          | 10 | 0 |  |  |  | V\$E4F1_Q6        | E4F1                                                  | 9  | 0 |
| V\$USF_01        | upstream stimulating factor                           | 10 | 0 |  |  |  | V\$HTF_01         | HTF                                                   | 9  | 0 |
| MA0004.1         | Arnt                                                  | 9  | 0 |  |  |  | V\$NF1_Q6_01      | NF-1                                                  | 9  | 0 |
| MA0042.1         | FOX11                                                 | 9  | 0 |  |  |  | V\$NFKAPP_AB65_01 | NF-kappaB (p65)                                       | 9  | 0 |
| MA0140.1         | Tal1::Gata1                                           | 9  | 0 |  |  |  | V\$PR_01          | high affinity binding sites for progesterone receptor | 9  | 0 |
| V\$AP2GAMMA_A_01 | AP-2gamma                                             | 9  | 0 |  |  |  | MA0132.1          | Pdx1                                                  | 9  | 1 |
| V\$E4BP4_01      | E4BP4                                                 | 9  | 0 |  |  |  | MA0006.1          | Arnt::Ahr                                             | 8  | 0 |
| V\$HLF_01        | hepatic leukemia factor                               | 9  | 0 |  |  |  | MA0047.2          | Foxa2                                                 | 8  | 0 |
| V\$RBPJK_Q4      | RBP-Jkappa                                            | 9  | 0 |  |  |  | MA0140.1          | Tal1::Gata1                                           | 8  | 0 |
| MA0055.1         | Myf                                                   | 8  | 0 |  |  |  | MA0164.1          | Nr2e3                                                 | 8  | 0 |
| MA0093.1         | USF1                                                  | 8  | 0 |  |  |  | V\$DMRT5_01       | DMRT5                                                 | 8  | 0 |
| V\$CHX10_01      | CHX10                                                 | 8  | 0 |  |  |  | V\$GATA6_01       | GATA-6                                                | 8  | 0 |
| V\$NEUROD_02     | NeuroD                                                | 8  | 0 |  |  |  | V\$MYB_Q5_01      | MYB                                                   | 8  | 0 |
| V\$PAX3_B        | Pax-3 binding sites                                   | 8  | 0 |  |  |  | V\$REX1_03        | REX1                                                  | 8  | 0 |
| MA0003.1         | TFAP2A                                                | 7  | 0 |  |  |  | MA0029.1          | Evi1                                                  | 7  | 0 |
| MA0029.1         | Evi1                                                  | 7  | 0 |  |  |  | MA0056.1          | MZF1_1-4                                              | 7  | 0 |
| MA0047.2         | Foxa2                                                 | 7  | 0 |  |  |  | MA0088.1          | znf143                                                | 7  | 0 |
| MA0057.1         | MZF1_5-13                                             | 7  | 0 |  |  |  | V\$GATA2_Q2       | GATA-binding factor 2                                 | 7  | 0 |

|                     |                                  |   |   |  |  |                    |                                              |   |   |
|---------------------|----------------------------------|---|---|--|--|--------------------|----------------------------------------------|---|---|
| MA0088.1            | znf143                           | 7 | 0 |  |  | V\$PAX3_B          | Pax-3 binding sites                          | 7 | 0 |
| MA0162.1            | Egr1                             | 7 | 0 |  |  | V\$ZFX_01          | Zfx                                          | 7 | 0 |
| V\$AP2ALPHA_01      | AP-2alpha                        | 7 | 0 |  |  | V\$WT1_Q6          | WT1                                          | 7 | 1 |
| V\$GATA2_02         | GATA-binding factor 2            | 7 | 0 |  |  | MA0003.1           | TFAP2A                                       | 6 | 0 |
| V\$MAF_Q6           | MAF                              | 7 | 0 |  |  | V\$AP2ALPHA_01     | AP-2alpha                                    | 6 | 0 |
| V\$MECP2_02         | MECP2 b.s.                       | 7 | 0 |  |  | V\$CHX10_01        | CHX10                                        | 6 | 0 |
| V\$P50RELAP65_Q5_01 | P50:RELA-P65                     | 7 | 0 |  |  | V\$LEF1TCF1_Q4     | LEF1, TCF1                                   | 6 | 0 |
| MA0061.1            | NF-kappaB                        | 6 | 0 |  |  | V\$MEIS1B_HOXA9_02 | Meis-1b:HOXA9 heterodimeric binding          | 6 | 0 |
| V\$DMRT5_01         | DMRT5                            | 6 | 0 |  |  | V\$MZF1_01         | MZF1                                         | 6 | 0 |
| V\$EBF_Q6           | EBF                              | 6 | 0 |  |  | V\$SRF_03          | SRF b.s.                                     | 6 | 0 |
| V\$HFH3_01          | HFH-3 (HNF3/fork head homolog 3) | 6 | 0 |  |  | F\$AMT1_Q2         | AMT1                                         | 5 | 0 |
| V\$MIF1_01          | MIBP-1 / RFX1 complex            | 6 | 0 |  |  | V\$DMRT3_01        | DMRT3                                        | 5 | 0 |
| V\$NFE2_01          | NF-E2 p45                        | 6 | 0 |  |  | V\$FREAC4_01       | Fork head RElated ACTivator-4                | 5 | 0 |
| V\$RELBP52_01       | kappaB site                      | 6 | 0 |  |  | V\$MAF_Q6          | MAF                                          | 5 | 0 |
| V\$WHN_B            | winged-helix factor nude         | 6 | 0 |  |  | V\$MAZR_01         | MAZ related factor                           | 5 | 0 |
| V\$ZNF219_01        | ZNF219                           | 6 | 0 |  |  | V\$MEIS1A_HOXA9_01 | Meis-1a:HOXA9 heterodimeric binding          | 5 | 0 |
| MA0006.1            | Arnt::Ahr                        | 5 | 0 |  |  | V\$NFMUE1_Q6       | NF-muE1                                      | 5 | 0 |
| MA0058.1            | MAX                              | 5 | 0 |  |  | V\$TTF1_Q3         | TTF-1, TTF1 (thyroid transcription factor 1) | 5 | 0 |
| MA0114.1            | HNF4A                            | 5 | 0 |  |  | MA0061.1           | NF-kappaB                                    | 4 | 0 |
| MA0164.1            | Nr2e3                            | 5 | 0 |  |  | MA0067.1           | Pax2                                         | 4 | 0 |
| F\$AMT1_Q2          | AMT1                             | 5 | 0 |  |  | V\$AP1_Q2          | activator protein 1                          | 4 | 0 |
| V\$DMRT3_01         | DMRT3                            | 5 | 0 |  |  | V\$CLOCKB_MAL_Q6   | CLOCK:BMAL                                   | 4 | 0 |
| V\$E4F1_Q6          | E4F1                             | 5 | 0 |  |  | V\$DAX1_01         | Dax1                                         | 4 | 0 |
| V\$FREAC4_01        | Fork head RElated ACTivator-4    | 5 | 0 |  |  | V\$HFH3_01         | HFH-3 (HNF3/fork head homolog 3)             | 4 | 0 |
| V\$LEF1TCF1_        | LEF1, TCF1                       | 5 | 0 |  |  | V\$MIF1_01         | MIBP-1 / RFX1 complex                        | 4 | 0 |

|                         |                                     |   |   |  |  |  |  |                  |                                     |   |   |  |  |
|-------------------------|-------------------------------------|---|---|--|--|--|--|------------------|-------------------------------------|---|---|--|--|
| Q4                      |                                     |   |   |  |  |  |  |                  |                                     |   |   |  |  |
| V\$MEIS1AHOXA9_01       | Meis-1a:HOXA9 heterodimeric binding | 5 | 0 |  |  |  |  | V\$MIZF_01       | MIZF                                | 4 | 0 |  |  |
| V\$NFKAPPAB_01          | NF-kappaB                           | 5 | 0 |  |  |  |  | V\$NFKAPPAB_01   | NF-kappaB                           | 4 | 0 |  |  |
| V\$PBX_Q3               | Pbx                                 | 5 | 0 |  |  |  |  | V\$NRSE_B        | neural-restrictive-silencer-element | 4 | 0 |  |  |
| V\$REX1_03              | REX1                                | 5 | 0 |  |  |  |  | V\$PBX_Q3        | Pbx                                 | 4 | 0 |  |  |
| MA0035.2                | Gata1                               | 4 | 0 |  |  |  |  | V\$RELB5_2_01    | kappaB site                         | 4 | 0 |  |  |
| MA0065.2                | PPARG::RXRA                         | 4 | 0 |  |  |  |  | V\$HMG2_01       | HMGA2 binding site                  | 4 | 0 |  |  |
| V\$DAX1_01              | Dax1                                | 4 | 0 |  |  |  |  | V\$LBP1_Q6       | LBP-1                               | 4 | 1 |  |  |
| V\$GATA6_01             | GATA-6                              | 4 | 0 |  |  |  |  | MA0017.1         | NR2F1                               | 3 | 0 |  |  |
| V\$MIZF_01              | MIZF                                | 4 | 0 |  |  |  |  | MA0069.1         | Pax6                                | 3 | 0 |  |  |
| V\$MYCMA_X_03           | c-Myc:Max heterodimer               | 4 | 0 |  |  |  |  | MA0104.2         | Mycn                                | 3 | 0 |  |  |
| V\$NRSE_B               | neural-restrictive-silencer-element | 4 | 0 |  |  |  |  | MA0138.2         | REST                                | 3 | 0 |  |  |
| V\$P50P50_Q3            | P50:P50                             | 4 | 0 |  |  |  |  | V\$AP1F_Q2       | activator protein 1                 | 3 | 0 |  |  |
| V\$TFII_Q6              | TFII-I                              | 4 | 1 |  |  |  |  | V\$COUP_01       | COUP-TF, HNF-4                      | 3 | 0 |  |  |
| MA0132.1                | Pdx1                                | 4 | 2 |  |  |  |  | V\$DEAF1_01      | DEAF1                               | 3 | 0 |  |  |
| V\$CACBINDINGPROTEIN_Q6 | CAC-binding protein                 | 4 | 4 |  |  |  |  | V\$EBF_Q6        | EBF                                 | 3 | 0 |  |  |
| MA0017.1                | NR2F1                               | 3 | 0 |  |  |  |  | V\$MYCMA_X_01    | c-Myc:Max heterodimer               | 3 | 0 |  |  |
| MA0069.1                | Pax6                                | 3 | 0 |  |  |  |  | V\$PNR_01        | PNR                                 | 3 | 0 |  |  |
| MA0104.2                | Mycn                                | 3 | 0 |  |  |  |  | V\$SOX17_01      | half-site                           | 3 | 0 |  |  |
| MA0124.1                | NKX3-1                              | 3 | 0 |  |  |  |  | V\$TCF11M_AFG_01 | TCF11:MafG heterodimers             | 3 | 0 |  |  |
| V\$COUP_01              | COUP-TF, HNF-4                      | 3 | 0 |  |  |  |  | V\$XBP1_01       | X-box-binding protein 1             | 3 | 0 |  |  |
| V\$DR1_Q3               | Direct repeat 1                     | 3 | 0 |  |  |  |  | MA0048.1         | NHLH1                               | 2 | 0 |  |  |
| V\$GFI1B_01             | Gfi1b                               | 3 | 0 |  |  |  |  | MA0057.1         | MZF1_5-13                           | 2 | 0 |  |  |
| V\$LTF_Q6               | LTF                                 | 3 | 0 |  |  |  |  | MA0059.1         | MYC::MAX                            | 2 | 0 |  |  |



|                   |                                              |   |        |  |  |                      |                                                  |   |   |
|-------------------|----------------------------------------------|---|--------|--|--|----------------------|--------------------------------------------------|---|---|
| V\$MOVOB_01       | MOVO-B                                       | 3 | 0      |  |  | MA0114.1             | HNF4A                                            | 2 | 0 |
| V\$MYB_Q5_01      | MYB                                          | 3 | 0      |  |  | MA0115.1             | NR1H2::RXRA                                      | 2 | 0 |
| V\$NFMUE1_Q6      | NF-muE1                                      | 3 | 0      |  |  | V\$AP3_Q6            | AP-3                                             | 2 | 0 |
| V\$NRSF_01        | neuron-restrictive silencer factor           | 3 | 0      |  |  | V\$ATF6_01           | activating transcription factor 6                | 2 | 0 |
| V\$PXR_Q2         | half-site matrix                             | 3 | 0      |  |  | V\$CDPCR3_01         | cut-like homeodomain protein                     | 2 | 0 |
| V\$TTF1_Q3        | TTF-1, TTF1 (thyroid transcription factor 1) | 3 | 0      |  |  | V\$DR3_Q4            | direct repeat 3                                  | 2 | 0 |
| V\$ZBED6_01       | ZBED6                                        | 3 | 0      |  |  | V\$EGR2_01           | Egr-2/Krox-20 early growth response gene product | 2 | 0 |
| V\$SMAD3_Q6       | SMAD3                                        | 3 | 1      |  |  | V\$FOXP1_01          | FOXP1                                            | 2 | 0 |
| V\$P300_01        | p300                                         | 3 | 2      |  |  | V\$GFI1B_01          | Gfi1b                                            | 2 | 0 |
| V\$RPC155_01      | RPC155                                       | 3 | 1<br>6 |  |  | V\$LTF_Q6            | LTF                                              | 2 | 0 |
| MA0067.1          | Pax2                                         | 2 | 0      |  |  | V\$MYOGN_F1_01       | myogenin / nuclear factor 1 or related factors   | 2 | 0 |
| MA0078.1          | Sox17                                        | 2 | 0      |  |  | V\$NGFIC_01          | nerve growth factor-induced protein C            | 2 | 0 |
| MA0115.1          | NR1H2::RXRA                                  | 2 | 0      |  |  | V\$NRSF_01           | neuron-restrictive silencer factor               | 2 | 0 |
| V\$CLOCKBMAL_Q6   | CLOCK:BMAL                                   | 2 | 0      |  |  | V\$OLF1_01           | olfactory neuron-specific factor                 | 2 | 0 |
| V\$DR3_Q4         | direct repeat 3                              | 2 | 0      |  |  | V\$P50REL_AP65_Q5_01 | P50:RELA-P65                                     | 2 | 0 |
| V\$EGR3_01        | early growth response gene 3 product         | 2 | 0      |  |  | V\$PPAR_DR1_Q2       | PPAR direct repeat 1                             | 2 | 0 |
| V\$FOXP1_01       | FOXP1                                        | 2 | 0      |  |  | V\$PPARA_01          | PPAR:RXR heterodimers                            | 2 | 0 |
| V\$FXR_IR1_Q6     | FXR inverted repeat 1                        | 2 | 0      |  |  | V\$TAXCREB_02        | Tax/CREB complex                                 | 2 | 0 |
| V\$HEN1_02        | HEN1                                         | 2 | 0      |  |  | V\$TBX18_01          | T-box 18                                         | 2 | 0 |
| V\$HFH4_01        | HFH4 (FOXJ1)                                 | 2 | 0      |  |  | V\$ZNF219_01         | ZNF219                                           | 2 | 0 |
| V\$IK3_01         | Ikaros 3                                     | 2 | 0      |  |  | V\$P300_01           | p300                                             | 2 | 3 |
| V\$MEIS1BHOXA9_02 | Meis-1b:HOXA9 heterodimeric binding          | 2 | 0      |  |  | MA0007.1             | Ar                                               | 1 | 0 |
| V\$MYOGNF1        | myogenin / nuclear factor 1                  | 2 | 0      |  |  | MA0035.2             | Gata1                                            | 1 | 0 |

|                 |                                          |   |   |   |  |  |  |                  |                                               |   |   |
|-----------------|------------------------------------------|---|---|---|--|--|--|------------------|-----------------------------------------------|---|---|
| _01             | or related factors                       |   |   |   |  |  |  |                  |                                               |   |   |
| V\$NGFIC_01     | nerve growth factor-induced protein C    | 2 | 0 |   |  |  |  | MA0078.1         | Sox17                                         | 1 | 0 |
| V\$OLF1_01      | olfactory neuron-specific factor         | 2 | 0 |   |  |  |  | MA0116.1         | Zfp423                                        | 1 | 0 |
| V\$REST_01      | NRSF, neuron-restrictive silencer factor | 2 | 0 |   |  |  |  | MA0147.1         | Myc                                           | 1 | 0 |
| V\$SP3_Q3       | Sp3                                      | 2 | 0 |   |  |  |  | V\$ATF4_Q2       | activating transcription factor 4             | 1 | 0 |
| V\$TBX15_02     | T-box 15                                 | 2 | 0 |   |  |  |  | V\$CDPCR3HD_01   | cut-like homeodomain protein                  | 1 | 0 |
| V\$TCF11MAFG_01 | TCF11:MafG heterodimers                  | 2 | 0 |   |  |  |  | V\$DMRT1_01      | DMRT1                                         | 1 | 0 |
| V\$ZFX_01       | Zfx                                      | 2 | 0 |   |  |  |  | V\$DR1_Q3        | Direct repeat 1                               | 1 | 0 |
| V\$BACH1_01     | BTB and CNC homolog 1                    | 2 | 1 |   |  |  |  | V\$EGR3_01       | early growth response gene 3 product          | 1 | 0 |
| V\$BACH2_01     | BTB and CNC homolog 2                    | 2 | 1 |   |  |  |  | V\$FXR_IR1_Q6    | FXR inverted repeat 1                         | 1 | 0 |
| V\$CACD_01      | CACD                                     | 2 | 2 |   |  |  |  | V\$GCNF_01       | GCNF (germ cell nuclear factor)               | 1 | 0 |
| V\$LYF1_01      | LyF-1                                    | 2 | 2 | 0 |  |  |  | V\$GRE_C         | Glucocorticoid response element               | 1 | 0 |
| V\$IK_Q5        | Ikaros                                   | 2 | 2 | 1 |  |  |  | V\$GZF1_01       | plays a role in renal branching morphogenesis | 1 | 0 |
| MA0007.1        | Ar                                       | 1 | 0 |   |  |  |  | V\$HAND1E47_01   | Hand1:E47 heterodimer                         | 1 | 0 |
| MA0048.1        | NHLH1                                    | 1 | 0 |   |  |  |  | V\$HEN1_02       | HEN1                                          | 1 | 0 |
| MA0059.1        | MYC::MAX                                 | 1 | 0 |   |  |  |  | V\$HFH4_01       | HFH4 (FOXJ1)                                  | 1 | 0 |
| MA0117.1        | Mafb                                     | 1 | 0 |   |  |  |  | V\$IK3_01        | Ikaros 3                                      | 1 | 0 |
| MA0154.1        | EBF1                                     | 1 | 0 |   |  |  |  | V\$NEUROD_02     | NeuroD                                        | 1 | 0 |
| MA0159.1        | RXR::RAR_DR5                             | 1 | 0 |   |  |  |  | V\$NFE2_01       | NF-E2 p45                                     | 1 | 0 |
| V\$AP3_Q6       | AP-3                                     | 1 | 0 |   |  |  |  | V\$NFKAPPAB50_01 | NF-kappaB (p50)                               | 1 | 0 |
| V\$ATF4_Q2      | activating transcription factor 4        | 1 | 0 |   |  |  |  | V\$NMYC_01       | N-Myc                                         | 1 | 0 |
| V\$ATF6_01      | activating transcription factor 6        | 1 | 0 |   |  |  |  | V\$NUR77_Q5      | NUR77                                         | 1 | 0 |
| V\$DEAF1_01     | DEAF1                                    | 1 | 0 |   |  |  |  | V\$P50P50_Q3     | P50:P50                                       | 1 | 0 |
| V\$GRE_C        | Glucocorticoid response                  | 1 | 0 |   |  |  |  | V\$PAX1_B        | Pax-1 binding sites                           | 1 | 0 |



**Supplementary Table V.** Clover results indicate the number of chromosomes with transcription factor binding motifs statistically over-represented in REP DHS within intergenic sequence (more than 2kb outside of any gene). Analysis was divided into three groups (all DHS, REP-selective DHS, and ubiquitous DHS). Motifs with more than one entry in the databases utilized were edited to retain only the first occurrence of the motif.

| All DHS x Intergenic |                         |          |          | REP-selective DHS x Intergenic |                                                       |          |          | Ubiquitous DHS x Intergenic |                         |          |          |
|----------------------|-------------------------|----------|----------|--------------------------------|-------------------------------------------------------|----------|----------|-----------------------------|-------------------------|----------|----------|
| ID                   | Name                    | p < 0.01 | p > 0.99 | ID                             | Name                                                  | p < 0.01 | p > 0.99 | ID                          | Name                    | p < 0.01 | p > 0.99 |
| MA0002.2             | RUNX1                   | 23       | 0        | MA0099.2                       | AP1                                                   | 23       | 0        | MA0003.1                    | TFAP2A                  | 23       | 0        |
| MA0003.1             | TFAP2A                  | 23       | 0        | V\$AP1FJ_Q2                    | activator protein 1                                   | 23       | 0        | MA0068.1                    | Pax4                    | 23       | 0        |
| MA0048.1             | NHLH1                   | 23       | 0        | V\$AP4_Q5                      | activator protein 4                                   | 23       | 0        | MA0080.2                    | SPI1                    | 23       | 0        |
| MA0055.1             | Myf                     | 23       | 0        | V\$BACH2_01                    | BTB and CNC homolog 2                                 | 23       | 0        | MA0084.1                    | SRY                     | 23       | 0        |
| MA0056.1             | MZF1_1-4                | 23       | 0        | V\$ETS2_Q6                     | ETS2                                                  | 23       | 0        | MA0098.1                    | ETS1                    | 23       | 0        |
| MA0068.1             | Pax4                    | 23       | 0        | V\$FRA1_Q5                     | FRA1                                                  | 23       | 0        | MA0139.1                    | CTCF                    | 23       | 0        |
| MA0080.2             | SPI1                    | 23       | 0        | V\$HEB_Q6                      | HEB                                                   | 23       | 0        | V\$ALX3_01                  | ALX-3                   | 23       | 0        |
| MA0081.1             | SPIB                    | 23       | 0        | V\$LBP1_Q6                     | LBP-1                                                 | 23       | 0        | V\$ALX4_02                  | Alx-4                   | 23       | 0        |
| MA0090.1             | TEAD1                   | 23       | 0        | V\$MAFB_01                     | MAFB                                                  | 23       | 0        | V\$AMEF2_Q6                 | myocyte enhancer factor | 23       | 0        |
| MA0098.1             | ETS1                    | 23       | 0        | V\$NEUROD_02                   | NeuroD                                                | 23       | 0        | V\$AP2_Q6_01                | AP-2                    | 23       | 0        |
| MA0099.2             | AP1                     | 23       | 0        | V\$NF1_Q6                      | nuclear factor 1                                      | 23       | 0        | V\$AP2ALPHA_01              | AP-2alpha               | 23       | 0        |
| MA0136.1             | ELF5                    | 23       | 0        | V\$NFE2_01                     | NF-E2 p45                                             | 23       | 0        | V\$AP4_Q5                   | activator protein 4     | 23       | 0        |
| MA0139.1             | CTCF                    | 23       | 0        | V\$PUR1_Q4                     | PUR1                                                  | 23       | 0        | V\$AR_Q6                    | half-site matrix        | 23       | 0        |
| MA0144.1             | Stat3                   | 23       | 0        | V\$TR4_01                      | TR4                                                   | 23       | 0        | V\$ARX_01                   | Arx                     | 23       | 0        |
| MA0150.1             | NFE2L2                  | 23       | 0        | MA0002.2                       | RUNX1                                                 | 22       | 0        | V\$BARHL1_01                | Barhl-1                 | 23       | 0        |
| MA0154.1             | EBF1                    | 23       | 0        | V\$CMF_02                      | C-MAF                                                 | 22       | 0        | V\$BARHL2_01                | Barhl2                  | 23       | 0        |
| MA0156.1             | FEV                     | 23       | 0        | V\$FPM315_01                   | Zinc finger protein FPM315 with KRAB and SCAN domains | 22       | 0        | V\$BARX1_01                 | Barx1                   | 23       | 0        |
| V\$ALX3_01           | ALX-3                   | 23       | 0        | V\$LMAF_Q2                     | LMAF                                                  | 22       | 0        | V\$BARX2_01                 | Barx-2                  | 23       | 0        |
| V\$AMEF2_Q6          | myocyte enhancer factor | 23       | 0        | V\$MATH1_Q2                    | E47:MATH1                                             | 22       | 0        | V\$BCL6_01                  | BCL6                    | 23       | 0        |
| V\$AP1FJ_Q           | activator protein 1     | 23       | 0        | V\$NRF2_Q4                     | heterodimer containing Nrf2                           | 22       | 0        | V\$BEN_01                   | BEN                     | 23       | 0        |

|                          |                       |    |   |                         |                                                    |    |   |                |                                      |    |   |  |
|--------------------------|-----------------------|----|---|-------------------------|----------------------------------------------------|----|---|----------------|--------------------------------------|----|---|--|
| 2                        |                       |    |   |                         |                                                    |    |   |                |                                      |    |   |  |
| V\$AP2_Q6_01             | AP-2                  | 23 | 0 | MA0055.1                | Myf                                                | 21 | 0 | V\$BLIMP1_Q6   | BLIMP1                               | 23 | 0 |  |
| V\$AP2ALPHA_01           | AP-2alpha             | 23 | 0 | MA0090.1                | TEAD1                                              | 21 | 0 | V\$BRN3C_01    | Brn-3c                               | 23 | 0 |  |
| V\$AP2GAMMA_01           | AP-2gamma             | 23 | 0 | V\$BACH1_01             | BTB and CNC homolog 1                              | 21 | 0 | V\$BRN4_01     | Brn-4                                | 23 | 0 |  |
| V\$AP4_01                | activator protein 4   | 23 | 0 | V\$CACBINDINGPROTEIN_Q6 | CAC-binding protein                                | 21 | 0 | V\$BSX_01      | Bsx                                  | 23 | 0 |  |
| V\$AR_Q6                 | half-site matrix      | 23 | 0 | V\$ETS1_B               | c-ETS-1 binding site                               | 21 | 0 | V\$CART1_02    | CART1                                | 23 | 0 |  |
| V\$ARX_01                | Arx                   | 23 | 0 | V\$ETS_Q4               | Ets                                                | 21 | 0 | V\$CDP_03      | CDP                                  | 23 | 0 |  |
| V\$BACH1_01              | BTB and CNC homolog 1 | 23 | 0 | V\$MAZ_Q6               | MAZ                                                | 21 | 0 | V\$CDX1_01     | Cdx-1                                | 23 | 0 |  |
| V\$BACH2_01              | BTB and CNC homolog 2 | 23 | 0 | V\$MYOGENIN_Q6          | myogenin                                           | 21 | 0 | V\$CDX2_01     | Cdx-2                                | 23 | 0 |  |
| V\$BARHL1_01             | Barhl-1               | 23 | 0 | V\$TEF_01               | TEF b.s.                                           | 21 | 0 | V\$CEBP_Q2     | CCAAT/enhancer binding factor        | 23 | 0 |  |
| V\$BARHL2_01             | Barhl2                | 23 | 0 | V\$AML_Q6               | AML                                                | 20 | 0 | V\$CEBPA_01    | CCAAT/enhancer binding protein alpha | 23 | 0 |  |
| V\$BARX1_01              | Barx1                 | 23 | 0 | V\$BEN_01               | BEN                                                | 20 | 0 | V\$CETS1P54_02 | c-Ets-1(p54)                         | 23 | 0 |  |
| V\$BARX2_01              | Barx-2                | 23 | 0 | V\$COREBINDINGFACTOR_Q6 | core-binding factor                                | 20 | 0 | V\$CPHX_01     | Cphx                                 | 23 | 0 |  |
| V\$BEN_01                | BEN                   | 23 | 0 | V\$ELF1_Q5              | ELF1                                               | 20 | 0 | V\$DBX1_01     | Dbx-1                                | 23 | 0 |  |
| V\$BLIMP1_Q6             | BLIMP1                | 23 | 0 | V\$MAF_Q6_01            | MAF                                                | 20 | 0 | V\$DBX2_01     | Dbx-2                                | 23 | 0 |  |
| V\$BRN3C_01              | Brn-3c                | 23 | 0 | V\$MAFA_Q4_01           | MAFA                                               | 20 | 0 | V\$DLX1_01     | Dlx-1                                | 23 | 0 |  |
| V\$BRN4_01               | Brn-4                 | 23 | 0 | V\$MZF1_Q5              | MZF1                                               | 20 | 0 | V\$DLX2_01     | Dlx-2                                | 23 | 0 |  |
| V\$CACCCBINDINGFACTOR_Q6 | CACCC-binding factor  | 23 | 0 | V\$STAT3_02             | signal transducer and activator of transcription 3 | 20 | 0 | V\$DLX3_01     | dlx3                                 | 23 | 0 |  |
| V\$CART1_02              | CART1                 | 23 | 0 | MA0081.1                | SPIB                                               | 19 | 0 | V\$DLX5_01     | dlx5                                 | 23 | 0 |  |
| V\$CDP_03                | CDP                   | 23 | 0 | MA0150.1                | NFE2L2                                             | 19 | 0 | V\$DLX7_01     | Dlx7                                 | 23 | 0 |  |
| V\$CDX1_01               | Cdx-1                 | 23 | 0 | MA0161.1                | NFIC                                               | 19 | 0 | V\$DOBOX4_01   | Dobox4                               | 23 | 0 |  |
| V\$CDX2_01               | Cdx-2                 | 23 | 0 | V\$CKROX_Q2             | CKROX                                              | 19 | 0 | V\$DOBOX5_01   | Dobox5                               | 23 | 0 |  |

|                          |                                      |    |   |                  |                                                                              |    |   |                  |                                                       |    |   |
|--------------------------|--------------------------------------|----|---|------------------|------------------------------------------------------------------------------|----|---|------------------|-------------------------------------------------------|----|---|
| V\$CDX_Q5                | Cdx                                  | 23 | 0 | V\$HNF4_Q6_Q3    | half-site 2                                                                  | 19 | 0 | V\$DR11_01       | DR11 b.s.                                             | 23 | 0 |
| V\$CEBP_Q2               | CCAAT/enhancer binding factor        | 23 | 0 | V\$NERF_Q2       | new ets-related factor 1a                                                    | 19 | 0 | V\$DUXL_01       | Duxl                                                  | 23 | 0 |
| V\$CEBPA_01              | CCAAT/enhancer binding protein alpha | 23 | 0 | V\$PEA3_Q6       | PEA3                                                                         | 19 | 0 | V\$E2F1_01       | E2F1                                                  | 23 | 0 |
| V\$CETS1P54_01           | c-Ets-1(p54)                         | 23 | 0 | V\$PEBP_Q6       | PEBP                                                                         | 19 | 0 | V\$E2F6_01       | E2F6                                                  | 23 | 0 |
| V\$CKROX_Q2              | CKROX                                | 23 | 0 | V\$T3R_Q6        | half-site matrix                                                             | 19 | 0 | V\$ELF1_Q5       | ELF1                                                  | 23 | 0 |
| V\$CMF2_02               | C-MAF                                | 23 | 0 | MA0056.1         | MZF1_1-4                                                                     | 18 | 0 | V\$ELK1_01       | Elk-1                                                 | 23 | 0 |
| V\$COREBIN_DINGFACTOR_Q6 | core-binding factor                  | 23 | 0 | V\$PU1_Q6        | PU.1                                                                         | 18 | 0 | V\$EMX2_01       | EMX2                                                  | 23 | 0 |
| V\$DBX1_01               | Dbx-1                                | 23 | 0 | MA0119.1         | TLX1::NFIC                                                                   | 17 | 0 | V\$EN1_02        | En-1                                                  | 23 | 0 |
| V\$DBX2_01               | Dbx-2                                | 23 | 0 | MA0154.1         | EBF1                                                                         | 17 | 0 | V\$EN2_01        | En-2                                                  | 23 | 0 |
| V\$DLX2_01               | Dlx-2                                | 23 | 0 | MA0156.1         | FEV                                                                          | 17 | 0 | V\$ESX1_01       | Esx1                                                  | 23 | 0 |
| V\$DOBOX5_01             | Dobox5                               | 23 | 0 | V\$AP2REP_01     | AP-2 repressor                                                               | 17 | 0 | V\$ETF_Q6        | ETF                                                   | 23 | 0 |
| V\$DR1_Q3                | Direct repeat 1                      | 23 | 0 | V\$CTF1_01       | selection of the binding sites for CTCF by HOX11 cooperative DNA binding [2] | 17 | 0 | V\$ETS2_B        | c-Ets-2 binding sites                                 | 23 | 0 |
| V\$E12_Q6                | E12                                  | 23 | 0 | V\$E2A_Q6        | E2A                                                                          | 17 | 0 | V\$ETS_Q4        | Ets                                                   | 23 | 0 |
| V\$E2F1_01               | E2F1                                 | 23 | 0 | V\$FLI1_Q6       | FLI1                                                                         | 17 | 0 | V\$EV11_04       | ectopic viral integration site 1 encoded factor       | 23 | 0 |
| V\$E2F6_01               | E2F6                                 | 23 | 0 | V\$GABPALP_HA_Q4 | GABP-alpha                                                                   | 17 | 0 | V\$EVX1_01       | Evx-1                                                 | 23 | 0 |
| V\$E47_01                | E47                                  | 23 | 0 | V\$LMO2COM_01    | complex of Lmo2 bound to Tal-1, E2A proteins, and GATA-1, half-site 1        | 17 | 0 | V\$FAC1_01       | fetal Alz-50 clone 1                                  | 23 | 0 |
| V\$EAR2_Q2               | EAR2                                 | 23 | 0 | V\$SMAD4_Q6      | SMAD4                                                                        | 17 | 0 | V\$FOXO1_01      | fork head box O1                                      | 23 | 0 |
| V\$EBF_Q6                | EBF                                  | 23 | 0 | V\$SP1_Q2_01     | Sp1                                                                          | 17 | 0 | V\$FOXO4_01      | fork head box O4                                      | 23 | 0 |
| V\$EGR_Q6                | Egr                                  | 23 | 0 | V\$STAT6_Q2      | signal transducer and activator of transcription 6                           | 17 | 0 | V\$FPM315_01     | Zinc finger protein FPM315 with KRAB and SCAN domains | 23 | 0 |
| V\$ELF1_Q5               | ELF1                                 | 23 | 0 | V\$TAL1_Q6       | TAL1                                                                         | 17 | 0 | V\$FREAC7_01     | Fork head RELATED ACTivator-7                         | 23 | 0 |
| V\$ELK1_01               | Elk-1                                | 23 | 0 | MA0080.2         | SPI1                                                                         | 16 | 0 | V\$GABPALP_HA_Q4 | GABP-alpha                                            | 23 | 0 |
| V\$EN2_01                | En-2                                 | 23 | 0 | V\$E12_Q6        | E12                                                                          | 16 | 0 | V\$GBX1_01       | Gbx1                                                  | 23 | 0 |
| V\$ER_Q6_02              | half-site matrix, half-ERE           | 23 | 0 | V\$EBF_Q6        | EBF                                                                          | 16 | 0 | V\$GBX2_01       | Gbx2                                                  | 23 | 0 |

|                  |                                                       |    |   |                 |                             |    |   |               |                                 |    |   |
|------------------|-------------------------------------------------------|----|---|-----------------|-----------------------------|----|---|---------------|---------------------------------|----|---|
| V\$ESE1_Q3       | ESE1                                                  | 23 | 0 | V\$SREBP2_Q6    | SREBP2                      | 16 | 0 | V\$GSC_01     | Gsc                             | 23 | 0 |
| V\$ESX1_01       | Esx1                                                  | 23 | 0 | V\$TFII_Q6      | TFII-I                      | 16 | 0 | V\$GSH2_01    | GSH2                            | 23 | 0 |
| V\$ETS2_B        | c-Ets-2 binding sites                                 | 23 | 0 | MA0067.1        | Pax2                        | 15 | 0 | V\$HB24_01    | HB24                            | 23 | 0 |
| V\$ETS_Q4        | Ets                                                   | 23 | 0 | MA0117.1        | Mafb                        | 15 | 0 | V\$HB9_01     | HB9                             | 23 | 0 |
| V\$FLI1_Q6       | FLI1                                                  | 23 | 0 | MA0136.1        | ELF5                        | 15 | 0 | V\$HDX_01     | Hdx                             | 23 | 0 |
| V\$FPM315_01     | Zinc finger protein FPM315 with KRAB and SCAN domains | 23 | 0 | V\$AML1_Q4      | AML1                        | 15 | 0 | V\$HEB_Q6     | HEB                             | 23 | 0 |
| V\$FRA1_Q5       | FRA1                                                  | 23 | 0 | V\$CTCF_01      | CTCF                        | 15 | 0 | V\$HMBOX1_01  | Hmbox1                          | 23 | 0 |
| V\$GABPALP_HA_Q4 | GABP-alpha                                            | 23 | 0 | V\$PAX4_03      | Pax-4 binding sites         | 15 | 0 | V\$HMG1Y_01   | HMG1Y                           | 23 | 0 |
| V\$GAF_Q6        | GAF                                                   | 23 | 0 | V\$PPARG_Q6     | half-site                   | 15 | 0 | V\$HMX1_02    | HMX1                            | 23 | 0 |
| V\$HB24_01       | HB24                                                  | 23 | 0 | V\$SMAD3_Q6     | SMAD3                       | 15 | 0 | V\$HMX3_02    | Nkx5-1                          | 23 | 0 |
| V\$HEB_Q6        | HEB                                                   | 23 | 0 | V\$TEF1_Q6      | TEF-1                       | 15 | 0 | V\$HNF1_02    | HNF-1alpha                      | 23 | 0 |
| V\$HMX1_02       | HMX1                                                  | 23 | 0 | MA0144.1        | Stat3                       | 14 | 0 | V\$HNF1B_01   | HNF-1beta                       | 23 | 0 |
| V\$HMX3_02       | Nkx5-1                                                | 23 | 0 | V\$CETS1P5_4_01 | c-Ets-1(p54)                | 14 | 0 | V\$HNF3_Q6_01 | HNF3                            | 23 | 0 |
| V\$HNF1_Q6       | HNF1                                                  | 23 | 0 | V\$ESE1_Q3      | ESE1                        | 14 | 0 | V\$HNF3B_01   | Hepatocyte Nuclear Factor 3beta | 23 | 0 |
| V\$HOMEZ_01      | Homez                                                 | 23 | 0 | V\$KID3_01      | Kid3                        | 14 | 0 | V\$HOMEZ_01   | Homez                           | 23 | 0 |
| V\$HOXA13_02     | HOXA5                                                 | 23 | 0 | V\$LFA1_Q6      | LF-A1                       | 14 | 0 | V\$HOXA13_02  | HOXA5                           | 23 | 0 |
| V\$HOXA10_01     | HOXA10                                                | 23 | 0 | V\$MTF1_02      | MTF1                        | 14 | 0 | V\$HOXA10_01  | HOXA10                          | 23 | 0 |
| V\$HOXA2_01      | HoxA2                                                 | 23 | 0 | V\$MYOD_Q6      | myoblast determining factor | 14 | 0 | V\$HOXA11_01  | HOXA11                          | 23 | 0 |
| V\$HOXA4_01      | HOXA4                                                 | 23 | 0 | V\$TEL2_Q6      | Tel-2                       | 14 | 0 | V\$HOXA13_02  | HOXA13                          | 23 | 0 |
| V\$HOXA6_01      | HOXA6                                                 | 23 | 0 | V\$WT1_Q6       | WT1                         | 14 | 0 | V\$HOXA1_01   | HOXA1                           | 23 | 0 |
| V\$HOXA7_02      | HOXA7                                                 | 23 | 0 | MA0089.1        | NFE2L1::MafG                | 13 | 0 | V\$HOXA2_01   | HoxA2                           | 23 | 0 |
| V\$HOXA9_01      | hoxa9                                                 | 23 | 0 | V\$AP2_Q6_01    | AP-2                        | 13 | 0 | V\$HOXA3_02   | HOXA3                           | 23 | 0 |
| V\$HOXB13_01     | HOXB13                                                | 23 | 0 | V\$CEBPE_01     | cebpe                       | 13 | 0 | V\$HOXA4_01   | HOXA4                           | 23 | 0 |
| V\$HOXB3_01      | HOXB3                                                 | 23 | 0 | V\$E47_01       | E47                         | 13 | 0 | V\$HOXA6_01   | HOXA6                           | 23 | 0 |

|                  |        |    |   |                                  |                                                             |    |   |                  |        |    |   |
|------------------|--------|----|---|----------------------------------|-------------------------------------------------------------|----|---|------------------|--------|----|---|
| V\$HOXB4_0<br>1  | HOXB4  | 23 | 0 | V\$ER_Q6_0<br>2                  | half-site matrix, half-ERE                                  | 13 | 0 | V\$HOXA7_0<br>2  | HOXA7  | 23 | 0 |
| V\$HOXB5_0<br>1  | HoxB5  | 23 | 0 | V\$GAF_Q6                        | GAF                                                         | 13 | 0 | V\$HOXA9_0<br>1  | hoxa9  | 23 | 0 |
| V\$HOXB6_0<br>1  | HOXB6  | 23 | 0 | V\$NFKB_Q6<br>_01                | NF-kappaB                                                   | 13 | 0 | V\$HOXB13_<br>01 | HOXB13 | 23 | 0 |
| V\$HOXB7_0<br>1  | HOXB7  | 23 | 0 | V\$OSF2_Q6                       | Osf2                                                        | 13 | 0 | V\$HOXB3_0<br>1  | HOXB3  | 23 | 0 |
| V\$HOXB8_0<br>1  | HOXB8  | 23 | 0 | V\$SP3_Q3                        | Sp3                                                         | 13 | 0 | V\$HOXB4_0<br>1  | HOXB4  | 23 | 0 |
| V\$HOXB9_0<br>1  | HOXB9  | 23 | 0 | V\$AR_Q6                         | half-site matrix                                            | 12 | 0 | V\$HOXB5_0<br>1  | HoxB5  | 23 | 0 |
| V\$HOXC13_<br>01 | HOXC13 | 23 | 0 | V\$ELK1_01                       | Elk-1                                                       | 12 | 0 | V\$HOXB6_0<br>1  | HOXB6  | 23 | 0 |
| V\$HOXC4_0<br>1  | HOXC4  | 23 | 0 | MA0003.1                         | TFAP2A                                                      | 11 | 0 | V\$HOXB7_0<br>1  | HOXB7  | 23 | 0 |
| V\$HOXC5_0<br>1  | HOXC5  | 23 | 0 | MA0092.1                         | Hand1::Tcfe2a                                               | 11 | 0 | V\$HOXB8_0<br>1  | HOXB8  | 23 | 0 |
| V\$HOXC6_0<br>1  | HOXC6  | 23 | 0 | V\$AP2ALPH<br>A_01               | AP-2alpha                                                   | 11 | 0 | V\$HOXB9_0<br>1  | HOXB9  | 23 | 0 |
| V\$HOXC8_0<br>1  | HOXC-8 | 23 | 0 | V\$BLIMP1_Q<br>6                 | BLIMP1                                                      | 11 | 0 | V\$HOXC10_<br>01 | HOXC10 | 23 | 0 |
| V\$HOXC9_0<br>1  | HOXC9  | 23 | 0 | V\$CACCCBI<br>NDINGFACT<br>OR_Q6 | CACCC-binding factor                                        | 11 | 0 | V\$HOXC11_<br>01 | HOXC11 | 23 | 0 |
| V\$HOXD10_<br>01 | HOXD10 | 23 | 0 | V\$CREB_Q3                       | CREB                                                        | 11 | 0 | V\$HOXC12_<br>01 | HOXC12 | 23 | 0 |
| V\$HOXD13_<br>01 | HOXD13 | 23 | 0 | V\$EBOX_Q6<br>_01                | Ebox                                                        | 11 | 0 | V\$HOXC13_<br>01 | HOXC13 | 23 | 0 |
| V\$HOXD1_0<br>1  | HOXD1  | 23 | 0 | V\$P50RELA<br>P65_Q5_01          | P50:RELA-P65                                                | 11 | 0 | V\$HOXC4_0<br>1  | HOXC4  | 23 | 0 |
| V\$HOXD3_0<br>1  | HOXD3  | 23 | 0 | V\$RBPJK_Q<br>4                  | RBP-Jkappa                                                  | 11 | 0 | V\$HOXC5_0<br>1  | HOXC5  | 23 | 0 |
| V\$HOXD8_0<br>1  | HOXD8  | 23 | 0 | V\$SMAD_Q6                       | SMAD                                                        | 11 | 0 | V\$HOXC6_0<br>1  | HOXC6  | 23 | 0 |
| V\$ICSBP_Q<br>6  | ICSBP  | 23 | 0 | V\$SREBP1_<br>Q5                 | SREBP1                                                      | 11 | 0 | V\$HOXC8_0<br>1  | HOXC-8 | 23 | 0 |
| V\$IPF1_06       | ipf1   | 23 | 0 | V\$STAT1_05                      | STAT1                                                       | 11 | 0 | V\$HOXC9_0<br>1  | HOXC9  | 23 | 0 |
| V\$IRF3_Q3       | IRF3   | 23 | 0 | V\$USF2_Q6                       | USF2                                                        | 11 | 0 | V\$HOXD10_<br>01 | HOXD10 | 23 | 0 |
| V\$IRF_Q6        | IRF    | 23 | 0 | V\$USF_Q6_<br>01                 | USF                                                         | 11 | 0 | V\$HOXD11_<br>01 | HOXD11 | 23 | 0 |
| V\$ISL2_01       | Isl2   | 23 | 0 | V\$VDR_Q3                        | vitamin D receptor; mediates<br>vitamin D3-signaling, often | 11 | 0 | V\$HOXD12_<br>01 | HOXD12 | 23 | 0 |



|                |                                        |    |   |                |                                         |    |   |              |                                        |    |   |
|----------------|----------------------------------------|----|---|----------------|-----------------------------------------|----|---|--------------|----------------------------------------|----|---|
|                |                                        |    |   |                | dimerizes with RXR-alpha                |    |   |              |                                        |    |   |
| V\$ISRE_01     | interferon-stimulated response element | 23 | 0 | V\$ZBED6_01    | ZBED6                                   | 11 | 0 | V\$HOXD13_01 | HOXD13                                 | 23 | 0 |
| V\$K2B_01      | K-2b                                   | 23 | 0 | V\$AP2GAMMA_01 | AP-2gamma                               | 10 | 0 | V\$HOXD1_01  | HOXD1                                  | 23 | 0 |
| V\$LBP1_Q6     | LBP-1                                  | 23 | 0 | V\$ATF4_Q2     | activating transcription factor 4       | 10 | 0 | V\$HOXD3_01  | HOXD3                                  | 23 | 0 |
| V\$Lbx2_01     | Lbx2                                   | 23 | 0 | V\$CP2_01      | CP2                                     | 10 | 0 | V\$HOXD8_01  | HOXD8                                  | 23 | 0 |
| V\$LFA1_Q6     | LF-A1                                  | 23 | 0 | V\$OLF1_01     | olfactory neuron-specific factor        | 10 | 0 | V\$ICSBP_Q6  | ICSBP                                  | 23 | 0 |
| V\$LH2_01      | LH-2                                   | 23 | 0 | V\$PAX8_01     | Pax-8 binding sites                     | 10 | 0 | V\$IPF1_05   | homeobox transcription factor Pdx-1    | 23 | 0 |
| V\$LHX3_02     | Lhx3                                   | 23 | 0 | V\$ZIC3_01     | zinc finger protein of the cerebellum 3 | 10 | 0 | V\$IRF3_Q3   | IRF3                                   | 23 | 0 |
| V\$LHX5_01     | Lhx5                                   | 23 | 0 | MA0048.1       | NHLH1                                   | 9  | 0 | V\$IRF_Q6    | IRF                                    | 23 | 0 |
| V\$LHX61_01    | lhx6.1                                 | 23 | 0 | MA0112.2       | ESR1                                    | 9  | 0 | V\$IRX2_01   | Irx2                                   | 23 | 0 |
| V\$LHX9_01     | Lhx9                                   | 23 | 0 | V\$AML2_01     | AML2                                    | 9  | 0 | V\$IRX3_01   | Irx-3                                  | 23 | 0 |
| V\$Lim1_01     | Lim-1                                  | 23 | 0 | V\$ATF3_Q6     | activating transcription factor 3       | 9  | 0 | V\$IRX4_01   | IRX4                                   | 23 | 0 |
| V\$LMAF_Q2     | LMAF                                   | 23 | 0 | V\$CEBPB_02    | CCAAT/enhancer binding protein beta     | 9  | 0 | V\$IRX5_01   | Irx5                                   | 23 | 0 |
| V\$LMX1_01     | Lmx-1                                  | 23 | 0 | V\$GADP_01     | Growth-associated binding protein       | 9  | 0 | V\$IRXB3_01  | IRXB3                                  | 23 | 0 |
| V\$LMX1B_01    | lmx1b                                  | 23 | 0 | V\$GLI3_02     | GLI3                                    | 9  | 0 | V\$ISL2_01   | Isl2                                   | 23 | 0 |
| V\$LTF_Q6      | LTF                                    | 23 | 0 | V\$KAISO_01    | KAISO                                   | 9  | 0 | V\$ISRE_01   | interferon-stimulated response element | 23 | 0 |
| V\$MATH1_Q2    | E47:MATH1                              | 23 | 0 | V\$MEIS2_02    | MEIS2                                   | 9  | 0 | V\$ISX_01    | isx                                    | 23 | 0 |
| V\$MAZ_Q6      | MAZ                                    | 23 | 0 | V\$SP4_Q5      | SP4                                     | 9  | 0 | V\$K2B_01    | K-2b                                   | 23 | 0 |
| V\$MMEF2_Q6    | myocyte enhancer factor 6              | 23 | 0 | MA0093.1       | USF1                                    | 8  | 0 | V\$LBP1_Q6   | LBP-1                                  | 23 | 0 |
| V\$MOX1_01     | Mox1                                   | 23 | 0 | MA0101.1       | REL                                     | 8  | 0 | V\$Lbx2_01   | Lbx2                                   | 23 | 0 |
| V\$MSX1_02     | Msx-1                                  | 23 | 0 | V\$CACD_01     | CACD                                    | 8  | 0 | V\$LH2_01    | LH-2                                   | 23 | 0 |
| V\$MSX3_01     | Msx-3                                  | 23 | 0 | V\$DR1_Q3      | Direct repeat 1                         | 8  | 0 | V\$LHX3_02   | Lhx3                                   | 23 | 0 |
| V\$MYOD_01     | myoblast determination gene product    | 23 | 0 | V\$GABP_B      | GA binding protein                      | 8  | 0 | V\$LHX4_01   | Lhx4                                   | 23 | 0 |
| V\$MYOGENIN_Q6 | myogenin                               | 23 | 0 | V\$GLI1_01     | GLI1                                    | 8  | 0 | V\$LHX5_01   | Lhx5                                   | 23 | 0 |
| V\$MZF1_01     | MZF1                                   | 23 | 0 | V\$HNF1_Q6     | HNF1                                    | 8  | 0 | V\$LHX61_01  | lhx6.1                                 | 23 | 0 |

|                      |                              |    |   |                 |                                                    |   |   |               |                                     |    |   |
|----------------------|------------------------------|----|---|-----------------|----------------------------------------------------|---|---|---------------|-------------------------------------|----|---|
| V\$NCX_02            | Ncx                          | 23 | 0 | V\$HSF1_01      | heat shock factor 1                                | 8 | 0 | V\$LHX9_01    | Lhx9                                | 23 | 0 |
| V\$NERF_Q2           | new ets-related factor 1a    | 23 | 0 | V\$LTF_Q6       | LTF                                                | 8 | 0 | V\$LIM1_01    | Lim-1                               | 23 | 0 |
| V\$NEUROD_01         | Neuro D                      | 23 | 0 | V\$STAT_01      | signal transducers and activators of transcription | 8 | 0 | V\$LMX1_01    | Lmx-1                               | 23 | 0 |
| V\$NF1_Q6            | nuclear factor 1             | 23 | 0 | V\$ZFP281_01    | Zfp281                                             | 8 | 0 | V\$LMX1B_01   | lmx1b                               | 23 | 0 |
| V\$NFE2_01           | NF-E2 p45                    | 23 | 0 | MA0004.1        | Arnt                                               | 7 | 0 | V\$MATH1_Q2   | E47:MATH1                           | 23 | 0 |
| V\$NFKB_Q6_01        | NF-kappaB                    | 23 | 0 | MA0014.1        | Pax5                                               | 7 | 0 | V\$MEF2_Q6_01 | MEF-2                               | 23 | 0 |
| V\$NKX12_01          | Nkx1-2                       | 23 | 0 | MA0102.2        | CEBPA                                              | 7 | 0 | V\$MEIS1_02   | Meis1                               | 23 | 0 |
| V\$NKX52_01          | Nkx5-2                       | 23 | 0 | MA0107.1        | RELA                                               | 7 | 0 | V\$MEIS2_01   | Meis2                               | 23 | 0 |
| V\$NKX61_02          | NKX6.1                       | 23 | 0 | MA0145.1        | Tcfcp2l1                                           | 7 | 0 | V\$MMEF2_Q6   | myocyte enhancer factor 6           | 23 | 0 |
| V\$NKX63_01          | Nkx6-3                       | 23 | 0 | V\$CEBPDELTA_Q6 | C/EBPdelta                                         | 7 | 0 | V\$MOX1_01    | Mox1                                | 23 | 0 |
| V\$NRF2_01           | nuclear respiratory factor 2 | 23 | 0 | V\$CREL_01      | c-Rel                                              | 7 | 0 | V\$MRG2_01    | MRG2                                | 23 | 0 |
| V\$OBOX5_01          | Obox5                        | 23 | 0 | V\$GLI2_01      | GLI2                                               | 7 | 0 | V\$MSX1_02    | Msx-1                               | 23 | 0 |
| V\$OCT1_08           | 1-Oct                        | 23 | 0 | V\$HOXB4_01     | HOXB4                                              | 7 | 0 | V\$MSX2_01    | Msx-2                               | 23 | 0 |
| V\$OCTAMER_01        | Octamer                      | 23 | 0 | V\$HOXC4_01     | HOXC4                                              | 7 | 0 | V\$MSX3_01    | Msx-3                               | 23 | 0 |
| V\$OTP_01            | OTP                          | 23 | 0 | V\$HOXC5_01     | HOXC5                                              | 7 | 0 | V\$NANOG_02   | Nanog                               | 23 | 0 |
| V\$OTX1_01           | Otx1                         | 23 | 0 | V\$LHX9_01      | Lhx9                                               | 7 | 0 | V\$NCX_02     | Ncx                                 | 23 | 0 |
| V\$OTX2_01           | Otx2                         | 23 | 0 | V\$NKX11_01     | Nkx1-1                                             | 7 | 0 | V\$NEUROD_02  | NeuroD                              | 23 | 0 |
| V\$P50RELA_P65_Q5_01 | P50:RELA-P65                 | 23 | 0 | V\$P50P50_Q3    | P50:P50                                            | 7 | 0 | V\$NFAT1_Q6   | NFAT1                               | 23 | 0 |
| V\$PAX6_02           | pax6                         | 23 | 0 | V\$PMX2B_01     | PMX2B                                              | 7 | 0 | V\$NFAT3_Q3   | NFAT3                               | 23 | 0 |
| V\$PAX7_01           | Pax-7                        | 23 | 0 | V\$UNCX4.1_01   | Uncx-4.1                                           | 7 | 0 | V\$NFAT_Q6    | Nuclear factor of activated T-cells | 23 | 0 |
| V\$PEA3_Q6           | PEA3                         | 23 | 0 | V\$VSX1_01      | Vsx1                                               | 7 | 0 | V\$NKX11_01   | Nkx1-1                              | 23 | 0 |
| V\$PIT1_01           | Pit-1                        | 23 | 0 | MA0039.2        | Klf4                                               | 6 | 0 | V\$NKX12_01   | Nkx1-2                              | 23 | 0 |
| V\$PITX2_01          | PITX2                        | 23 | 0 | MA0065.2        | PPARG::RXRA                                        | 6 | 0 | V\$NKX22_02   | NKX22                               | 23 | 0 |
| V\$PMX2B_01          | PMX2B                        | 23 | 0 | MA0068.1        | Pax4                                               | 6 | 0 | V\$NKX23_01   | Nkx2-3                              | 23 | 0 |
| V\$POU6F1_1          | POU6F1                       | 23 | 0 | MA0130.1        | ZNF354C                                            | 6 | 0 | V\$NKX24_01   | Nkx2-4                              | 23 | 0 |

|                  |                                                    |    |   |                  |                         |   |   |                |                                |    |   |
|------------------|----------------------------------------------------|----|---|------------------|-------------------------|---|---|----------------|--------------------------------|----|---|
| 02               |                                                    |    |   |                  |                         |   |   |                |                                |    |   |
| V\$PPARG_Q6      | half-site                                          | 23 | 0 | MA0159.1         | RXR::RAR_DR5            | 6 | 0 | V\$NKX25_03    | NKX25                          | 23 | 0 |
| V\$PROP1_02      | Prop-1                                             | 23 | 0 | V\$BRN4_01       | Brn-4                   | 6 | 0 | V\$NKX26_01    | Nkx2-6                         | 23 | 0 |
| V\$PSX1_01       | PSX1                                               | 23 | 0 | V\$CART1_02      | CART1                   | 6 | 0 | V\$NKX29_01    | Nkx2-9                         | 23 | 0 |
| V\$PU1_Q4        | PU.1                                               | 23 | 0 | V\$CEBP_Q2_01    | C/EBP                   | 6 | 0 | V\$NKX32_02    | Nkx3-2                         | 23 | 0 |
| V\$SHOX2_01      | Shox2                                              | 23 | 0 | V\$CLOCKB_MAL_Q6 | CLOCK:BMAL              | 6 | 0 | V\$NKX3A_02    | Nkx3A                          | 23 | 0 |
| V\$SMAD3_Q6      | SMAD3                                              | 23 | 0 | V\$COMP1_01      | COMP1                   | 6 | 0 | V\$NKX52_01    | Nkx5-2                         | 23 | 0 |
| V\$SMAD4_Q6      | SMAD4                                              | 23 | 0 | V\$CRX_02        | Crx                     | 6 | 0 | V\$NKX61_02    | NKX6.1                         | 23 | 0 |
| V\$SP1_01        | stimulating protein 1                              | 23 | 0 | V\$DLX5_01       | dlx5                    | 6 | 0 | V\$NKX62_Q2    | NK related homeobox factor 6-2 | 23 | 0 |
| V\$SP4_Q5        | SP4                                                | 23 | 0 | V\$DUXL_01       | Duxl                    | 6 | 0 | V\$NKX63_01    | Nkx6-3                         | 23 | 0 |
| V\$STAT1_03      | signal transducer and activator of transcription 1 | 23 | 0 | V\$E2F1_01       | E2F1                    | 6 | 0 | V\$OBOX1_01    | Obox1                          | 23 | 0 |
| V\$STAT1STAT1_Q3 | STAT1:STAT1                                        | 23 | 0 | V\$EMX2_01       | EMX2                    | 6 | 0 | V\$OBOX2_01    | Obox2                          | 23 | 0 |
| V\$STAT4_01      | signal transducer and activator of transcription 4 | 23 | 0 | V\$GBX2_01       | Gbx2                    | 6 | 0 | V\$OBOX3_01    | Obox3                          | 23 | 0 |
| V\$T3R_Q6        | half-site matrix                                   | 23 | 0 | V\$GR_Q6         | glucocorticoid receptor | 6 | 0 | V\$OBOX5_01    | Obox5                          | 23 | 0 |
| V\$TAL1_01       | Tal-1 (Scl)                                        | 23 | 0 | V\$HEN1_02       | HEN1                    | 6 | 0 | V\$OBOX6_01    | Obox6                          | 23 | 0 |
| V\$TEF_01        | TEF b.s.                                           | 23 | 0 | V\$HMX1_02       | HMX1                    | 6 | 0 | V\$OCT1_04     | octamer factor 1               | 23 | 0 |
| V\$TEL2_Q6       | Tel-2                                              | 23 | 0 | V\$HMX3_02       | Nkx5-1                  | 6 | 0 | V\$OCT2_01     | 2-Oct                          | 23 | 0 |
| V\$TR4_01        | TR4                                                | 23 | 0 | V\$HOXA4_01      | HOXA4                   | 6 | 0 | V\$OCTAME_R_01 | Octamer                        | 23 | 0 |
| V\$TST1_02       | 6-Oct                                              | 23 | 0 | V\$HOXC6_01      | HOXC6                   | 6 | 0 | V\$OG2_02      | OG-2                           | 23 | 0 |
| V\$UNCX4.1_01    | Uncx-4.1                                           | 23 | 0 | V\$HOXD8_01      | HOXD8                   | 6 | 0 | V\$OTP_01      | OTP                            | 23 | 0 |
| V\$USF_Q6_01     | USF                                                | 23 | 0 | V\$HSF2_01       | heat shock factor 2     | 6 | 0 | V\$OTX1_01     | Otx1                           | 23 | 0 |
| V\$VAX1_01       | Vax-1                                              | 23 | 0 | V\$KLF15_Q2      | KLF15                   | 6 | 0 | V\$OTX2_01     | Otx2                           | 23 | 0 |
| V\$VSX1_01       | Vsx1                                               | 23 | 0 | V\$KROX_Q6       | KROX                    | 6 | 0 | V\$OTX3_01     | Otx3                           | 23 | 0 |
| V\$WT1_Q6        | WT1                                                | 23 | 0 | V\$LHX3_02       | Lhx3                    | 6 | 0 | V\$PAX6_02     | pax6                           | 23 | 0 |

|              |                                                    |    |   |                   |                                                |   |   |              |                                                    |    |   |
|--------------|----------------------------------------------------|----|---|-------------------|------------------------------------------------|---|---|--------------|----------------------------------------------------|----|---|
| V\$ZBED6_01  | ZBED6                                              | 23 | 0 | V\$LHX5_01        | Lhx5                                           | 6 | 0 | V\$PAX7_01   | Pax-7                                              | 23 | 0 |
| V\$ZFP281_01 | Zfp281                                             | 23 | 0 | V\$LHX61_02       | lhx6.1                                         | 6 | 0 | V\$PBX1_04   | Pbx1                                               | 23 | 0 |
| MA0039.2     | Klf4                                               | 22 | 0 | V\$LHX8_01        | Lhx8                                           | 6 | 0 | V\$PIT1_01   | Pit-1                                              | 23 | 0 |
| MA0050.1     | IRF1                                               | 22 | 0 | V\$LRF_Q2         | LRF                                            | 6 | 0 | V\$PITX1_01  | Pitx1                                              | 23 | 0 |
| MA0065.2     | PPARG::RXRA                                        | 22 | 0 | V\$MOVOB_01       | MOVO-B                                         | 6 | 0 | V\$PITX2_01  | PITX2                                              | 23 | 0 |
| MA0101.1     | REL                                                | 22 | 0 | V\$MYOGNF_1_01    | myogenin / nuclear factor 1 or related factors | 6 | 0 | V\$PKNOX2_01 | PKNOX2                                             | 23 | 0 |
| MA0138.2     | REST                                               | 22 | 0 | V\$NFKAPPA_B65_01 | NF-kappaB (p65)                                | 6 | 0 | V\$PMX2A_01  | PMX2A                                              | 23 | 0 |
| MA0161.1     | NFIC                                               | 22 | 0 | V\$OCTAME_R_02    | Octamer                                        | 6 | 0 | V\$PMX2B_01  | PMX2B                                              | 23 | 0 |
| V\$ALX4_02   | Aix-4                                              | 22 | 0 | V\$P53_03         | tumor suppressor p53                           | 6 | 0 | V\$POU2F3_01 | POU2F3                                             | 23 | 0 |
| V\$AML_Q6    | AML                                                | 22 | 0 | V\$PIT1_01        | Pit-1                                          | 6 | 0 | V\$POU6F1_02 | POU6F1                                             | 23 | 0 |
| V\$AREB6_04  | AREB6 (Atp1a1 regulatory element binding factor 6) | 22 | 0 | V\$PKNOX2_01      | PKNOX2                                         | 6 | 0 | V\$PREP1_01  | PREP1                                              | 23 | 0 |
| V\$BSX_01    | Bsx                                                | 22 | 0 | V\$PROP1_02       | Prop-1                                         | 6 | 0 | V\$PROP1_02  | Prop-1                                             | 23 | 0 |
| V\$CEBPB_01  | CCAAT/enhancer binding protein beta                | 22 | 0 | V\$RAX_01         | rax                                            | 6 | 0 | V\$PSX1_01   | PSX1                                               | 23 | 0 |
| V\$CP2_01    | CP2                                                | 22 | 0 | V\$RHOX11_01      | Rhox11                                         | 6 | 0 | V\$PU1_Q4    | PU.1                                               | 23 | 0 |
| V\$CREL_01   | c-Rel                                              | 22 | 0 | V\$S8_02          | S8                                             | 6 | 0 | V\$RAX_01    | rax                                                | 23 | 0 |
| V\$DLX3_01   | dlx3                                               | 22 | 0 | V\$SOX9_Q4        | SOX9                                           | 6 | 0 | V\$RHOX11_01 | Rhox11                                             | 23 | 0 |
| V\$DLX7_01   | Dlx7                                               | 22 | 0 | V\$TCF11_01       | TCF11/KCR-F1/Nrf1 homodimers                   | 6 | 0 | V\$S8_02     | S8                                                 | 23 | 0 |
| V\$DUXL_01   | Duxl                                               | 22 | 0 | V\$TGIF_02        | TGIF1                                          | 6 | 0 | V\$SATB1_Q3  | SATB1                                              | 23 | 0 |
| V\$E2A_Q6    | E2A                                                | 22 | 0 | V\$TST1_02        | 6-Oct                                          | 6 | 0 | V\$SHOX2_01  | Shox2                                              | 23 | 0 |
| V\$EN1_02    | En-1                                               | 22 | 0 | MA0006.1          | Arnt::Ahr                                      | 5 | 0 | V\$SIX4_01   | six4                                               | 23 | 0 |
| V\$EV11_04   | ectopic viral integration site 1 encoded factor    | 22 | 0 | MA0046.1          | HNF1A                                          | 5 | 0 | V\$SIX6_01   | Six-6                                              | 23 | 0 |
| V\$EVX1_01   | Evx-1                                              | 22 | 0 | MA0061.1          | NF-kappaB                                      | 5 | 0 | V\$SOX2_Q6   | SOX2                                               | 23 | 0 |
| V\$GADP_01   | Growth-associated binding protein                  | 22 | 0 | MA0113.1          | NR3C1                                          | 5 | 0 | V\$SOX4_01   | SOX4                                               | 23 | 0 |
| V\$GBX1_01   | Gbx1                                               | 22 | 0 | MA0155.1          | INSM1                                          | 5 | 0 | V\$STAT1_03  | signal transducer and activator of transcription 1 | 23 | 0 |

|                   |                                                                              |    |   |                      |                                            |   |   |                      |                                                        |    |   |
|-------------------|------------------------------------------------------------------------------|----|---|----------------------|--------------------------------------------|---|---|----------------------|--------------------------------------------------------|----|---|
| V\$GSH2_01        | GSH2                                                                         | 22 | 0 | F\$AMT1_Q2           | AMT1                                       | 5 | 0 | V\$STAT1ST<br>AT1_Q3 | STAT1:STAT1                                            | 23 | 0 |
| V\$HDX_01         | Hdx                                                                          | 22 | 0 | V\$ALX4_02           | Alx-4                                      | 5 | 0 | V\$STAT3_02          | signal transducer and activator<br>of transcription 3  | 23 | 0 |
| V\$HMBOX1_01      | Hmbox1                                                                       | 22 | 0 | V\$ARX_01            | Arx                                        | 5 | 0 | V\$STAT4_01          | signal transducer and activator<br>of transcription 4  | 23 | 0 |
| V\$HNF3_Q6_01     | HNF3                                                                         | 22 | 0 | V\$BARX1_01          | Barx1                                      | 5 | 0 | V\$STAT5A_03         | signal transducer and activator<br>of transcription 5a | 23 | 0 |
| V\$HNF3B_01       | Hepatocyte Nuclear Factor<br>3beta                                           | 22 | 0 | V\$BARX2_01          | Barx-2                                     | 5 | 0 | V\$STAT6_01          | signal transducer and activator<br>of transcription 6  | 23 | 0 |
| V\$HOXA11_01      | HOXA11                                                                       | 22 | 0 | V\$BRN3C_01          | Brn-3c                                     | 5 | 0 | V\$TBP_01            | TATA binding protein                                   | 23 | 0 |
| V\$HOXA13_03      | HOXA13                                                                       | 22 | 0 | V\$CDP_03            | CDP                                        | 5 | 0 | V\$TEF_Q6            | TEF                                                    | 23 | 0 |
| V\$HOXA1_01       | HOXA1                                                                        | 22 | 0 | V\$CHCH_01           | Churchill                                  | 5 | 0 | V\$TGIF2_01          | TGIF2                                                  | 23 | 0 |
| V\$IRX4_01        | IRX4                                                                         | 22 | 0 | V\$COUPTF_Q6         | COUPTF                                     | 5 | 0 | V\$TGIF_02           | TGIF1                                                  | 23 | 0 |
| V\$KAISO_01       | KAISO                                                                        | 22 | 0 | V\$CREBP1C<br>JUN_01 | CRE-binding protein 1:c-Jun<br>heterodimer | 5 | 0 | V\$TR4_01            | TR4                                                    | 23 | 0 |
| V\$LHX4_01        | Lhx4                                                                         | 22 | 0 | V\$DEC_Q1            | DEC                                        | 5 | 0 | V\$TST1_01           | POU-factor Tst-1/Oct-6                                 | 23 | 0 |
| V\$LMO2CO<br>M_01 | complex of Lmo2 bound to Tal-<br>1, E2A proteins, and GATA-1,<br>half-site 1 | 22 | 0 | V\$EAR2_Q2           | EAR2                                       | 5 | 0 | V\$UNCX4.1_01        | Uncx-4.1                                               | 23 | 0 |
| V\$MAFB_01        | MAFB                                                                         | 22 | 0 | V\$EN2_01            | En-2                                       | 5 | 0 | V\$VAX1_01           | Vax-1                                                  | 23 | 0 |
| V\$MOVOB_01       | MOVO-B                                                                       | 22 | 0 | V\$ESX1_01           | Esx1                                       | 5 | 0 | V\$VAX2_01           | Vax-2                                                  | 23 | 0 |
| V\$MSX2_01        | Msx-2                                                                        | 22 | 0 | V\$ETF_Q6            | ETF                                        | 5 | 0 | V\$VSX1_01           | Vsx1                                                   | 23 | 0 |
| V\$NANOG_02       | Nanog                                                                        | 22 | 0 | V\$EVX1_01           | Evx-1                                      | 5 | 0 | V\$WT1_Q6            | WT1                                                    | 23 | 0 |
| V\$NFAT1_Q6       | NFAT1                                                                        | 22 | 0 | V\$EVX2_01           | Evx2                                       | 5 | 0 | MA0050.1             | IRF1                                                   | 22 | 0 |
| V\$NFAT2_Q5       | NF-AT2                                                                       | 22 | 0 | V\$GSC_01            | Gsc                                        | 5 | 0 | MA0055.1             | Myf                                                    | 22 | 0 |
| V\$NFAT_Q4_01     | NF-AT                                                                        | 22 | 0 | V\$GSH2_01           | GSH2                                       | 5 | 0 | MA0056.1             | MZF1_1-4                                               | 22 | 0 |
| V\$NKX29_01       | Nkx2-9                                                                       | 22 | 0 | V\$HAND1E47_01       | Hand1:E47 heterodimer                      | 5 | 0 | MA0079.2             | SP1                                                    | 22 | 0 |
| V\$NKX3A_02       | Nkx3A                                                                        | 22 | 0 | V\$HB9_01            | HB9                                        | 5 | 0 | MA0081.1             | SPIB                                                   | 22 | 0 |
| V\$NKX62_Q2       | NK related homeobox factor 6-2                                               | 22 | 0 | V\$HIC1_02           | HIC1                                       | 5 | 0 | MA0136.1             | ELF5                                                   | 22 | 0 |
| V\$NRSF_Q4        | NRSF                                                                         | 22 | 0 | V\$HLF_01            | hepatic leukemia factor                    | 5 | 0 | MA0154.1             | EBF1                                                   | 22 | 0 |

|                |                                                     |       |    |   |                 |           |   |   |              |                                                    |    |   |
|----------------|-----------------------------------------------------|-------|----|---|-----------------|-----------|---|---|--------------|----------------------------------------------------|----|---|
| V\$OCT2_01     |                                                     | 2-Oct | 22 | 0 | V\$HMBBOX1_01   | Hmbox1    | 5 | 0 | MA0156.1     | FEV                                                | 22 | 0 |
| V\$OG2_02      | OG-2                                                |       | 22 | 0 | V\$HOMEZ_01     | Homez     | 5 | 0 | V\$AREB6_04  | AREB6 (Atp1a1 regulatory element binding factor 6) | 22 | 0 |
| V\$OLF1_01     | olfactory neuron-specific factor                    |       | 22 | 0 | V\$HOXA11_01    | HOXA11    | 5 | 0 | V\$CDX_Q5    | Cdx                                                | 22 | 0 |
| V\$OTX3_01     | Otx3                                                |       | 22 | 0 | V\$HOXB5_01     | HoxB5     | 5 | 0 | V\$CHCH_01   | Churchill                                          | 22 | 0 |
| V\$PEBP_Q6     | PEBP                                                |       | 22 | 0 | V\$HOXC12_01    | HOXC12    | 5 | 0 | V\$CKROX_Q2  | CKROX                                              | 22 | 0 |
| V\$PMX2A_01    | PMX2A                                               |       | 22 | 0 | V\$HOXD11_01    | HOXD11    | 5 | 0 | V\$CRX_Q2    | Crx                                                | 22 | 0 |
| V\$POU2F3_01   | POU2F3                                              |       | 22 | 0 | V\$IK1_01       | Ikaros 1  | 5 | 0 | V\$E12_Q6    | E12                                                | 22 | 0 |
| V\$PTF1BETA_Q6 | PTF1-beta                                           |       | 22 | 0 | V\$IRF_Q6       | IRF       | 5 | 0 | V\$E47_01    | E47                                                | 22 | 0 |
| V\$RHOX11_01   | Rhox11                                              |       | 22 | 0 | V\$K2B_01       | K-2b      | 5 | 0 | V\$EGR_Q6    | Egr                                                | 22 | 0 |
| V\$S8_02       | S8                                                  |       | 22 | 0 | V\$LIM1_01      | Lim-1     | 5 | 0 | V\$EVX2_01   | Evx2                                               | 22 | 0 |
| V\$SATB1_Q3    | SATB1                                               |       | 22 | 0 | V\$MSX2_01      | Msx-2     | 5 | 0 | V\$FOXO3A_Q1 | FOXO3A                                             | 22 | 0 |
| V\$SOX9_Q4     | SOX9                                                |       | 22 | 0 | V\$MYC_Q2       | Myc       | 5 | 0 | V\$FRA1_Q5   | FRA1                                               | 22 | 0 |
| V\$SP1SP3_Q4   | SP1:SP3                                             |       | 22 | 0 | V\$NFKAPPA_B_01 | NF-kappaB | 5 | 0 | V\$IRF7_01   | interferon regulatory factor 7                     | 22 | 0 |
| V\$SP3_Q3      | Sp3                                                 |       | 22 | 0 | V\$NKX12_01     | Nkx1-2    | 5 | 0 | V\$LHX8_01   | Lhx8                                               | 22 | 0 |
| V\$STAT5A_03   | signal transducer and activator of transcription 5a |       | 22 | 0 | V\$NKX32_02     | Nkx3-2    | 5 | 0 | V\$LRF_Q2    | LRF                                                | 22 | 0 |
| V\$STAT6_01    | signal transducer and activator of transcription 6  |       | 22 | 0 | V\$NKX61_02     | NKX6.1    | 5 | 0 | V\$MAZ_Q6    | MAZ                                                | 22 | 0 |
| V\$STAT_Q6     | STAT                                                |       | 22 | 0 | V\$NKX63_01     | Nkx6-3    | 5 | 0 | V\$MZF1_Q5   | MZF1                                               | 22 | 0 |
| V\$TFIIQ_Q6    | TFII-I                                              |       | 22 | 0 | V\$NRSF_Q4      | NRSF      | 5 | 0 | V\$NFAT2_Q5  | NF-AT2                                             | 22 | 0 |
| V\$VAX2_01     | Vax-2                                               |       | 22 | 0 | V\$OBOX3_01     | Obox3     | 5 | 0 | V\$NKX21_01  | Nkx2-1                                             | 22 | 0 |
| MA0046.1       | HNF1A                                               |       | 21 | 0 | V\$OG2_02       | OG-2      | 5 | 0 | V\$NRSF_Q4   | NRSF                                               | 22 | 0 |
| MA0089.1       | NFE2L1::MafG                                        |       | 21 | 0 | V\$OTP_01       | OTP       | 5 | 0 | V\$PARP_Q3   | PARP                                               | 22 | 0 |
| MA0092.1       | Hand1::Tcfe2a                                       |       | 21 | 0 | V\$OTX3_01      | Otx3      | 5 | 0 | V\$PAX2_Q2   | paired box factor 2                                | 22 | 0 |
| MA0107.1       | RELA                                                |       | 21 | 0 | V\$PAX7_01      | Pax-7     | 5 | 0 | V\$SIX1_01   | Six-1                                              | 22 | 0 |
| MA0117.1       | Mafb                                                |       | 21 | 0 | V\$PREP1_01     | PREP1     | 5 | 0 | V\$SIX2_01   | Six-2                                              | 22 | 0 |

|                   |                                |    |   |                 |                                                    |   |   |                |                                          |    |   |
|-------------------|--------------------------------|----|---|-----------------|----------------------------------------------------|---|---|----------------|------------------------------------------|----|---|
| MA0145.1          | Tcfcp211                       | 21 | 0 | V\$PSX1_01      | PSX1                                               | 5 | 0 | V\$SIX3_01     | Six-3                                    | 22 | 0 |
| F\$AMT1_Q2        | AMT1                           | 21 | 0 | V\$RELP52_01    | kappaB site                                        | 5 | 0 | V\$SOX9_Q4     | SOX9                                     | 22 | 0 |
| V\$AP2REP_01      | AP-2 repressor                 | 21 | 0 | V\$REST_01      | NRSF, neuron-restrictive silencer factor           | 5 | 0 | V\$SOX_Q6      | SOX                                      | 22 | 0 |
| V\$CHCH_01        | Churchill                      | 21 | 0 | V\$REX1_03      | REX1                                               | 5 | 0 | V\$SP1SP3_Q4   | SP1:SP3                                  | 22 | 0 |
| V\$DLX1_01        | Dlx-1                          | 21 | 0 | V\$SHOX2_01     | Shox2                                              | 5 | 0 | V\$SP4_Q5      | SP4                                      | 22 | 0 |
| V\$DLX5_01        | dlx5                           | 21 | 0 | V\$SIX4_01      | six4                                               | 5 | 0 | V\$T3R_Q6      | half-site matrix                         | 22 | 0 |
| V\$EMX2_01        | EMX2                           | 21 | 0 | V\$STAT4_01     | signal transducer and activator of transcription 4 | 5 | 0 | V\$TAL1_01     | Tal-1 (ScI)                              | 22 | 0 |
| V\$ETF_Q6         | ETF                            | 21 | 0 | V\$TCF11MCFG_01 | TCF11:MafG heterodimers                            | 5 | 0 | V\$TCF4_01     | TCF-4                                    | 22 | 0 |
| V\$FOXO1_01       | fork head box O1               | 21 | 0 | V\$TFIIA_Q6     | TFIIA                                              | 5 | 0 | MA0151.1       | ARID3A                                   | 21 | 0 |
| V\$FOXO4_01       | fork head box O4               | 21 | 0 | V\$TRF1_01      | TRF1                                               | 5 | 0 | V\$AP1_Q6      | activator protein 1                      | 21 | 0 |
| V\$FREAC7_01      | Fork head RElated ACTivator-7  | 21 | 0 | V\$UF1H3BETA_Q6 | UF1H3BETA                                          | 5 | 0 | V\$AP2GAMMA_01 | AP-2gamma                                | 21 | 0 |
| V\$GABP_B         | GA binding protein             | 21 | 0 | V\$VAX2_01      | Vax-2                                              | 5 | 0 | V\$BRN2_01     | POU factor Brn-2                         | 21 | 0 |
| V\$GBX2_01        | Gbx2                           | 21 | 0 | V\$ZABC1_01     | ZABC1 b.s.                                         | 5 | 0 | V\$DMRT7_01    | DMRT7                                    | 21 | 0 |
| V\$GR_Q6          | glucocorticoid receptor        | 21 | 0 | V\$NKX23_01     | Nkx2-3                                             | 5 | 1 | V\$EAR2_Q2     | EAR2                                     | 21 | 0 |
| V\$GSC_01         | Gsc                            | 21 | 0 | V\$PXRXR_02     | PXR half-site                                      | 5 | 1 | V\$EBF_Q6      | EBF                                      | 21 | 0 |
| V\$HB9_01         | HB9                            | 21 | 0 | MA0007.1        | Ar                                                 | 4 | 0 | V\$ESE1_Q3     | ESE1                                     | 21 | 0 |
| V\$HNF1B_01       | HNF-1beta                      | 21 | 0 | MA0018.2        | CREB1                                              | 4 | 0 | V\$FLI1_Q6     | FLI1                                     | 21 | 0 |
| V\$HNF4_DR1_Q3    | HNF4 direct repeat 1           | 21 | 0 | MA0057.1        | MZF1_5-13                                          | 4 | 0 | V\$FOXO3_01    | fork head box O3                         | 21 | 0 |
| V\$HOXA3_02       | HOXA3                          | 21 | 0 | MA0058.1        | MAX                                                | 4 | 0 | V\$KROX_Q6     | KROX                                     | 21 | 0 |
| V\$HOXD11_01      | HOXD11                         | 21 | 0 | MA0062.2        | GABPA                                              | 4 | 0 | V\$NERF_Q2     | new ets-related factor 1a                | 21 | 0 |
| V\$HSF_Q6         | HSF                            | 21 | 0 | MA0069.1        | Pax6                                               | 4 | 0 | V\$PEA3_Q6     | PEA3                                     | 21 | 0 |
| V\$IRF7_01        | interferon regulatory factor 7 | 21 | 0 | V\$ALX3_01      | ALX-3                                              | 4 | 0 | V\$REST_01     | NRSF, neuron-restrictive silencer factor | 21 | 0 |
| V\$MAFA_Q4_01     | MAFA                           | 21 | 0 | V\$ATF_B        | ATF binding site                                   | 4 | 0 | V\$SIRT6_01    | SIRT6                                    | 21 | 0 |
| V\$NFKAPPA_B65_01 | NF-kappaB (p65)                | 21 | 0 | V\$BARHL1_01    | Barhl-1                                            | 4 | 0 | V\$SMAD1_01    | SMAD1                                    | 21 | 0 |

|                 |                                                                                   |    |   |               |                 |   |   |                      |                                                    |    |   |
|-----------------|-----------------------------------------------------------------------------------|----|---|---------------|-----------------|---|---|----------------------|----------------------------------------------------|----|---|
| V\$NRSE_B       | neural-restrictive-silencer-element                                               | 21 | 0 | V\$BARHL2_01  | Barhl2          | 4 | 0 | MA0144.1             | Stat3                                              | 20 | 0 |
| V\$OBOX2_01     | Obox2                                                                             | 21 | 0 | V\$BSX_01     | Bsx             | 4 | 0 | MA0152.1             | NFATC2                                             | 20 | 0 |
| V\$OBOX3_01     | Obox3                                                                             | 21 | 0 | V\$CDX1_01    | Cdx-1           | 4 | 0 | V\$CEBPGA_MMA_Q6     | C/EBPgamma                                         | 20 | 0 |
| V\$PAX8_B       | Pax-8 binding sites                                                               | 21 | 0 | V\$CDX2_01    | Cdx-2           | 4 | 0 | V\$FOXJ2_02          | fork head box J 2                                  | 20 | 0 |
| V\$PBX1_04      | Pbx1                                                                              | 21 | 0 | V\$CREBATF_Q6 | CREB, ATF       | 4 | 0 | V\$HP1SITEF_ACTOR_Q6 | HP1 site factor                                    | 20 | 0 |
| V\$PITX1_01     | Pitx1                                                                             | 21 | 0 | V\$DAX1_01    | Dax1            | 4 | 0 | V\$LMAF_Q2           | LMAF                                               | 20 | 0 |
| V\$PKNOX2_01    | PKNOX2                                                                            | 21 | 0 | V\$DBX2_01    | Dbx-2           | 4 | 0 | V\$MYOD_Q6_01        | MyoD                                               | 20 | 0 |
| V\$RAX_01       | rax                                                                               | 21 | 0 | V\$DLX7_01    | Dlx7            | 4 | 0 | V\$MYOGENIN_Q6       | myogenin                                           | 20 | 0 |
| V\$UF1H3BETA_Q6 | UF1H3BETA                                                                         | 21 | 0 | V\$DOBOX5_01  | Dobox5          | 4 | 0 | V\$NFE2_01           | NF-E2 p45                                          | 20 | 0 |
| V\$VDR_Q3       | vitamin D receptor; mediates vitamin D3-signaling, often dimerizes with RXR-alpha | 21 | 0 | V\$DR3_Q4     | direct repeat 3 | 4 | 0 | V\$NRF2_01           | nuclear respiratory factor 2                       | 20 | 0 |
| MA0061.1        | NF-kappaB                                                                         | 20 | 0 | V\$DR4_Q2     | direct repeat 4 | 4 | 0 | V\$UF1H3BETA_Q6      | UF1H3BETA                                          | 20 | 0 |
| MA0113.1        | NR3C1                                                                             | 20 | 0 | V\$E2F6_01    | E2F6            | 4 | 0 | V\$ZFP281_01         | Zfp281                                             | 20 | 0 |
| MA0114.1        | HNF4A                                                                             | 20 | 0 | V\$EGR_Q6     | Egr             | 4 | 0 | MA0143.1             | Sox2                                               | 19 | 0 |
| MA0119.1        | TLX1::NFIC                                                                        | 20 | 0 | V\$EN1_02     | En-1            | 4 | 0 | V\$ANTP_Q6_01        | Antp                                               | 19 | 0 |
| V\$ATF5_01      | ATF5 binding site                                                                 | 20 | 0 | V\$ERG_01     | ERG             | 4 | 0 | V\$GATA4_Q3          | GATA-4                                             | 19 | 0 |
| V\$CEBPE_01     | cebpe                                                                             | 20 | 0 | V\$GBX1_01    | Gbx1            | 4 | 0 | V\$HNF3ALPHA_Q6      | HNF3alpha                                          | 19 | 0 |
| V\$CTF1_01      | selection of the binding sites for CTCF by HOX11 cooperative DNA binding [2]      | 20 | 0 | V\$HDX_01     | Hdx             | 4 | 0 | V\$HSF_Q6            | HSF                                                | 19 | 0 |
| V\$DAX1_01      | Dax1                                                                              | 20 | 0 | V\$HNF1B_01   | HNF-1beta       | 4 | 0 | V\$MOVOB_01          | MOV0-B                                             | 19 | 0 |
| V\$DOBOX4_01    | Dobox4                                                                            | 20 | 0 | V\$HOX13_01   | HOXA5 (Hox-1.3) | 4 | 0 | V\$NRSE_B            | neural-restrictive-silencer-element                | 19 | 0 |
| V\$FAC1_01      | fetal Alz-50 clone 1                                                              | 20 | 0 | V\$HOXA1_01   | HOXA1           | 4 | 0 | V\$STAT_01           | signal transducers and activators of transcription | 19 | 0 |
| V\$FOXO3_01     | fork head box O3                                                                  | 20 | 0 | V\$HOXA7_03   | HOXA7           | 4 | 0 | V\$TATA_C            | Retroviral TATA box                                | 19 | 0 |
| V\$HOXC11_01    | HOXC11                                                                            | 20 | 0 | V\$HOXB3_01   | HOXB3           | 4 | 0 | V\$TFIII_Q6          | TFII-I                                             | 19 | 0 |



|                  |                              |    |   |              |                                        |   |   |                       |                                                                       |    |   |
|------------------|------------------------------|----|---|--------------|----------------------------------------|---|---|-----------------------|-----------------------------------------------------------------------|----|---|
| V\$IRX5_01       | Irx5                         | 20 | 0 | V\$HOXB6_01  | HOXB6                                  | 4 | 0 | MA0113.1              | NR3C1                                                                 | 18 | 0 |
| V\$IRXB3_01      | IRXB3                        | 20 | 0 | V\$HOXB7_01  | HOXB7                                  | 4 | 0 | V\$AP1FJ_Q2           | activator protein 1                                                   | 18 | 0 |
| V\$KID3_01       | Kid3                         | 20 | 0 | V\$HOXB8_01  | HOXB8                                  | 4 | 0 | V\$ERG_01             | ERG                                                                   | 18 | 0 |
| V\$KLF15_Q2      | KLF15                        | 20 | 0 | V\$HOXC10_01 | HOXC10                                 | 4 | 0 | V\$FREAC2_01          | Fork head RElated ACTivator-2                                         | 18 | 0 |
| V\$KROX_Q6       | KROX                         | 20 | 0 | V\$HOXC11_01 | HOXC11                                 | 4 | 0 | V\$FREAC3_01          | Fork head RElated ACTivator-3                                         | 18 | 0 |
| V\$MAF_Q6_01     | MAF                          | 20 | 0 | V\$HOXC8_01  | HOXC-8                                 | 4 | 0 | V\$GAF_Q6             | GAF                                                                   | 18 | 0 |
| V\$MEF2_Q6_01    | MEF-2                        | 20 | 0 | V\$HOXC9_01  | HOXC9                                  | 4 | 0 | V\$HELIOSA_02         | Helios A                                                              | 18 | 0 |
| V\$NFKAPPA_B_01  | NF-kappaB                    | 20 | 0 | V\$HOXD12_01 | HOXD12                                 | 4 | 0 | V\$LMO2CO_M_01        | complex of Lmo2 bound to Tal-1, E2A proteins, and GATA-1, half-site 1 | 18 | 0 |
| V\$NKX23_01      | Nkx2-3                       | 20 | 0 | V\$HOXD1_01  | HOXD1                                  | 4 | 0 | V\$P53_03             | tumor suppressor p53                                                  | 18 | 0 |
| V\$NUR77_Q5      | NUR77                        | 20 | 0 | V\$HOXD3_01  | HOXD3                                  | 4 | 0 | V\$PTF1BET_A_Q6       | PTF1-beta                                                             | 18 | 0 |
| V\$PPAR_DR_1_Q2  | PPAR direct repeat 1         | 20 | 0 | V\$HSF_Q6    | HSF                                    | 4 | 0 | V\$TEL2_Q6            | Tel-2                                                                 | 18 | 0 |
| V\$RELB_P52_01   | kappaB site                  | 20 | 0 | V\$IK3_01    | Ikaros 3                               | 4 | 0 | V\$ZFP206_01          | Zfp206                                                                | 18 | 0 |
| V\$SIX4_01       | six4                         | 20 | 0 | V\$IPF1_06   | ipf1                                   | 4 | 0 | MA0046.1              | HNF1A                                                                 | 17 | 0 |
| V\$SMAD_Q6       | SMAD                         | 20 | 0 | V\$ISRE_01   | interferon-stimulated response element | 4 | 0 | V\$BACH2_01           | BTB and CNC homolog 2                                                 | 17 | 0 |
| V\$TCF11M_AFG_01 | TCF11:MafG heterodimers      | 20 | 0 | V\$ISX_01    | isx                                    | 4 | 0 | V\$FOX_D3_01          | fork head box D3                                                      | 17 | 0 |
| V\$TGIF_02       | TGIF1                        | 20 | 0 | V\$Lbx2_01   | Lbx2                                   | 4 | 0 | V\$HNF3/Fkh_Homolog_1 | HNF-3/Fkh Homolog 1                                                   | 17 | 0 |
| V\$BRN2_01       | POU factor Brn-2             | 19 | 0 | V\$LH2_01    | LH-2                                   | 4 | 0 | V\$KLF15_Q2           | KLF15                                                                 | 17 | 0 |
| V\$CACD_01       | CACD                         | 19 | 0 | V\$LHX4_01   | Lhx4                                   | 4 | 0 | V\$LFA1_Q6            | LF-A1                                                                 | 17 | 0 |
| V\$GFI1_01       | growth factor independence 1 | 19 | 0 | V\$Lmx1_01   | Lmx-1                                  | 4 | 0 | V\$NFKB_Q6_01         | NF-kappaB                                                             | 17 | 0 |
| V\$HOXC10_01     | HOXC10                       | 19 | 0 | V\$Lmx1B_01  | lmx1b                                  | 4 | 0 | V\$SOX2-Oct4          | Sox2-Oct4 joint motif, in silico predicted                            | 17 | 0 |
| V\$LRF_Q2        | LRF                          | 19 | 0 | V\$MEIS1_02  | Meis1                                  | 4 | 0 | V\$PITX3_01           | Pitx3                                                                 | 17 | 0 |
| V\$MEIS1_02      | Meis1                        | 19 | 0 | V\$MIBP1_01  | MIBP-1 / RFX1 complex                  | 4 | 0 | V\$TCF3_01            | TCF-3                                                                 | 17 | 0 |
| V\$MEIS2_01      | Meis2                        | 19 | 0 | V\$MOX1_01   | Mox1                                   | 4 | 0 | MA0039.2              | Klf4                                                                  | 16 | 0 |
| V\$NKX22_02      | NKX22                        | 19 | 0 | V\$MRG2_01   | MRG2                                   | 4 | 0 | MA0051.1              | IRF2                                                                  | 16 | 0 |

|                |                                       |    |   |                |                                                     |   |   |                                |                                          |    |   |
|----------------|---------------------------------------|----|---|----------------|-----------------------------------------------------|---|---|--------------------------------|------------------------------------------|----|---|
| V\$NKX32_02    | Nkx3-2                                | 19 | 0 | V\$MSX1_02     | Msx-1                                               | 4 | 0 | MA0052.1                       | MEF2A                                    | 16 | 0 |
| V\$OBOX1_01    | Obox1                                 | 19 | 0 | V\$NCX_01      | Ncx                                                 | 4 | 0 | MA0135.1                       | Lhx3                                     | 16 | 0 |
| V\$P53_03      | tumor suppressor p53                  | 19 | 0 | V\$NURR1_Q3    | NURR1                                               | 4 | 0 | V\$BACH1_01                    | BTB and CNC homolog 1                    | 16 | 0 |
| V\$PARP_Q3     | PARP                                  | 19 | 0 | V\$OBOX1_01    | Obox1                                               | 4 | 0 | V\$CACBINDI<br>NGPROTEIN<br>Q6 | CAC-binding protein                      | 16 | 0 |
| V\$RBPJK_Q4    | RBP-Jkappa                            | 19 | 0 | V\$OBOX2_01    | Obox2                                               | 4 | 0 | V\$COMP1_01                    | COMP1                                    | 16 | 0 |
| V\$SRY_02      | sex-determining region Y gene product | 19 | 0 | V\$OBOX6_01    | Obox6                                               | 4 | 0 | V\$FOX_Q2                      | FOX factors                              | 16 | 0 |
| V\$TEF1_Q6     | TEF-1                                 | 19 | 0 | V\$OCT1_08     | 1-Oct                                               | 4 | 0 | V\$FOX_P3_01                   | forkhead box P3                          | 16 | 0 |
| V\$TGIF2_01    | TGIF2                                 | 19 | 0 | V\$OTX1_01     | Otx1                                                | 4 | 0 | V\$GFI1_01                     | growth factor independence 1             | 16 | 0 |
| MA0051.1       | IRF2                                  | 18 | 0 | V\$OTX2_01     | Otx2                                                | 4 | 0 | V\$PXR_RXR_01                  | RXR half-site                            | 16 | 0 |
| MA0152.1       | NFATC2                                | 18 | 0 | V\$PBX1_04     | Pbx1                                                | 4 | 0 | V\$SRRFC4_01                   | related to serum response factor, C4     | 16 | 0 |
| V\$CPHX_01     | Cphx                                  | 18 | 0 | V\$PITX1_01    | Pitx1                                               | 4 | 0 | V\$ATF5_01                     | ATF5 binding site                        | 15 | 0 |
| V\$DRI1_01     | DRI1 b.s.                             | 18 | 0 | V\$PITX2_01    | PITX2                                               | 4 | 0 | V\$CDC5_01                     | cell division control protein 5          | 15 | 0 |
| V\$FOXO3A_Q1   | FOXO3A                                | 18 | 0 | V\$PITX3_01    | Pitx3                                               | 4 | 0 | V\$CIZ_01                      | CIZ (Cas-associated zinc finger protein) | 15 | 0 |
| V\$HAND1E47_01 | Hand1:E47 heterodimer                 | 18 | 0 | V\$PMX2A_01    | PMX2A                                               | 4 | 0 | V\$E2F_Q2                      | E2F                                      | 15 | 0 |
| V\$HMGIIY_Q3   | HMGIIY                                | 18 | 0 | V\$POU6F1_Q2   | POU6F1                                              | 4 | 0 | V\$GADP_01                     | Growth-associated binding protein        | 15 | 0 |
| V\$HOXC12_01   | HOXC12                                | 18 | 0 | V\$PPAR_DR1_Q2 | PPAR direct repeat 1                                | 4 | 0 | V\$GR_Q6                       | glucocorticoid receptor                  | 15 | 0 |
| V\$HOXD12_01   | HOXD12                                | 18 | 0 | V\$PPARA_Q6    | half-site                                           | 4 | 0 | V\$HMEF2_Q6                    | myocyte enhancer factor                  | 15 | 0 |
| V\$IK1_01      | Ikaros 1                              | 18 | 0 | V\$PR_02       | progesterone receptor                               | 4 | 0 | V\$PAX8_B                      | Pax-8 binding sites                      | 15 | 0 |
| V\$ISX_01      | isx                                   | 18 | 0 | V\$RFX1_01     | X-box binding protein RFX1                          | 4 | 0 | V\$PUR1_Q4                     | PUR1                                     | 15 | 0 |
| V\$MRG2_01     | MRG2                                  | 18 | 0 | V\$SIX1_01     | Six-1                                               | 4 | 0 | V\$RNF96_01                    | RNF96                                    | 15 | 0 |
| V\$NFAT3_Q3    | NFAT3                                 | 18 | 0 | V\$SIX2_01     | Six-2                                               | 4 | 0 | MA0030.1                       | FOXF2                                    | 14 | 0 |
| V\$NKX11_01    | Nkx1-1                                | 18 | 0 | V\$SIX6_01     | Six-6                                               | 4 | 0 | MA0040.1                       | Foxq1                                    | 14 | 0 |
| V\$OBOX6_01    | Obox6                                 | 18 | 0 | V\$SPZ1_01     | spermatogenic Zip                                   | 4 | 0 | MA0060.1                       | NFYA                                     | 14 | 0 |
| V\$PREP1_01    | PREP1                                 | 18 | 0 | V\$STAT5A_01   | signal transducer and activator of transcription 5a | 4 | 0 | MA0075.1                       | Prrx2                                    | 14 | 0 |

|                     |                                         |    |   |                |                                                         |   |   |                     |                                            |    |   |
|---------------------|-----------------------------------------|----|---|----------------|---------------------------------------------------------|---|---|---------------------|--------------------------------------------|----|---|
| V\$TCF11_01         | TCF11/KCR-F1/Nrf1 homodimers            | 18 | 0 | V\$SZF11_01    | SZF1-1                                                  | 4 | 0 | V\$CEBPB_01         | CCAAT/enhancer binding protein beta        | 14 | 0 |
| MA0038.1            | Gfi                                     | 17 | 0 | V\$TGIF2_01    | TGIF2                                                   | 4 | 0 | V\$GABP_B           | GA binding protein                         | 14 | 0 |
| MA0112.2            | ESR1                                    | 17 | 0 | V\$VAX1_01     | Vax-1                                                   | 4 | 0 | V\$HSF1_Q6          | HSF1                                       | 14 | 0 |
| MA0148.1            | FOXA1                                   | 17 | 0 | V\$ZIC2_01     | zinc finger protein of the cerebellum 2                 | 4 | 0 | V\$IRF8_Q6          | IRF8                                       | 14 | 0 |
| MA0155.1            | INSM1                                   | 17 | 0 | V\$DLX1_01     | IRF2                                                    | 3 | 0 | V\$MAF_Q6           | MAF                                        | 14 | 0 |
| V\$ALPHACP1_01      | alpha-CP1                               | 17 | 0 | V\$HOXA3_02    | znf143                                                  | 3 | 0 | V\$SMAD3_Q6         | SMAD3                                      | 14 | 0 |
| V\$ATF3_Q6          | activating transcription factor 3       | 17 | 0 | V\$HOXA9_01    | Egr1                                                    | 3 | 0 | V\$TAL1ALP_HAE47_01 | Tal-1alpha:E47 heterodimer                 | 14 | 0 |
| V\$COUP_D_R1_Q6     | COUP direct repeat 1                    | 17 | 0 | V\$HOXC13_01   | ESR2                                                    | 3 | 0 | V\$ZBED6_01         | ZBED6                                      | 14 | 0 |
| V\$EBOX_Q6_01       | Ebox                                    | 17 | 0 | V\$MSX3_01     | aryl hydrocarbon receptor:Arnt heterodimers, fixed core | 3 | 0 | MA0048.1            | NHLH1                                      | 13 | 0 |
| V\$EHF_01           | EHF                                     | 17 | 0 | V\$NKX29_01    | ATF1                                                    | 3 | 0 | MA0065.2            | PPARG::RXRA                                | 13 | 0 |
| V\$GLI3_Q5_01       | GLI3                                    | 17 | 0 | V\$NKX3A_02    | COUP direct repeat 1                                    | 3 | 0 | V\$BRCA_01          | BRCA1 containing protein complex with USF2 | 13 | 0 |
| V\$IRX2_01          | Irx2                                    | 17 | 0 | V\$OBOX5_01    | Dbx-1                                                   | 3 | 0 | V\$E2F1DP1_RB_01    | Rb:E2F-1:DP-1 trimeric complex             | 13 | 0 |
| V\$LHX8_01          | Lhx8                                    | 17 | 0 | MA0051.1       | DEAF1                                                   | 3 | 0 | V\$E2F4DP2_01       | E2F-4:DP-2 heterodimer                     | 13 | 0 |
| V\$NKX26_01         | Nkx2-6                                  | 17 | 0 | MA0088.1       | E2F-1:DP-1 heterodimer                                  | 3 | 0 | V\$NFMUE1_Q6        | NF-muE1                                    | 13 | 0 |
| V\$P50P50_Q3        | P50:P50                                 | 17 | 0 | MA0162.1       | RFX1 (EF-C)                                             | 3 | 0 | V\$USF_Q6_01        | USF                                        | 13 | 0 |
| V\$SIRT6_01         | SIRT6                                   | 17 | 0 | MA0258.1       | early growth response gene 3 product                    | 3 | 0 | MA0002.2            | RUNX1                                      | 12 | 0 |
| V\$SIX6_01          | Six-6                                   | 17 | 0 | V\$AHRARNT_02  | EHF                                                     | 3 | 0 | MA0031.1            | FOXD1                                      | 12 | 0 |
| V\$SMAD1_01         | SMAD1                                   | 17 | 0 | V\$ATF1_Q6     | FXR inverted repeat 1                                   | 3 | 0 | MA0041.1            | Foxd3                                      | 12 | 0 |
| V\$TAL1ALP_HAE47_01 | Tal-1alpha:E47 heterodimer              | 17 | 0 | V\$COUP_DR1_Q6 | GATA-binding factor 1                                   | 3 | 0 | MA0062.2            | GABPA                                      | 12 | 0 |
| MA0093.1            | USF1                                    | 16 | 0 | V\$DBX1_01     | GCM                                                     | 3 | 0 | MA0145.1            | Tcfcp2l1                                   | 12 | 0 |
| MA0143.1            | Sox2                                    | 16 | 0 | V\$DEAF1_01    | HES1                                                    | 3 | 0 | MA0158.1            | HOXA5                                      | 12 | 0 |
| V\$CREBP1C_JUN_01   | CRE-binding protein 1:c-Jun heterodimer | 16 | 0 | V\$E2F1DP1_01  | HOXA13                                                  | 3 | 0 | V\$AFP1_Q6          | AFP1                                       | 12 | 0 |
| V\$EVX2_01          | Evx2                                    | 16 | 0 | V\$EFC_Q6      | HoxA2                                                   | 3 | 0 | V\$DR1_Q3           | Direct repeat 1                            | 12 | 0 |
| V\$HEN1_01          | HEN1                                    | 16 | 0 | V\$EGR3_01     | HOXA6                                                   | 3 | 0 | V\$HNF6_Q6          | HNF6                                       | 12 | 0 |

|               |                                                |    |   |                |                                                     |   |   |                          |                                         |    |   |
|---------------|------------------------------------------------|----|---|----------------|-----------------------------------------------------|---|---|--------------------------|-----------------------------------------|----|---|
| V\$HSF1_Q6    | HSF1                                           | 16 | 0 | V\$EHF_01      | HOXB9                                               | 3 | 0 | V\$MAFA_Q4_01            | MAFA                                    | 12 | 0 |
| V\$IRX3_01    | Irx-3                                          | 16 | 0 | V\$FXR_IR1_Q6  | IRF3                                                | 3 | 0 | V\$MAZR_01               | MAZ related factor                      | 12 | 0 |
| V\$OSF2_Q6    | Osf2                                           | 16 | 0 | V\$GATA1_01    | interferon regulatory factor 7                      | 3 | 0 | V\$P50RELA_P65_Q5_01     | P50:RELA-P65                            | 12 | 0 |
| MA0067.1      | Pax2                                           | 15 | 0 | V\$GCM_Q2      | Isl2                                                | 3 | 0 | V\$PLZF_02               | PLZF                                    | 12 | 0 |
| V\$AML2_01    | AML2                                           | 15 | 0 | V\$HES1_Q2     | LXR                                                 | 3 | 0 | V\$POU1F1_Q6             | POU1F1                                  | 12 | 0 |
| V\$BCL6_01    | BCL6                                           | 15 | 0 | V\$HOXA13_03   | modulator recognition factor 2                      | 3 | 0 | V\$SP3_Q3                | Sp3                                     | 12 | 0 |
| V\$COMP1_01   | COMP1                                          | 15 | 0 | V\$HOXA2_01    | MYB                                                 | 3 | 0 | MA0101.1                 | REL                                     | 11 | 0 |
| V\$CRX_02     | Crx                                            | 15 | 0 | V\$HOXA6_01    | c-Myc:Max heterodimer                               | 3 | 0 | V\$CREL_01               | c-Rel                                   | 11 | 0 |
| V\$HFH1_01    | HNF-3/Fkh Homolog 1                            | 15 | 0 | V\$HOXB9_01    | NF-Y binding site                                   | 3 | 0 | V\$E2F4DP1_01            | E2F-4:DP-1 heterodimer                  | 11 | 0 |
| V\$P300_01    | p300                                           | 15 | 0 | V\$IRF3_Q3     | Nkx2-1                                              | 3 | 0 | V\$NFY_01                | nuclear factor Y (Y-box binding factor) | 11 | 0 |
| V\$PITX3_01   | Pitx3                                          | 15 | 0 | V\$IRF7_01     | NKX22                                               | 3 | 0 | MA0038.1                 | Gfi                                     | 10 | 0 |
| V\$RFX1_02    | X-box binding protein RFX1                     | 15 | 0 | V\$ISL2_01     | Nkx2-5                                              | 3 | 0 | MA0047.2                 | Foxa2                                   | 10 | 0 |
| MA0060.1      | NFYA                                           | 14 | 0 | V\$LXR_Q3      | Nkx2-6                                              | 3 | 0 | MA0114.1                 | HNF4A                                   | 10 | 0 |
| MA0062.2      | GABPA                                          | 14 | 0 | V\$MRF2_01     | Pax                                                 | 3 | 0 | V\$HFH8_01               | HNF-3/Fkh Homolog-8                     | 10 | 0 |
| MA0159.1      | RXR::RAR_DR5                                   | 14 | 0 | V\$MYB_Q5_01   | PTF1-beta                                           | 3 | 0 | V\$SOX5_01               | Sox-5                                   | 10 | 0 |
| V\$COUPTF_Q6  | COUPTF                                         | 14 | 0 | V\$MYCMAX_03   | RFX                                                 | 3 | 0 | MA0107.1                 | RELA                                    | 9  | 0 |
| V\$FOXJ2_01   | fork head box J 2                              | 14 | 0 | V\$NFY_C       | Six-3                                               | 3 | 0 | MA0148.1                 | FOXA1                                   | 9  | 0 |
| V\$LRH1_Q5    | LRH1                                           | 14 | 0 | V\$NKX21_01    | Se-Cys tRNA gene transcription activating factor    | 3 | 0 | V\$CACCCBINDINGFACTOR_Q6 | CACCC-binding factor                    | 9  | 0 |
| V\$MYOGNF1_01 | myogenin / nuclear factor 1 or related factors | 14 | 0 | V\$NKX22_02    | signal transducer and activator of transcription 5b | 3 | 0 | V\$CACD_01               | CACD                                    | 9  | 0 |
| V\$NFY_01     | nuclear factor Y (Y-box binding factor)        | 14 | 0 | V\$NKX25_Q5    | Tax/CREB complex                                    | 3 | 0 | V\$DAX1_01               | Dax1                                    | 9  | 0 |
| V\$NKX21_01   | Nkx2-1                                         | 14 | 0 | V\$NKX26_01    | Yin and Yang 1                                      | 3 | 0 | V\$E2F1DP1_01            | E2F-1:DP-1 heterodimer                  | 9  | 0 |
| V\$PPARA_Q6   | half-site                                      | 14 | 0 | V\$PAX_Q6      | zinc finger protein of the cerebellum 1             | 3 | 0 | V\$ER_Q6_02              | half-site matrix, half-ERE              | 9  | 0 |
| V\$RSRFC4_Q2  | RSRFC4                                         | 14 | 0 | V\$PTF1BETA_Q6 | IRF1                                                | 3 | 1 | V\$FOXJ3_01              | foxj3                                   | 9  | 0 |
| MA0047.2      | Foxa2                                          | 13 | 0 | V\$RFX_Q6      | alpha-CP1                                           | 3 | 1 | V\$HSF2_01               | heat shock factor 2                     | 9  | 0 |

|                     |                                                     |    |   |                |                                                    |   |   |                      |                                                                                   |   |   |
|---------------------|-----------------------------------------------------|----|---|----------------|----------------------------------------------------|---|---|----------------------|-----------------------------------------------------------------------------------|---|---|
| V\$CEBPDEL<br>TA_Q6 | C/EBPdelta                                          | 13 | 0 | V\$SIX3_01     | AREB6 (Atp1a1 regulatory element binding factor 6) | 3 | 1 | V\$P50P50_Q3         | P50:P50                                                                           | 9 | 0 |
| V\$GATA4_Q3         | GATA-4                                              | 13 | 0 | V\$STAF_01     | Cphx                                               | 3 | 1 | V\$STAT5B_01         | signal transducer and activator of transcription 5b                               | 9 | 0 |
| V\$HFH8_01          | HNF-3/Fkh Homolog-8                                 | 13 | 0 | V\$STAT5B_01   | Dlx-2                                              | 3 | 1 | V\$VDR_Q3            | vitamin D receptor; mediates vitamin D3-signaling, often dimerizes with RXR-alpha | 9 | 0 |
| V\$HNF3ALP<br>HA_Q6 | HNF3alpha                                           | 13 | 0 | V\$TAXCREB_02  | dlx3                                               | 3 | 1 | MA0025.1             | NFIL3                                                                             | 8 | 0 |
| V\$MAZR_01          | MAZ related factor                                  | 13 | 0 | V\$YY1_02      | Dobox4                                             | 3 | 1 | MA0057.1             | MZF1_5-13                                                                         | 8 | 0 |
| V\$NKX24_01         | Nkx2-4                                              | 13 | 0 | V\$ZIC1_01     | HB24                                               | 3 | 1 | MA0061.1             | NF-kappaB                                                                         | 8 | 0 |
| V\$NKX25_03         | NKX25                                               | 13 | 0 | MA0050.1       | HOXA10                                             | 3 | 1 | MA0142.1             | Pou5f1                                                                            | 8 | 0 |
| V\$OCT4_01          | Sox2-Oct4 joint motif, in silico predicted          | 13 | 0 | V\$ALPHACP1_01 | NK related homeobox factor 6-2                     | 3 | 5 | V\$CREB_01           | cAMP-responsive element binding protein                                           | 8 | 0 |
| V\$SOX_Q6           | SOX                                                 | 13 | 0 | V\$AREB6_04    | NR2F1                                              | 2 | 0 | V\$CREBP1C<br>JUN_01 | CRE-binding protein 1:c-Jun heterodimer                                           | 8 | 0 |
| V\$STAT5B_01        | signal transducer and activator of transcription 5b | 13 | 0 | V\$CPHX_01     | MYC::MAX                                           | 2 | 0 | V\$DR4_Q2            | direct repeat 4                                                                   | 8 | 0 |
| V\$ZIC3_01          | zinc finger protein of the cerebellum 3             | 13 | 0 | V\$DLX2_01     | RREB1                                              | 2 | 0 | V\$FOXP1_01          | FOXP1                                                                             | 8 | 0 |
| MA0014.1            | Pax5                                                | 12 | 0 | V\$DLX3_01     | ZEB1                                               | 2 | 0 | V\$HNF3A_01          | FOXA1                                                                             | 8 | 0 |
| V\$ATF4_Q2          | activating transcription factor 4                   | 12 | 0 | V\$DOBOX4_01   | Mycn                                               | 2 | 0 | V\$LTF_Q6            | LTF                                                                               | 8 | 0 |
| V\$ERG_01           | ERG                                                 | 12 | 0 | V\$HB24_01     | NFKB1                                              | 2 | 0 | V\$NFKAPPA<br>B65_01 | NF-kappaB (p65)                                                                   | 8 | 0 |
| V\$FOXP3_Q4         | FOXP3                                               | 12 | 0 | V\$HOXA10_01   | HNF4A                                              | 2 | 0 | V\$NFKAPPA<br>B_01   | NF-kappaB                                                                         | 8 | 0 |
| V\$PAX_Q6           | Pax                                                 | 12 | 0 | V\$NKX62_Q2    | Zfp423                                             | 2 | 0 | V\$OTX_Q1            | OTX                                                                               | 8 | 0 |
| MA0017.1            | NR2F1                                               | 11 | 0 | MA0017.1       | Pou5f1                                             | 2 | 0 | V\$PPAR_DR<br>1_Q2   | PPAR direct repeat 1                                                              | 8 | 0 |
| MA0135.1            | Lhx3                                                | 11 | 0 | MA0059.1       | Myc                                                | 2 | 0 | V\$RBPJK_Q4          | RBP-Jkappa                                                                        | 8 | 0 |
| V\$CEBPGA<br>MMA_Q6 | C/EBPgamma                                          | 11 | 0 | MA0073.1       | NR4A2                                              | 2 | 0 | MA0063.1             | Nkx2-5                                                                            | 7 | 0 |
| V\$DMRT7_01         | DMRT7                                               | 11 | 0 | MA0103.1       | ATF5 binding site                                  | 2 | 0 | MA0087.1             | Sox5                                                                              | 7 | 0 |
| V\$ERR2_01          | ERR2 (ESRRB)                                        | 11 | 0 | MA0104.2       | BCL6                                               | 2 | 0 | MA0150.1             | NFE2L2                                                                            | 7 | 0 |
| V\$FREAC3_01        | Fork head RElated ACTivator-3                       | 11 | 0 | MA0105.1       | c-Myc heterodimer (with a 26-29 kDa factor)        | 2 | 0 | V\$AIRE_01           | AIRE                                                                              | 7 | 0 |
| V\$HIC1_02          | HIC1                                                | 11 | 0 | MA0114.1       | cAMP-responsive element binding protein 1          | 2 | 0 | V\$CNOT3_01          | CNOT3                                                                             | 7 | 0 |

|                  |                                                       |    |   |               |                                                  |   |   |                   |                                           |   |   |
|------------------|-------------------------------------------------------|----|---|---------------|--------------------------------------------------|---|---|-------------------|-------------------------------------------|---|---|
| V\$HMEF2_Q6      | myocyte enhancer factor                               | 11 | 0 | MA0116.1      | Egr-2/Krox-20 early growth response gene product | 2 | 0 | V\$CREBP1_01      | cAMP-responsive element binding protein 1 | 7 | 0 |
| V\$RFX3_01       | RFX3 dimer                                            | 11 | 0 | MA0142.1      | fork head box O1                                 | 2 | 0 | V\$DMRT2_01       | DMRT2                                     | 7 | 0 |
| V\$SIX1_01       | Six-1                                                 | 11 | 0 | MA0147.1      | Glucocorticoid response element                  | 2 | 0 | V\$HIC1_02        | HIC1                                      | 7 | 0 |
| V\$SIX2_01       | Six-2                                                 | 11 | 0 | MA0160.1      | hypoxia-inducible factor 1                       | 2 | 0 | V\$KAISO_01       | KAISO                                     | 7 | 0 |
| V\$SIX3_01       | Six-3                                                 | 11 | 0 | V\$ATF5_01    | ICSBP                                            | 2 | 0 | V\$OCT_C          | Octamer binding site                      | 7 | 0 |
| V\$STAT3STAT3_Q3 | STAT3:STAT3                                           | 11 | 0 | V\$BCL6_02    | LRH1                                             | 2 | 0 | V\$OLF1_01        | olfactory neuron-specific factor          | 7 | 0 |
| V\$TBP_01        | TATA binding protein                                  | 11 | 0 | V\$CMYC_02    | MAZ related factor                               | 2 | 0 | V\$SP2_01         | SP2                                       | 7 | 0 |
| V\$ZFP206_01     | Zfp206                                                | 11 | 0 | V\$CREBP1_01  | NF-AT                                            | 2 | 0 | V\$STAT3STAT3_Q3  | STAT3:STAT3                               | 7 | 0 |
| MA0040.1         | Foxq1                                                 | 10 | 0 | V\$EGR2_01    | Nkx2-4                                           | 2 | 0 | MA0042.1          | FOX11                                     | 6 | 0 |
| MA0052.1         | MEF2A                                                 | 10 | 0 | V\$FOXO1_02   | nuclear respiratory factor 1                     | 2 | 0 | MA0073.1          | RREB1                                     | 6 | 0 |
| MA0057.1         | MZF1_5-13                                             | 10 | 0 | V\$GRE_C      | neural-restrictive-silencer-element              | 2 | 0 | MA0076.1          | ELK4                                      | 6 | 0 |
| MA0073.1         | RREB1                                                 | 10 | 0 | V\$HIF1_Q5    | NUR77                                            | 2 | 0 | V\$DMRT4_01       | DMRT4                                     | 6 | 0 |
| V\$CREB_01       | cAMP-responsive element binding protein               | 10 | 0 | V\$ICSBP_Q6   | Pax-3 binding sites                              | 2 | 0 | V\$E2F1DP2_01     | E2F-1:DP-2 heterodimer                    | 6 | 0 |
| V\$DR3_Q4        | direct repeat 3                                       | 10 | 0 | V\$LRH1_Q5    | Pbx                                              | 2 | 0 | V\$E4BP4_01       | E4BP4                                     | 6 | 0 |
| V\$FREAC2_01     | Fork head RElated ACTivator-2                         | 10 | 0 | V\$MAZR_01    | half-site matrix                                 | 2 | 0 | V\$EHF_01         | EHF                                       | 6 | 0 |
| V\$ZABC1_01      | ZABC1 b.s.                                            | 10 | 0 | V\$NFAT_Q4_01 | RFX3 dimer                                       | 2 | 0 | V\$HNF4_01        | hepatic nuclear factor 4                  | 6 | 0 |
| MA0258.1         | ESR2                                                  | 9  | 0 | V\$NKX24_01   | RNF96                                            | 2 | 0 | V\$NFKAPPA_B50_01 | NF-kappaB (p50)                           | 6 | 0 |
| V\$BRCA_01       | BRCA1 containing protein complex with USF2            | 9  | 0 | V\$NRF1_Q6    | SF1                                              | 2 | 0 | V\$PR_Q2          | half-site matrix                          | 6 | 0 |
| V\$DR4_Q2        | direct repeat 4                                       | 9  | 0 | V\$NRSE_B     | SOX                                              | 2 | 0 | V\$RELB52_01      | kappaB site                               | 6 | 0 |
| V\$FXR_Q2        | half-site                                             | 9  | 0 | V\$NUR77_Q5   | SP1:SP3                                          | 2 | 0 | V\$TFEB_01        | TFEB                                      | 6 | 0 |
| V\$GFI1B_01      | Gfi1b                                                 | 9  | 0 | V\$PAX3_B     | serum response factor                            | 2 | 0 | V\$TFIIA_Q6       | TFIIA                                     | 6 | 0 |
| V\$HNF3A_01      | FOXA1                                                 | 9  | 0 | V\$PBX_Q3     | STAT1:STAT1                                      | 2 | 0 | MA0125.1          | Nobox                                     | 5 | 0 |
| V\$PR_01         | high affinity binding sites for progesterone receptor | 9  | 0 | V\$PXR_Q2     | Tal-1alpha:E47 heterodimer                       | 2 | 0 | V\$ALPHACP1_01    | alpha-CP1                                 | 5 | 0 |
| V\$PXR_Q2        | half-site matrix                                      | 9  | 0 | V\$RFX3_01    | Tcf-4 dimer                                      | 2 | 0 | V\$CEBPDDELTA_Q6  | C/EBPdelta                                | 5 | 0 |

|                    |                                           |   |   |                 |                                            |   |   |                 |                                   |   |   |
|--------------------|-------------------------------------------|---|---|-----------------|--------------------------------------------|---|---|-----------------|-----------------------------------|---|---|
| V\$REX1_03         | REX1                                      | 9 | 0 | V\$RNF96_01     | Zfp206                                     | 2 | 0 | V\$CEBPE_01     | cebpe                             | 5 | 0 |
| MA0004.1           | Arnt                                      | 8 | 0 | V\$SF1_Q6       | zinc finger with interaction domain        | 2 | 0 | V\$CMAF_02      | C-MAF                             | 5 | 0 |
| MA0151.1           | ARID3A                                    | 8 | 0 | V\$NFAT2_Q5     | NFIL3                                      | 1 | 0 | V\$CP2_01       | CP2                               | 5 | 0 |
| MA0160.1           | NR4A2                                     | 8 | 0 | V\$PLAG1_01     | TP53                                       | 1 | 0 | V\$CREBATF_Q6   | CREB, ATF                         | 5 | 0 |
| V\$CREBP1_01       | cAMP-responsive element binding protein 1 | 8 | 0 | V\$PNR_01       | NR1H2::RXRA                                | 1 | 0 | V\$HEN1_02      | HEN1                              | 5 | 0 |
| V\$HNF4ALPHA_Q6    | HNF4alpha                                 | 8 | 0 | MA0072.1        | Sox2                                       | 1 | 0 | V\$HFH4_01      | HFH4 (FOXJ1)                      | 5 | 0 |
| V\$HNF6_Q6         | HNF6                                      | 8 | 0 | V\$FOXO3_01     | Zfx                                        | 1 | 0 | V\$MRF2_01      | modulator recognition factor 2    | 5 | 0 |
| V\$OCT_C           | Octamer binding site                      | 8 | 0 | V\$HNF3A_01     | FOXA1                                      | 1 | 0 | V\$POU3F2_02    | POU3F2                            | 5 | 0 |
| V\$TAL1BETAITF2_01 | Tal-1beta:ITF-2 heterodimer               | 8 | 0 | V\$HOXD10_01    | HIF1A::ARNT                                | 1 | 0 | V\$PPARG_Q6     | half-site                         | 5 | 0 |
| MA0006.1           | Arnt::Ahr                                 | 7 | 0 | V\$CDPCR1_01    | aryl hydrocarbon / dioxin receptor         | 1 | 0 | V\$SMAD4_Q6     | SMAD4                             | 5 | 0 |
| MA0105.1           | NFKB1                                     | 7 | 0 | MA0025.1        | activating transcription factor 6          | 1 | 0 | V\$SMAD_Q6      | SMAD                              | 5 | 0 |
| V\$HFH4_01         | HFH4 (FOXJ1)                              | 7 | 0 | MA0106.1        | BRCA1 containing protein complex with USF2 | 1 | 0 | V\$TCF11MCFG_01 | TCF11:MafG heterodimers           | 5 | 0 |
| V\$NFKAPPA_B50_01  | NF-kappaB (p50)                           | 7 | 0 | MA0115.1        | CHX10                                      | 1 | 0 | MA0006.1        | Arnt::Ahr                         | 4 | 0 |
| V\$TFEB_01         | TFEB                                      | 7 | 0 | MA0143.1        | c-Myb                                      | 1 | 0 | MA0014.1        | Pax5                              | 4 | 0 |
| MA0031.1           | FOXD1                                     | 6 | 0 | MA0146.1        | Rb:E2F-1:DP-1 trimeric complex             | 1 | 0 | F\$AMT1_Q2      | AMT1                              | 4 | 0 |
| MA0076.1           | ELK4                                      | 6 | 0 | MA0148.1        | E2F-1:DP-2 heterodimer                     | 1 | 0 | V\$ATF3_Q6      | activating transcription factor 3 | 4 | 0 |
| V\$ATF1_Q6         | ATF1                                      | 6 | 0 | MA0259.1        | E2F-4:DP-1 heterodimer                     | 1 | 0 | V\$ERR2_01      | ERR2 (ESRRB)                      | 4 | 0 |
| V\$GRE_C           | Glucocorticoid response element           | 6 | 0 | V\$AHR_Q5       | E2F-4:DP-2 heterodimer                     | 1 | 0 | V\$GATA3_03     | GATA-binding factor 3             | 4 | 0 |
| V\$HSF2_03         | HSF2                                      | 6 | 0 | V\$ATF6_01      | E2F                                        | 1 | 0 | V\$GFI1B_01     | Gfi1b                             | 4 | 0 |
| V\$MYC_Q2          | Myc                                       | 6 | 0 | V\$BRCA_01      | E4BP4                                      | 1 | 0 | V\$HAND1E47_01  | Hand1:E47 heterodimer             | 4 | 0 |
| V\$MYCMAX_01       | c-Myc:Max heterodimer                     | 6 | 0 | V\$CHX10_01     | estrogen-related receptor alpha            | 1 | 0 | V\$IK1_01       | Ikaros 1                          | 4 | 0 |
| V\$RORBETA_Q2      | RORBETA                                   | 6 | 0 | V\$CMYB_01      | fetal Alz-50 clone 1                       | 1 | 0 | V\$MECP2_02     | MECP2 b.s.                        | 4 | 0 |
| V\$SF1_Q6_01       | SF1                                       | 6 | 0 | V\$E2F1DP1RB_01 | GCNF (germ cell nuclear factor)            | 1 | 0 | V\$NRF1_Q6      | nuclear respiratory factor 1      | 4 | 0 |

|                         |                                             |   |   |                  |                                              |   |   |                        |                                                        |   |   |
|-------------------------|---------------------------------------------|---|---|------------------|----------------------------------------------|---|---|------------------------|--------------------------------------------------------|---|---|
| V\$TAL1BET<br>AE47_01   | Tal-1beta:E47 heterodimer                   | 6 | 0 | V\$E2F1DP2_01    | GKLF (KLF4)                                  | 1 | 0 | V\$NUR77_Q5            | NUR77                                                  | 4 | 0 |
| MA0018.2                | CREB1                                       | 5 | 0 | V\$E2F4DP1_01    | GLI                                          | 1 | 0 | V\$REX1_03             | REX1                                                   | 4 | 0 |
| MA0059.1                | MYC::MAX                                    | 5 | 0 | V\$E2F4DP2_01    | HNF4alpha                                    | 1 | 0 | V\$SRF_Q5_02           | SRF                                                    | 4 | 0 |
| MA0130.1                | ZNF354C                                     | 5 | 0 | V\$E2F_02        | HTF                                          | 1 | 0 | V\$TAL1BET<br>AE47_01  | Tal-1beta:E47 heterodimer                              | 4 | 0 |
| MA0141.1                | Esrrb                                       | 5 | 0 | V\$E4BP4_01      | MECP2 b.s.                                   | 1 | 0 | V\$TAL1BET<br>AITF2_01 | Tal-1beta:ITF-2 heterodimer                            | 4 | 0 |
| MA0164.1                | Nr2e3                                       | 5 | 0 | V\$ERR1_Q2       | NF-muE1                                      | 1 | 0 | V\$VBP_01              | PAR-type chicken vitellogenin promoter-binding protein | 4 | 0 |
| V\$ATF_B                | ATF binding site                            | 5 | 0 | V\$FAC1_01       | nerve growth factor-induced protein C        | 1 | 0 | V\$YY1_01              | Yin and Yang 1                                         | 4 | 0 |
| V\$CMYC_02              | c-Myc heterodimer (with a 26-29 kDa factor) | 5 | 0 | V\$GCNF_01       | Pax-1 binding sites                          | 1 | 0 | MA0017.1               | NR2F1                                                  | 3 | 0 |
| V\$CREBATF_Q6           | CREB, ATF                                   | 5 | 0 | V\$GKLF_02       | rat Olf-1/EBF-associated zinc finger protein | 1 | 0 | MA0027.1               | En1                                                    | 3 | 0 |
| V\$EFC_Q6               | RFX1 (EF-C)                                 | 5 | 0 | V\$GLI_Q2        | RORBETA                                      | 1 | 0 | MA0035.2               | Gata1                                                  | 3 | 0 |
| V\$LBP9_01              | LBP9 (Tcfcp211)                             | 5 | 0 | V\$HNF4ALPHA_Q6  | RXRG dimer                                   | 1 | 0 | MA0104.2               | Mycn                                                   | 3 | 0 |
| V\$MAX_01               | Max                                         | 5 | 0 | V\$HTF_01        | RXR:LXR-beta                                 | 1 | 0 | MA0117.1               | Mafb                                                   | 3 | 0 |
| V\$MIF1_01              | MIBP-1 / RFX1 complex                       | 5 | 0 | V\$MECP2_01      | SAP-1a                                       | 1 | 0 | MA0155.1               | INSM1                                                  | 3 | 0 |
| V\$PLZF_02              | PLZF                                        | 5 | 0 | V\$NFMUE1_Q6     | SEF1 binding site                            | 1 | 0 | MA0164.1               | Nr2e3                                                  | 3 | 0 |
| V\$RFX_Q6               | RFX                                         | 5 | 0 | V\$NGFIC_01      | STAT3:STAT3                                  | 1 | 0 | V\$ATF1_Q6             | ATF1                                                   | 3 | 0 |
| V\$TATA_C               | Retroviral TATA box                         | 5 | 0 | V\$PAX1_B        | Stra13                                       | 1 | 0 | V\$CHX10_01            | CHX10                                                  | 3 | 0 |
| V\$TFIIA_Q6             | TFIIA                                       | 5 | 0 | V\$ROAZ_01       | Tal-1beta:E47 heterodimer                    | 1 | 0 | V\$COUP_01             | COUP-TF, HNF-4                                         | 3 | 0 |
| MA0069.1                | Pax6                                        | 4 | 0 | V\$RORBETA_Q2    | T-box 15                                     | 1 | 0 | V\$DR3_Q4              | direct repeat 3                                        | 3 | 0 |
| MA0104.2                | Mycn                                        | 4 | 0 | V\$RXRG_01       | T-box 18                                     | 1 | 0 | V\$LEF1_Q2_01          | LEF1                                                   | 3 | 0 |
| V\$DMRT4_01             | DMRT4                                       | 4 | 0 | V\$RXRLXRB_01    | TBX5                                         | 1 | 0 | V\$LEF1TCF1_Q4         | LEF1, TCF1                                             | 3 | 0 |
| V\$FOXP1_01             | FOXP1                                       | 4 | 0 | V\$SAP1A_01      | TFEB                                         | 1 | 0 | V\$MTERF_01            | mTERF binding site                                     | 3 | 0 |
| V\$HELIOSA_Q2           | Helios A                                    | 4 | 0 | V\$SEF1_C        | X-box-binding protein 1                      | 1 | 0 | V\$PEBP_Q6             | PEBP                                                   | 3 | 0 |
| V\$HP1SITEF<br>ACTOR_Q6 | HP1 site factor                             | 4 | 0 | V\$STAT3STAT3_Q3 | ZBRK1                                        | 1 | 0 | V\$RFX1_02             | X-box binding protein RFX1                             | 3 | 0 |
| V\$IRF8_Q6              | IRF8                                        | 4 | 0 | V\$STRA13_01     | ZF5                                          | 1 | 0 | V\$SAP1A_01            | SAP-1a                                                 | 3 | 0 |



|                    |                                                  |   |   |                       |                    |   |   |                                 |                                                  |   |   |
|--------------------|--------------------------------------------------|---|---|-----------------------|--------------------|---|---|---------------------------------|--------------------------------------------------|---|---|
| V\$POU1F1_Q6       | POU1F1                                           | 4 | 0 | V\$TAL1BET<br>AE47_01 | Glis binding sites | 1 | 0 | V\$STAF_01                      | Se-Cys tRNA gene transcription activating factor | 3 | 0 |
| V\$RXRG_01         | RXRG dimer                                       | 4 | 0 |                       |                    |   |   | V\$STRA13_01                    | Stra13                                           | 3 | 0 |
| V\$RXRLXRB_01      | RXR:LXR-beta                                     | 4 | 0 |                       |                    |   |   | V\$XBP1_02                      | XBP1                                             | 3 | 0 |
| V\$HIF1_Q3         | hypoxia induced factor                           | 2 | 0 |                       |                    |   |   | V\$ZABC1_01                     | ZABC1 b.s.                                       | 3 | 0 |
| V\$HTF_01          | HTF                                              | 2 | 0 |                       |                    |   |   | V\$ZNF219_01                    | ZNF219                                           | 3 | 0 |
| V\$MECP2_01        | MECP2 b.s.                                       | 2 | 0 |                       |                    |   |   | V\$HMGA2_01                     | HMGA2 binding site                               | 3 | 0 |
| V\$MEIS1AH_OXA9_01 | Meis-1a:HOXA9 heterodimeric binding              | 2 | 0 |                       |                    |   |   | MA0009.1                        | T                                                | 2 | 0 |
| V\$NGFIC_01        | nerve growth factor-induced protein C            | 2 | 0 |                       |                    |   |   | MA0018.2                        | CREB1                                            | 2 | 0 |
| V\$NRF1_Q6         | nuclear respiratory factor 1                     | 2 | 0 |                       |                    |   |   | MA0069.1                        | Pax6                                             | 2 | 0 |
| V\$PAX3_B          | Pax-3 binding sites                              | 2 | 0 |                       |                    |   |   | MA0092.1                        | Hand1::Tcfe2a                                    | 2 | 0 |
| V\$POU3F2_01       | POU3F2                                           | 2 | 0 |                       |                    |   |   | MA0093.1                        | USF1                                             | 2 | 0 |
| V\$RORA1_01        | RAR-related orphan receptor alpha1               | 2 | 0 |                       |                    |   |   | MA0105.1                        | NFKB1                                            | 2 | 0 |
| V\$SP2_01          | SP2                                              | 2 | 0 |                       |                    |   |   | MA0133.1                        | BRCA1                                            | 2 | 0 |
| V\$STAF_01         | Se-Cys tRNA gene transcription activating factor | 2 | 0 |                       |                    |   |   | MA0140.1                        | Tal1::Gata1                                      | 2 | 0 |
| V\$TAXCREB_01      | Tax/CREB complex                                 | 2 | 0 |                       |                    |   |   | MA0442.1                        | SOX10                                            | 2 | 0 |
| V\$TBX15_01        | T-box 15                                         | 2 | 0 |                       |                    |   |   | V\$COREBIN<br>DINGFACTO<br>R_Q6 | core-binding factor                              | 1 | 0 |
| V\$TBX18_01        | T-box 18                                         | 2 | 0 |                       |                    |   |   | V\$COUPTF_Q6                    | COUPTF                                           | 1 | 0 |
| V\$VDRRXR_01       | VDR:RXR                                          | 2 | 0 |                       |                    |   |   | V\$DMRT1_01                     | DMRT1                                            | 1 | 0 |
| V\$XBP1_01         | X-box-binding protein 1                          | 2 | 0 |                       |                    |   |   | V\$GATA2_02                     | GATA-binding factor 2                            | 1 | 0 |
| V\$YY1_02          | Yin and Yang 1                                   | 2 | 0 |                       |                    |   |   | V\$GATA6_01                     | GATA-6                                           | 1 | 0 |
| V\$ZBRK1_01        | ZBRK1                                            | 2 | 0 |                       |                    |   |   | V\$GLI3_01                      | GLI3                                             | 1 | 0 |
| V\$ZNF219_01       | ZNF219                                           | 2 | 0 |                       |                    |   |   | V\$GZF1_01                      | plays a role in renal branching morphogenesis    | 1 | 0 |
| V\$ZNF515_01       | Glis binding sites                               | 2 | 0 |                       |                    |   |   | V\$HBP1_Q2                      | hbp1                                             | 1 | 0 |

|              |                          |   |   |  |  |  |               |                                                |   |   |
|--------------|--------------------------|---|---|--|--|--|---------------|------------------------------------------------|---|---|
| MA0072.1     | RORA_2                   | 1 | 0 |  |  |  | V\$HES1_Q2    | HES1                                           | 1 | 0 |
| MA0091.1     | TAL1::TCF3               | 1 | 0 |  |  |  | V\$HIF1_Q3    | hypoxia induced factor                         | 1 | 0 |
| V\$STRA13_01 | Stra13                   | 1 | 0 |  |  |  | V\$HIF2A_01   | HIF-2alpha                                     | 1 | 0 |
| V\$WHN_B     | winged-helix factor nude | 1 | 0 |  |  |  | V\$IK3_01     | Ikaros 3                                       | 1 | 0 |
|              |                          |   |   |  |  |  | V\$LBP9_01    | LBP9 (Tcfcp211)                                | 1 | 0 |
|              |                          |   |   |  |  |  | V\$LXR_Q3     | LXR                                            | 1 | 0 |
|              |                          |   |   |  |  |  | V\$MIF1_01    | MIBP-1 / RFX1 complex                          | 1 | 0 |
|              |                          |   |   |  |  |  | V\$MYB_Q3     | MYB                                            | 1 | 0 |
|              |                          |   |   |  |  |  | V\$MYC_Q2     | Myc                                            | 1 | 0 |
|              |                          |   |   |  |  |  | V\$MYOGNF1_01 | myogenin / nuclear factor 1 or related factors | 1 | 0 |
|              |                          |   |   |  |  |  | V\$NGFIC_01   | nerve growth factor-induced protein C          | 1 | 0 |
|              |                          |   |   |  |  |  | V\$P300_01    | p300                                           | 1 | 0 |
|              |                          |   |   |  |  |  | V\$PAX3_B     | Pax-3 binding sites                            | 1 | 0 |
|              |                          |   |   |  |  |  | V\$PNR_01     | PNR                                            | 1 | 0 |
|              |                          |   |   |  |  |  | V\$PPARA_01   | PPAR:RXR heterodimers                          | 1 | 0 |
|              |                          |   |   |  |  |  | V\$RFX_Q6     | RFX                                            | 1 | 0 |
|              |                          |   |   |  |  |  | V\$TAXCREB_01 | Tax/CREB complex                               | 1 | 0 |
|              |                          |   |   |  |  |  | V\$TBX15_01   | T-box 15                                       | 1 | 0 |
|              |                          |   |   |  |  |  | V\$TBX22_01   | TBX22                                          | 1 | 0 |
|              |                          |   |   |  |  |  | V\$ZF5_B      | ZF5 binding sites                              | 1 | 0 |

**Supplementary Table VI.** List of genes differentially expressed by at least 1.5-fold (FPKM  $\geq 1.5$ ) in siRNA mediated PAX2-knockdown versus control REP cells.

| Gene Identifier | Gene Name | FPKM          |            |                    |             | p_value |
|-----------------|-----------|---------------|------------|--------------------|-------------|---------|
|                 |           | Control siRNA | PAX2 siRNA | log2 (fold change) | Fold Change |         |
| NM_000076       | CDKN1C    | 188.2         | 8.6        | -4.5               | 21.9        | 5.0E-05 |
| NM_001166034    | SBSN      | 6.5           | 0.3        | -4.4               | 21.8        | 5.0E-05 |
| NM_001256324    | CACNA1G   | 1.6           | 0.1        | -4.3               | 19.5        | 5.0E-05 |
| NM_001184699    | CPXM1     | 4.8           | 0.3        | -4.1               | 17.1        | 5.0E-05 |
| NM_024697       | ZNF385D   | 1.6           | 0.1        | -3.9               | 15.4        | 5.0E-05 |
| NM_004994       | MMP9      | 1.7           | 0.1        | -3.9               | 14.6        | 5.0E-05 |
| NM_002522       | NPTX1     | 30.0          | 2.1        | -3.8               | 14.3        | 5.0E-05 |
| NM_001335       | CTSW      | 1.7           | 0.1        | -3.7               | 13.3        | 1.4E-02 |
| NM_001142617    | STRA6     | 3.2           | 0.2        | -3.7               | 13.1        | 5.0E-05 |
| NM_002274       | KRT13     | 1.9           | 0.1        | -3.7               | 12.8        | 5.0E-05 |
| NM_005794       | DHRS2     | 24.3          | 1.9        | -3.7               | 12.6        | 5.0E-05 |
| NM_001703       | BAI2      | 10.6          | 0.9        | -3.5               | 11.6        | 5.0E-05 |
| NM_001165967    | HES7      | 1.5           | 0.1        | -3.5               | 10.9        | 5.0E-05 |
| NM_005554       | KRT6A     | 5.2           | 0.5        | -3.4               | 10.5        | 5.0E-05 |
| NM_014353       | RAB26     | 6.4           | 0.6        | -3.3               | 10.0        | 5.0E-05 |
| NM_001242757    | SLC22A31  | 1.5           | 0.1        | -3.3               | 9.8         | 5.0E-05 |
| NM_207373       | C10orf99  | 3.2           | 0.4        | -3.2               | 9.1         | 5.0E-05 |
| NM_000526       | KRT14     | 4.8           | 0.5        | -3.2               | 9.1         | 5.0E-05 |
| NM_018159       | NUDT11    | 3.1           | 0.3        | -3.2               | 9.0         | 5.0E-05 |
| NM_173798       | ZCCHC12   | 1.9           | 0.2        | -3.1               | 8.8         | 5.0E-05 |
| NM_005557       | KRT16     | 3.5           | 0.4        | -3.1               | 8.7         | 5.0E-05 |
| NM_003125       | SPRR1B    | 1.7           | 0.2        | -3.1               | 8.3         | 5.0E-05 |
| NM_000424       | KRT5      | 9.8           | 1.2        | -3.0               | 8.2         | 5.0E-05 |
| NM_001048       | SST       | 121.5         | 14.9       | -3.0               | 8.1         | 5.0E-05 |
| NM_004932       | CDH6      | 6.5           | 0.9        | -2.9               | 7.5         | 5.0E-05 |
| NM_003004       | SECTM1    | 6.2           | 0.9        | -2.8               | 7.2         | 5.0E-05 |
| NM_002965       | S100A9    | 4.4           | 0.6        | -2.8               | 7.2         | 5.0E-05 |
| NM_020125       | SLAMF8    | 11.0          | 1.5        | -2.8               | 7.1         | 5.0E-05 |
| NM_001001991    | PAMR1     | 2.6           | 0.4        | -2.8               | 7.0         | 5.0E-05 |
| NM_001013838    | RLTPR     | 4.0           | 0.6        | -2.8               | 6.9         | 5.0E-05 |
| NM_001168368    | GALNT16   | 3.0           | 0.4        | -2.8               | 6.8         | 5.0E-05 |
| NM_001142853    | HES6      | 7.8           | 1.2        | -2.7               | 6.6         | 5.0E-05 |
| NM_001171092    | CLDN2     | 8.2           | 1.3        | -2.7               | 6.5         | 5.0E-05 |
| NM_004522       | KIF5C     | 1.5           | 0.2        | -2.7               | 6.5         | 5.0E-05 |
| NM_173633       | TMEM145   | 2.0           | 0.3        | -2.7               | 6.4         | 5.0E-05 |
| NM_016564       | CEND1     | 2.6           | 0.4        | -2.7               | 6.3         | 5.0E-05 |
| NM_001523       | HAS1      | 91.6          | 14.5       | -2.7               | 6.3         | 5.0E-05 |
| NM_001199989    | RASD1     | 15.3          | 2.5        | -2.6               | 6.2         | 5.0E-05 |
| NM_005029       | PITX3     | 3.6           | 0.6        | -2.6               | 6.1         | 5.0E-05 |
| NM_000839       | GRM2      | 1.6           | 0.3        | -2.6               | 6.0         | 5.0E-05 |
| NM_003641       | IFITM1    | 93.1          | 16.1       | -2.5               | 5.8         | 5.0E-05 |
| NM_052924       | RHPN1     | 3.4           | 0.6        | -2.5               | 5.8         | 5.0E-05 |
| NM_001136528    | SERPINE2  | 13.9          | 2.4        | -2.5               | 5.7         | 5.0E-05 |
| NM_001008272    | TAGLN3    | 3.0           | 0.5        | -2.5               | 5.7         | 5.0E-05 |
| NM_031297       | RNF208    | 3.0           | 0.5        | -2.5               | 5.6         | 5.0E-05 |
| NM_145004       | ADAM32    | 2.6           | 0.5        | -2.5               | 5.6         | 5.0E-05 |
| NM_152864       | NKAIN4    | 9.0           | 1.6        | -2.5               | 5.6         | 5.0E-05 |
| NM_005213       | CSTA      | 1.5           | 0.3        | -2.5               | 5.5         | 5.0E-05 |
| NM_001238       | CCNE1     | 12.9          | 2.3        | -2.5               | 5.5         | 5.0E-05 |
| NM_001080997    | RTBDN     | 1.6           | 0.3        | -2.4               | 5.4         | 5.0E-05 |
| NM_002248       | KCNN1     | 2.0           | 0.4        | -2.4               | 5.4         | 5.0E-05 |
| NM_001079870    | HAP1      | 2.0           | 0.4        | -2.4               | 5.4         | 5.0E-05 |
| NM_001159936    | EBNA1BP2  | 73.3          | 13.7       | -2.4               | 5.3         | 5.0E-05 |
| NM_016215       | EGFL7     | 22.9          | 4.3        | -2.4               | 5.3         | 5.0E-05 |

|              |            |       |      |      |     |         |
|--------------|------------|-------|------|------|-----|---------|
| NM_033259    | CAMK2N2    | 5.3   | 1.0  | -2.4 | 5.3 | 5.0E-05 |
| NM_001287435 | CEBPA      | 1.5   | 0.3  | -2.4 | 5.2 | 5.0E-05 |
| NM_016354    | SLCO4A1    | 2.1   | 0.4  | -2.4 | 5.2 | 5.0E-05 |
| NM_001042437 | ST3GAL5    | 11.0  | 2.1  | -2.4 | 5.2 | 5.0E-05 |
| NM_001256213 | ATP1A3     | 2.2   | 0.4  | -2.4 | 5.2 | 5.0E-05 |
| NM_001012302 | ANO9       | 2.7   | 0.5  | -2.4 | 5.1 | 5.0E-05 |
| NM_002163    | IRF8       | 4.2   | 0.8  | -2.4 | 5.1 | 5.0E-05 |
| NM_000784    | CYP27A1    | 7.5   | 1.5  | -2.3 | 5.0 | 5.0E-05 |
| NM_002964    | S100A8     | 2.2   | 0.4  | -2.3 | 5.0 | 5.0E-05 |
| NM_000597    | IGFBP2     | 10.4  | 2.1  | -2.3 | 5.0 | 5.0E-05 |
| NM_001025158 | CD74       | 108.0 | 21.8 | -2.3 | 4.9 | 5.0E-05 |
| NM_001270965 | PSD        | 4.2   | 0.9  | -2.3 | 4.9 | 5.0E-05 |
| NM_003378    | VGf        | 5.0   | 1.0  | -2.3 | 4.9 | 5.0E-05 |
| NM_001463    | FRZB       | 2.3   | 0.5  | -2.3 | 4.8 | 5.0E-05 |
| NM_198573    | ENHO       | 6.2   | 1.3  | -2.3 | 4.8 | 5.0E-05 |
| NM_001135057 | LRRC15     | 2.7   | 0.6  | -2.3 | 4.8 | 5.0E-05 |
| NM_020672    | S100A14    | 1.9   | 0.4  | -2.3 | 4.8 | 5.0E-05 |
| NM_012435    | SHC2       | 1.7   | 0.3  | -2.3 | 4.8 | 5.0E-05 |
| NM_012412    | H2AFV      | 130.4 | 27.4 | -2.2 | 4.7 | 5.0E-05 |
| NM_004209    | SYNGR3     | 2.4   | 0.5  | -2.2 | 4.7 | 5.0E-05 |
| NM_002996    | CX3CL1     | 6.4   | 1.4  | -2.2 | 4.7 | 5.0E-05 |
| NM_006818    | MLLT11     | 13.8  | 2.9  | -2.2 | 4.7 | 5.0E-05 |
| NM_004054    | C3AR1      | 1.7   | 0.4  | -2.2 | 4.7 | 5.0E-05 |
| NR_026936    | C5orf27    | 1.7   | 0.4  | -2.2 | 4.6 | 5.0E-05 |
| NR_027284    | LINC00602  | 2.1   | 0.5  | -2.2 | 4.6 | 5.0E-05 |
| NM_004378    | CRABP1     | 2.4   | 0.5  | -2.2 | 4.6 | 5.0E-05 |
| NM_015474    | SAMHD1     | 16.2  | 3.6  | -2.2 | 4.5 | 5.0E-05 |
| NM_015964    | TPPP3      | 2.0   | 0.4  | -2.2 | 4.5 | 5.0E-05 |
| NM_016044    | FAHD2A     | 23.3  | 5.2  | -2.2 | 4.5 | 5.0E-05 |
| NM_019112    | ABCA7      | 4.6   | 1.0  | -2.2 | 4.5 | 5.0E-05 |
| NM_000278    | PAX2       | 3.4   | 0.8  | -2.2 | 4.5 | 5.0E-05 |
| NM_001039614 | C15orf59   | 1.7   | 0.4  | -2.2 | 4.4 | 5.0E-05 |
| NM_004878    | PTGES      | 39.8  | 9.0  | -2.1 | 4.4 | 5.0E-05 |
| NM_206833    | CTXN1      | 15.1  | 3.4  | -2.1 | 4.4 | 5.0E-05 |
| NM_000505    | F12        | 6.3   | 1.4  | -2.1 | 4.4 | 5.0E-05 |
| NR_036494    | LOC643201  | 3.8   | 0.9  | -2.1 | 4.4 | 5.0E-05 |
| NM_000609    | CXCL12     | 2.2   | 0.5  | -2.1 | 4.4 | 5.0E-05 |
| NR_038237    | RAB11B-AS1 | 3.7   | 0.9  | -2.1 | 4.3 | 5.0E-05 |
| NM_007193    | ANXA10     | 2.6   | 0.6  | -2.1 | 4.3 | 5.0E-05 |
| NM_001080779 | MYO1C      | 57.9  | 13.6 | -2.1 | 4.3 | 5.0E-05 |
| NM_001135731 | ZMAT4      | 2.0   | 0.5  | -2.1 | 4.3 | 5.0E-05 |
| NM_033452    | TRIM47     | 16.7  | 3.9  | -2.1 | 4.2 | 5.0E-05 |
| NM_018689    | KIAA1199   | 4.3   | 1.0  | -2.1 | 4.2 | 5.0E-05 |
| NR_026860    | LINC00473  | 8.4   | 2.0  | -2.1 | 4.2 | 5.0E-05 |
| NM_145056    | DACT3      | 2.4   | 0.6  | -2.1 | 4.2 | 1.2E-02 |
| NM_000221    | KHK        | 2.0   | 0.5  | -2.1 | 4.2 | 5.0E-05 |
| NM_005167    | PPM1J      | 2.4   | 0.6  | -2.1 | 4.2 | 5.0E-05 |
| NM_014975    | MAST1      | 2.1   | 0.5  | -2.1 | 4.2 | 5.0E-05 |
| NM_001164586 | IGFN1      | 40.0  | 9.6  | -2.1 | 4.2 | 5.0E-05 |
| NM_001190945 | TRAF1      | 4.2   | 1.0  | -2.1 | 4.2 | 5.0E-05 |
| NM_001243965 | HLA-DRB1   | 3.2   | 0.8  | -2.1 | 4.1 | 5.0E-05 |
| NM_001286606 | EFCAB4A    | 2.7   | 0.6  | -2.0 | 4.1 | 5.0E-05 |
| NM_006039    | MRC2       | 115.8 | 28.1 | -2.0 | 4.1 | 5.0E-05 |
| NM_001267036 | SLC7A8     | 2.9   | 0.7  | -2.0 | 4.1 | 5.0E-05 |
| NM_001284260 | WDR86      | 5.1   | 1.2  | -2.0 | 4.1 | 5.0E-05 |
| NM_001037281 | PAR6A      | 2.1   | 0.5  | -2.0 | 4.1 | 5.0E-05 |
| NM_001276310 | STMN3      | 28.3  | 6.9  | -2.0 | 4.1 | 5.0E-05 |
| NM_001136493 | MFSD2A     | 13.0  | 3.2  | -2.0 | 4.1 | 5.0E-05 |
| NM_001014447 | CPZ        | 2.1   | 0.5  | -2.0 | 4.1 | 5.0E-05 |
| NM_015077    | SARM1      | 2.1   | 0.5  | -2.0 | 4.0 | 5.0E-05 |
| NR_026991    | H1FX-AS1   | 1.6   | 0.4  | -2.0 | 4.0 | 3.0E-04 |

|              |            |      |      |      |     |         |
|--------------|------------|------|------|------|-----|---------|
| NM_001207035 | ETV7       | 2.4  | 0.6  | -2.0 | 4.0 | 5.0E-05 |
| NM_001271285 | FAM173A    | 52.6 | 13.2 | -2.0 | 4.0 | 5.0E-05 |
| NM_001282447 | ADAM33     | 1.6  | 0.4  | -2.0 | 4.0 | 5.0E-05 |
| NM_004759    | MAPKAPK2   | 38.7 | 9.9  | -2.0 | 3.9 | 5.0E-05 |
| NM_001823    | CKB        | 98.3 | 25.0 | -2.0 | 3.9 | 5.0E-05 |
| NM_173587    | RCOR2      | 2.1  | 0.5  | -2.0 | 3.9 | 5.0E-05 |
| NM_138328    | RHBDL3     | 2.4  | 0.6  | -2.0 | 3.9 | 5.0E-05 |
| NM_001002837 | INPP5J     | 3.9  | 1.0  | -2.0 | 3.9 | 5.0E-05 |
| NM_001025109 | CD34       | 2.0  | 0.5  | -2.0 | 3.9 | 5.0E-05 |
| NM_020378    | NAT14      | 42.7 | 11.0 | -1.9 | 3.9 | 5.0E-05 |
| NM_001272104 | PAQR6      | 2.7  | 0.7  | -1.9 | 3.9 | 5.0E-05 |
| NM_001218    | CA12       | 6.9  | 1.8  | -1.9 | 3.8 | 5.0E-05 |
| NM_003459    | SLC30A3    | 1.6  | 0.4  | -1.9 | 3.8 | 5.0E-05 |
| NM_001261825 | OASL       | 15.9 | 4.2  | -1.9 | 3.8 | 5.0E-05 |
| NM_001244889 | UNC5B      | 5.5  | 1.4  | -1.9 | 3.8 | 5.0E-05 |
| NM_001193333 | CORO1A     | 9.1  | 2.4  | -1.9 | 3.8 | 5.0E-05 |
| NM_001127198 | TMC6       | 1.5  | 0.4  | -1.9 | 3.8 | 5.0E-05 |
| NM_005173    | ATP2A3     | 3.3  | 0.9  | -1.9 | 3.8 | 5.0E-05 |
| NM_005440    | RND2       | 1.9  | 0.5  | -1.9 | 3.7 | 5.0E-05 |
| NR_026934    | LOC152225  | 1.9  | 0.5  | -1.9 | 3.7 | 5.0E-05 |
| NM_001177428 | TRPV4      | 4.0  | 1.1  | -1.9 | 3.7 | 5.0E-05 |
| NM_003469    | SCG2       | 1.6  | 0.4  | -1.9 | 3.6 | 5.0E-05 |
| NM_133639    | RHOV       | 1.5  | 0.4  | -1.9 | 3.6 | 5.0E-05 |
| NM_001005209 | TMEM198    | 4.2  | 1.2  | -1.9 | 3.6 | 5.0E-05 |
| NM_145175    | FAM84A     | 1.9  | 0.5  | -1.9 | 3.6 | 5.0E-05 |
| NM_014310    | RASD2      | 18.8 | 5.2  | -1.8 | 3.6 | 5.0E-05 |
| NM_006426    | DPYSL4     | 3.4  | 0.9  | -1.8 | 3.6 | 5.0E-05 |
| NM_025268    | TMEM121    | 8.2  | 2.3  | -1.8 | 3.6 | 5.0E-05 |
| NM_001128325 | SPON2      | 6.0  | 1.7  | -1.8 | 3.6 | 5.0E-05 |
| NM_001171992 | C6orf223   | 2.9  | 0.8  | -1.8 | 3.6 | 5.0E-05 |
| NR_026656    | LOC400043  | 9.8  | 2.8  | -1.8 | 3.6 | 5.0E-05 |
| NM_001282582 | MXRA8      | 23.1 | 6.5  | -1.8 | 3.6 | 5.0E-05 |
| NM_001031738 | TMEM150A   | 6.5  | 1.8  | -1.8 | 3.5 | 5.0E-05 |
| NM_004195    | TNFRSF18   | 1.9  | 0.5  | -1.8 | 3.5 | 5.0E-05 |
| NM_005946    | MT1A       | 11.2 | 3.2  | -1.8 | 3.4 | 5.0E-05 |
| NM_001095    | ASIC1      | 6.9  | 2.0  | -1.8 | 3.4 | 5.0E-05 |
| NM_001130046 | CCL20      | 17.2 | 5.0  | -1.8 | 3.4 | 5.0E-05 |
| NM_000638    | VTN        | 5.7  | 1.7  | -1.8 | 3.4 | 5.0E-05 |
| NM_002390    | ADAM11     | 1.6  | 0.5  | -1.8 | 3.4 | 5.0E-05 |
| NM_001253357 | TIE1       | 1.9  | 0.6  | -1.8 | 3.4 | 5.0E-05 |
| NM_001395    | DUSP9      | 1.7  | 0.5  | -1.8 | 3.4 | 5.0E-05 |
| NM_001031739 | ASB9       | 2.9  | 0.9  | -1.8 | 3.4 | 5.0E-05 |
| NM_001146029 | SEMA7A     | 29.7 | 8.7  | -1.8 | 3.4 | 5.0E-05 |
| NM_001278719 | SV2A       | 22.1 | 6.5  | -1.8 | 3.4 | 5.0E-05 |
| NM_024112    | C9orf16    | 67.4 | 19.9 | -1.8 | 3.4 | 5.0E-05 |
| NM_001278736 | CCL5       | 7.9  | 2.3  | -1.8 | 3.4 | 5.0E-05 |
| NM_019849    | SLC7A10    | 1.7  | 0.5  | -1.8 | 3.4 | 4.5E-04 |
| NM_005886    | KATNB1     | 12.8 | 3.8  | -1.8 | 3.4 | 5.0E-05 |
| NM_020130    | C8orf4     | 6.1  | 1.8  | -1.8 | 3.4 | 5.0E-05 |
| NM_001130518 | CSGALNACT1 | 22.9 | 6.8  | -1.8 | 3.4 | 5.0E-05 |
| NM_001199723 | CRABP2     | 17.8 | 5.3  | -1.7 | 3.4 | 5.0E-05 |
| NM_001110199 | SRRM3      | 2.2  | 0.7  | -1.7 | 3.4 | 5.0E-05 |
| NM_000345    | SNCA       | 1.5  | 0.4  | -1.7 | 3.3 | 5.0E-05 |
| NM_000478    | ALPL       | 5.7  | 1.7  | -1.7 | 3.3 | 5.0E-05 |
| NM_002118    | HLA-DMB    | 2.7  | 0.8  | -1.7 | 3.3 | 5.0E-05 |
| NM_018425    | PI4K2A     | 21.2 | 6.4  | -1.7 | 3.3 | 5.0E-05 |
| NM_015156    | RCOR1      | 16.8 | 5.1  | -1.7 | 3.3 | 5.0E-05 |
| NM_031302    | GLT8D2     | 3.9  | 1.2  | -1.7 | 3.3 | 5.0E-05 |
| NM_016155    | MMP17      | 2.9  | 0.9  | -1.7 | 3.3 | 5.0E-05 |
| NM_001083588 | E2F5       | 3.5  | 1.1  | -1.7 | 3.3 | 5.0E-05 |
| NM_001033053 | NLRP1      | 15.8 | 4.9  | -1.7 | 3.2 | 5.0E-05 |

|              |              |       |      |      |     |         |
|--------------|--------------|-------|------|------|-----|---------|
| NM_003857    | GALR2        | 1.5   | 0.5  | -1.7 | 3.2 | 5.0E-05 |
| NM_001633    | AMBP         | 6.7   | 2.1  | -1.7 | 3.2 | 5.0E-05 |
| NM_018659    | CYTL1        | 30.4  | 9.4  | -1.7 | 3.2 | 5.0E-05 |
| NM_206827    | RASL11A      | 3.6   | 1.1  | -1.7 | 3.2 | 5.0E-05 |
| NM_014238    | KSR1         | 17.1  | 5.3  | -1.7 | 3.2 | 5.0E-05 |
| NM_152399    | TMEM155      | 2.1   | 0.6  | -1.7 | 3.2 | 5.0E-05 |
| NM_003923    | FOXH1        | 2.2   | 0.7  | -1.7 | 3.2 | 3.6E-03 |
| NM_003280    | TNNC1        | 3.3   | 1.0  | -1.7 | 3.2 | 5.0E-05 |
| NM_001001938 | C9orf47      | 14.1  | 4.4  | -1.7 | 3.2 | 5.0E-05 |
| NM_000637    | GSR          | 56.5  | 17.6 | -1.7 | 3.2 | 5.0E-05 |
| NM_024308    | DHRS11       | 11.5  | 3.6  | -1.7 | 3.2 | 5.0E-05 |
| NM_001039960 | SLC4A8       | 3.4   | 1.1  | -1.7 | 3.2 | 5.0E-05 |
| NR_026844    | ANKRD36BP1   | 10.9  | 3.4  | -1.7 | 3.2 | 5.0E-05 |
| NM_001204961 | PBX1         | 14.2  | 4.5  | -1.7 | 3.2 | 5.0E-05 |
| NM_025045    | BAIAP2L2     | 2.4   | 0.8  | -1.7 | 3.2 | 5.0E-05 |
| NM_000600    | IL6          | 12.5  | 4.0  | -1.7 | 3.2 | 5.0E-05 |
| NM_001066    | TNFRSF1B     | 6.8   | 2.2  | -1.7 | 3.1 | 5.0E-05 |
| NM_001005855 | ATP8B2       | 13.1  | 4.2  | -1.6 | 3.1 | 5.0E-05 |
| NM_001165977 | PROM2        | 1.8   | 0.6  | -1.6 | 3.1 | 5.0E-05 |
| NR_036480    | LOC100128881 | 4.2   | 1.4  | -1.6 | 3.1 | 4.6E-03 |
| NM_001100812 | CXCL16       | 10.1  | 3.2  | -1.6 | 3.1 | 5.0E-05 |
| NM_003179    | SYP          | 1.6   | 0.5  | -1.6 | 3.1 | 5.0E-05 |
| NM_003737    | DCHS1        | 3.1   | 1.0  | -1.6 | 3.1 | 5.0E-05 |
| NM_001130713 | LEF1         | 4.2   | 1.4  | -1.6 | 3.1 | 5.0E-05 |
| NM_015896    | ZMYND10      | 2.1   | 0.7  | -1.6 | 3.1 | 5.0E-05 |
| NM_017560    | ZNF853       | 7.0   | 2.3  | -1.6 | 3.1 | 5.0E-05 |
| NM_022834    | VWA1         | 18.3  | 6.0  | -1.6 | 3.1 | 5.0E-05 |
| NM_001114173 | CTSC         | 31.7  | 10.4 | -1.6 | 3.0 | 5.0E-05 |
| NM_001145106 | FIBCD1       | 4.0   | 1.3  | -1.6 | 3.0 | 5.0E-05 |
| NM_001244014 | PIANP        | 11.0  | 3.6  | -1.6 | 3.0 | 5.0E-05 |
| NM_001216    | CA9          | 18.1  | 6.0  | -1.6 | 3.0 | 5.0E-05 |
| NM_000161    | GCH1         | 10.2  | 3.4  | -1.6 | 3.0 | 5.0E-05 |
| NM_001001795 | C8orf82      | 9.8   | 3.3  | -1.6 | 3.0 | 5.0E-05 |
| NM_001174089 | SLC4A11      | 2.3   | 0.8  | -1.6 | 3.0 | 5.0E-05 |
| NM_145754    | KIFC2        | 11.0  | 3.7  | -1.6 | 3.0 | 5.0E-05 |
| NM_005309    | GPT          | 3.6   | 1.2  | -1.6 | 3.0 | 1.3E-02 |
| NM_004544    | NDUFA10      | 19.7  | 6.5  | -1.6 | 3.0 | 5.0E-05 |
| NM_001165258 | TMEM14C      | 134.3 | 44.6 | -1.6 | 3.0 | 5.0E-05 |
| NM_000162    | GCK          | 1.6   | 0.5  | -1.6 | 3.0 | 5.0E-05 |
| NM_001134771 | SLC12A5      | 6.3   | 2.1  | -1.6 | 3.0 | 5.0E-05 |
| NM_004807    | HS6ST1       | 31.6  | 10.6 | -1.6 | 3.0 | 5.0E-05 |
| NM_006465    | ARID3B       | 3.2   | 1.1  | -1.6 | 3.0 | 5.0E-05 |
| NM_004204    | PIGQ         | 22.4  | 7.5  | -1.6 | 3.0 | 5.0E-05 |
| NM_001098721 | GNG4         | 2.3   | 0.8  | -1.6 | 3.0 | 5.0E-05 |
| NM_001040661 | SLC29A4      | 5.7   | 1.9  | -1.6 | 3.0 | 5.0E-05 |
| NM_001277077 | HOMER1       | 5.5   | 1.9  | -1.6 | 3.0 | 5.0E-05 |
| NM_024430    | PSTPIP2      | 8.4   | 2.9  | -1.6 | 2.9 | 5.0E-05 |
| NM_020959    | ANO8         | 4.9   | 1.7  | -1.6 | 2.9 | 5.0E-05 |
| NM_002463    | MX2          | 3.4   | 1.2  | -1.6 | 2.9 | 5.0E-05 |
| NM_002442    | MSI1         | 6.9   | 2.4  | -1.5 | 2.9 | 5.0E-05 |
| NM_001077693 | ECSCR        | 4.7   | 1.6  | -1.5 | 2.9 | 5.0E-05 |
| NM_001145023 | SCRN2        | 16.9  | 5.8  | -1.5 | 2.9 | 5.0E-05 |
| NM_025015    | HSPA12A      | 6.5   | 2.2  | -1.5 | 2.9 | 5.0E-05 |
| NM_001113205 | TSTD1        | 19.1  | 6.6  | -1.5 | 2.9 | 5.0E-05 |
| NM_001164277 | SLC37A4      | 20.7  | 7.1  | -1.5 | 2.9 | 5.0E-05 |
| NM_001171940 | FNDC5        | 2.8   | 1.0  | -1.5 | 2.9 | 5.0E-05 |
| NM_005631    | SMO          | 15.8  | 5.4  | -1.5 | 2.9 | 5.0E-05 |
| NM_000690    | ALDH2        | 39.6  | 13.6 | -1.5 | 2.9 | 5.0E-05 |
| NM_001286680 | NPM2         | 4.4   | 1.5  | -1.5 | 2.9 | 5.0E-05 |
| NM_001197294 | DPYSL3       | 66.1  | 22.8 | -1.5 | 2.9 | 5.0E-05 |
| NM_001257359 | SAMD14       | 2.7   | 0.9  | -1.5 | 2.9 | 5.0E-05 |

|              |          |       |      |      |     |         |
|--------------|----------|-------|------|------|-----|---------|
| NM_000376    | VDR      | 3.9   | 1.4  | -1.5 | 2.9 | 5.0E-05 |
| NM_001252100 | KIF21B   | 2.4   | 0.8  | -1.5 | 2.9 | 5.0E-05 |
| NM_001561    | TNFRSF9  | 2.8   | 1.0  | -1.5 | 2.9 | 5.0E-05 |
| NM_001008949 | ITPRIPL1 | 2.9   | 1.0  | -1.5 | 2.9 | 5.0E-05 |
| NM_032413    | C15orf48 | 4.2   | 1.5  | -1.5 | 2.9 | 5.0E-05 |
| NM_001142467 | HES4     | 21.4  | 7.4  | -1.5 | 2.9 | 5.0E-05 |
| NM_005456    | MAPK8IP1 | 4.1   | 1.4  | -1.5 | 2.9 | 5.0E-05 |
| NM_012109    | TMEM59L  | 12.3  | 4.3  | -1.5 | 2.9 | 5.0E-05 |
| NM_033102    | SLC45A3  | 3.7   | 1.3  | -1.5 | 2.9 | 5.0E-05 |
| NM_001100592 | ATP6V0E2 | 20.4  | 7.2  | -1.5 | 2.9 | 5.0E-05 |
| NM_004952    | EFNA3    | 2.3   | 0.8  | -1.5 | 2.8 | 5.0E-05 |
| NM_001144996 | ITGA7    | 11.5  | 4.0  | -1.5 | 2.8 | 5.0E-05 |
| NM_001195528 | TPBGL    | 2.6   | 0.9  | -1.5 | 2.8 | 5.0E-05 |
| NM_173462    | PAPLN    | 11.1  | 3.9  | -1.5 | 2.8 | 5.0E-05 |
| NR_003142    | SNHG9    | 28.4  | 10.0 | -1.5 | 2.8 | 5.0E-05 |
| NM_001205329 | JAM3     | 9.1   | 3.2  | -1.5 | 2.8 | 5.0E-05 |
| NM_001172623 | NEO1     | 7.9   | 2.8  | -1.5 | 2.8 | 5.0E-05 |
| NM_015392    | NPDC1    | 18.0  | 6.4  | -1.5 | 2.8 | 5.0E-05 |
| NM_021570    | BARX1    | 15.5  | 5.5  | -1.5 | 2.8 | 5.0E-05 |
| NM_003259    | ICAM5    | 2.2   | 0.8  | -1.5 | 2.8 | 5.0E-05 |
| NM_138393    | REEP6    | 13.4  | 4.8  | -1.5 | 2.8 | 5.0E-05 |
| NM_024052    | GID4     | 4.6   | 1.6  | -1.5 | 2.8 | 5.0E-05 |
| NM_002023    | FMOD     | 4.3   | 1.5  | -1.5 | 2.8 | 5.0E-05 |
| NM_001256566 | F2RL2    | 2.0   | 0.7  | -1.5 | 2.8 | 5.0E-05 |
| NM_001127711 | TMEM14B  | 144.4 | 52.0 | -1.5 | 2.8 | 5.0E-05 |
| NM_006059    | LAMC3    | 2.2   | 0.8  | -1.5 | 2.8 | 5.0E-05 |
| NM_001193306 | FPR1     | 26.1  | 9.4  | -1.5 | 2.8 | 5.0E-05 |
| NM_014431    | PALD1    | 3.0   | 1.1  | -1.5 | 2.8 | 5.0E-05 |
| NM_000888    | ITGB6    | 3.5   | 1.3  | -1.5 | 2.8 | 5.0E-05 |
| NM_001078    | VCAM1    | 24.4  | 8.8  | -1.5 | 2.8 | 5.0E-05 |
| NM_013271    | PCSK1N   | 12.5  | 4.5  | -1.5 | 2.8 | 5.0E-05 |
| NM_016111    | TELO2    | 33.8  | 12.2 | -1.5 | 2.8 | 5.0E-05 |
| NM_001037666 | GATSL3   | 6.2   | 2.3  | -1.5 | 2.8 | 5.0E-05 |
| NM_001394    | DUSP4    | 2.1   | 0.8  | -1.5 | 2.8 | 5.0E-05 |
| NM_006841    | SLC38A3  | 7.8   | 2.8  | -1.5 | 2.7 | 5.0E-05 |
| NM_001200049 | TTC40    | 2.4   | 0.9  | -1.5 | 2.7 | 5.0E-05 |
| NM_003632    | CNTNAP1  | 16.6  | 6.1  | -1.5 | 2.7 | 5.0E-05 |
| NM_001178032 | ZC4H2    | 5.9   | 2.1  | -1.5 | 2.7 | 5.0E-05 |
| NM_016333    | SRRM2    | 95.2  | 34.8 | -1.5 | 2.7 | 5.0E-05 |
| NM_006343    | MERTK    | 4.1   | 1.5  | -1.5 | 2.7 | 5.0E-05 |
| NM_001206665 | IGSF8    | 27.6  | 10.1 | -1.4 | 2.7 | 5.0E-05 |
| NM_012465    | TLL2     | 4.6   | 1.7  | -1.4 | 2.7 | 5.0E-05 |
| NM_001256335 | PTGES2   | 36.5  | 13.4 | -1.4 | 2.7 | 5.0E-05 |
| NM_005318    | H1FO     | 57.2  | 21.0 | -1.4 | 2.7 | 5.0E-05 |
| NM_001034954 | SORBS1   | 1.6   | 0.6  | -1.4 | 2.7 | 5.0E-05 |
| NM_002166    | ID2      | 77.1  | 28.4 | -1.4 | 2.7 | 5.0E-05 |
| NM_004675    | DIRAS3   | 9.0   | 3.3  | -1.4 | 2.7 | 2.6E-02 |
| NM_001166239 | CGREF1   | 1.5   | 0.5  | -1.4 | 2.7 | 5.0E-05 |
| NM_001024807 | APLP1    | 13.4  | 4.9  | -1.4 | 2.7 | 5.0E-05 |
| NM_001128850 | RRAD     | 64.7  | 23.9 | -1.4 | 2.7 | 5.0E-05 |
| NM_021077    | NMB      | 22.0  | 8.1  | -1.4 | 2.7 | 5.0E-05 |
| NM_001114172 | PIK3R3   | 14.8  | 5.5  | -1.4 | 2.7 | 5.0E-05 |
| NM_001042595 | TMEM91   | 9.3   | 3.4  | -1.4 | 2.7 | 5.0E-05 |
| NM_006033    | LIPG     | 3.5   | 1.3  | -1.4 | 2.7 | 5.0E-05 |
| NM_134268    | CYGB     | 13.0  | 4.9  | -1.4 | 2.7 | 5.0E-05 |
| NM_001172566 | MYD88    | 19.8  | 7.4  | -1.4 | 2.7 | 5.0E-05 |
| NM_001277174 | EFS      | 44.2  | 16.6 | -1.4 | 2.7 | 5.0E-05 |
| NM_001256477 | CMPK2    | 1.8   | 0.7  | -1.4 | 2.7 | 5.0E-05 |
| NM_006120    | HLA-DMA  | 6.8   | 2.6  | -1.4 | 2.7 | 5.0E-05 |
| NM_001243750 | NUDT8    | 6.0   | 2.3  | -1.4 | 2.7 | 5.0E-05 |
| NM_152421    | FAM69B   | 8.5   | 3.2  | -1.4 | 2.7 | 5.0E-05 |

|              |              |      |      |      |     |         |
|--------------|--------------|------|------|------|-----|---------|
| NM_002386    | MC1R         | 65.6 | 24.7 | -1.4 | 2.7 | 5.0E-05 |
| NM_021147    | CCNO         | 4.4  | 1.6  | -1.4 | 2.7 | 5.0E-05 |
| NM_080743    | SRSF12       | 4.9  | 1.9  | -1.4 | 2.6 | 5.0E-05 |
| NM_001258276 | TMEM200A     | 2.3  | 0.9  | -1.4 | 2.6 | 5.0E-05 |
| NM_194272    | RBPMS2       | 9.9  | 3.8  | -1.4 | 2.6 | 5.0E-05 |
| NM_152280    | SYT11        | 10.2 | 3.9  | -1.4 | 2.6 | 5.0E-05 |
| NM_001134851 | TCF7         | 9.6  | 3.7  | -1.4 | 2.6 | 5.0E-05 |
| NM_002975    | CLEC11A      | 4.7  | 1.8  | -1.4 | 2.6 | 5.0E-05 |
| NM_017817    | RAB20        | 30.3 | 11.6 | -1.4 | 2.6 | 5.0E-05 |
| NM_024789    | TMEM180      | 4.5  | 1.7  | -1.4 | 2.6 | 5.0E-05 |
| NM_001127361 | RNF19B       | 13.8 | 5.3  | -1.4 | 2.6 | 5.0E-05 |
| NM_017550    | MIER2        | 12.3 | 4.7  | -1.4 | 2.6 | 5.0E-05 |
| NM_001001794 | DENND6B      | 2.2  | 0.8  | -1.4 | 2.6 | 5.0E-05 |
| NR_024580    | KIAA1984-AS1 | 2.2  | 0.8  | -1.4 | 2.6 | 2.5E-02 |
| NM_001711    | BGN          | 6.5  | 2.5  | -1.4 | 2.6 | 5.0E-05 |
| NM_001077427 | LYPD1        | 17.3 | 6.7  | -1.4 | 2.6 | 5.0E-05 |
| NM_001282349 | OSCAR        | 2.6  | 1.0  | -1.4 | 2.6 | 2.3E-02 |
| NM_006705    | GADD45G      | 5.3  | 2.0  | -1.4 | 2.6 | 5.0E-05 |
| NM_004004    | GJB2         | 3.0  | 1.2  | -1.4 | 2.6 | 5.0E-05 |
| NM_004704    | RRP9         | 30.1 | 11.7 | -1.4 | 2.6 | 5.0E-05 |
| NM_152310    | ELOVL3       | 12.4 | 4.8  | -1.4 | 2.6 | 5.0E-05 |
| NM_020853    | KIAA1467     | 11.3 | 4.4  | -1.4 | 2.6 | 5.0E-05 |
| NM_020770    | CGN          | 2.6  | 1.0  | -1.4 | 2.6 | 5.0E-05 |
| NM_001511    | CXCL1        | 16.6 | 6.5  | -1.4 | 2.6 | 5.0E-05 |
| NM_014600    | EHD3         | 5.5  | 2.1  | -1.4 | 2.6 | 5.0E-05 |
| NM_001496    | GFRA3        | 2.0  | 0.8  | -1.4 | 2.6 | 5.0E-05 |
| NM_000641    | IL11         | 38.0 | 14.8 | -1.4 | 2.6 | 5.0E-05 |
| NM_001032296 | STK24        | 23.5 | 9.2  | -1.4 | 2.6 | 5.0E-05 |
| NM_001184782 | CXorf57      | 2.5  | 1.0  | -1.4 | 2.6 | 5.0E-05 |
| NM_001283009 | RTEL1        | 10.8 | 4.2  | -1.4 | 2.6 | 5.0E-05 |
| NM_012326    | MAPRE3       | 5.3  | 2.1  | -1.4 | 2.5 | 5.0E-05 |
| NM_001347    | DGKQ         | 6.5  | 2.6  | -1.3 | 2.5 | 5.0E-05 |
| NM_005586    | MDFI         | 22.7 | 8.9  | -1.3 | 2.5 | 5.0E-05 |
| NM_024333    | FSD1         | 24.3 | 9.6  | -1.3 | 2.5 | 5.0E-05 |
| NM_012396    | PHLDA3       | 29.9 | 11.8 | -1.3 | 2.5 | 5.0E-05 |
| NM_015149    | RGL1         | 3.0  | 1.2  | -1.3 | 2.5 | 5.0E-05 |
| NM_001127891 | MMP2         | 52.7 | 20.9 | -1.3 | 2.5 | 5.0E-05 |
| NM_024420    | PLA2G4A      | 1.7  | 0.7  | -1.3 | 2.5 | 5.0E-05 |
| NM_004429    | EFNB1        | 27.6 | 11.0 | -1.3 | 2.5 | 5.0E-05 |
| NM_001130033 | PLEKHB1      | 2.2  | 0.9  | -1.3 | 2.5 | 5.0E-05 |
| NM_032488    | CNFN         | 7.6  | 3.0  | -1.3 | 2.5 | 5.0E-05 |
| NM_003745    | SOCS1        | 6.9  | 2.8  | -1.3 | 2.5 | 5.0E-05 |
| NM_207363    | NCKAP5       | 2.7  | 1.1  | -1.3 | 2.5 | 5.0E-05 |
| NM_030762    | BHLHE41      | 2.2  | 0.9  | -1.3 | 2.5 | 5.0E-05 |
| NM_001042414 | PSPC1        | 54.8 | 21.9 | -1.3 | 2.5 | 5.0E-05 |
| NM_001113434 | C17orf51     | 5.4  | 2.2  | -1.3 | 2.5 | 5.0E-05 |
| NM_000121    | EPOR         | 6.7  | 2.7  | -1.3 | 2.5 | 5.0E-05 |
| NM_018670    | MESP1        | 2.6  | 1.0  | -1.3 | 2.5 | 5.0E-05 |
| NM_032623    | MGARP        | 6.8  | 2.7  | -1.3 | 2.5 | 5.0E-05 |
| NM_001002862 | DERL3        | 2.6  | 1.1  | -1.3 | 2.5 | 1.7E-02 |
| NM_001257370 | EME2         | 3.2  | 1.3  | -1.3 | 2.5 | 2.6E-02 |
| NM_024326    | FBXL15       | 5.3  | 2.2  | -1.3 | 2.5 | 5.0E-05 |
| NM_001002913 | PTRH1        | 14.3 | 5.8  | -1.3 | 2.5 | 5.0E-05 |
| NM_001004354 | NRARP        | 1.8  | 0.7  | -1.3 | 2.5 | 5.0E-05 |
| NM_000854    | GSTT2        | 5.2  | 2.1  | -1.3 | 2.5 | 5.0E-05 |
| NM_003247    | THBS2        | 7.7  | 3.1  | -1.3 | 2.5 | 5.0E-05 |
| NM_001034852 | SMOC1        | 7.3  | 3.0  | -1.3 | 2.5 | 5.0E-05 |
| NM_002517    | NPAS1        | 5.8  | 2.4  | -1.3 | 2.5 | 5.0E-05 |
| NM_006324    | CFDP1        | 57.8 | 23.5 | -1.3 | 2.5 | 5.0E-05 |
| NM_000934    | SERPINF2     | 4.7  | 1.9  | -1.3 | 2.5 | 5.0E-05 |
| NM_002333    | LRP3         | 20.5 | 8.3  | -1.3 | 2.5 | 5.0E-05 |



|              |          |       |       |      |     |         |
|--------------|----------|-------|-------|------|-----|---------|
| NM_002220    | ITPKA    | 6.3   | 2.6   | -1.3 | 2.5 | 5.0E-05 |
| NM_000435    | NOTCH3   | 9.4   | 3.8   | -1.3 | 2.5 | 5.0E-05 |
| NM_001098531 | RAPGEF3  | 2.8   | 1.1   | -1.3 | 2.5 | 5.0E-05 |
| NM_032849    | MEDAG    | 4.9   | 2.0   | -1.3 | 2.4 | 5.0E-05 |
| NM_001270377 | ANKRD46  | 6.8   | 2.8   | -1.3 | 2.4 | 5.0E-05 |
| NM_198545    | DRAXIN   | 1.6   | 0.7   | -1.3 | 2.4 | 5.0E-05 |
| NM_004051    | BDH1     | 3.5   | 1.4   | -1.3 | 2.4 | 5.0E-05 |
| NM_007085    | FSTL1    | 354.1 | 145.3 | -1.3 | 2.4 | 5.0E-05 |
| NM_000663    | ABAT     | 3.4   | 1.4   | -1.3 | 2.4 | 5.0E-05 |
| NM_001282766 | POLR1E   | 25.0  | 10.3  | -1.3 | 2.4 | 5.0E-05 |
| NM_001145657 | RAP1GAP  | 2.0   | 0.8   | -1.3 | 2.4 | 5.0E-05 |
| NM_145030    | PPP1R35  | 9.4   | 3.9   | -1.3 | 2.4 | 6.5E-04 |
| NM_001243013 | ABCY9    | 6.8   | 2.8   | -1.3 | 2.4 | 5.0E-05 |
| NM_198552    | FAM89A   | 2.8   | 1.2   | -1.3 | 2.4 | 5.0E-05 |
| NM_153487    | MDGA1    | 3.0   | 1.2   | -1.3 | 2.4 | 5.0E-05 |
| NM_001253846 | GMDS     | 18.3  | 7.6   | -1.3 | 2.4 | 5.0E-05 |
| NM_020979    | SH2B2    | 4.3   | 1.8   | -1.3 | 2.4 | 5.0E-05 |
| NM_212481    | ARID5A   | 5.2   | 2.2   | -1.3 | 2.4 | 5.0E-05 |
| NM_001134830 | AHI1     | 6.9   | 2.9   | -1.3 | 2.4 | 5.0E-05 |
| NM_001165417 | SLC25A11 | 40.0  | 16.6  | -1.3 | 2.4 | 5.0E-05 |
| NM_004186    | SEMA3F   | 20.5  | 8.5   | -1.3 | 2.4 | 5.0E-05 |
| NM_001193308 | SYTL1    | 1.5   | 0.6   | -1.3 | 2.4 | 6.5E-04 |
| NM_001009998 | SSBP4    | 19.5  | 8.1   | -1.3 | 2.4 | 5.0E-05 |
| NM_001130448 | C15orf62 | 18.6  | 7.7   | -1.3 | 2.4 | 5.0E-05 |
| NM_024310    | PLEKHF1  | 4.4   | 1.8   | -1.3 | 2.4 | 5.0E-05 |
| NM_002831    | PTPN6    | 6.0   | 2.5   | -1.3 | 2.4 | 5.0E-05 |
| NM_001127380 | SAA2     | 443.3 | 185.2 | -1.3 | 2.4 | 5.0E-05 |
| NM_001135155 | DPF1     | 4.2   | 1.7   | -1.3 | 2.4 | 5.0E-05 |
| NM_177454    | FAM171B  | 2.8   | 1.2   | -1.3 | 2.4 | 5.0E-05 |
| NM_017870    | TMEM132A | 32.6  | 13.6  | -1.3 | 2.4 | 5.0E-05 |
| NM_017728    | TMEM104  | 8.6   | 3.6   | -1.3 | 2.4 | 5.0E-05 |
| NM_002923    | RGS2     | 35.0  | 14.7  | -1.3 | 2.4 | 5.0E-05 |
| NM_001048265 | C9orf116 | 6.2   | 2.6   | -1.2 | 2.4 | 8.0E-03 |
| NM_002962    | S100A5   | 1.6   | 0.7   | -1.2 | 2.4 | 5.0E-05 |
| NM_005854    | RAMP2    | 4.7   | 2.0   | -1.2 | 2.4 | 5.0E-05 |
| NM_001008223 | C1QL4    | 7.1   | 3.0   | -1.2 | 2.4 | 5.0E-05 |
| NM_001136263 | C2CD4C   | 2.3   | 1.0   | -1.2 | 2.4 | 5.0E-05 |
| NM_021958    | HLX      | 4.3   | 1.8   | -1.2 | 2.4 | 5.0E-05 |
| NM_031945    | TSPAN10  | 2.9   | 1.2   | -1.2 | 2.4 | 5.0E-05 |
| NM_032646    | TTYH2    | 1.7   | 0.7   | -1.2 | 2.4 | 5.0E-05 |
| NM_001177676 | GPR68    | 1.8   | 0.8   | -1.2 | 2.4 | 5.0E-05 |
| NM_001173408 | OBSL1    | 27.6  | 11.7  | -1.2 | 2.3 | 5.0E-05 |
| NM_001670    | ARVCF    | 5.0   | 2.1   | -1.2 | 2.3 | 5.0E-05 |
| NM_001127383 | CYBRD1   | 24.8  | 10.6  | -1.2 | 2.3 | 5.0E-05 |
| NM_001142935 | MXD3     | 9.9   | 4.2   | -1.2 | 2.3 | 1.6E-03 |
| NM_001270422 | KCNJ16   | 7.9   | 3.4   | -1.2 | 2.3 | 5.0E-05 |
| NM_001024844 | CD82     | 54.5  | 23.2  | -1.2 | 2.3 | 5.0E-05 |
| NM_006158    | NEFL     | 2.1   | 0.9   | -1.2 | 2.3 | 5.0E-05 |
| NM_001134422 | CDV3     | 74.0  | 31.6  | -1.2 | 2.3 | 5.0E-05 |
| NM_004443    | EPHB3    | 2.1   | 0.9   | -1.2 | 2.3 | 5.0E-05 |
| NM_001271168 | PCED1A   | 14.3  | 6.1   | -1.2 | 2.3 | 5.0E-05 |
| NM_001029871 | RSPO4    | 5.3   | 2.3   | -1.2 | 2.3 | 5.0E-05 |
| NM_000854    | GSTT2    | 1.8   | 0.8   | -1.2 | 2.3 | 5.0E-05 |
| NM_001103149 | PNMAL1   | 5.0   | 2.1   | -1.2 | 2.3 | 5.0E-05 |
| NM_001485    | GBX2     | 5.1   | 2.2   | -1.2 | 2.3 | 5.0E-05 |
| NM_002203    | ITGA2    | 2.7   | 1.2   | -1.2 | 2.3 | 5.0E-05 |
| NM_001242366 | SLC46A1  | 5.2   | 2.2   | -1.2 | 2.3 | 5.0E-05 |
| NM_001272042 | RPS6KB1  | 9.9   | 4.2   | -1.2 | 2.3 | 5.0E-05 |
| NM_015933    | TMA7     | 351.3 | 150.9 | -1.2 | 2.3 | 5.0E-05 |
| NM_001257386 | ABCG2    | 1.7   | 0.7   | -1.2 | 2.3 | 5.0E-05 |
| NM_001048209 | NTM      | 3.4   | 1.4   | -1.2 | 2.3 | 5.0E-05 |

|              |          |       |      |      |     |         |
|--------------|----------|-------|------|------|-----|---------|
| NM_001547    | IFIT2    | 7.4   | 3.2  | -1.2 | 2.3 | 5.0E-05 |
| NM_181093    | SCYL3    | 1.8   | 0.8  | -1.2 | 2.3 | 1.0E-04 |
| NM_001193414 | TUBA8    | 8.1   | 3.5  | -1.2 | 2.3 | 5.0E-05 |
| NM_032827    | ATOH8    | 21.3  | 9.2  | -1.2 | 2.3 | 5.0E-05 |
| NM_001278557 | WSB2     | 38.6  | 16.7 | -1.2 | 2.3 | 5.0E-05 |
| NM_001010866 | TMEM201  | 17.2  | 7.4  | -1.2 | 2.3 | 5.0E-05 |
| NM_015932    | POMP     | 92.9  | 40.3 | -1.2 | 2.3 | 5.0E-05 |
| NM_001163423 | ZNF580   | 36.7  | 15.9 | -1.2 | 2.3 | 5.0E-05 |
| NM_144617    | HSPB6    | 4.6   | 2.0  | -1.2 | 2.3 | 5.0E-05 |
| NM_001080415 | U2SURP   | 5.1   | 2.2  | -1.2 | 2.3 | 5.0E-05 |
| NM_001257135 | LIF      | 22.0  | 9.6  | -1.2 | 2.3 | 5.0E-05 |
| NM_144593    | RHEBL1   | 11.1  | 4.8  | -1.2 | 2.3 | 5.0E-05 |
| NM_000930    | PLAT     | 61.1  | 26.7 | -1.2 | 2.3 | 5.0E-05 |
| NM_003820    | TNFRSF14 | 4.8   | 2.1  | -1.2 | 2.3 | 5.0E-05 |
| NM_012339    | TSPAN15  | 27.8  | 12.2 | -1.2 | 2.3 | 5.0E-05 |
| NM_001111270 | ARHGEF25 | 5.6   | 2.5  | -1.2 | 2.3 | 5.0E-05 |
| NM_001278794 | NPY4R    | 6.6   | 2.9  | -1.2 | 2.3 | 5.0E-05 |
| NM_014293    | NPTXR    | 14.2  | 6.2  | -1.2 | 2.3 | 5.0E-05 |
| NM_013379    | DPP7     | 29.9  | 13.1 | -1.2 | 2.3 | 5.0E-05 |
| NM_001099781 | GGT5     | 5.0   | 2.2  | -1.2 | 2.3 | 5.0E-05 |
| NM_001859    | SLC31A1  | 17.7  | 7.8  | -1.2 | 2.3 | 5.0E-05 |
| NM_018957    | SH3BP1   | 12.8  | 5.6  | -1.2 | 2.3 | 5.0E-05 |
| NM_173593    | B4GALNT3 | 2.4   | 1.1  | -1.2 | 2.3 | 5.0E-05 |
| NM_000757    | CSF1     | 37.5  | 16.5 | -1.2 | 2.3 | 5.0E-05 |
| NM_032246    | MEX3B    | 3.7   | 1.6  | -1.2 | 2.3 | 5.0E-05 |
| NM_032304    | HAGHL    | 5.8   | 2.5  | -1.2 | 2.3 | 2.0E-04 |
| NM_001278603 | NUP54    | 24.5  | 10.8 | -1.2 | 2.3 | 5.0E-05 |
| NM_000156    | GAMT     | 42.4  | 18.7 | -1.2 | 2.3 | 5.0E-05 |
| NM_001042544 | LTBP4    | 33.7  | 14.9 | -1.2 | 2.3 | 5.0E-05 |
| NM_000434    | NEU1     | 44.1  | 19.5 | -1.2 | 2.3 | 5.0E-05 |
| NM_001031740 | MANEAL   | 1.5   | 0.6  | -1.2 | 2.3 | 5.0E-05 |
| NM_003255    | TIMP2    | 129.0 | 57.1 | -1.2 | 2.3 | 5.0E-05 |
| NM_022658    | HOXC8    | 2.4   | 1.1  | -1.2 | 2.3 | 5.0E-05 |
| NM_032430    | BRSK1    | 4.4   | 2.0  | -1.2 | 2.3 | 5.0E-05 |
| NM_001001436 | C16orf87 | 8.3   | 3.7  | -1.2 | 2.3 | 5.0E-05 |
| NM_001142627 | SEC61A2  | 11.6  | 5.1  | -1.2 | 2.3 | 5.0E-05 |
| NM_001271811 | MED21    | 12.7  | 5.7  | -1.2 | 2.3 | 5.0E-05 |
| NM_001032998 | KYNU     | 5.1   | 2.3  | -1.2 | 2.3 | 5.0E-05 |
| NM_014460    | CSDC2    | 3.5   | 1.6  | -1.2 | 2.3 | 5.0E-05 |
| NM_000213    | ITGB4    | 2.6   | 1.2  | -1.2 | 2.3 | 5.0E-05 |
| NM_021939    | FKBP10   | 87.5  | 38.8 | -1.2 | 2.3 | 5.0E-05 |
| NM_001001503 | NDUFV3   | 31.2  | 13.8 | -1.2 | 2.3 | 5.0E-05 |
| NM_006014    | LAGE3    | 28.3  | 12.6 | -1.2 | 2.2 | 5.0E-05 |
| NM_019065    | NECAB2   | 1.6   | 0.7  | -1.2 | 2.2 | 5.0E-05 |
| NM_001252607 | THBS3    | 9.2   | 4.1  | -1.2 | 2.2 | 5.0E-05 |
| NM_138424    | KIF12    | 4.6   | 2.0  | -1.2 | 2.2 | 5.0E-05 |
| NM_020998    | MST1     | 4.4   | 2.0  | -1.2 | 2.2 | 5.0E-05 |
| NM_001098270 | MGAT3    | 2.5   | 1.1  | -1.2 | 2.2 | 5.0E-05 |
| NM_012205    | HAAO     | 7.5   | 3.3  | -1.2 | 2.2 | 5.0E-05 |
| NM_080430    | SELM     | 51.5  | 23.0 | -1.2 | 2.2 | 5.0E-05 |
| NM_012340    | NFATC2   | 2.5   | 1.1  | -1.2 | 2.2 | 2.0E-03 |
| NM_001130029 | RELL2    | 8.9   | 4.0  | -1.2 | 2.2 | 5.0E-05 |
| NM_001260    | CDK8     | 8.4   | 3.8  | -1.2 | 2.2 | 5.0E-05 |
| NM_021992    | TMSB15A  | 12.9  | 5.8  | -1.2 | 2.2 | 5.0E-05 |
| NM_006221    | PIN1     | 79.4  | 35.7 | -1.2 | 2.2 | 5.0E-05 |
| NM_006443    | DNPH1    | 45.4  | 20.4 | -1.2 | 2.2 | 5.0E-05 |
| NM_001190942 | TNFSF10  | 20.9  | 9.4  | -1.2 | 2.2 | 5.0E-05 |
| NM_003730    | RNASSET2 | 137.0 | 61.6 | -1.2 | 2.2 | 5.0E-05 |
| NM_181900    | STARD5   | 2.3   | 1.0  | -1.2 | 2.2 | 5.0E-05 |
| NM_001006612 | WBP5     | 67.5  | 30.4 | -1.2 | 2.2 | 5.0E-05 |
| NM_001271711 | SLC2A8   | 14.2  | 6.4  | -1.2 | 2.2 | 5.0E-05 |

|              |              |      |      |      |     |         |
|--------------|--------------|------|------|------|-----|---------|
| NM_004102    | FABP3        | 2.5  | 1.1  | -1.2 | 2.2 | 4.4E-03 |
| NM_006103    | WFDC2        | 4.0  | 1.8  | -1.1 | 2.2 | 5.0E-05 |
| NM_001130992 | RBP1         | 5.9  | 2.6  | -1.1 | 2.2 | 5.0E-05 |
| NM_002736    | PRKAR2B      | 1.5  | 0.7  | -1.1 | 2.2 | 5.0E-05 |
| NM_138396    | MARCH9       | 3.0  | 1.3  | -1.1 | 2.2 | 5.0E-05 |
| NM_001204414 | TINAGL1      | 62.1 | 28.1 | -1.1 | 2.2 | 5.0E-05 |
| NM_001185056 | CLDN11       | 12.8 | 5.8  | -1.1 | 2.2 | 5.0E-05 |
| NM_018427    | RRN3         | 23.5 | 10.6 | -1.1 | 2.2 | 5.0E-05 |
| NM_002084    | GPX3         | 27.0 | 12.3 | -1.1 | 2.2 | 5.0E-05 |
| NM_001098519 | LRRC43       | 2.1  | 0.9  | -1.1 | 2.2 | 5.2E-03 |
| NM_018226    | RNPEPL1      | 13.7 | 6.2  | -1.1 | 2.2 | 5.0E-05 |
| NM_032521    | PAR6B        | 1.9  | 0.9  | -1.1 | 2.2 | 5.0E-05 |
| NR_015367    | LOC550643    | 42.8 | 19.4 | -1.1 | 2.2 | 5.0E-05 |
| NM_025161    | C17orf70     | 24.5 | 11.1 | -1.1 | 2.2 | 5.0E-05 |
| NM_021800    | DNAJC12      | 2.9  | 1.3  | -1.1 | 2.2 | 5.0E-05 |
| NM_001202513 | MXD1         | 2.4  | 1.1  | -1.1 | 2.2 | 5.0E-05 |
| NM_025092    | ATHL1        | 3.1  | 1.4  | -1.1 | 2.2 | 5.0E-05 |
| NR_110115    | LOC101927746 | 4.6  | 2.1  | -1.1 | 2.2 | 3.5E-04 |
| NM_004843    | IL27RA       | 19.4 | 8.9  | -1.1 | 2.2 | 5.0E-05 |
| NM_207346    | TSEN54       | 15.8 | 7.2  | -1.1 | 2.2 | 5.0E-05 |
| NM_020698    | TMCC3        | 1.9  | 0.9  | -1.1 | 2.2 | 5.0E-05 |
| NM_002201    | ISG20        | 7.1  | 3.2  | -1.1 | 2.2 | 5.0E-05 |
| NM_052855    | ANKRD40      | 18.3 | 8.4  | -1.1 | 2.2 | 5.0E-05 |
| NM_004925    | AQP3         | 3.3  | 1.5  | -1.1 | 2.2 | 5.0E-05 |
| NM_001145939 | PAFAH1B3     | 50.8 | 23.3 | -1.1 | 2.2 | 5.0E-05 |
| NM_032472    | PPIL3        | 20.2 | 9.3  | -1.1 | 2.2 | 5.0E-05 |
| NM_020533    | MCOLN1       | 15.1 | 6.9  | -1.1 | 2.2 | 5.0E-05 |
| NM_139172    | TMEM190      | 2.0  | 0.9  | -1.1 | 2.2 | 1.0E-04 |
| NM_020777    | SORCS2       | 3.0  | 1.4  | -1.1 | 2.2 | 5.0E-05 |
| NM_000737    | CGB          | 4.6  | 2.1  | -1.1 | 2.2 | 5.0E-05 |
| NM_005755    | EBI3         | 6.7  | 3.1  | -1.1 | 2.2 | 5.0E-05 |
| NM_001145815 | AMDHD2       | 15.1 | 6.9  | -1.1 | 2.2 | 5.0E-05 |
| NM_001171690 | GCAT         | 17.3 | 8.0  | -1.1 | 2.2 | 5.0E-05 |
| NM_001166356 | SHMT2        | 75.2 | 34.8 | -1.1 | 2.2 | 5.0E-05 |
| NM_001193520 | RASAL1       | 5.4  | 2.5  | -1.1 | 2.2 | 5.0E-05 |
| NM_001305    | CLDN4        | 3.0  | 1.4  | -1.1 | 2.2 | 5.0E-05 |
| NM_001271856 | GRASP        | 2.5  | 1.2  | -1.1 | 2.2 | 5.0E-05 |
| NM_001142469 | C16orf45     | 8.3  | 3.9  | -1.1 | 2.2 | 5.0E-05 |
| NM_002246    | KCNK3        | 2.0  | 0.9  | -1.1 | 2.2 | 5.0E-05 |
| NM_001177801 | RANGRF       | 12.7 | 5.9  | -1.1 | 2.1 | 5.0E-05 |
| NR_002736    | SNORD60      | 12.2 | 5.7  | -1.1 | 2.1 | 5.0E-05 |
| NM_001006946 | SDC1         | 36.3 | 16.9 | -1.1 | 2.1 | 5.0E-05 |
| NM_001270879 | MPC1         | 18.3 | 8.5  | -1.1 | 2.1 | 5.0E-05 |
| NM_001163446 | CPA4         | 8.7  | 4.0  | -1.1 | 2.1 | 5.0E-05 |
| NM_005149    | TBX19        | 21.6 | 10.0 | -1.1 | 2.1 | 5.0E-05 |
| NM_138370    | PKDCC        | 4.3  | 2.0  | -1.1 | 2.1 | 5.0E-05 |
| NM_001080425 | BEX4         | 11.5 | 5.4  | -1.1 | 2.1 | 5.0E-05 |
| NM_004941    | DHX8         | 15.6 | 7.3  | -1.1 | 2.1 | 5.0E-05 |
| NR_002196    | H19          | 12.8 | 6.0  | -1.1 | 2.1 | 5.0E-05 |
| NM_080744    | SRCRB4D      | 2.4  | 1.1  | -1.1 | 2.1 | 5.0E-05 |
| NM_004977    | KCNC3        | 2.7  | 1.3  | -1.1 | 2.1 | 5.0E-05 |
| NM_001199017 | LRRC49       | 3.8  | 1.8  | -1.1 | 2.1 | 5.0E-05 |
| NM_001278549 | PDK1         | 9.2  | 4.3  | -1.1 | 2.1 | 5.0E-05 |
| NM_022073    | EGLN3        | 4.8  | 2.2  | -1.1 | 2.1 | 5.0E-05 |
| NM_001130831 | GAS7         | 8.5  | 4.0  | -1.1 | 2.1 | 5.0E-05 |
| NM_005443    | PAPSS1       | 41.2 | 19.4 | -1.1 | 2.1 | 5.0E-05 |
| NR_034084    | LOC729852    | 7.2  | 3.4  | -1.1 | 2.1 | 5.0E-05 |
| NM_013242    | C16orf80     | 43.9 | 20.6 | -1.1 | 2.1 | 5.0E-05 |
| NM_007224    | NXPH4        | 4.3  | 2.0  | -1.1 | 2.1 | 5.0E-05 |
| NR_002809    | LOC338799    | 5.4  | 2.5  | -1.1 | 2.1 | 5.0E-05 |
| NM_002141    | HOXA4        | 9.9  | 4.7  | -1.1 | 2.1 | 2.5E-04 |

|              |          |       |      |      |     |         |
|--------------|----------|-------|------|------|-----|---------|
| NM_004418    | DUSP2    | 13.0  | 6.1  | -1.1 | 2.1 | 5.0E-05 |
| NM_001256604 | C1orf85  | 33.9  | 16.0 | -1.1 | 2.1 | 5.0E-05 |
| NM_001042574 | CRTC3    | 10.8  | 5.1  | -1.1 | 2.1 | 5.0E-05 |
| NM_199336    | FAHD2B   | 9.5   | 4.5  | -1.1 | 2.1 | 5.0E-05 |
| NM_015907    | LAP3     | 32.6  | 15.4 | -1.1 | 2.1 | 5.0E-05 |
| NM_014862    | ARNT2    | 1.5   | 0.7  | -1.1 | 2.1 | 5.0E-05 |
| NM_005950    | MT1G     | 8.1   | 3.8  | -1.1 | 2.1 | 5.0E-05 |
| NM_018004    | TMEM45A  | 9.8   | 4.7  | -1.1 | 2.1 | 5.0E-05 |
| NM_002631    | PGD      | 93.0  | 44.0 | -1.1 | 2.1 | 5.0E-05 |
| NM_001135772 | LRP5L    | 5.0   | 2.4  | -1.1 | 2.1 | 5.0E-05 |
| NM_024524    | ATP13A3  | 58.6  | 27.8 | -1.1 | 2.1 | 5.0E-05 |
| NM_018653    | GPRC5C   | 58.6  | 27.8 | -1.1 | 2.1 | 5.0E-05 |
| NM_004840    | ARHGEF6  | 2.0   | 0.9  | -1.1 | 2.1 | 5.0E-05 |
| NM_004140    | LLGL1    | 29.4  | 14.0 | -1.1 | 2.1 | 5.0E-05 |
| NM_000159    | GCDH     | 9.9   | 4.7  | -1.1 | 2.1 | 5.0E-05 |
| NM_177533    | NUDT14   | 18.8  | 8.9  | -1.1 | 2.1 | 5.0E-05 |
| NM_001015055 | RTKN     | 7.4   | 3.5  | -1.1 | 2.1 | 5.0E-05 |
| NM_006026    | H1FX     | 60.8  | 29.0 | -1.1 | 2.1 | 5.0E-05 |
| NM_001037324 | ECE2     | 15.5  | 7.4  | -1.1 | 2.1 | 5.0E-05 |
| NM_031209    | QTRT1    | 22.6  | 10.8 | -1.1 | 2.1 | 5.0E-05 |
| NM_001008495 | TMEM64   | 22.5  | 10.8 | -1.1 | 2.1 | 5.0E-05 |
| NM_000187    | HGD      | 4.8   | 2.3  | -1.1 | 2.1 | 5.0E-05 |
| NM_052874    | STX1B    | 2.8   | 1.3  | -1.1 | 2.1 | 1.3E-03 |
| NM_152339    | SPATA2L  | 6.6   | 3.1  | -1.1 | 2.1 | 3.5E-03 |
| NR_038831    | HOXA-AS3 | 4.7   | 2.2  | -1.1 | 2.1 | 5.0E-05 |
| NM_001206540 | CAPZB    | 159.4 | 76.4 | -1.1 | 2.1 | 5.0E-05 |
| NM_145057    | CDC42EP5 | 7.9   | 3.8  | -1.1 | 2.1 | 5.0E-05 |
| NM_002121    | HLA-DPB1 | 2.5   | 1.2  | -1.1 | 2.1 | 5.0E-05 |
| NM_032947    | SMIM3    | 54.3  | 26.1 | -1.1 | 2.1 | 5.0E-05 |
| NM_001206528 | CRTAC1   | 5.5   | 2.6  | -1.1 | 2.1 | 5.0E-05 |
| NM_012254    | SLC27A5  | 3.4   | 1.6  | -1.1 | 2.1 | 5.0E-05 |
| NM_001003683 | PDE1A    | 2.5   | 1.2  | -1.1 | 2.1 | 5.0E-05 |
| NM_001130677 | C17orf96 | 7.0   | 3.4  | -1.1 | 2.1 | 5.0E-05 |
| NM_030647    | JHDM1D   | 1.5   | 0.7  | -1.1 | 2.1 | 5.0E-05 |
| NM_001193511 | MAP3K12  | 9.8   | 4.7  | -1.0 | 2.1 | 4.0E-03 |
| NM_014329    | EDC4     | 27.5  | 13.3 | -1.0 | 2.1 | 5.0E-05 |
| NM_001170938 | ISYNA1   | 20.1  | 9.7  | -1.0 | 2.1 | 5.0E-05 |
| NM_033445    | HIST3H2A | 2.2   | 1.1  | -1.0 | 2.1 | 3.0E-04 |
| NM_021258    | IL22RA1  | 2.8   | 1.4  | -1.0 | 2.1 | 5.0E-05 |
| NM_021214    | ABHD17C  | 9.5   | 4.6  | -1.0 | 2.1 | 5.0E-05 |
| NM_002607    | PDGFA    | 4.0   | 2.0  | -1.0 | 2.1 | 5.0E-05 |
| NM_015104    | ATG2A    | 6.5   | 3.1  | -1.0 | 2.1 | 5.0E-05 |
| NM_016399    | TRIAP1   | 27.8  | 13.5 | -1.0 | 2.1 | 6.0E-04 |
| NM_000022    | ADA      | 16.1  | 7.8  | -1.0 | 2.1 | 5.0E-05 |
| NR_003613    | PMS2P1   | 6.2   | 3.0  | -1.0 | 2.1 | 1.3E-03 |
| NM_001172    | ARG2     | 7.5   | 3.6  | -1.0 | 2.1 | 5.0E-05 |
| NM_018973    | DPM3     | 29.9  | 14.6 | -1.0 | 2.0 | 5.0E-05 |
| NM_006133    | DAGLA    | 5.9   | 2.9  | -1.0 | 2.0 | 5.0E-05 |
| NM_001195483 | SLC12A8  | 18.9  | 9.3  | -1.0 | 2.0 | 5.0E-05 |
| NM_001207012 | PGF      | 9.9   | 4.9  | -1.0 | 2.0 | 5.0E-05 |
| NM_001193522 | FAM65A   | 35.5  | 17.4 | -1.0 | 2.0 | 5.0E-05 |
| NM_001135247 | MFAP2    | 64.6  | 31.6 | -1.0 | 2.0 | 5.0E-05 |
| NM_001201466 | ROPN1L   | 2.2   | 1.1  | -1.0 | 2.0 | 5.0E-05 |
| NM_001935    | DPP4     | 3.0   | 1.5  | -1.0 | 2.0 | 5.0E-05 |
| NM_001289123 | TUBB4A   | 7.3   | 3.6  | -1.0 | 2.0 | 5.0E-05 |
| NM_001190918 | THRA     | 9.5   | 4.6  | -1.0 | 2.0 | 5.0E-05 |
| NM_033510    | DISP2    | 4.4   | 2.2  | -1.0 | 2.0 | 5.0E-05 |
| NM_145257    | CCSAP    | 7.0   | 3.4  | -1.0 | 2.0 | 5.0E-05 |
| NM_001077399 | PNKD     | 68.5  | 33.6 | -1.0 | 2.0 | 5.0E-05 |
| NM_001286565 | KIAA0513 | 4.0   | 2.0  | -1.0 | 2.0 | 5.0E-05 |
| NM_001130991 | HYOU1    | 70.7  | 34.7 | -1.0 | 2.0 | 5.0E-05 |

|              |              |       |       |      |     |         |
|--------------|--------------|-------|-------|------|-----|---------|
| NM_020639    | RIPK4        | 6.9   | 3.4   | -1.0 | 2.0 | 5.0E-05 |
| NM_080621    | SAMD10       | 2.5   | 1.3   | -1.0 | 2.0 | 5.0E-05 |
| NM_024792    | FAM57A       | 45.2  | 22.2  | -1.0 | 2.0 | 5.0E-05 |
| NM_001206981 | C4orf26      | 3.0   | 1.5   | -1.0 | 2.0 | 5.0E-05 |
| NM_020795    | NLGN2        | 30.6  | 15.1  | -1.0 | 2.0 | 5.0E-05 |
| NM_000299    | PKP1         | 1.7   | 0.9   | -1.0 | 2.0 | 5.0E-05 |
| NM_001257328 | ARRB2        | 19.3  | 9.5   | -1.0 | 2.0 | 5.0E-05 |
| NM_001286777 | CRISPLD1     | 7.2   | 3.5   | -1.0 | 2.0 | 5.0E-05 |
| NM_001406    | EFNB3        | 10.4  | 5.2   | -1.0 | 2.0 | 5.0E-05 |
| NM_001258307 | CCDC74B      | 3.9   | 1.9   | -1.0 | 2.0 | 5.0E-05 |
| NM_032512    | PDZD4        | 2.8   | 1.4   | -1.0 | 2.0 | 5.0E-05 |
| NM_018356    | C5orf22      | 16.5  | 8.1   | -1.0 | 2.0 | 5.0E-05 |
| NM_017813    | IMPAD1       | 27.5  | 13.6  | -1.0 | 2.0 | 5.0E-05 |
| NM_020315    | PDXP         | 11.9  | 5.9   | -1.0 | 2.0 | 5.0E-05 |
| NM_001287580 | RBKS         | 5.6   | 2.8   | -1.0 | 2.0 | 1.9E-03 |
| NM_032437    | EFCAB7       | 3.6   | 1.8   | -1.0 | 2.0 | 5.0E-05 |
| NM_153221    | CILP2        | 6.6   | 3.3   | -1.0 | 2.0 | 5.0E-05 |
| NM_024520    | C2orf47      | 16.2  | 8.0   | -1.0 | 2.0 | 5.0E-05 |
| NM_030579    | CYB5B        | 29.3  | 14.5  | -1.0 | 2.0 | 5.0E-05 |
| NM_024329    | EFHD2        | 31.1  | 15.4  | -1.0 | 2.0 | 5.0E-05 |
| NM_000439    | PCSK1        | 1.8   | 0.9   | -1.0 | 2.0 | 5.0E-05 |
| NM_004112    | FGF11        | 7.1   | 3.5   | -1.0 | 2.0 | 5.0E-05 |
| NM_138358    | C19orf52     | 12.4  | 6.1   | -1.0 | 2.0 | 1.0E-04 |
| NM_001048212 | CEMP1        | 10.0  | 5.0   | -1.0 | 2.0 | 5.0E-05 |
| NM_020879    | CCDC146      | 2.0   | 1.0   | -1.0 | 2.0 | 5.0E-05 |
| NM_012079    | DGAT1        | 8.6   | 4.3   | -1.0 | 2.0 | 5.0E-05 |
| NM_004223    | UBE2L6       | 43.5  | 21.6  | -1.0 | 2.0 | 5.0E-05 |
| NM_001174097 | LDHB         | 715.2 | 355.8 | -1.0 | 2.0 | 5.0E-05 |
| NM_001039574 | KCNC4        | 1.6   | 0.8   | -1.0 | 2.0 | 5.0E-05 |
| NM_001023567 | GOLGA8B      | 18.5  | 9.2   | -1.0 | 2.0 | 5.0E-05 |
| NM_000561    | GSTM1        | 21.4  | 10.6  | -1.0 | 2.0 | 5.0E-05 |
| NM_013241    | FHOD1        | 18.7  | 9.3   | -1.0 | 2.0 | 5.0E-05 |
| NM_173564    | NYAP1        | 1.5   | 0.7   | -1.0 | 2.0 | 5.0E-05 |
| NM_001007026 | ATN1         | 201.1 | 100.2 | -1.0 | 2.0 | 5.0E-05 |
| NM_032343    | CHCHD6       | 16.7  | 8.3   | -1.0 | 2.0 | 5.0E-05 |
| NM_002281    | KRT81        | 31.9  | 15.9  | -1.0 | 2.0 | 5.0E-05 |
| NM_178448    | SAPCD2       | 8.5   | 4.2   | -1.0 | 2.0 | 5.0E-05 |
| NR_033959    | LOC100506060 | 4.8   | 2.4   | -1.0 | 2.0 | 5.0E-05 |
| NM_004569    | PIGH         | 14.3  | 7.1   | -1.0 | 2.0 | 5.0E-05 |
| NM_017623    | CNNM3        | 7.5   | 3.7   | -1.0 | 2.0 | 5.0E-05 |
| NM_005052    | RAC3         | 17.7  | 8.8   | -1.0 | 2.0 | 5.0E-05 |
| NM_032683    | MPV17L2      | 22.9  | 11.4  | -1.0 | 2.0 | 5.0E-05 |
| NR_015454    | MAFG-AS1     | 2.8   | 1.4   | -1.0 | 2.0 | 2.0E-02 |
| NM_005101    | ISG15        | 100.9 | 50.4  | -1.0 | 2.0 | 5.0E-05 |
| NM_001242487 | ZSWIM8       | 18.5  | 9.3   | -1.0 | 2.0 | 5.0E-05 |
| NM_018285    | IMP3         | 29.1  | 14.5  | -1.0 | 2.0 | 5.0E-05 |
| NM_004497    | FOXA3        | 1.5   | 0.8   | -1.0 | 2.0 | 5.0E-05 |
| NM_002133    | HMOX1        | 37.5  | 18.7  | -1.0 | 2.0 | 5.0E-05 |
| NM_001129    | AEBP1        | 6.7   | 3.4   | -1.0 | 2.0 | 5.0E-05 |
| NM_001032279 | RCE1         | 27.0  | 13.5  | -1.0 | 2.0 | 5.0E-05 |
| NM_001129891 | FAM196B      | 1.5   | 0.7   | -1.0 | 2.0 | 6.0E-04 |
| NM_001142622 | GHDC         | 6.9   | 3.5   | -1.0 | 2.0 | 5.0E-05 |
| NM_207370    | GPR153       | 7.8   | 3.9   | -1.0 | 2.0 | 5.0E-05 |
| NM_001001994 | GPM6B        | 2.1   | 1.0   | -1.0 | 2.0 | 5.0E-05 |
| NM_004096    | EIF4EBP2     | 28.7  | 14.4  | -1.0 | 2.0 | 5.0E-05 |
| NM_001206696 | IRF6         | 1.7   | 0.8   | -1.0 | 2.0 | 5.0E-05 |
| NM_001130720 | AHCYL2       | 4.2   | 2.1   | -1.0 | 2.0 | 5.0E-05 |
| NM_018367    | ACER3        | 9.4   | 4.7   | -1.0 | 2.0 | 5.0E-05 |
| NM_033513    | TPGS1        | 11.5  | 5.8   | -1.0 | 2.0 | 5.0E-05 |
| NM_001197216 | ASGR1        | 2.1   | 1.1   | -1.0 | 2.0 | 5.0E-05 |
| NM_001005407 | CACNA1H      | 3.6   | 1.8   | -1.0 | 2.0 | 5.0E-05 |

|              |            |        |       |      |     |         |
|--------------|------------|--------|-------|------|-----|---------|
| NM_001172774 | DPY19L3    | 7.7    | 3.9   | -1.0 | 2.0 | 5.0E-05 |
| NM_001008701 | LPHN1      | 5.1    | 2.6   | -1.0 | 2.0 | 5.0E-05 |
| NM_001172700 | SHROOM1    | 11.6   | 5.9   | -1.0 | 2.0 | 5.0E-05 |
| NM_001164410 | CDK5       | 23.7   | 12.0  | -1.0 | 2.0 | 5.0E-05 |
| NM_001083926 | ASRGL1     | 18.2   | 9.2   | -1.0 | 2.0 | 5.0E-05 |
| NM_001217    | CA11       | 2.8    | 1.4   | -1.0 | 2.0 | 5.0E-05 |
| NM_015320    | ARHGEF4    | 1.5    | 0.7   | -1.0 | 2.0 | 5.0E-05 |
| NM_004750    | CRLF1      | 17.3   | 8.8   | -1.0 | 2.0 | 5.0E-05 |
| NM_001031709 | RNLS       | 3.7    | 1.9   | -1.0 | 2.0 | 5.0E-05 |
| NM_000941    | POR        | 52.1   | 26.4  | -1.0 | 2.0 | 5.0E-05 |
| NM_133468    | BMPER      | 1.8    | 0.9   | -1.0 | 2.0 | 5.0E-05 |
| NM_000701    | ATP1A1     | 159.0  | 80.7  | -1.0 | 2.0 | 5.0E-05 |
| NM_016229    | CYB5R2     | 2.8    | 1.4   | -1.0 | 2.0 | 5.0E-05 |
| NM_015141    | GPD1L      | 6.1    | 3.1   | -1.0 | 2.0 | 5.0E-05 |
| NM_001131064 | ACP2       | 24.6   | 12.5  | -1.0 | 2.0 | 5.0E-05 |
| NM_001171971 | CDHR1      | 17.7   | 9.0   | -1.0 | 2.0 | 5.0E-05 |
| NM_002850    | PTPRS      | 23.7   | 12.1  | -1.0 | 2.0 | 5.0E-05 |
| NM_138801    | GALM       | 5.6    | 2.8   | -1.0 | 2.0 | 5.0E-05 |
| NM_001032409 | OAS1       | 4.5    | 2.3   | -1.0 | 2.0 | 5.0E-05 |
| NM_001164462 | MUC12      | 3.4    | 1.7   | -1.0 | 2.0 | 2.5E-03 |
| NM_001039503 | PRSS53     | 179.4  | 91.4  | -1.0 | 2.0 | 5.0E-05 |
| NM_001032367 | SPINT1     | 23.0   | 11.7  | -1.0 | 2.0 | 5.0E-05 |
| NM_032142    | CEP192     | 7.4    | 3.8   | -1.0 | 2.0 | 5.0E-05 |
| NM_001271893 | TWIST2     | 1.7    | 0.8   | -1.0 | 2.0 | 5.0E-05 |
| NM_001042535 | AGAP3      | 29.2   | 14.9  | -1.0 | 2.0 | 5.0E-05 |
| NM_001015002 | LLGL2      | 6.1    | 3.1   | -1.0 | 2.0 | 5.0E-05 |
| NM_001126181 | NRGN       | 27.4   | 14.0  | -1.0 | 2.0 | 5.0E-05 |
| NM_001258446 | TOP1MT     | 7.1    | 3.6   | -1.0 | 2.0 | 5.0E-05 |
| NM_002609    | PDGFRB     | 16.6   | 8.5   | -1.0 | 2.0 | 5.0E-05 |
| NM_006688    | C1QL1      | 87.7   | 44.8  | -1.0 | 2.0 | 5.0E-05 |
| NM_015161    | ARL6IP1    | 185.9  | 95.1  | -1.0 | 2.0 | 5.0E-05 |
| NM_001083885 | DFNB31     | 5.0    | 2.6   | -1.0 | 2.0 | 5.0E-05 |
| NM_001166449 | ITIH4      | 11.7   | 6.0   | -1.0 | 2.0 | 5.0E-05 |
| NM_016217    | HECA       | 3.2    | 1.7   | -1.0 | 2.0 | 5.0E-05 |
| NM_001283034 | FAM92A1    | 11.0   | 5.6   | -1.0 | 2.0 | 5.0E-05 |
| NM_001270407 | JAM2       | 2.5    | 1.3   | -1.0 | 2.0 | 5.0E-05 |
| NM_001166347 | SLC26A11   | 10.2   | 5.2   | -1.0 | 2.0 | 5.0E-05 |
| NM_001286496 | PIF1       | 6.7    | 3.4   | -1.0 | 2.0 | 5.0E-05 |
| NM_014507    | MCAT       | 11.1   | 5.7   | -1.0 | 2.0 | 5.0E-05 |
| NM_005220    | DLX3       | 1.7    | 0.9   | -1.0 | 2.0 | 5.0E-05 |
| NM_005576    | LOXL1      | 33.8   | 17.3  | -1.0 | 2.0 | 5.0E-05 |
| NM_007260    | LYPLA2     | 46.6   | 23.9  | -1.0 | 1.9 | 5.0E-05 |
| NM_053279    | FAM167A    | 23.3   | 12.0  | -1.0 | 1.9 | 5.0E-05 |
| NM_002855    | PVRL1      | 9.5    | 4.9   | -1.0 | 1.9 | 5.0E-05 |
| NM_002982    | CCL2       | 7.0    | 3.6   | -1.0 | 1.9 | 5.0E-05 |
| NM_021095    | SLC5A6     | 22.0   | 11.3  | -1.0 | 1.9 | 5.0E-05 |
| NM_032409    | PINK1      | 47.3   | 24.3  | -1.0 | 1.9 | 1.8E-03 |
| NM_175039    | ST6GALNAC4 | 16.1   | 8.3   | -1.0 | 1.9 | 5.0E-05 |
| NM_001282446 | YAE1D1     | 10.4   | 5.4   | -1.0 | 1.9 | 5.0E-05 |
| NM_024871    | MAP6D1     | 6.9    | 3.6   | -1.0 | 1.9 | 5.0E-05 |
| NM_024818    | UBA5       | 17.3   | 8.9   | -1.0 | 1.9 | 5.0E-05 |
| NM_003281    | TNNI1      | 2.3    | 1.2   | -1.0 | 1.9 | 5.0E-05 |
| NM_007006    | NUDT21     | 46.8   | 24.2  | -1.0 | 1.9 | 5.0E-05 |
| NM_003080    | SMPD2      | 6.3    | 3.3   | -1.0 | 1.9 | 5.0E-05 |
| NM_001042422 | SLC16A3    | 442.5  | 228.9 | -1.0 | 1.9 | 5.0E-05 |
| NM_001145396 | ALDH16A1   | 16.5   | 8.5   | -1.0 | 1.9 | 5.0E-05 |
| NM_152345    | ANKRD13B   | 4.9    | 2.5   | -1.0 | 1.9 | 5.0E-05 |
| NM_001159287 | TPI1       | 1038.8 | 537.7 | -0.9 | 1.9 | 5.0E-05 |
| NM_152911    | PAOX       | 4.0    | 2.1   | -0.9 | 1.9 | 5.0E-05 |
| NM_003239    | TGFB3      | 1.9    | 1.0   | -0.9 | 1.9 | 5.0E-05 |
| NM_004711    | SYNGR1     | 18.0   | 9.4   | -0.9 | 1.9 | 5.0E-05 |

|              |           |       |       |      |     |         |
|--------------|-----------|-------|-------|------|-----|---------|
| NM_005415    | SLC20A1   | 107.1 | 55.6  | -0.9 | 1.9 | 5.0E-05 |
| NM_001127320 | UBAP2L    | 67.8  | 35.2  | -0.9 | 1.9 | 5.0E-05 |
| NM_001277233 | TM7SF2    | 30.2  | 15.7  | -0.9 | 1.9 | 5.0E-05 |
| NM_030576    | LIMD2     | 13.8  | 7.2   | -0.9 | 1.9 | 5.0E-05 |
| NM_001172415 | BAG1      | 7.1   | 3.7   | -0.9 | 1.9 | 5.0E-05 |
| NM_005434    | MALL      | 12.7  | 6.6   | -0.9 | 1.9 | 5.0E-05 |
| NM_001160047 | TXNDC16   | 6.8   | 3.6   | -0.9 | 1.9 | 5.0E-05 |
| NM_001163817 | DHCR7     | 38.0  | 19.8  | -0.9 | 1.9 | 5.0E-05 |
| NM_138401    | MVB12A    | 22.7  | 11.8  | -0.9 | 1.9 | 5.0E-05 |
| NM_001166111 | PNPLA6    | 22.3  | 11.7  | -0.9 | 1.9 | 5.0E-05 |
| NM_002345    | LUM       | 17.7  | 9.3   | -0.9 | 1.9 | 5.0E-05 |
| NM_001079533 | CPEB1     | 1.5   | 0.8   | -0.9 | 1.9 | 5.0E-05 |
| NM_001099952 | ITPR1     | 3.7   | 1.9   | -0.9 | 1.9 | 5.0E-05 |
| NM_001142861 | SMAD6     | 16.0  | 8.4   | -0.9 | 1.9 | 5.0E-05 |
| NM_018584    | CAMK2N1   | 4.3   | 2.2   | -0.9 | 1.9 | 5.0E-05 |
| NM_001195218 | DCXR      | 61.6  | 32.3  | -0.9 | 1.9 | 5.0E-05 |
| NM_015956    | MRPL4     | 46.6  | 24.5  | -0.9 | 1.9 | 5.0E-05 |
| NM_003693    | SCARF1    | 4.0   | 2.1   | -0.9 | 1.9 | 5.0E-05 |
| NM_005027    | PIK3R2    | 70.4  | 37.0  | -0.9 | 1.9 | 5.0E-05 |
| NM_001146158 | MOGS      | 27.8  | 14.6  | -0.9 | 1.9 | 5.0E-05 |
| NM_001253891 | DGAT2     | 3.6   | 1.9   | -0.9 | 1.9 | 5.0E-05 |
| NM_001018070 | CORO1B    | 46.6  | 24.6  | -0.9 | 1.9 | 5.0E-05 |
| NM_199285    | PRR19     | 3.6   | 1.9   | -0.9 | 1.9 | 1.5E-04 |
| NM_022726    | ELOVL4    | 4.3   | 2.3   | -0.9 | 1.9 | 5.0E-05 |
| NM_001077262 | UBXN11    | 10.6  | 5.6   | -0.9 | 1.9 | 5.0E-05 |
| NM_152285    | ARRDC1    | 13.6  | 7.2   | -0.9 | 1.9 | 5.0E-05 |
| NM_018649    | H2AFY2    | 18.2  | 9.6   | -0.9 | 1.9 | 5.0E-05 |
| NM_001128141 | DPEP1     | 2.1   | 1.1   | -0.9 | 1.9 | 5.0E-05 |
| NM_005475    | SH2B3     | 19.0  | 10.0  | -0.9 | 1.9 | 5.0E-05 |
| NM_013324    | CISH      | 1.9   | 1.0   | -0.9 | 1.9 | 5.0E-05 |
| NM_014936    | ENPP4     | 3.8   | 2.0   | -0.9 | 1.9 | 5.0E-05 |
| NM_033254    | BOC       | 5.0   | 2.6   | -0.9 | 1.9 | 5.0E-05 |
| NM_001143780 | SLC25A39  | 80.3  | 42.5  | -0.9 | 1.9 | 5.0E-05 |
| NM_020338    | ZMIZ1     | 20.6  | 10.9  | -0.9 | 1.9 | 5.0E-05 |
| NM_016113    | TRPV2     | 1.9   | 1.0   | -0.9 | 1.9 | 5.0E-05 |
| NM_002758    | MAP2K6    | 2.2   | 1.2   | -0.9 | 1.9 | 6.0E-04 |
| NM_138462    | ZMYND19   | 30.3  | 16.1  | -0.9 | 1.9 | 5.0E-05 |
| NM_001031677 | RAB24     | 21.9  | 11.6  | -0.9 | 1.9 | 5.0E-05 |
| NM_001103160 | SH2D5     | 3.1   | 1.7   | -0.9 | 1.9 | 5.0E-05 |
| NM_001143943 | EFCAB2    | 5.8   | 3.1   | -0.9 | 1.9 | 5.0E-05 |
| NM_001202439 | NCR3LG1   | 1.8   | 1.0   | -0.9 | 1.9 | 5.0E-05 |
| NM_001206878 | CTDSP1    | 27.9  | 14.8  | -0.9 | 1.9 | 5.0E-05 |
| NM_001080824 | TRABD2A   | 33.5  | 17.8  | -0.9 | 1.9 | 5.0E-05 |
| NM_005044    | PRKX      | 6.0   | 3.2   | -0.9 | 1.9 | 5.0E-05 |
| NM_007284    | TWF2      | 66.2  | 35.2  | -0.9 | 1.9 | 5.0E-05 |
| NM_001129727 | PLEKHG4   | 7.3   | 3.9   | -0.9 | 1.9 | 5.0E-05 |
| NM_000402    | G6PD      | 72.3  | 38.4  | -0.9 | 1.9 | 5.0E-05 |
| NM_001166392 | TPBG      | 8.0   | 4.2   | -0.9 | 1.9 | 5.0E-05 |
| NM_012168    | FBXO2     | 3.1   | 1.7   | -0.9 | 1.9 | 1.5E-04 |
| NM_013439    | PILRA     | 1.5   | 0.8   | -0.9 | 1.9 | 5.0E-05 |
| NM_002229    | JUNB      | 37.3  | 19.9  | -0.9 | 1.9 | 5.0E-05 |
| NM_001134875 | C14orf80  | 406.7 | 216.4 | -0.9 | 1.9 | 5.0E-05 |
| NM_020375    | C12orf5   | 5.1   | 2.7   | -0.9 | 1.9 | 5.0E-05 |
| NM_001170726 | GPR137    | 20.6  | 11.0  | -0.9 | 1.9 | 5.0E-05 |
| NR_027032    | AGAP2-AS1 | 5.2   | 2.8   | -0.9 | 1.9 | 5.0E-05 |
| NM_004147    | DRG1      | 60.1  | 32.1  | -0.9 | 1.9 | 5.0E-05 |
| NM_015102    | NPHP4     | 6.1   | 3.3   | -0.9 | 1.9 | 5.0E-05 |
| NM_001039477 | THEMIS2   | 4.4   | 2.3   | -0.9 | 1.9 | 5.0E-05 |
| NM_145640    | APOL3     | 4.2   | 2.3   | -0.9 | 1.9 | 5.0E-05 |
| NM_003137    | SRPK1     | 23.6  | 12.6  | -0.9 | 1.9 | 5.0E-05 |
| NM_006455    | LEPREL4   | 23.7  | 12.7  | -0.9 | 1.9 | 5.0E-05 |

|              |                 |       |      |      |     |         |
|--------------|-----------------|-------|------|------|-----|---------|
| NM_001164741 | ARHGAP4         | 1.8   | 1.0  | -0.9 | 1.9 | 5.0E-05 |
| NM_000189    | HK2             | 6.8   | 3.6  | -0.9 | 1.9 | 5.0E-05 |
| NM_001005915 | ERBB3           | 1.5   | 0.8  | -0.9 | 1.9 | 5.0E-05 |
| NM_018275    | C7orf43         | 9.9   | 5.3  | -0.9 | 1.9 | 5.0E-05 |
| NM_006735    | HOXA2           | 16.4  | 8.8  | -0.9 | 1.9 | 5.0E-05 |
| NM_001271904 | GSKIP           | 18.2  | 9.8  | -0.9 | 1.9 | 5.0E-05 |
| NM_030978    | ARPC5L          | 65.5  | 35.0 | -0.9 | 1.9 | 5.0E-05 |
| NM_173687    | C8orf31         | 2.4   | 1.3  | -0.9 | 1.9 | 5.0E-05 |
| NM_032271    | TRAF7           | 23.4  | 12.5 | -0.9 | 1.9 | 5.0E-05 |
| NM_080677    | DYNLL2          | 46.4  | 24.9 | -0.9 | 1.9 | 5.0E-05 |
| NM_001284355 | AMZ1            | 8.4   | 4.5  | -0.9 | 1.9 | 5.0E-05 |
| NM_001127325 | MAD2L2          | 67.1  | 36.0 | -0.9 | 1.9 | 5.0E-05 |
| NM_004127    | GPS1            | 70.9  | 38.0 | -0.9 | 1.9 | 5.0E-05 |
| NM_016234    | ACSL5           | 2.4   | 1.3  | -0.9 | 1.9 | 5.0E-05 |
| NM_001946    | DUSP6           | 7.7   | 4.1  | -0.9 | 1.9 | 5.0E-05 |
| NM_003093    | SNRPC           | 102.6 | 55.1 | -0.9 | 1.9 | 5.0E-05 |
| NM_001146310 | C1orf86         | 54.9  | 29.6 | -0.9 | 1.9 | 5.0E-05 |
| NM_032412    | CYSTM1          | 42.9  | 23.1 | -0.9 | 1.9 | 5.0E-05 |
| NM_001204103 | PPT2            | 21.2  | 11.4 | -0.9 | 1.9 | 5.0E-05 |
| NM_001286554 | USP49           | 5.0   | 2.7  | -0.9 | 1.9 | 5.0E-05 |
| NM_032310    | C9orf89         | 23.0  | 12.4 | -0.9 | 1.9 | 5.0E-05 |
| NM_032902    | PPP1R16A        | 12.5  | 6.7  | -0.9 | 1.9 | 5.0E-05 |
| NM_000543    | SMPD1           | 29.0  | 15.7 | -0.9 | 1.9 | 5.0E-05 |
| NM_004322    | BAD             | 52.3  | 28.2 | -0.9 | 1.9 | 5.0E-05 |
| NM_000283    | PDE6B           | 2.6   | 1.4  | -0.9 | 1.9 | 5.0E-05 |
| NM_001009936 | PHF19           | 31.4  | 17.0 | -0.9 | 1.9 | 5.0E-05 |
| NM_012333    | GJA9-MYCBPMYCBP | 20.9  | 11.3 | -0.9 | 1.9 | 5.0E-05 |
| NM_014367    | FAM162A         | 75.7  | 40.9 | -0.9 | 1.8 | 5.0E-05 |
| NM_030622    | CYP2S1          | 4.9   | 2.6  | -0.9 | 1.8 | 5.0E-05 |
| NM_025245    | PBX4            | 6.5   | 3.5  | -0.9 | 1.8 | 5.0E-05 |
| NM_020771    | HACE1           | 6.4   | 3.4  | -0.9 | 1.8 | 5.0E-05 |
| NM_001085354 | MORC4           | 13.1  | 7.1  | -0.9 | 1.8 | 5.0E-05 |
| NM_001195278 | TMEM178B        | 9.2   | 5.0  | -0.9 | 1.8 | 5.0E-05 |
| NM_020862    | LRFN1           | 1.6   | 0.9  | -0.9 | 1.8 | 5.0E-05 |
| NM_001077497 | PRR3            | 6.0   | 3.3  | -0.9 | 1.8 | 5.0E-04 |
| NM_002513    | NME3            | 69.9  | 37.9 | -0.9 | 1.8 | 5.0E-05 |
| NR_038393    | LOC100506178    | 2.0   | 1.1  | -0.9 | 1.8 | 5.0E-05 |
| NM_001100818 | PID1            | 23.7  | 12.9 | -0.9 | 1.8 | 5.0E-05 |
| NM_003685    | KHSRP           | 88.0  | 47.7 | -0.9 | 1.8 | 5.0E-05 |
| NM_017842    | SLC48A1         | 12.1  | 6.6  | -0.9 | 1.8 | 5.0E-05 |
| NM_000367    | TPMT            | 15.1  | 8.2  | -0.9 | 1.8 | 5.0E-05 |
| NM_001207009 | ZNF497          | 4.4   | 2.4  | -0.9 | 1.8 | 5.0E-05 |
| NM_016466    | ANKRD39         | 14.7  | 8.0  | -0.9 | 1.8 | 5.0E-05 |
| NM_001080396 | FAM155A         | 2.3   | 1.2  | -0.9 | 1.8 | 5.0E-05 |
| NM_012401    | PLXNB2          | 63.1  | 34.3 | -0.9 | 1.8 | 5.0E-05 |
| NR_024031    | DANCR           | 31.1  | 16.9 | -0.9 | 1.8 | 5.0E-05 |
| NM_213720    | CHCHD10         | 33.3  | 18.1 | -0.9 | 1.8 | 5.0E-05 |
| NM_022835    | PLEKHG2         | 10.3  | 5.6  | -0.9 | 1.8 | 5.0E-05 |
| NM_025232    | REEP4           | 51.7  | 28.2 | -0.9 | 1.8 | 5.0E-05 |
| NM_024571    | SNRNP25         | 96.1  | 52.3 | -0.9 | 1.8 | 5.0E-05 |
| NM_001860    | SLC31A2         | 4.7   | 2.5  | -0.9 | 1.8 | 1.1E-03 |
| NM_001286562 | C6orf211        | 34.3  | 18.7 | -0.9 | 1.8 | 5.0E-05 |
| NM_012338    | TSPAN12         | 2.0   | 1.1  | -0.9 | 1.8 | 5.0E-05 |
| NM_001135242 | NDRG1           | 23.8  | 13.0 | -0.9 | 1.8 | 5.0E-05 |
| NM_001131027 | PDLIM4          | 75.9  | 41.4 | -0.9 | 1.8 | 5.0E-05 |
| NM_017818    | WRAP73          | 8.5   | 4.7  | -0.9 | 1.8 | 5.0E-05 |
| NM_003635    | NDST2           | 7.0   | 3.8  | -0.9 | 1.8 | 5.0E-05 |
| NM_016582    | SLC15A3         | 6.2   | 3.4  | -0.9 | 1.8 | 5.0E-04 |
| NM_001202858 | ECM1            | 33.7  | 18.4 | -0.9 | 1.8 | 5.0E-05 |
| NM_001256196 | ARAF            | 31.5  | 17.2 | -0.9 | 1.8 | 5.0E-05 |
| NM_001098540 | HPSE            | 11.4  | 6.2  | -0.9 | 1.8 | 5.0E-05 |



|              |         |        |        |      |     |         |
|--------------|---------|--------|--------|------|-----|---------|
| NM_001190201 | CES4A   | 5.2    | 2.8    | -0.9 | 1.8 | 5.0E-05 |
| NM_001024937 | MINK1   | 21.9   | 12.0   | -0.9 | 1.8 | 5.0E-05 |
| NM_001040875 | GDAP1   | 9.4    | 5.2    | -0.9 | 1.8 | 5.0E-05 |
| NM_006369    | LRRC41  | 27.5   | 15.0   | -0.9 | 1.8 | 5.0E-05 |
| NM_001190411 | RPH3AL  | 3.0    | 1.6    | -0.9 | 1.8 | 5.0E-05 |
| NM_001040167 | LFNG    | 44.6   | 24.5   | -0.9 | 1.8 | 5.0E-05 |
| NM_153046    | TDRD9   | 8.2    | 4.5    | -0.9 | 1.8 | 5.0E-05 |
| NM_001276435 | KCNJ15  | 48.7   | 26.7   | -0.9 | 1.8 | 5.0E-05 |
| NM_001289164 | LOXL3   | 3.8    | 2.1    | -0.9 | 1.8 | 3.4E-03 |
| NM_001206998 | ZNRF3   | 9.1    | 5.0    | -0.9 | 1.8 | 5.0E-05 |
| NM_032102    | SRSF8   | 4.4    | 2.4    | -0.9 | 1.8 | 5.0E-05 |
| NM_001004431 | METRNL  | 52.7   | 28.9   | -0.9 | 1.8 | 5.0E-05 |
| NM_001134758 | ARFRP1  | 11.9   | 6.5    | -0.9 | 1.8 | 6.5E-04 |
| NM_001130848 | PITPNM1 | 24.7   | 13.6   | -0.9 | 1.8 | 5.0E-05 |
| NM_001099652 | GPR137C | 7.5    | 4.1    | -0.9 | 1.8 | 5.0E-05 |
| NM_001257994 | TRMT2A  | 10.4   | 5.7    | -0.9 | 1.8 | 2.4E-03 |
| NM_001167676 | FAM229A | 2.7    | 1.5    | -0.9 | 1.8 | 5.0E-05 |
| NM_005522    | HOXA1   | 3.9    | 2.2    | -0.9 | 1.8 | 1.6E-02 |
| NM_001039580 | MAP9    | 4.1    | 2.3    | -0.9 | 1.8 | 5.0E-05 |
| NM_001164267 | WDR46   | 31.4   | 17.3   | -0.9 | 1.8 | 5.0E-05 |
| NM_015541    | LRIG1   | 9.7    | 5.3    | -0.9 | 1.8 | 5.0E-05 |
| NM_006896    | HOXA7   | 2.3    | 1.3    | -0.9 | 1.8 | 1.6E-02 |
| NM_001142391 | SLC10A3 | 57.3   | 31.6   | -0.9 | 1.8 | 5.0E-05 |
| NM_015155    | LARP4B  | 15.3   | 8.4    | -0.9 | 1.8 | 5.0E-05 |
| NM_001256534 | SLC25A1 | 76.0   | 41.9   | -0.9 | 1.8 | 5.0E-05 |
| NM_002238    | KCNH1   | 4.9    | 2.7    | -0.9 | 1.8 | 5.0E-05 |
| NM_178820    | FBXO27  | 3.4    | 1.9    | -0.9 | 1.8 | 5.0E-05 |
| NM_000075    | CDK4    | 86.5   | 47.8   | -0.9 | 1.8 | 5.0E-05 |
| NM_001135911 | PIK3IP1 | 5.1    | 2.8    | -0.9 | 1.8 | 5.0E-05 |
| NM_001170806 | C8orf47 | 1.8    | 1.0    | -0.9 | 1.8 | 5.0E-05 |
| NM_001040454 | SLC26A6 | 22.3   | 12.3   | -0.9 | 1.8 | 5.0E-05 |
| NM_058164    | OLFM2   | 4.7    | 2.6    | -0.9 | 1.8 | 5.0E-05 |
| NM_032740    | SFT2D3  | 4.1    | 2.3    | -0.9 | 1.8 | 1.7E-03 |
| NM_145886    | PIDD    | 9.1    | 5.0    | -0.9 | 1.8 | 5.0E-05 |
| NM_032294    | CAMKK1  | 6.3    | 3.5    | -0.9 | 1.8 | 5.0E-05 |
| NM_001128228 | TPRN    | 8.1    | 4.5    | -0.9 | 1.8 | 5.0E-05 |
| NM_001744    | CAMK4   | 1.8    | 1.0    | -0.9 | 1.8 | 5.0E-05 |
| NM_001008563 | USP20   | 4.9    | 2.7    | -0.9 | 1.8 | 5.0E-05 |
| NM_001199107 | TBC1D24 | 4.6    | 2.6    | -0.9 | 1.8 | 5.0E-05 |
| NM_001130144 | LTBP3   | 29.0   | 16.1   | -0.9 | 1.8 | 5.0E-05 |
| NM_173511    | FAM117B | 2.5    | 1.4    | -0.9 | 1.8 | 5.0E-05 |
| NM_002334    | LRP4    | 9.1    | 5.0    | -0.8 | 1.8 | 5.0E-05 |
| NM_001470    | GABBR1  | 10.8   | 6.0    | -0.8 | 1.8 | 5.0E-05 |
| NM_001080410 | FBXO41  | 4.2    | 2.4    | -0.8 | 1.8 | 5.0E-05 |
| NM_019116    | UBFD1   | 28.4   | 15.8   | -0.8 | 1.8 | 5.0E-05 |
| NM_006291    | TNFAIP2 | 20.9   | 11.6   | -0.8 | 1.8 | 5.0E-05 |
| NM_007183    | PKP3    | 3.6    | 2.0    | -0.8 | 1.8 | 5.0E-05 |
| NM_001122835 | TTC13   | 6.3    | 3.5    | -0.8 | 1.8 | 5.0E-05 |
| NM_198993    | STAC2   | 3.8    | 2.1    | -0.8 | 1.8 | 5.0E-05 |
| NM_001204298 | ZNF664  | 70.8   | 39.4   | -0.8 | 1.8 | 5.0E-05 |
| NM_001003    | RPLP1   | 1839.7 | 1024.7 | -0.8 | 1.8 | 5.0E-05 |
| NM_015720    | PODXL2  | 2.4    | 1.3    | -0.8 | 1.8 | 5.0E-05 |
| NM_002960    | S100A3  | 17.4   | 9.7    | -0.8 | 1.8 | 5.0E-05 |
| NM_023940    | RASL11B | 7.1    | 4.0    | -0.8 | 1.8 | 5.0E-05 |
| NM_001282708 | EXOSC2  | 26.8   | 15.0   | -0.8 | 1.8 | 5.0E-05 |
| NM_002518    | NPAS2   | 3.5    | 2.0    | -0.8 | 1.8 | 5.0E-05 |
| NM_001134336 | STRIP2  | 7.5    | 4.2    | -0.8 | 1.8 | 5.0E-05 |
| NM_001077498 | FAM222B | 12.2   | 6.8    | -0.8 | 1.8 | 5.0E-05 |
| NM_000853    | GSTT1   | 16.2   | 9.1    | -0.8 | 1.8 | 5.0E-05 |
| NM_001035223 | RGL3    | 2.8    | 1.6    | -0.8 | 1.8 | 5.0E-05 |
| NM_032552    | DAB2IP  | 9.8    | 5.5    | -0.8 | 1.8 | 5.0E-05 |

|              |          |       |       |      |     |         |
|--------------|----------|-------|-------|------|-----|---------|
| NM_000263    | NAGLU    | 12.6  | 7.0   | -0.8 | 1.8 | 5.0E-05 |
| NM_004091    | E2F2     | 3.4   | 1.9   | -0.8 | 1.8 | 5.0E-05 |
| NM_001197181 | TUBB3    | 97.9  | 54.8  | -0.8 | 1.8 | 5.0E-05 |
| NM_001606    | ABCA2    | 9.1   | 5.1   | -0.8 | 1.8 | 5.0E-05 |
| NM_004074    | COX8A    | 423.6 | 237.2 | -0.8 | 1.8 | 5.0E-05 |
| NM_145288    | ZNF296   | 2.3   | 1.3   | -0.8 | 1.8 | 5.0E-05 |
| NM_001136195 | TNPO2    | 34.9  | 19.5  | -0.8 | 1.8 | 5.0E-05 |
| NM_000081    | LYST     | 1.9   | 1.0   | -0.8 | 1.8 | 5.0E-05 |
| NM_001799    | CDK7     | 23.0  | 12.9  | -0.8 | 1.8 | 5.0E-05 |
| NM_001145159 | INTS9    | 6.6   | 3.7   | -0.8 | 1.8 | 5.0E-05 |
| NM_001197    | BIK      | 1.8   | 1.0   | -0.8 | 1.8 | 5.0E-05 |
| NM_031904    | FRMD8    | 24.7  | 13.9  | -0.8 | 1.8 | 5.0E-05 |
| NM_001081003 | COMMD5   | 23.6  | 13.2  | -0.8 | 1.8 | 5.0E-05 |
| NM_001135642 | INPP5K   | 8.0   | 4.5   | -0.8 | 1.8 | 5.0E-05 |
| NM_002528    | NTHL1    | 18.6  | 10.4  | -0.8 | 1.8 | 5.0E-05 |
| NM_018207    | TRIM62   | 5.1   | 2.8   | -0.8 | 1.8 | 5.0E-05 |
| NM_152892    | LRWD1    | 24.8  | 13.9  | -0.8 | 1.8 | 5.0E-05 |
| NM_025250    | TTYH3    | 73.3  | 41.2  | -0.8 | 1.8 | 5.0E-05 |
| NM_001134398 | VAV2     | 30.9  | 17.3  | -0.8 | 1.8 | 5.0E-05 |
| NM_001143836 | NOX4     | 2.5   | 1.4   | -0.8 | 1.8 | 5.0E-05 |
| NM_016640    | MRPS30   | 20.8  | 11.7  | -0.8 | 1.8 | 5.0E-05 |
| NM_006480    | RGS14    | 6.2   | 3.5   | -0.8 | 1.8 | 5.0E-05 |
| NM_001144951 | GLYCTK   | 3.9   | 2.2   | -0.8 | 1.8 | 5.0E-05 |
| NM_012463    | ATP6V0A2 | 9.5   | 5.3   | -0.8 | 1.8 | 5.0E-05 |
| NM_001130690 | PDE10A   | 8.3   | 4.7   | -0.8 | 1.8 | 5.0E-05 |
| NM_001195573 | DICER1   | 19.9  | 11.2  | -0.8 | 1.8 | 5.0E-05 |
| NM_001077494 | NFKB2    | 41.9  | 23.6  | -0.8 | 1.8 | 5.0E-05 |
| NM_001007527 | LMBRD2   | 3.9   | 2.2   | -0.8 | 1.8 | 5.0E-05 |
| NM_001010938 | TNK2     | 7.6   | 4.3   | -0.8 | 1.8 | 5.0E-05 |
| NM_023009    | MARCKSL1 | 126.3 | 71.3  | -0.8 | 1.8 | 5.0E-05 |
| NM_023935    | DDRK1    | 40.9  | 23.1  | -0.8 | 1.8 | 5.0E-05 |
| NM_017916    | PIH1D1   | 45.3  | 25.6  | -0.8 | 1.8 | 5.0E-05 |
| NM_001253875 | UXS1     | 51.6  | 29.2  | -0.8 | 1.8 | 5.0E-05 |
| NM_001551    | IGBP1    | 32.6  | 18.4  | -0.8 | 1.8 | 5.0E-05 |
| NM_001145044 | SLCO3A1  | 8.1   | 4.6   | -0.8 | 1.8 | 5.0E-05 |
| NM_000033    | ABCD1    | 5.2   | 2.9   | -0.8 | 1.8 | 1.4E-02 |
| NM_001128918 | MARK3    | 26.7  | 15.1  | -0.8 | 1.8 | 5.0E-05 |
| NM_018154    | ASF1B    | 85.5  | 48.4  | -0.8 | 1.8 | 5.0E-05 |
| NM_001127505 | ASAH1    | 29.8  | 16.9  | -0.8 | 1.8 | 5.0E-05 |
| NM_001033087 | MACROD2  | 5.9   | 3.4   | -0.8 | 1.8 | 5.0E-05 |
| NM_015395    | TECPR1   | 4.8   | 2.7   | -0.8 | 1.8 | 5.0E-05 |
| NM_024496    | IRF2BPL  | 12.7  | 7.2   | -0.8 | 1.8 | 5.0E-05 |
| NM_001289823 | FURIN    | 39.1  | 22.1  | -0.8 | 1.8 | 5.0E-05 |
| NM_001145670 | SORBS2   | 1.7   | 1.0   | -0.8 | 1.8 | 5.0E-05 |
| NM_001198978 | SMAP2    | 11.5  | 6.5   | -0.8 | 1.8 | 5.0E-05 |
| NM_024642    | GALNT12  | 6.8   | 3.9   | -0.8 | 1.8 | 5.0E-05 |
| NM_018036    | ATG2B    | 4.9   | 2.8   | -0.8 | 1.8 | 5.0E-05 |
| NM_003132    | SRM      | 94.8  | 53.8  | -0.8 | 1.8 | 5.0E-05 |
| NM_001271888 | CIB2     | 16.2  | 9.2   | -0.8 | 1.8 | 5.0E-05 |
| NM_024980    | GPR157   | 5.4   | 3.1   | -0.8 | 1.8 | 5.0E-05 |
| NM_001168299 | KLHL13   | 2.6   | 1.5   | -0.8 | 1.8 | 5.0E-05 |
| NM_004454    | ETV5     | 11.5  | 6.6   | -0.8 | 1.8 | 5.0E-05 |
| NM_003821    | RIPK2    | 8.3   | 4.7   | -0.8 | 1.8 | 5.0E-05 |
| NM_001002019 | PUS1     | 20.3  | 11.5  | -0.8 | 1.8 | 5.0E-05 |
| NR_033323    | NSUN5P2  | 6.4   | 3.6   | -0.8 | 1.8 | 5.5E-03 |
| NM_001105203 | RUSC1    | 34.0  | 19.3  | -0.8 | 1.8 | 5.0E-05 |
| NM_001003796 | NHP2L1   | 95.6  | 54.4  | -0.8 | 1.8 | 5.0E-05 |
| NM_001191060 | SLC25A22 | 12.2  | 6.9   | -0.8 | 1.8 | 5.0E-05 |
| NM_001077621 | VPS37D   | 1.9   | 1.1   | -0.8 | 1.8 | 5.0E-05 |
| NM_015016    | MAST3    | 5.2   | 3.0   | -0.8 | 1.8 | 5.0E-05 |
| NM_000017    | ACADS    | 8.3   | 4.7   | -0.8 | 1.8 | 5.0E-05 |

|              |            |        |        |      |     |         |
|--------------|------------|--------|--------|------|-----|---------|
| NM_005952    | MT1X       | 102.7  | 58.5   | -0.8 | 1.8 | 5.0E-05 |
| NM_001046    | SLC12A2    | 12.6   | 7.2    | -0.8 | 1.8 | 5.0E-05 |
| NM_006076    | AGFG2      | 6.4    | 3.6    | -0.8 | 1.8 | 5.0E-05 |
| NM_000331    | SAA1       | 1929.2 | 1099.4 | -0.8 | 1.8 | 5.0E-05 |
| NM_001043318 | ELMSAN1    | 13.9   | 7.9    | -0.8 | 1.8 | 5.0E-05 |
| NM_005675    | DGCR6      | 5.9    | 3.4    | -0.8 | 1.8 | 5.0E-05 |
| NM_002237    | KCNG1      | 9.6    | 5.5    | -0.8 | 1.8 | 5.0E-05 |
| NM_005560    | LAMA5      | 16.4   | 9.3    | -0.8 | 1.8 | 5.0E-05 |
| NM_001080415 | U2SURP     | 21.2   | 12.1   | -0.8 | 1.8 | 5.0E-05 |
| NM_001178133 | SUFU       | 8.0    | 4.6    | -0.8 | 1.8 | 5.0E-05 |
| NM_002230    | JUP        | 19.6   | 11.2   | -0.8 | 1.8 | 5.0E-05 |
| NM_001934    | DLX4       | 2.0    | 1.2    | -0.8 | 1.8 | 5.0E-05 |
| NM_001184974 | PACSN3     | 42.9   | 24.5   | -0.8 | 1.8 | 5.0E-05 |
| NM_001040107 | HVCN1      | 2.2    | 1.2    | -0.8 | 1.7 | 2.5E-03 |
| NM_003463    | PTP4A1     | 59.2   | 33.8   | -0.8 | 1.7 | 5.0E-05 |
| NM_001015052 | MPG        | 45.7   | 26.1   | -0.8 | 1.7 | 5.0E-05 |
| NM_024092    | TMEM109    | 65.6   | 37.5   | -0.8 | 1.7 | 5.0E-05 |
| NR_026551    | CA5BP1     | 8.2    | 4.7    | -0.8 | 1.7 | 5.0E-05 |
| NM_001142343 | CMKLR1     | 2.4    | 1.4    | -0.8 | 1.7 | 5.0E-05 |
| NM_001159286 | HDAC10     | 33.3   | 19.0   | -0.8 | 1.7 | 5.0E-05 |
| NM_017854    | TMEM160    | 77.1   | 44.1   | -0.8 | 1.7 | 5.0E-05 |
| NM_001096    | ACLY       | 167.7  | 96.1   | -0.8 | 1.7 | 5.0E-05 |
| NM_001164144 | CHAMP1     | 18.7   | 10.7   | -0.8 | 1.7 | 5.0E-05 |
| NM_001031737 | CCDC78     | 1.6    | 0.9    | -0.8 | 1.7 | 8.7E-03 |
| NM_005524    | HES1       | 13.9   | 8.0    | -0.8 | 1.7 | 5.0E-05 |
| NM_001396    | DYRK1A     | 17.8   | 10.2   | -0.8 | 1.7 | 5.0E-05 |
| NR_003193    | SNORD114-1 | 3.2    | 1.9    | -0.8 | 1.7 | 5.0E-05 |
| NM_004111    | FEN1       | 90.1   | 51.7   | -0.8 | 1.7 | 5.0E-05 |
| NM_004230    | S1PR2      | 2.9    | 1.7    | -0.8 | 1.7 | 5.0E-05 |
| NM_144772    | APOA1BP    | 64.2   | 36.8   | -0.8 | 1.7 | 5.0E-05 |
| NM_021254    | C21orf59   | 35.2   | 20.2   | -0.8 | 1.7 | 5.0E-05 |
| NR_015427    | LINC00094  | 8.5    | 4.9    | -0.8 | 1.7 | 5.0E-05 |
| NM_020437    | ASPHD2     | 4.4    | 2.5    | -0.8 | 1.7 | 5.0E-05 |
| NM_145296    | CADM4      | 47.2   | 27.1   | -0.8 | 1.7 | 5.0E-05 |
| NM_001178061 | SEMA6C     | 3.2    | 1.8    | -0.8 | 1.7 | 5.0E-05 |
| NM_018365    | MNS1       | 8.4    | 4.8    | -0.8 | 1.7 | 5.0E-05 |
| NM_001171087 | CLCN2      | 4.1    | 2.3    | -0.8 | 1.7 | 3.0E-04 |
| NM_020823    | TMEM181    | 27.0   | 15.5   | -0.8 | 1.7 | 5.0E-05 |
| NM_001173982 | CHST11     | 4.2    | 2.4    | -0.8 | 1.7 | 5.0E-05 |
| NM_012324    | MAPK8IP2   | 1.5    | 0.9    | -0.8 | 1.7 | 5.0E-05 |
| NM_001199173 | MLST8      | 24.3   | 14.0   | -0.8 | 1.7 | 5.0E-05 |
| NM_007254    | PNKP       | 15.7   | 9.0    | -0.8 | 1.7 | 1.6E-03 |
| NM_130783    | TSPAN18    | 5.6    | 3.2    | -0.8 | 1.7 | 5.0E-05 |
| NM_017646    | TRIT1      | 12.4   | 7.2    | -0.8 | 1.7 | 5.0E-05 |
| NM_030968    | C1QTNF1    | 11.3   | 6.5    | -0.8 | 1.7 | 5.0E-05 |
| NM_001080512 | BICC1      | 31.0   | 17.9   | -0.8 | 1.7 | 5.0E-05 |
| NM_145176    | SLC2A12    | 1.9    | 1.1    | -0.8 | 1.7 | 5.0E-05 |
| NM_001037339 | PDE4B      | 4.9    | 2.8    | -0.8 | 1.7 | 5.0E-05 |
| NM_001267723 | CCDC61     | 3.5    | 2.0    | -0.8 | 1.7 | 5.0E-05 |
| NM_004461    | FARSA      | 57.5   | 33.2   | -0.8 | 1.7 | 5.0E-05 |
| NM_023937    | MRPL34     | 32.8   | 18.9   | -0.8 | 1.7 | 5.0E-05 |
| NM_001277813 | YTHDF3     | 27.9   | 16.1   | -0.8 | 1.7 | 5.0E-05 |
| NM_004335    | BST2       | 32.5   | 18.7   | -0.8 | 1.7 | 5.0E-05 |
| NM_014053    | FLVCR1     | 4.7    | 2.7    | -0.8 | 1.7 | 5.0E-05 |
| NM_001282211 | NDRG2      | 6.6    | 3.8    | -0.8 | 1.7 | 6.9E-03 |
| NM_003331    | TYK2       | 25.4   | 14.7   | -0.8 | 1.7 | 5.0E-05 |
| NM_001884    | HAPLN1     | 1.8    | 1.0    | -0.8 | 1.7 | 5.0E-05 |
| NM_001252119 | PASK       | 10.4   | 6.0    | -0.8 | 1.7 | 5.0E-05 |
| NM_002381    | MATN3      | 26.2   | 15.2   | -0.8 | 1.7 | 5.0E-05 |
| NM_001242786 | BRF1       | 14.4   | 8.3    | -0.8 | 1.7 | 5.0E-05 |
| NM_022900    | CASD1      | 6.1    | 3.5    | -0.8 | 1.7 | 5.0E-05 |

|              |              |       |       |      |     |         |
|--------------|--------------|-------|-------|------|-----|---------|
| NM_032701    | SUV420H2     | 8.5   | 4.9   | -0.8 | 1.7 | 5.0E-05 |
| NM_001190328 | YJEFN3       | 357.5 | 206.8 | -0.8 | 1.7 | 5.0E-05 |
| NR_037631    | LOC100288911 | 4.9   | 2.8   | -0.8 | 1.7 | 5.0E-05 |
| NM_133373    | PLCD3        | 18.4  | 10.6  | -0.8 | 1.7 | 5.0E-05 |
| NM_003902    | FUBP1        | 45.7  | 26.4  | -0.8 | 1.7 | 5.0E-05 |
| NR_002786    | CIDCEP       | 10.7  | 6.2   | -0.8 | 1.7 | 1.8E-02 |
| NM_001102371 | FOXRED2      | 12.4  | 7.2   | -0.8 | 1.7 | 5.0E-05 |
| NM_001124758 | SPNS2        | 5.0   | 2.9   | -0.8 | 1.7 | 5.0E-05 |
| NM_015444    | TMEM158      | 4.5   | 2.6   | -0.8 | 1.7 | 5.0E-05 |
| NM_001145293 | NGLY1        | 11.5  | 6.6   | -0.8 | 1.7 | 5.0E-05 |
| NM_152592    | SYNE3        | 1.5   | 0.9   | -0.8 | 1.7 | 5.0E-05 |
| NM_001107    | ACYP1        | 25.2  | 14.6  | -0.8 | 1.7 | 5.0E-05 |
| NM_002628    | PFN2         | 107.8 | 62.6  | -0.8 | 1.7 | 5.0E-05 |
| NR_038357    | ZSWIM8-AS1   | 6.6   | 3.8   | -0.8 | 1.7 | 1.5E-02 |
| NM_178507    | OAF          | 14.6  | 8.5   | -0.8 | 1.7 | 5.0E-05 |
| NM_016310    | POLR3K       | 45.2  | 26.3  | -0.8 | 1.7 | 5.0E-05 |
| NM_005868    | BET1         | 8.8   | 5.1   | -0.8 | 1.7 | 5.0E-05 |
| NM_001005340 | GPNMB        | 2.4   | 1.4   | -0.8 | 1.7 | 5.0E-05 |
| NM_001286526 | BCL7C        | 40.8  | 23.7  | -0.8 | 1.7 | 5.0E-05 |
| NM_002221    | ITPKB        | 2.4   | 1.4   | -0.8 | 1.7 | 5.0E-05 |
| NM_001127392 | MYRF         | 16.8  | 9.8   | -0.8 | 1.7 | 5.0E-05 |
| NM_024589    | ROGDI        | 17.9  | 10.4  | -0.8 | 1.7 | 5.0E-05 |
| NM_004052    | BNIP3        | 150.3 | 87.5  | -0.8 | 1.7 | 5.0E-05 |
| NM_001201372 | CCDC136      | 2.3   | 1.3   | -0.8 | 1.7 | 5.0E-05 |
| NM_005809    | PRDX2        | 136.9 | 79.7  | -0.8 | 1.7 | 5.0E-05 |
| NM_004739    | MTA2         | 63.8  | 37.2  | -0.8 | 1.7 | 5.0E-05 |
| NM_000309    | PPOX         | 6.5   | 3.8   | -0.8 | 1.7 | 1.5E-04 |
| NM_001136050 | DHRS1        | 16.0  | 9.4   | -0.8 | 1.7 | 2.5E-04 |
| NM_183376    | ARRDC4       | 15.6  | 9.1   | -0.8 | 1.7 | 5.0E-05 |
| NM_001173484 | NEBL         | 3.2   | 1.9   | -0.8 | 1.7 | 5.0E-05 |
| NM_000282    | PCCA         | 4.6   | 2.7   | -0.8 | 1.7 | 5.0E-05 |
| NM_001031681 | CTNS         | 5.9   | 3.4   | -0.8 | 1.7 | 1.2E-03 |
| NR_102400    | C16orf98     | 6.7   | 3.9   | -0.8 | 1.7 | 5.0E-05 |
| NM_018945    | PDE7B        | 3.4   | 2.0   | -0.8 | 1.7 | 5.0E-05 |
| NM_178026    | GGT7         | 20.6  | 12.0  | -0.8 | 1.7 | 5.0E-05 |
| NM_138444    | KCTD12       | 3.3   | 1.9   | -0.8 | 1.7 | 5.0E-05 |
| NM_018166    | EVA1B        | 22.4  | 13.1  | -0.8 | 1.7 | 5.0E-05 |
| NM_178537    | B4GALNT4     | 7.0   | 4.1   | -0.8 | 1.7 | 5.0E-05 |
| NM_003155    | STC1         | 7.6   | 4.5   | -0.8 | 1.7 | 5.0E-05 |
| NM_001111307 | PDE4A        | 6.7   | 3.9   | -0.8 | 1.7 | 6.0E-03 |
| NM_001282925 | ABI2         | 19.1  | 11.2  | -0.8 | 1.7 | 5.0E-05 |
| NM_199242    | UNC13D       | 2.0   | 1.2   | -0.8 | 1.7 | 5.0E-05 |
| NM_001144925 | MX1          | 14.7  | 8.6   | -0.8 | 1.7 | 5.0E-05 |
| NM_001178111 | SCAMP5       | 11.6  | 6.8   | -0.8 | 1.7 | 5.0E-05 |
| NM_018364    | RSBN1        | 3.0   | 1.8   | -0.8 | 1.7 | 5.0E-05 |
| NM_002994    | CXCL5        | 71.2  | 41.7  | -0.8 | 1.7 | 5.0E-05 |
| NM_017931    | TTC38        | 12.3  | 7.2   | -0.8 | 1.7 | 5.0E-05 |
| NM_178868    | CMTM8        | 2.8   | 1.7   | -0.8 | 1.7 | 5.0E-05 |
| NM_001105538 | MYBBP1A      | 24.3  | 14.2  | -0.8 | 1.7 | 5.0E-05 |
| NM_133489    | SLC26A10     | 1.7   | 1.0   | -0.8 | 1.7 | 5.0E-05 |
| NM_001040876 | ABCE1        | 39.4  | 23.1  | -0.8 | 1.7 | 5.0E-05 |
| NM_003211    | TDG          | 12.5  | 7.3   | -0.8 | 1.7 | 5.0E-05 |
| NM_001256584 | GYPC         | 15.7  | 9.2   | -0.8 | 1.7 | 5.0E-05 |
| NM_030949    | PPP1R14C     | 24.4  | 14.3  | -0.8 | 1.7 | 5.0E-05 |
| NM_022337    | RAB38        | 2.4   | 1.4   | -0.8 | 1.7 | 5.0E-05 |
| NM_018327    | SPTLC3       | 2.3   | 1.4   | -0.8 | 1.7 | 5.0E-05 |
| NM_001037    | SCN1B        | 21.7  | 12.7  | -0.8 | 1.7 | 5.0E-05 |
| NM_001099337 | COQ10A       | 8.2   | 4.8   | -0.8 | 1.7 | 5.0E-05 |
| NM_014807    | C2CD2L       | 4.6   | 2.7   | -0.8 | 1.7 | 3.0E-03 |
| NR_033266    | WASH5P       | 17.0  | 10.0  | -0.8 | 1.7 | 5.0E-05 |
| NM_001002264 | EPST11       | 4.9   | 2.9   | -0.8 | 1.7 | 5.0E-05 |

|              |              |       |       |      |     |         |
|--------------|--------------|-------|-------|------|-----|---------|
| NM_000548    | TSC2         | 16.5  | 9.7   | -0.8 | 1.7 | 5.0E-05 |
| NM_001039355 | SLC25A29     | 25.7  | 15.1  | -0.8 | 1.7 | 5.0E-05 |
| NM_001130698 | TRPC3        | 1.6   | 0.9   | -0.8 | 1.7 | 5.0E-05 |
| NM_152556    | C7orf60      | 5.0   | 3.0   | -0.8 | 1.7 | 5.0E-05 |
| NM_004116    | FKBP1B       | 15.1  | 8.9   | -0.8 | 1.7 | 5.0E-05 |
| NM_004184    | WARS         | 46.9  | 27.6  | -0.8 | 1.7 | 5.0E-05 |
| NM_016037    | UTP11L       | 23.7  | 14.0  | -0.8 | 1.7 | 5.0E-05 |
| NM_021922    | FANCE        | 5.5   | 3.2   | -0.8 | 1.7 | 5.0E-05 |
| NM_001126105 | SLC7A7       | 9.6   | 5.7   | -0.8 | 1.7 | 5.0E-05 |
| NM_001268    | RCBTB2       | 5.4   | 3.2   | -0.8 | 1.7 | 5.0E-05 |
| NM_005934    | MLLT1        | 21.3  | 12.5  | -0.8 | 1.7 | 5.0E-05 |
| NM_145798    | OSBPL7       | 5.2   | 3.1   | -0.8 | 1.7 | 5.0E-05 |
| NM_001287045 | SH3GLB2      | 19.9  | 11.7  | -0.8 | 1.7 | 1.5E-04 |
| NM_001171968 | CDHR5        | 4.5   | 2.6   | -0.8 | 1.7 | 1.4E-02 |
| NM_021008    | DEAF1        | 12.2  | 7.2   | -0.8 | 1.7 | 8.0E-04 |
| NM_031439    | SOX7         | 1.5   | 0.9   | -0.8 | 1.7 | 5.0E-05 |
| NM_001206389 | FGF8         | 43.8  | 25.8  | -0.8 | 1.7 | 5.0E-05 |
| NM_020962    | IGDCC4       | 1.6   | 1.0   | -0.8 | 1.7 | 5.0E-05 |
| NM_173570    | ZDHHC23      | 2.4   | 1.4   | -0.8 | 1.7 | 5.0E-05 |
| NM_007144    | PCGF2        | 19.8  | 11.7  | -0.8 | 1.7 | 5.0E-05 |
| NM_016937    | POLA1        | 11.5  | 6.8   | -0.8 | 1.7 | 5.0E-05 |
| NM_002730    | PRKACA       | 75.9  | 44.8  | -0.8 | 1.7 | 5.0E-05 |
| NM_002800    | PSMB9        | 53.8  | 31.8  | -0.8 | 1.7 | 5.0E-05 |
| NM_000177    | GSN          | 51.1  | 30.2  | -0.8 | 1.7 | 5.0E-05 |
| NM_172069    | PLEKHH2      | 2.3   | 1.4   | -0.8 | 1.7 | 5.0E-05 |
| NM_001168399 | BEX2         | 3.2   | 1.9   | -0.8 | 1.7 | 5.0E-05 |
| NM_000041    | APOE         | 191.0 | 113.0 | -0.8 | 1.7 | 5.0E-05 |
| NM_001008709 | PPP1CA       | 155.8 | 92.3  | -0.8 | 1.7 | 5.0E-05 |
| NM_001145211 | SLCO2B1      | 5.4   | 3.2   | -0.8 | 1.7 | 5.0E-05 |
| NM_024407    | NDUFS7       | 89.3  | 52.9  | -0.8 | 1.7 | 5.0E-05 |
| NM_001195736 | FAM213B      | 20.8  | 12.3  | -0.8 | 1.7 | 5.0E-05 |
| NM_000155    | GALT         | 14.3  | 8.5   | -0.8 | 1.7 | 5.0E-05 |
| NM_004317    | ASNA1        | 106.0 | 62.8  | -0.8 | 1.7 | 5.0E-05 |
| NM_014598    | SOCS7        | 5.5   | 3.3   | -0.8 | 1.7 | 5.0E-05 |
| NM_004651    | USP11        | 33.2  | 19.7  | -0.8 | 1.7 | 5.0E-05 |
| NM_024654    | NOL9         | 9.7   | 5.8   | -0.8 | 1.7 | 5.0E-05 |
| NM_003689    | AKR7A2       | 29.6  | 17.5  | -0.8 | 1.7 | 5.0E-05 |
| NM_153232    | EID2         | 11.4  | 6.8   | -0.8 | 1.7 | 5.0E-05 |
| NM_001288950 | ASTE1        | 3.6   | 2.1   | -0.8 | 1.7 | 2.0E-02 |
| NM_001012508 | SPRN         | 3.0   | 1.8   | -0.8 | 1.7 | 3.5E-04 |
| NM_003952    | RPS6KB2      | 26.8  | 15.9  | -0.8 | 1.7 | 5.0E-05 |
| NM_001253725 | KREMEN2      | 18.5  | 11.0  | -0.8 | 1.7 | 5.0E-05 |
| NM_182975    | ZNF326       | 23.4  | 13.9  | -0.8 | 1.7 | 5.0E-05 |
| NM_001204366 | MGST2        | 17.0  | 10.1  | -0.7 | 1.7 | 5.0E-05 |
| NM_024539    | RNF128       | 3.1   | 1.8   | -0.7 | 1.7 | 5.0E-05 |
| NM_000202    | IDS          | 27.0  | 16.1  | -0.7 | 1.7 | 5.0E-05 |
| NM_001017420 | ESCO2        | 13.1  | 7.8   | -0.7 | 1.7 | 5.0E-05 |
| NM_001003801 | SMARCD3      | 15.9  | 9.5   | -0.7 | 1.7 | 5.5E-04 |
| NM_001361    | DHODH        | 6.3   | 3.8   | -0.7 | 1.7 | 5.0E-05 |
| NM_012193    | FZD4         | 2.9   | 1.7   | -0.7 | 1.7 | 5.0E-05 |
| NM_001282852 | CCNY         | 23.4  | 14.0  | -0.7 | 1.7 | 5.0E-05 |
| NM_152486    | SAMD11       | 20.9  | 12.4  | -0.7 | 1.7 | 1.0E-04 |
| NM_001007237 | IGSF3        | 7.0   | 4.2   | -0.7 | 1.7 | 5.0E-05 |
| NM_004040    | RHOB         | 96.5  | 57.5  | -0.7 | 1.7 | 5.0E-05 |
| NM_001168241 | GAREML       | 6.2   | 3.7   | -0.7 | 1.7 | 5.0E-05 |
| NM_006801    | KDEL1R1      | 124.6 | 74.3  | -0.7 | 1.7 | 5.0E-05 |
| NM_001195001 | PTPRU        | 15.9  | 9.5   | -0.7 | 1.7 | 5.0E-05 |
| NM_015871    | ZNF593       | 45.7  | 27.3  | -0.7 | 1.7 | 5.0E-05 |
| NM_001251845 | TRPC1        | 6.5   | 3.9   | -0.7 | 1.7 | 5.0E-05 |
| NR_038396    | LOC100506469 | 2.1   | 1.2   | -0.7 | 1.7 | 9.7E-03 |
| NM_000320    | QDPR         | 27.7  | 16.5  | -0.7 | 1.7 | 5.0E-05 |

|              |                   |       |       |      |     |         |
|--------------|-------------------|-------|-------|------|-----|---------|
| NM_001114135 | DMTN              | 8.5   | 5.1   | -0.7 | 1.7 | 5.0E-05 |
| NM_005324    | H3F3AH3F3AP4H3F3B | 252.9 | 151.2 | -0.7 | 1.7 | 5.0E-05 |
| NM_030973    | MED25             | 22.1  | 13.2  | -0.7 | 1.7 | 5.0E-05 |
| NM_001145031 | PLAU              | 51.8  | 31.0  | -0.7 | 1.7 | 5.0E-05 |
| NM_032557    | USP38             | 8.9   | 5.3   | -0.7 | 1.7 | 5.0E-05 |
| NM_001144884 | SLC30A7           | 6.8   | 4.0   | -0.7 | 1.7 | 5.0E-05 |
| NM_015059    | TLN2              | 4.8   | 2.9   | -0.7 | 1.7 | 5.0E-05 |
| NM_000716    | C4BPB             | 5.4   | 3.3   | -0.7 | 1.7 | 5.0E-05 |
| NM_138798    | MITD1             | 28.4  | 17.0  | -0.7 | 1.7 | 2.0E-04 |
| NM_006822    | RAB40B            | 8.0   | 4.8   | -0.7 | 1.7 | 5.0E-05 |
| NM_198465    | NRK               | 8.0   | 4.8   | -0.7 | 1.7 | 5.0E-05 |
| NM_013335    | GMPPA             | 20.1  | 12.1  | -0.7 | 1.7 | 5.0E-05 |
| NM_016010    | ZC2HC1A           | 4.9   | 2.9   | -0.7 | 1.7 | 1.0E-04 |
| NM_018051    | WDR60             | 6.3   | 3.8   | -0.7 | 1.7 | 5.0E-05 |
| NM_033315    | RASL10B           | 3.1   | 1.8   | -0.7 | 1.7 | 5.0E-05 |
| NM_000264    | PTCH1             | 2.1   | 1.2   | -0.7 | 1.7 | 5.0E-05 |
| NM_014240    | LIMD1             | 6.0   | 3.6   | -0.7 | 1.7 | 5.0E-05 |
| NM_017955    | CDCA4             | 25.4  | 15.2  | -0.7 | 1.7 | 5.0E-05 |
| NM_001134340 | PSMG3             | 43.9  | 26.3  | -0.7 | 1.7 | 5.0E-05 |
| NM_013451    | MYOF              | 28.4  | 17.1  | -0.7 | 1.7 | 5.0E-05 |
| NM_016932    | SIX2              | 1.7   | 1.0   | -0.7 | 1.7 | 5.0E-05 |
| NM_001145018 | CCDC153           | 1.6   | 0.9   | -0.7 | 1.7 | 1.1E-03 |
| NM_001004419 | CLEC2D            | 4.1   | 2.5   | -0.7 | 1.7 | 5.0E-05 |
| NM_001039803 | CDK20             | 3.7   | 2.2   | -0.7 | 1.7 | 5.0E-05 |
| NM_012420    | IFIT5             | 5.0   | 3.0   | -0.7 | 1.7 | 5.0E-05 |
| NM_052846    | EMILIN3           | 4.0   | 2.4   | -0.7 | 1.7 | 5.0E-05 |
| NM_016529    | ATP8A2            | 2.8   | 1.7   | -0.7 | 1.7 | 5.0E-05 |
| NM_001124756 | PABPC1L           | 19.4  | 11.7  | -0.7 | 1.7 | 5.0E-05 |
| NM_001127213 | LY6E              | 197.2 | 118.9 | -0.7 | 1.7 | 5.0E-05 |
| NM_001037172 | ACPL2             | 6.3   | 3.8   | -0.7 | 1.7 | 5.0E-05 |
| NM_001085375 | C1orf226          | 1.5   | 0.9   | -0.7 | 1.7 | 5.0E-05 |
| NM_001080453 | INTS1             | 24.8  | 15.0  | -0.7 | 1.7 | 5.0E-05 |
| NM_001142503 | STARD8            | 2.7   | 1.7   | -0.7 | 1.7 | 5.0E-05 |
| NM_002198    | IRF1              | 15.6  | 9.4   | -0.7 | 1.7 | 5.0E-05 |
| NM_015419    | MXRA5             | 8.5   | 5.1   | -0.7 | 1.7 | 5.0E-05 |
| NM_198722    | AMIGO3            | 6.7   | 4.1   | -0.7 | 1.7 | 6.6E-03 |
| NM_001204255 | SCARB2            | 39.5  | 23.8  | -0.7 | 1.7 | 5.0E-05 |
| NM_001002251 | ARL6IP4           | 123.3 | 74.5  | -0.7 | 1.7 | 5.0E-05 |
| NM_001271006 | STRA13            | 52.2  | 31.5  | -0.7 | 1.7 | 5.0E-05 |
| NM_001282450 | ESRRA             | 15.5  | 9.4   | -0.7 | 1.7 | 1.8E-03 |
| NM_015448    | DPCD              | 27.2  | 16.4  | -0.7 | 1.7 | 5.0E-05 |
| NM_015289    | VPS39             | 14.7  | 8.9   | -0.7 | 1.7 | 5.0E-05 |
| NM_001145416 | TMEM205           | 80.7  | 48.8  | -0.7 | 1.7 | 5.0E-05 |
| NM_001145319 | PLS1              | 6.6   | 4.0   | -0.7 | 1.7 | 5.0E-05 |
| NM_001084    | PLOD3             | 43.9  | 26.6  | -0.7 | 1.7 | 5.0E-05 |
| NM_004594    | SLC9A5            | 2.9   | 1.8   | -0.7 | 1.7 | 5.0E-05 |
| NM_001039577 | CCNL2             | 38.8  | 23.5  | -0.7 | 1.7 | 5.0E-05 |
| NM_001040280 | CD83              | 4.6   | 2.8   | -0.7 | 1.7 | 5.0E-05 |
| NM_001014797 | KCNMA1            | 9.8   | 6.0   | -0.7 | 1.7 | 5.0E-05 |
| NM_182540    | DDX26B            | 3.8   | 2.3   | -0.7 | 1.7 | 5.0E-05 |
| NM_001253900 | MEST              | 59.3  | 35.9  | -0.7 | 1.7 | 5.0E-05 |
| NM_001030272 | ARNTL             | 5.5   | 3.3   | -0.7 | 1.7 | 5.0E-05 |
| NM_001282474 | AP1G2             | 19.6  | 11.9  | -0.7 | 1.7 | 5.0E-05 |
| NM_017670    | OTUB1             | 57.1  | 34.6  | -0.7 | 1.6 | 5.0E-05 |
| NM_021946    | BCORL1            | 6.7   | 4.1   | -0.7 | 1.6 | 5.0E-05 |
| NM_001128827 | DLG4              | 8.6   | 5.2   | -0.7 | 1.6 | 4.1E-03 |
| NM_001114632 | JMJD7             | 6.6   | 4.0   | -0.7 | 1.6 | 5.0E-05 |
| NM_001278529 | ARHGEF40          | 22.4  | 13.6  | -0.7 | 1.6 | 5.0E-05 |
| NM_138368    | AP5B1             | 4.9   | 3.0   | -0.7 | 1.6 | 5.0E-05 |
| NM_014161    | MRPL18            | 62.4  | 37.8  | -0.7 | 1.6 | 5.0E-05 |
| NM_001127496 | SPRY4             | 10.0  | 6.1   | -0.7 | 1.6 | 5.0E-05 |

|              |           |        |       |      |     |         |
|--------------|-----------|--------|-------|------|-----|---------|
| NM_031908    | C1QTNF2   | 2.8    | 1.7   | -0.7 | 1.6 | 5.0E-05 |
| NM_000325    | PITX2     | 38.0   | 23.1  | -0.7 | 1.6 | 5.0E-05 |
| NM_006739    | MCM5      | 58.2   | 35.3  | -0.7 | 1.6 | 5.0E-05 |
| NM_001167942 | TNFAIP8L1 | 6.4    | 3.9   | -0.7 | 1.6 | 5.0E-05 |
| NM_006064    | RRAGB     | 5.2    | 3.2   | -0.7 | 1.6 | 5.0E-05 |
| NM_001080432 | FTO       | 14.6   | 8.9   | -0.7 | 1.6 | 5.0E-05 |
| NM_001034194 | EXOSC9    | 52.8   | 32.1  | -0.7 | 1.6 | 5.0E-05 |
| NM_001282941 | RTKN2     | 2.7    | 1.6   | -0.7 | 1.6 | 5.8E-03 |
| NM_080738    | EDARADD   | 3.4    | 2.0   | -0.7 | 1.6 | 5.0E-05 |
| NM_032777    | GPR124    | 7.5    | 4.6   | -0.7 | 1.6 | 5.0E-05 |
| NM_032193    | RNASEH2C  | 14.8   | 9.0   | -0.7 | 1.6 | 5.0E-05 |
| NM_001188    | BAK1      | 30.1   | 18.3  | -0.7 | 1.6 | 5.0E-05 |
| NM_001271803 | REEP2     | 9.7    | 5.9   | -0.7 | 1.6 | 5.0E-05 |
| NM_001017526 | ARHGAP8   | 19.1   | 11.6  | -0.7 | 1.6 | 5.0E-05 |
| NM_138410    | CMTM7     | 17.6   | 10.7  | -0.7 | 1.6 | 5.0E-05 |
| NM_001256864 | DNAJC6    | 2.3    | 1.4   | -0.7 | 1.6 | 5.0E-05 |
| NM_006264    | PTPN13    | 8.2    | 5.0   | -0.7 | 1.6 | 5.0E-05 |
| NM_001258288 | SELENBP1  | 12.6   | 7.7   | -0.7 | 1.6 | 5.0E-05 |
| NM_003054    | SLC18A2   | 2.3    | 1.4   | -0.7 | 1.6 | 7.1E-03 |
| NM_001256099 | CTHRC1    | 47.2   | 28.8  | -0.7 | 1.6 | 5.0E-05 |
| NM_021237    | SELK      | 42.4   | 25.8  | -0.7 | 1.6 | 5.0E-05 |
| NM_003320    | TUB       | 3.5    | 2.1   | -0.7 | 1.6 | 5.0E-05 |
| NM_001098482 | CRTC1     | 8.3    | 5.0   | -0.7 | 1.6 | 1.6E-03 |
| NM_021627    | SENP2     | 17.2   | 10.5  | -0.7 | 1.6 | 5.0E-05 |
| NM_001278233 | LMCD1     | 73.3   | 44.7  | -0.7 | 1.6 | 5.0E-05 |
| NM_016463    | CXXC5     | 2.2    | 1.4   | -0.7 | 1.6 | 7.9E-03 |
| NM_025090    | USP36     | 12.9   | 7.9   | -0.7 | 1.6 | 5.0E-05 |
| NM_001276468 | B4GALNT1  | 6.9    | 4.2   | -0.7 | 1.6 | 5.0E-05 |
| NM_001039583 | PICK1     | 13.9   | 8.5   | -0.7 | 1.6 | 5.0E-05 |
| NM_001177355 | MSLN      | 7.5    | 4.6   | -0.7 | 1.6 | 5.0E-05 |
| NM_001039457 | ATP6V0B   | 109.4  | 66.9  | -0.7 | 1.6 | 5.0E-05 |
| NR_033947    | LIMD1-AS1 | 6.4    | 3.9   | -0.7 | 1.6 | 1.0E-04 |
| NM_020846    | SLAIN2    | 9.5    | 5.8   | -0.7 | 1.6 | 5.0E-05 |
| NM_015144    | ZCCHC14   | 6.1    | 3.8   | -0.7 | 1.6 | 5.0E-05 |
| NM_001252406 | ZBTB7B    | 8.5    | 5.2   | -0.7 | 1.6 | 5.0E-05 |
| NM_001012    | RPS8      | 1401.1 | 858.7 | -0.7 | 1.6 | 5.0E-05 |
| NM_001012761 | RGMB      | 7.0    | 4.3   | -0.7 | 1.6 | 5.0E-05 |
| NM_001134231 | NT5DC2    | 2.7    | 1.7   | -0.7 | 1.6 | 4.3E-03 |
| NM_002131    | HMGA1     | 92.4   | 56.7  | -0.7 | 1.6 | 5.0E-05 |
| NM_033260    | FOXQ1     | 3.0    | 1.9   | -0.7 | 1.6 | 5.0E-05 |
| NM_023078    | PYCR1     | 7.5    | 4.6   | -0.7 | 1.6 | 5.0E-05 |
| NM_000828    | GRIA3     | 2.6    | 1.6   | -0.7 | 1.6 | 2.0E-04 |
| NM_001077446 | TSEN34    | 29.3   | 18.0  | -0.7 | 1.6 | 5.0E-05 |
| NM_001130079 | MOV10     | 31.6   | 19.4  | -0.7 | 1.6 | 5.0E-05 |
| NM_005763    | AASS      | 3.1    | 1.9   | -0.7 | 1.6 | 5.0E-05 |
| NM_001082486 | ACD       | 13.5   | 8.3   | -0.7 | 1.6 | 5.0E-05 |
| NM_001012643 | MYPOP     | 4.0    | 2.5   | -0.7 | 1.6 | 5.0E-05 |
| NM_001079528 | ABCC6     | 3.2    | 1.9   | -0.7 | 1.6 | 5.0E-05 |
| NM_014365    | HSPB8     | 16.4   | 10.1  | -0.7 | 1.6 | 5.0E-05 |
| NM_006467    | POLR3G    | 10.0   | 6.2   | -0.7 | 1.6 | 1.1E-02 |
| NM_001014765 | FBXO44    | 7.7    | 4.7   | -0.7 | 1.6 | 5.0E-05 |
| NM_001206942 | CSPG5     | 1.8    | 1.1   | -0.7 | 1.6 | 5.0E-05 |
| NM_001168320 | TSPAN9    | 25.1   | 15.4  | -0.7 | 1.6 | 5.0E-05 |
| NM_005481    | MED16     | 27.9   | 17.2  | -0.7 | 1.6 | 5.0E-05 |
| NM_001252402 | TMEM249   | 12.8   | 7.9   | -0.7 | 1.6 | 2.5E-04 |
| NM_005218    | DEFB1     | 2.8    | 1.7   | -0.7 | 1.6 | 4.4E-03 |
| NM_001203244 | SEMA4G    | 1.9    | 1.1   | -0.7 | 1.6 | 6.2E-03 |
| NM_006821    | ACOT2     | 12.3   | 7.6   | -0.7 | 1.6 | 5.0E-05 |
| NM_021129    | PPA1      | 134.4  | 82.9  | -0.7 | 1.6 | 5.0E-05 |
| NM_001281425 | DCTN3     | 79.3   | 48.9  | -0.7 | 1.6 | 5.0E-05 |
| NM_001080480 | MBOAT1    | 5.2    | 3.2   | -0.7 | 1.6 | 5.0E-05 |

|              |           |       |       |      |     |         |
|--------------|-----------|-------|-------|------|-----|---------|
| NR_002795    | HOXA11-AS | 5.2   | 3.2   | -0.7 | 1.6 | 5.0E-05 |
| NM_145173    | DIRAS1    | 3.1   | 1.9   | -0.7 | 1.6 | 5.0E-05 |
| NM_002136    | HNRNPA1   | 699.4 | 431.5 | -0.7 | 1.6 | 5.0E-05 |
| NM_002015    | FOXO1     | 15.4  | 9.5   | -0.7 | 1.6 | 5.0E-05 |
| NM_002690    | POLB      | 13.4  | 8.2   | -0.7 | 1.6 | 5.0E-05 |
| NM_152914    | C17orf103 | 6.1   | 3.7   | -0.7 | 1.6 | 5.0E-05 |
| NM_001142776 | CHAC1     | 5.6   | 3.5   | -0.7 | 1.6 | 5.0E-05 |
| NM_005257    | GATA6     | 4.6   | 2.8   | -0.7 | 1.6 | 5.0E-05 |
| NM_001202    | BMP4      | 3.7   | 2.3   | -0.7 | 1.6 | 5.0E-05 |
| NM_015305    | ANGEL1    | 10.1  | 6.3   | -0.7 | 1.6 | 5.0E-05 |
| NM_001221    | CAMK2D    | 8.5   | 5.2   | -0.7 | 1.6 | 5.0E-05 |
| NM_001122671 | CCBL1     | 17.5  | 10.8  | -0.7 | 1.6 | 5.0E-05 |
| NM_006887    | ZFP36L2   | 21.1  | 13.1  | -0.7 | 1.6 | 5.0E-05 |
| NM_015617    | PYGO1     | 2.9   | 1.8   | -0.7 | 1.6 | 5.0E-05 |
| NM_001118890 | GLRX      | 32.5  | 20.1  | -0.7 | 1.6 | 5.0E-05 |
| NM_000920    | PC        | 8.8   | 5.5   | -0.7 | 1.6 | 5.0E-05 |
| NM_001185012 | NDUFA2    | 166.9 | 103.3 | -0.7 | 1.6 | 5.0E-05 |
| NM_012458    | TIMM13    | 95.1  | 58.9  | -0.7 | 1.6 | 5.0E-05 |
| NM_013438    | UBQLN1    | 52.2  | 32.3  | -0.7 | 1.6 | 5.0E-05 |
| NM_013337    | TIMM22    | 25.6  | 15.9  | -0.7 | 1.6 | 5.0E-05 |
| NM_133259    | LRPPRC    | 27.4  | 17.0  | -0.7 | 1.6 | 5.0E-05 |
| NM_052831    | SLC18B1   | 6.0   | 3.7   | -0.7 | 1.6 | 5.0E-05 |
| NM_016048    | ISOC1     | 23.2  | 14.4  | -0.7 | 1.6 | 5.0E-05 |
| NM_001199280 | HAS3      | 5.7   | 3.5   | -0.7 | 1.6 | 1.7E-02 |
| NM_001014831 | PAK4      | 19.3  | 12.0  | -0.7 | 1.6 | 5.0E-05 |
| NM_002616    | PER1      | 17.2  | 10.7  | -0.7 | 1.6 | 5.0E-05 |
| NM_000874    | IFNAR2    | 17.4  | 10.8  | -0.7 | 1.6 | 5.0E-05 |
| NM_001079675 | ETV4      | 7.2   | 4.5   | -0.7 | 1.6 | 5.0E-05 |
| NR_003584    | SNHG8     | 28.4  | 17.7  | -0.7 | 1.6 | 5.0E-05 |
| NM_001080431 | SLC45A4   | 2.8   | 1.8   | -0.7 | 1.6 | 5.0E-05 |
| NM_001042573 | ENGASE    | 5.6   | 3.5   | -0.7 | 1.6 | 5.0E-05 |
| NM_138440    | VASN      | 29.2  | 18.2  | -0.7 | 1.6 | 5.0E-05 |
| NM_001408    | CELSR2    | 9.9   | 6.2   | -0.7 | 1.6 | 5.0E-05 |
| NM_001100418 | C19orf60  | 23.6  | 14.7  | -0.7 | 1.6 | 5.0E-05 |
| NM_001135954 | UCK1      | 20.6  | 12.8  | -0.7 | 1.6 | 5.0E-05 |
| NM_032390    | MKI67IP   | 36.2  | 22.6  | -0.7 | 1.6 | 5.0E-05 |
| NM_002917    | RFNG      | 13.4  | 8.4   | -0.7 | 1.6 | 8.5E-04 |
| NM_001166102 | NDUFV1    | 84.5  | 52.7  | -0.7 | 1.6 | 5.0E-05 |
| NM_014337    | PPIL2     | 14.5  | 9.1   | -0.7 | 1.6 | 5.0E-05 |
| NM_033517    | SHANK3    | 3.4   | 2.1   | -0.7 | 1.6 | 5.0E-05 |
| NM_004135    | IDH3G     | 46.2  | 28.8  | -0.7 | 1.6 | 5.0E-05 |
| NM_004104    | FASN      | 50.9  | 31.8  | -0.7 | 1.6 | 5.0E-05 |
| NM_019613    | WDR45B    | 49.9  | 31.2  | -0.7 | 1.6 | 5.0E-05 |
| NM_001100873 | C16orf46  | 2.3   | 1.4   | -0.7 | 1.6 | 2.5E-04 |
| NM_001129979 | SYCE1L    | 10.7  | 6.7   | -0.7 | 1.6 | 5.0E-05 |
| NM_014061    | MAGEH1    | 10.0  | 6.3   | -0.7 | 1.6 | 5.0E-05 |
| NM_001012301 | ARSI      | 23.8  | 14.9  | -0.7 | 1.6 | 5.0E-05 |
| NM_001009941 | ANKRD16   | 4.2   | 2.6   | -0.7 | 1.6 | 2.4E-02 |
| NM_024315    | TMEM243   | 17.2  | 10.8  | -0.7 | 1.6 | 2.0E-04 |
| NM_001287060 | RABGEF1   | 18.6  | 11.7  | -0.7 | 1.6 | 5.0E-05 |
| NM_004069    | AP2S1     | 227.7 | 142.3 | -0.7 | 1.6 | 5.0E-05 |
| NM_001025366 | VEGFA     | 19.7  | 12.3  | -0.7 | 1.6 | 5.0E-05 |
| NM_001325    | CSTF2     | 22.2  | 13.9  | -0.7 | 1.6 | 5.0E-05 |
| NM_002089    | CXCL2     | 5.5   | 3.4   | -0.7 | 1.6 | 5.0E-05 |
| NM_020135    | WRNIP1    | 31.9  | 20.0  | -0.7 | 1.6 | 5.0E-05 |
| NM_015073    | SIPA1L3   | 1.8   | 1.1   | -0.7 | 1.6 | 5.3E-03 |
| NM_001040456 | RHBDD2    | 38.3  | 24.0  | -0.7 | 1.6 | 5.0E-05 |
| NM_032532    | FNDC1     | 57.1  | 35.8  | -0.7 | 1.6 | 5.0E-05 |
| NM_001201536 | TAF1A     | 7.8   | 4.9   | -0.7 | 1.6 | 5.0E-05 |
| NM_031454    | SELO      | 18.0  | 11.3  | -0.7 | 1.6 | 5.0E-05 |
| NM_015897    | PIAS4     | 15.4  | 9.7   | -0.7 | 1.6 | 5.0E-05 |



|              |          |       |       |      |     |         |
|--------------|----------|-------|-------|------|-----|---------|
| NM_001040135 | ACTR3B   | 2.3   | 1.4   | -0.7 | 1.6 | 5.0E-05 |
| NM_001130142 | VWA5A    | 5.0   | 3.1   | -0.7 | 1.6 | 5.0E-05 |
| NM_001129994 | KCTD15   | 15.0  | 9.4   | -0.7 | 1.6 | 5.0E-05 |
| NM_001204514 | KIFAP3   | 8.3   | 5.2   | -0.7 | 1.6 | 5.0E-05 |
| NM_001619    | ADRBK1   | 20.7  | 13.0  | -0.7 | 1.6 | 5.0E-05 |
| NM_002449    | MSX2     | 5.1   | 3.2   | -0.7 | 1.6 | 5.0E-05 |
| NR_002822    | MGC72080 | 10.9  | 6.9   | -0.7 | 1.6 | 5.0E-05 |
| NM_001017979 | RAB28    | 9.2   | 5.8   | -0.7 | 1.6 | 5.0E-05 |
| NM_145249    | IFI27L1  | 18.4  | 11.6  | -0.7 | 1.6 | 5.0E-05 |
| NM_198525    | KIF7     | 11.3  | 7.1   | -0.7 | 1.6 | 5.0E-05 |
| NM_005530    | IDH3A    | 19.8  | 12.5  | -0.7 | 1.6 | 5.0E-05 |
| NM_001078650 | TMEM134  | 20.2  | 12.7  | -0.7 | 1.6 | 5.0E-05 |
| NM_004406    | DMBT1    | 3.6   | 2.2   | -0.7 | 1.6 | 5.0E-05 |
| NM_001007    | RPS4X    | 829.7 | 522.7 | -0.7 | 1.6 | 5.0E-05 |
| NM_001289095 | PXK      | 10.2  | 6.4   | -0.7 | 1.6 | 1.5E-04 |
| NM_001040667 | HSF4     | 2.8   | 1.8   | -0.7 | 1.6 | 5.0E-05 |
| NM_002284    | KRT86    | 4.7   | 3.0   | -0.7 | 1.6 | 7.6E-03 |
| NM_005439    | MLF2     | 126.2 | 79.6  | -0.7 | 1.6 | 5.0E-05 |
| NM_000674    | ADORA1   | 6.0   | 3.8   | -0.7 | 1.6 | 5.0E-05 |
| NM_001160184 | PLEKHN1  | 10.2  | 6.4   | -0.7 | 1.6 | 7.0E-03 |
| NM_012200    | B3GAT3   | 37.9  | 23.9  | -0.7 | 1.6 | 5.0E-05 |
| NM_021974    | POLR2F   | 24.8  | 15.7  | -0.7 | 1.6 | 5.0E-05 |
| NM_000255    | MUT      | 6.7   | 4.2   | -0.7 | 1.6 | 5.0E-05 |
| NM_006951    | TAF5     | 4.0   | 2.5   | -0.7 | 1.6 | 2.0E-03 |
| NM_000848    | GSTM2    | 7.5   | 4.8   | -0.7 | 1.6 | 5.0E-05 |
| NM_001005914 | SEMA3B   | 3.6   | 2.2   | -0.7 | 1.6 | 5.0E-05 |
| NM_015528    | RNF167   | 51.4  | 32.5  | -0.7 | 1.6 | 5.0E-05 |
| NM_001282684 | KCTD17   | 24.9  | 15.7  | -0.7 | 1.6 | 5.0E-05 |
| NM_001080446 | C11orf94 | 5.8   | 3.7   | -0.7 | 1.6 | 5.0E-05 |
| NM_001101340 | ADM5     | 160.9 | 101.8 | -0.7 | 1.6 | 5.0E-05 |
| NM_016612    | SLC25A37 | 18.9  | 12.0  | -0.7 | 1.6 | 5.0E-05 |
| NM_001916    | CYC1     | 149.4 | 94.6  | -0.7 | 1.6 | 5.0E-05 |
| NM_001005271 | CHD3     | 25.5  | 16.7  | -0.7 | 1.6 | 5.0E-05 |
| NM_014402    | UQCRQ    | 136.0 | 86.1  | -0.7 | 1.6 | 5.0E-05 |
| NM_001143996 | OGDHL    | 3.8   | 2.4   | -0.7 | 1.6 | 5.0E-05 |
| NM_017696    | MCM9     | 3.1   | 1.9   | -0.7 | 1.6 | 5.0E-05 |
| NM_004302    | ACVR1B   | 17.3  | 11.0  | -0.7 | 1.6 | 5.0E-05 |
| NM_017617    | NOTCH1   | 7.0   | 4.4   | -0.7 | 1.6 | 5.0E-05 |
| NM_015420    | DCAF13   | 27.1  | 17.2  | -0.7 | 1.6 | 5.0E-05 |
| NM_002622    | PFDN1    | 105.1 | 66.6  | -0.7 | 1.6 | 5.0E-05 |
| NM_001145438 | PGAP2    | 15.9  | 10.1  | -0.7 | 1.6 | 6.1E-03 |
| NM_018593    | SLC16A10 | 1.5   | 1.0   | -0.7 | 1.6 | 5.0E-05 |
| NM_004148    | NINJ1    | 38.8  | 24.6  | -0.7 | 1.6 | 5.0E-05 |
| NM_006305    | ANP32A   | 52.1  | 33.1  | -0.7 | 1.6 | 5.0E-05 |
| NM_001163377 | QPCTL    | 7.6   | 4.8   | -0.7 | 1.6 | 2.4E-02 |
| NM_001193646 | ATF5     | 20.4  | 13.0  | -0.7 | 1.6 | 8.5E-04 |
| NM_001017927 | C2orf76  | 6.8   | 4.3   | -0.7 | 1.6 | 5.0E-05 |
| NM_001863    | COX6B1   | 243.6 | 154.7 | -0.7 | 1.6 | 5.0E-05 |
| NM_025077    | TOE1     | 15.4  | 9.8   | -0.7 | 1.6 | 5.0E-05 |
| NM_014067    | MACROD1  | 10.9  | 6.9   | -0.7 | 1.6 | 2.0E-02 |
| NM_002661    | PLCG2    | 3.9   | 2.4   | -0.7 | 1.6 | 5.0E-05 |
| NM_001199111 | MDH1     | 111.8 | 71.0  | -0.7 | 1.6 | 5.0E-05 |
| NM_001206974 | DHPS     | 118.6 | 75.4  | -0.7 | 1.6 | 5.0E-05 |
| NM_000624    | SERPINA5 | 2.1   | 1.3   | -0.7 | 1.6 | 5.0E-05 |
| NM_032140    | ENKD1    | 11.7  | 7.4   | -0.7 | 1.6 | 5.0E-05 |
| NM_030767    | AKNA     | 4.3   | 2.7   | -0.7 | 1.6 | 5.0E-05 |
| NM_001002017 | HCFC1R1  | 59.1  | 37.6  | -0.7 | 1.6 | 4.7E-03 |
| NM_020376    | PNPLA2   | 42.9  | 27.3  | -0.7 | 1.6 | 5.0E-05 |
| NM_001252197 | IRX5     | 2.6   | 1.6   | -0.7 | 1.6 | 5.0E-05 |
| NM_001144072 | UBAC2    | 14.6  | 9.3   | -0.7 | 1.6 | 5.0E-05 |
| NM_152305    | POGLUT1  | 8.4   | 5.3   | -0.7 | 1.6 | 5.0E-05 |

|              |         |        |        |      |     |         |
|--------------|---------|--------|--------|------|-----|---------|
| NM_001852    | COL9A2  | 4.8    | 3.1    | -0.7 | 1.6 | 5.0E-05 |
| NM_001142501 | MON1A   | 7.6    | 4.9    | -0.7 | 1.6 | 5.0E-05 |
| NM_000154    | GALK1   | 27.3   | 17.4   | -0.7 | 1.6 | 5.0E-05 |
| NM_006509    | RELB    | 16.0   | 10.2   | -0.6 | 1.6 | 5.0E-05 |
| NM_001172745 | SEC23B  | 32.4   | 20.7   | -0.6 | 1.6 | 5.0E-05 |
| NM_001134658 | SLC35G1 | 4.8    | 3.0    | -0.6 | 1.6 | 5.0E-05 |
| NM_138797    | ANKRD54 | 14.4   | 9.2    | -0.6 | 1.6 | 5.0E-05 |
| NM_001085454 | GIT1    | 21.6   | 13.8   | -0.6 | 1.6 | 5.0E-05 |
| NM_001143906 | TRAFD1  | 19.4   | 12.4   | -0.6 | 1.6 | 5.0E-05 |
| NM_000991    | RPL28   | 555.4  | 354.2  | -0.6 | 1.6 | 5.0E-05 |
| NM_017824    | MARCH5  | 12.7   | 8.1    | -0.6 | 1.6 | 5.0E-05 |
| NM_001035267 | RPL41   | 3303.1 | 2106.9 | -0.6 | 1.6 | 5.0E-05 |
| NM_006371    | CRTAP   | 30.8   | 19.6   | -0.6 | 1.6 | 5.0E-05 |
| NM_001134418 | LEPREL1 | 128.6  | 82.1   | -0.6 | 1.6 | 5.0E-05 |
| NM_198686    | RAB15   | 13.6   | 8.7    | -0.6 | 1.6 | 2.0E-04 |
| NM_001130721 | ELOVL6  | 13.3   | 8.5    | -0.6 | 1.6 | 5.0E-05 |
| NM_001289396 | SMARCA2 | 24.6   | 15.7   | -0.6 | 1.6 | 5.0E-05 |
| NM_001171818 | PPARD   | 21.2   | 13.6   | -0.6 | 1.6 | 5.0E-05 |
| NM_001093767 | FAM195B | 65.8   | 42.0   | -0.6 | 1.6 | 5.0E-05 |
| NM_001025201 | CHN1    | 6.5    | 4.1    | -0.6 | 1.6 | 5.0E-05 |
| NM_022766    | CERK    | 19.9   | 12.7   | -0.6 | 1.6 | 5.0E-05 |
| NM_001150    | ANPEP   | 25.7   | 16.5   | -0.6 | 1.6 | 5.0E-05 |
| NM_001184    | ATR     | 6.7    | 4.3    | -0.6 | 1.6 | 5.0E-05 |
| NM_000175    | GPI     | 131.2  | 83.9   | -0.6 | 1.6 | 5.0E-05 |
| NM_003335    | UBA7    | 8.3    | 5.3    | -0.6 | 1.6 | 5.0E-05 |
| NM_001135239 | LDHA    | 1345.3 | 860.2  | -0.6 | 1.6 | 5.0E-05 |
| NM_006898    | HOXD3   | 16.5   | 10.5   | -0.6 | 1.6 | 5.0E-05 |
| NM_003311    | PHLDA2  | 41.0   | 26.2   | -0.6 | 1.6 | 5.0E-05 |
| NM_021105    | PLSCR1  | 20.7   | 13.2   | -0.6 | 1.6 | 5.0E-05 |
| NM_001032381 | PQBP1   | 57.9   | 37.1   | -0.6 | 1.6 | 5.0E-05 |
| NM_002601    | PDE6D   | 22.2   | 14.2   | -0.6 | 1.6 | 5.0E-05 |
| NM_001098483 | FUOM    | 17.2   | 11.0   | -0.6 | 1.6 | 5.0E-05 |
| NM_032854    | CORO6   | 3.5    | 2.2    | -0.6 | 1.6 | 5.0E-05 |
| NM_014317    | PDSS1   | 10.7   | 6.9    | -0.6 | 1.6 | 8.0E-04 |
| NM_001008396 | WDHD1   | 9.2    | 5.9    | -0.6 | 1.6 | 5.0E-05 |
| NM_022823    | FNDC4   | 8.2    | 5.2    | -0.6 | 1.6 | 5.0E-05 |
| NM_006681    | NMU     | 1.8    | 1.1    | -0.6 | 1.6 | 1.7E-03 |
| NM_002245    | KCNK1   | 3.1    | 2.0    | -0.6 | 1.6 | 5.0E-05 |
| NM_024902    | DNAJC22 | 12.9   | 8.3    | -0.6 | 1.6 | 5.0E-05 |
| NM_181723    | MICU3   | 2.3    | 1.5    | -0.6 | 1.6 | 5.0E-05 |
| NM_001128212 | WDSUB1  | 4.1    | 2.6    | -0.6 | 1.6 | 5.0E-05 |
| NM_001202403 | ASB6    | 11.1   | 7.1    | -0.6 | 1.6 | 5.0E-05 |
| NM_182565    | UBALD2  | 14.8   | 9.5    | -0.6 | 1.6 | 5.0E-05 |
| NM_001127615 | ENOX1   | 1.5    | 1.0    | -0.6 | 1.6 | 5.0E-05 |
| NM_031442    | TMEM47  | 9.3    | 6.0    | -0.6 | 1.6 | 5.0E-05 |
| NM_016558    | SCAND1  | 22.4   | 14.4   | -0.6 | 1.6 | 5.0E-05 |
| NM_006909    | RASGRF2 | 3.9    | 2.5    | -0.6 | 1.6 | 9.0E-04 |
| NM_001130675 | CLGN    | 4.8    | 3.1    | -0.6 | 1.6 | 5.0E-05 |
| NM_012317    | LDOC1   | 14.2   | 9.1    | -0.6 | 1.6 | 5.0E-05 |
| NM_000135    | FANCA   | 24.4   | 15.7   | -0.6 | 1.6 | 5.0E-05 |
| NM_001135053 | SIGIRR  | 5.7    | 3.7    | -0.6 | 1.6 | 5.0E-05 |
| NM_018490    | LGR4    | 11.8   | 7.6    | -0.6 | 1.6 | 5.0E-05 |
| NM_001015881 | TSC22D3 | 34.5   | 22.2   | -0.6 | 1.6 | 5.0E-05 |
| NM_003993    | CLK2    | 63.0   | 40.6   | -0.6 | 1.6 | 5.0E-05 |
| NM_001031746 | VSTM4   | 2.3    | 1.5    | -0.6 | 1.6 | 5.0E-05 |
| NM_001145853 | WFS1    | 14.5   | 9.4    | -0.6 | 1.6 | 5.0E-05 |
| NM_001284501 | NUBP2   | 47.6   | 30.7   | -0.6 | 1.6 | 5.0E-05 |
| NM_001204519 | P2RX5   | 78.9   | 50.8   | -0.6 | 1.6 | 5.0E-05 |
| NM_024963    | FBXL18  | 11.7   | 7.5    | -0.6 | 1.6 | 5.0E-05 |
| NM_001025091 | ABCF1   | 55.8   | 36.0   | -0.6 | 1.6 | 5.0E-05 |
| NM_014639    | TTC37   | 27.4   | 17.7   | -0.6 | 1.6 | 5.0E-05 |

|              |           |       |       |      |     |         |
|--------------|-----------|-------|-------|------|-----|---------|
| NM_032352    | BRMS1L    | 10.8  | 7.0   | -0.6 | 1.5 | 5.0E-05 |
| NM_176880    | NR2C2AP   | 11.3  | 7.3   | -0.6 | 1.5 | 4.0E-03 |
| NR_045839    | ANKRD11   | 4.2   | 2.7   | -0.6 | 1.5 | 1.9E-03 |
| NM_001256119 | NAA10     | 60.9  | 39.4  | -0.6 | 1.5 | 5.0E-05 |
| NM_001288718 | STAT5A    | 2.5   | 1.6   | -0.6 | 1.5 | 5.0E-05 |
| NM_001242758 | HLA-A     | 305.4 | 197.3 | -0.6 | 1.5 | 5.0E-05 |
| NM_001002258 | ATP5G3    | 87.4  | 56.5  | -0.6 | 1.5 | 5.0E-05 |
| NM_001242597 | TMEM147   | 84.7  | 54.7  | -0.6 | 1.5 | 5.0E-05 |
| NM_004330    | BNIP2     | 20.0  | 13.0  | -0.6 | 1.5 | 5.0E-05 |
| NM_000408    | GPD2      | 11.8  | 7.6   | -0.6 | 1.5 | 5.0E-05 |
| NM_000666    | ACY1      | 25.9  | 16.8  | -0.6 | 1.5 | 2.5E-04 |
| NM_014819    | PJA2      | 35.1  | 22.7  | -0.6 | 1.5 | 5.0E-05 |
| NM_014059    | RGCC      | 2.6   | 1.7   | -0.6 | 1.5 | 5.0E-05 |
| NM_001184854 | KLHDC4    | 19.3  | 12.5  | -0.6 | 1.5 | 5.0E-05 |
| NM_001198810 | SLC43A1   | 4.6   | 2.9   | -0.6 | 1.5 | 5.0E-05 |
| NM_001286365 | MAP7D1    | 55.0  | 35.6  | -0.6 | 1.5 | 5.0E-05 |
| NM_005110    | GFPT2     | 70.7  | 45.8  | -0.6 | 1.5 | 5.0E-05 |
| NM_001167947 | TIMM17B   | 58.7  | 38.0  | -0.6 | 1.5 | 5.0E-05 |
| NM_015941    | ATP6V1H   | 31.5  | 20.4  | -0.6 | 1.5 | 5.0E-05 |
| NM_002224    | ITPR3     | 28.9  | 18.7  | -0.6 | 1.5 | 5.0E-05 |
| NM_001286132 | RPP40     | 12.9  | 8.4   | -0.6 | 1.5 | 5.0E-05 |
| NM_001130067 | TRIM2     | 2.8   | 1.8   | -0.6 | 1.5 | 5.0E-05 |
| NM_021130    | PPIA      | 538.5 | 349.1 | -0.6 | 1.5 | 5.0E-05 |
| NR_015432    | LINC00493 | 43.4  | 28.2  | -0.6 | 1.5 | 5.0E-05 |
| NM_001012727 | AGPAT2    | 45.8  | 29.7  | -0.6 | 1.5 | 5.0E-05 |
| NM_001145971 | RDH13     | 7.9   | 5.1   | -0.6 | 1.5 | 5.0E-05 |
| NM_016577    | RAB6B     | 1.9   | 1.2   | -0.6 | 1.5 | 2.5E-02 |
| NM_001040668 | BCL2L12   | 35.8  | 23.3  | -0.6 | 1.5 | 5.0E-05 |
| NM_001170464 | CDK17     | 14.7  | 9.5   | -0.6 | 1.5 | 5.0E-05 |
| NM_019099    | FAM212B   | 1.6   | 1.0   | -0.6 | 1.5 | 2.5E-03 |
| NM_138820    | HIGD2A    | 138.7 | 90.1  | -0.6 | 1.5 | 5.0E-05 |
| NM_001015882 | DNAJC25   | 86.2  | 56.0  | -0.6 | 1.5 | 5.0E-05 |
| NM_001083893 | STRN3     | 13.4  | 8.7   | -0.6 | 1.5 | 5.0E-05 |
| NM_000207    | INS       | 4.4   | 2.9   | -0.6 | 1.5 | 5.0E-05 |
| NM_015139    | SLC35D1   | 6.8   | 4.5   | -0.6 | 1.5 | 5.0E-05 |
| NM_001031713 | MCUR1     | 10.3  | 6.7   | -0.6 | 1.5 | 5.0E-05 |
| NM_003345    | UBE2I     | 53.4  | 34.8  | -0.6 | 1.5 | 5.0E-05 |
| NM_001278669 | NFATC1    | 3.8   | 2.5   | -0.6 | 1.5 | 5.0E-05 |
| NM_001244949 | GPAM      | 12.1  | 7.9   | -0.6 | 1.5 | 5.0E-05 |
| NM_017823    | DUSP23    | 42.0  | 27.3  | -0.6 | 1.5 | 5.0E-05 |
| NM_025106    | SPSB1     | 12.1  | 7.9   | -0.6 | 1.5 | 5.0E-05 |
| NM_001242854 | ARFIP2    | 16.0  | 10.4  | -0.6 | 1.5 | 5.0E-05 |
| NM_005908    | MANBA     | 8.3   | 5.4   | -0.6 | 1.5 | 5.0E-05 |
| NM_001141973 | ATP13A2   | 25.0  | 15.9  | -0.6 | 1.5 | 5.0E-05 |
| NM_001201472 | CORO7     | 48.7  | 31.7  | -0.6 | 1.5 | 1.4E-03 |
| NM_001270927 | IFIT1     | 2.9   | 1.9   | -0.6 | 1.5 | 5.0E-05 |
| NM_201566    | SLC16A13  | 2.6   | 1.7   | -0.6 | 1.5 | 5.0E-05 |
| NM_001098817 | INO80C    | 12.1  | 7.9   | -0.6 | 1.5 | 5.0E-05 |
| NM_176870    | MT1M      | 39.6  | 25.8  | -0.6 | 1.5 | 5.0E-05 |
| NM_001083600 | NAA60     | 19.4  | 12.7  | -0.6 | 1.5 | 5.0E-05 |
| NM_022037    | TIA1      | 17.1  | 11.1  | -0.6 | 1.5 | 5.0E-05 |
| NM_024078    | NOC4L     | 23.3  | 15.2  | -0.6 | 1.5 | 5.0E-05 |
| NM_001097599 | SLC35G2   | 15.0  | 9.8   | -0.6 | 1.5 | 5.0E-05 |
| NM_017582    | UBE2Q1    | 21.0  | 13.7  | -0.6 | 1.5 | 5.0E-05 |
| NM_032861    | SERAC1    | 4.3   | 2.8   | -0.6 | 1.5 | 5.0E-05 |
| NM_001281297 | EDF1      | 322.5 | 210.7 | -0.6 | 1.5 | 5.0E-05 |
| NM_005034    | POLR2K    | 66.5  | 43.5  | -0.6 | 1.5 | 5.0E-05 |
| NM_001193493 | SLC1A4    | 13.6  | 8.9   | -0.6 | 1.5 | 5.0E-05 |
| NM_001170635 | LPPR2     | 20.4  | 13.3  | -0.6 | 1.5 | 5.0E-05 |
| NM_001164501 | EIF4ENIF1 | 8.8   | 5.7   | -0.6 | 1.5 | 5.0E-05 |
| NM_001164814 | ACIN1     | 91.4  | 59.8  | -0.6 | 1.5 | 5.0E-05 |

|              |           |       |       |      |     |         |
|--------------|-----------|-------|-------|------|-----|---------|
| NM_015268    | DNAJC13   | 12.9  | 8.5   | -0.6 | 1.5 | 5.0E-05 |
| NM_001009811 | AZI1      | 7.8   | 5.1   | -0.6 | 1.5 | 5.0E-05 |
| NM_001195731 | CHPF      | 27.6  | 18.1  | -0.6 | 1.5 | 5.0E-05 |
| NM_031212    | SLC25A28  | 16.3  | 10.7  | -0.6 | 1.5 | 5.0E-05 |
| NM_001160042 | IQCC      | 47.0  | 30.8  | -0.6 | 1.5 | 5.0E-05 |
| NM_001171937 | FUZ       | 9.8   | 6.4   | -0.6 | 1.5 | 2.6E-02 |
| NM_004260    | RECQL4    | 24.8  | 16.3  | -0.6 | 1.5 | 5.0E-05 |
| NM_001199570 | CLIP3     | 12.9  | 8.5   | -0.6 | 1.5 | 5.0E-05 |
| NM_015201    | BOP1      | 40.9  | 26.8  | -0.6 | 1.5 | 5.0E-05 |
| NM_001278505 | GPATCH11  | 7.8   | 5.1   | -0.6 | 1.5 | 1.1E-03 |
| NM_001033046 | C17orf62  | 21.4  | 14.1  | -0.6 | 1.5 | 5.0E-05 |
| NM_005207    | CRKL      | 23.0  | 15.1  | -0.6 | 1.5 | 5.0E-05 |
| NM_020397    | CAMK1D    | 4.8   | 3.1   | -0.6 | 1.5 | 5.0E-05 |
| NM_015004    | EXOSC7    | 45.8  | 30.1  | -0.6 | 1.5 | 2.0E-04 |
| NM_198282    | TMEM173   | 28.1  | 18.4  | -0.6 | 1.5 | 5.0E-05 |
| NM_001031680 | RUNX3     | 6.1   | 4.0   | -0.6 | 1.5 | 5.0E-05 |
| NM_004292    | RIN1      | 8.6   | 5.7   | -0.6 | 1.5 | 5.0E-05 |
| NM_015603    | CCDC9     | 28.9  | 19.0  | -0.6 | 1.5 | 5.0E-05 |
| NM_001862    | COX5B     | 257.0 | 169.0 | -0.6 | 1.5 | 5.0E-05 |
| NM_004927    | MRPL49    | 30.5  | 20.0  | -0.6 | 1.5 | 3.6E-03 |
| NM_153006    | NAGS      | 1.8   | 1.2   | -0.6 | 1.5 | 5.0E-05 |
| NM_014225    | PPP2R1A   | 120.3 | 79.2  | -0.6 | 1.5 | 5.0E-05 |
| NM_032306    | ALKBH7    | 27.9  | 18.4  | -0.6 | 1.5 | 2.0E-03 |
| NM_001284367 | NDUFB8    | 175.3 | 115.5 | -0.6 | 1.5 | 5.0E-05 |
| NM_006349    | ZNHIT1    | 53.0  | 34.9  | -0.6 | 1.5 | 4.0E-04 |
| NM_016307    | PRRX2     | 17.6  | 11.6  | -0.6 | 1.5 | 5.0E-05 |
| NM_001665    | RHOG      | 37.9  | 25.0  | -0.6 | 1.5 | 5.0E-05 |
| NM_152309    | PIK3AP1   | 2.8   | 1.9   | -0.6 | 1.5 | 5.0E-05 |
| NM_000199    | SGSH      | 12.8  | 8.4   | -0.6 | 1.5 | 5.0E-05 |
| NM_203290    | POLR1C    | 26.7  | 17.6  | -0.6 | 1.5 | 5.0E-05 |
| NM_001123383 | BCOR      | 12.1  | 8.0   | -0.6 | 1.5 | 5.0E-05 |
| NM_005949    | MT1F      | 46.5  | 30.7  | -0.6 | 1.5 | 5.0E-05 |
| NM_000487    | ARSA      | 6.3   | 4.2   | -0.6 | 1.5 | 5.0E-05 |
| NM_024939    | ESRP2     | 2.8   | 1.8   | -0.6 | 1.5 | 7.5E-03 |
| NM_001163724 | SMIM1     | 2.6   | 1.7   | -0.6 | 1.5 | 5.0E-03 |
| NM_001286699 | RCL1      | 11.5  | 7.6   | -0.6 | 1.5 | 5.0E-05 |
| NM_001260492 | RDX       | 51.9  | 34.2  | -0.6 | 1.5 | 5.0E-05 |
| NM_001040715 | KIAA0895L | 6.5   | 4.3   | -0.6 | 1.5 | 2.5E-04 |
| NM_001003704 | MTFP1     | 44.1  | 29.1  | -0.6 | 1.5 | 5.0E-05 |
| NM_004503    | HOXC6     | 11.3  | 7.4   | -0.6 | 1.5 | 5.0E-05 |
| NM_000857    | GUCY1B3   | 2.2   | 1.5   | -0.6 | 1.5 | 5.0E-05 |
| NM_001144761 | TLE2      | 11.1  | 7.4   | -0.6 | 1.5 | 5.0E-05 |
| NM_001042371 | PGP       | 20.5  | 13.5  | -0.6 | 1.5 | 5.0E-05 |
| NM_001166103 | SPINT2    | 7.6   | 5.1   | -0.6 | 1.5 | 5.0E-05 |
| NM_014231    | VAMP1     | 10.2  | 6.7   | -0.6 | 1.5 | 5.0E-05 |
| NM_001146314 | ABHD14B   | 40.2  | 26.5  | -0.6 | 1.5 | 5.0E-05 |
| NM_015091    | FAM179B   | 4.3   | 2.9   | -0.6 | 1.5 | 5.0E-05 |
| NM_001143917 | LYSMD2    | 4.8   | 3.2   | -0.6 | 1.5 | 5.0E-05 |
| NM_001920    | DCN       | 47.4  | 31.4  | -0.6 | 1.5 | 5.0E-05 |
| NM_001127257 | SLC39A10  | 18.1  | 12.0  | -0.6 | 1.5 | 5.0E-05 |
| NM_014757    | MAML1     | 17.2  | 11.4  | -0.6 | 1.5 | 5.0E-05 |
| NM_001198934 | ABCC10    | 6.3   | 4.1   | -0.6 | 1.5 | 5.0E-05 |
| NM_001008393 | C4orf46   | 7.4   | 4.9   | -0.6 | 1.5 | 5.0E-05 |
| NM_001098478 | HLA-F     | 17.8  | 11.8  | -0.6 | 1.5 | 5.0E-05 |
| NM_001278201 | SLC43A3   | 84.6  | 56.0  | -0.6 | 1.5 | 5.0E-05 |
| NM_004463    | FGD1      | 6.3   | 4.2   | -0.6 | 1.5 | 5.0E-05 |
| NR_037701    | PKI55     | 2.7   | 1.8   | -0.6 | 1.5 | 5.0E-05 |
| NM_001501    | GNRH2     | 50.3  | 33.3  | -0.6 | 1.5 | 5.0E-05 |
| NM_014297    | ETHE1     | 22.4  | 14.9  | -0.6 | 1.5 | 5.0E-05 |
| NM_001415    | EIF2S3    | 74.9  | 49.6  | -0.6 | 1.5 | 5.0E-05 |
| NM_032346    | PDCD2L    | 10.5  | 7.0   | -0.6 | 1.5 | 5.0E-05 |

|              |          |        |       |      |     |         |
|--------------|----------|--------|-------|------|-----|---------|
| NM_182603    | ANKRD42  | 4.3    | 2.8   | -0.6 | 1.5 | 4.5E-04 |
| NM_005646    | TARBP1   | 9.8    | 6.5   | -0.6 | 1.5 | 5.0E-05 |
| NM_025108    | C16orf59 | 11.8   | 7.8   | -0.6 | 1.5 | 5.0E-05 |
| NM_031921    | ATAD3B   | 2.5    | 1.6   | -0.6 | 1.5 | 2.5E-02 |
| NM_000031    | ALAD     | 13.2   | 8.8   | -0.6 | 1.5 | 5.0E-05 |
| NM_175063    | EMC10    | 51.0   | 33.8  | -0.6 | 1.5 | 5.0E-05 |
| NM_015447    | CAMSAP1  | 12.1   | 8.0   | -0.6 | 1.5 | 5.0E-05 |
| NM_001170634 | FUS      | 150.5  | 99.9  | -0.6 | 1.5 | 5.0E-05 |
| NM_032268    | ZNRF1    | 5.2    | 3.5   | -0.6 | 1.5 | 5.0E-05 |
| NM_000584    | IL8      | 7.4    | 4.9   | -0.6 | 1.5 | 5.0E-05 |
| NM_007208    | MRPL3    | 70.4   | 46.8  | -0.6 | 1.5 | 5.0E-05 |
| NM_001270691 | SMOX     | 27.6   | 18.3  | -0.6 | 1.5 | 5.0E-05 |
| NM_033257    | DGCR6L   | 42.7   | 28.4  | -0.6 | 1.5 | 5.0E-05 |
| NM_001253815 | SLC52A2  | 48.9   | 32.5  | -0.6 | 1.5 | 5.0E-05 |
| NM_001276342 | C18orf8  | 15.0   | 10.0  | -0.6 | 1.5 | 7.1E-03 |
| NM_033502    | TRERF1   | 2.4    | 1.6   | -0.6 | 1.5 | 5.0E-05 |
| NM_001004023 | DYRK3    | 7.6    | 5.1   | -0.6 | 1.5 | 5.0E-05 |
| NM_002111    | HTT      | 10.4   | 6.9   | -0.6 | 1.5 | 5.0E-05 |
| NM_001253826 | GALNT14  | 18.9   | 12.6  | -0.6 | 1.5 | 5.0E-05 |
| NM_001114393 | PAPD4    | 12.5   | 8.3   | -0.6 | 1.5 | 5.0E-05 |
| NM_003660    | PPFIA3   | 2.5    | 1.6   | -0.6 | 1.5 | 5.0E-05 |
| NM_001166599 | FAM122B  | 12.7   | 8.4   | -0.6 | 1.5 | 5.0E-05 |
| NM_001136019 | FCGRT    | 36.8   | 24.5  | -0.6 | 1.5 | 5.0E-05 |
| NM_001170750 | SRPX     | 14.3   | 9.5   | -0.6 | 1.5 | 5.0E-05 |
| NM_138572    | TAF8     | 14.0   | 9.3   | -0.6 | 1.5 | 1.0E-04 |
| NM_014801    | PCNXL2   | 2.7    | 1.8   | -0.6 | 1.5 | 5.0E-05 |
| NM_001136022 | NFATC4   | 3.4    | 2.2   | -0.6 | 1.5 | 5.0E-05 |
| NM_001257360 | AMPD2    | 13.5   | 9.0   | -0.6 | 1.5 | 5.0E-05 |
| NM_014467    | SRPX2    | 4.1    | 2.7   | -0.6 | 1.5 | 3.0E-04 |
| NM_024031    | PRR14    | 12.8   | 8.5   | -0.6 | 1.5 | 5.0E-05 |
| NM_001004019 | FBLN2    | 30.3   | 20.2  | -0.6 | 1.5 | 5.0E-05 |
| NM_001206559 | POLR1D   | 46.2   | 30.8  | -0.6 | 1.5 | 5.0E-05 |
| NM_001001975 | ATP5D    | 97.6   | 65.0  | -0.6 | 1.5 | 5.0E-05 |
| NM_001143919 | LTB4R    | 13.7   | 9.1   | -0.6 | 1.5 | 5.0E-05 |
| NM_152769    | C19orf26 | 3.7    | 2.4   | -0.6 | 1.5 | 1.3E-02 |
| NM_013355    | PKN3     | 12.1   | 8.1   | -0.6 | 1.5 | 5.0E-05 |
| NM_001201407 | ZNF778   | 4.1    | 2.7   | -0.6 | 1.5 | 5.0E-05 |
| NM_001287516 | CDC25B   | 47.0   | 31.4  | -0.6 | 1.5 | 5.0E-05 |
| NM_001278698 | POLR2H   | 50.7   | 33.8  | -0.6 | 1.5 | 5.0E-05 |
| NM_001271765 | SLC16A5  | 14.7   | 9.8   | -0.6 | 1.5 | 5.0E-05 |
| NM_007315    | STAT1    | 66.6   | 44.5  | -0.6 | 1.5 | 5.0E-05 |
| NM_032451    | SPIRE2   | 4.6    | 3.0   | -0.6 | 1.5 | 5.0E-05 |
| NM_001099856 | IKBKG    | 13.4   | 9.0   | -0.6 | 1.5 | 2.5E-03 |
| NM_015354    | NUP188   | 44.6   | 29.8  | -0.6 | 1.5 | 5.0E-05 |
| NM_004972    | JAK2     | 3.1    | 2.1   | -0.6 | 1.5 | 5.0E-05 |
| NM_001278293 | ARL6     | 2.2    | 1.5   | -0.6 | 1.5 | 1.5E-04 |
| NM_001136053 | TPRA1    | 26.3   | 17.6  | -0.6 | 1.5 | 5.0E-05 |
| NM_012393    | PFAS     | 24.8   | 16.6  | -0.6 | 1.5 | 5.0E-05 |
| NM_003864    | SAP30    | 12.6   | 8.4   | -0.6 | 1.5 | 5.0E-05 |
| NM_182924    | MICALL2  | 6.1    | 4.0   | -0.6 | 1.5 | 5.0E-05 |
| NM_001084392 | DDT      | 29.6   | 19.8  | -0.6 | 1.5 | 5.0E-05 |
| NM_002266    | KPNA2    | 366.9  | 245.5 | -0.6 | 1.5 | 5.0E-05 |
| NM_000904    | NQO2     | 33.4   | 22.4  | -0.6 | 1.5 | 5.0E-05 |
| NM_001286245 | DTX3     | 10.9   | 7.3   | -0.6 | 1.5 | 5.0E-05 |
| NM_001145928 | SAP130   | 15.0   | 10.1  | -0.6 | 1.5 | 5.0E-05 |
| NM_001018    | RPS15    | 1140.5 | 763.5 | -0.6 | 1.5 | 5.0E-05 |
| NM_024299    | PPDPF    | 168.9  | 113.1 | -0.6 | 1.5 | 5.0E-05 |
| NM_006897    | HOXC9    | 2.2    | 1.5   | -0.6 | 1.5 | 5.0E-05 |
| NM_022165    | LIN7B    | 6.6    | 4.4   | -0.6 | 1.5 | 5.5E-04 |
| NM_152517    | TTC30B   | 1.8    | 1.2   | -0.6 | 1.5 | 5.0E-05 |
| NM_024050    | DDA1     | 11.3   | 7.6   | -0.6 | 1.5 | 5.0E-05 |

|              |          |       |       |      |     |         |
|--------------|----------|-------|-------|------|-----|---------|
| NM_019058    | DDIT4    | 173.2 | 116.1 | -0.6 | 1.5 | 5.0E-05 |
| NM_001031801 | LIMK2    | 19.8  | 13.2  | -0.6 | 1.5 | 5.0E-05 |
| NM_001042355 | CYLD     | 6.9   | 4.6   | -0.6 | 1.5 | 5.0E-05 |
| NM_001035521 | GTF3C2   | 18.7  | 12.6  | -0.6 | 1.5 | 5.0E-05 |
| NM_020343    | RALGAPA2 | 1.9   | 1.3   | -0.6 | 1.5 | 5.0E-05 |
| NM_006598    | SLC12A7  | 18.1  | 12.2  | -0.6 | 1.5 | 5.0E-05 |
| NM_000745    | CHRNA5   | 8.8   | 5.9   | -0.6 | 1.5 | 5.0E-05 |
| NM_001769    | CD9      | 89.4  | 60.0  | -0.6 | 1.5 | 5.0E-05 |
| NM_003384    | VRK1     | 28.8  | 19.3  | -0.6 | 1.5 | 5.0E-05 |
| NM_003955    | SOCS3    | 16.0  | 10.7  | -0.6 | 1.5 | 5.0E-05 |
| NM_001272095 | STX4     | 17.6  | 11.8  | -0.6 | 1.5 | 5.0E-05 |
| NM_001145102 | SMAD3    | 14.9  | 10.0  | -0.6 | 1.5 | 5.0E-05 |
| NM_005340    | HINT1    | 523.5 | 351.7 | -0.6 | 1.5 | 5.0E-05 |
| NM_007107    | SSR3     | 97.5  | 65.5  | -0.6 | 1.5 | 5.0E-05 |
| NM_001143964 | TBC1D7   | 25.6  | 17.2  | -0.6 | 1.5 | 5.0E-05 |
| NM_001144831 | PHB2     | 151.7 | 102.0 | -0.6 | 1.5 | 5.0E-05 |
| NM_001111101 | CNRIP1   | 21.0  | 14.1  | -0.6 | 1.5 | 5.0E-05 |
| NM_006285    | TESK1    | 9.0   | 6.0   | -0.6 | 1.5 | 5.0E-05 |
| NM_003086    | SNAPC4   | 7.3   | 4.9   | -0.6 | 1.5 | 5.0E-05 |
| NM_025104    | DBF4B    | 15.9  | 10.7  | -0.6 | 1.5 | 5.0E-05 |
| NM_001099456 | NPW      | 12.4  | 8.4   | -0.6 | 1.5 | 5.0E-05 |
| NM_014050    | MRPL42   | 14.5  | 9.7   | -0.6 | 1.5 | 5.0E-05 |
| NM_001048218 | SCYL1    | 40.7  | 27.4  | -0.6 | 1.5 | 5.0E-05 |
| NM_006877    | GMPR     | 3.8   | 2.6   | -0.6 | 1.5 | 5.0E-05 |
| NM_001098637 | PWWP2B   | 3.3   | 2.2   | -0.6 | 1.5 | 5.0E-05 |
| NM_001128203 | PLA2G16  | 40.5  | 27.3  | -0.6 | 1.5 | 5.0E-05 |
| NM_024319    | C1orf35  | 21.0  | 14.1  | -0.6 | 1.5 | 5.0E-05 |
| NM_032319    | PRADC1   | 21.8  | 14.7  | -0.6 | 1.5 | 5.0E-05 |
| NM_000635    | RFX2     | 3.3   | 2.2   | -0.6 | 1.5 | 5.0E-05 |
| NM_001146258 | PIP4K2C  | 21.1  | 14.2  | -0.6 | 1.5 | 5.0E-05 |
| NM_001167827 | TFEB     | 3.4   | 2.3   | -0.6 | 1.5 | 5.0E-05 |
| NM_003686    | EXO1     | 17.7  | 12.0  | -0.6 | 1.5 | 5.0E-05 |
| NM_006122    | MAN2A2   | 8.6   | 5.8   | -0.6 | 1.5 | 5.0E-05 |
| NM_001286643 | MTERFD1  | 14.9  | 10.0  | -0.6 | 1.5 | 1.7E-02 |
| NM_001017981 | RNF215   | 10.7  | 7.2   | -0.6 | 1.5 | 1.9E-02 |
| NM_001135811 | FAM60A   | 34.9  | 23.5  | -0.6 | 1.5 | 5.0E-05 |
| NM_021930    | RINT1    | 12.8  | 8.7   | -0.6 | 1.5 | 5.0E-05 |
| NM_178167    | ZNF598   | 19.8  | 13.4  | -0.6 | 1.5 | 5.0E-05 |
| NM_001126340 | ORAI2    | 8.6   | 5.8   | -0.6 | 1.5 | 5.0E-05 |
| NM_032329    | ING5     | 8.9   | 6.0   | -0.6 | 1.5 | 5.0E-05 |
| NM_006208    | ENPP1    | 3.1   | 2.1   | -0.6 | 1.5 | 5.0E-05 |
| NM_006255    | PRKCH    | 6.5   | 4.4   | -0.6 | 1.5 | 5.0E-05 |
| NM_001136017 | CCND3    | 108.1 | 73.0  | -0.6 | 1.5 | 5.0E-05 |
| NM_001256105 | WNT5A    | 69.6  | 47.0  | -0.6 | 1.5 | 5.0E-05 |
| NM_030780    | SLC25A32 | 14.4  | 9.7   | -0.6 | 1.5 | 5.0E-05 |
| NM_014784    | ARHGEF11 | 12.3  | 8.3   | -0.6 | 1.5 | 5.0E-05 |
| NM_013230    | CD24     | 213.4 | 144.1 | -0.6 | 1.5 | 5.0E-05 |
| NM_012121    | CDC42EP4 | 21.3  | 14.4  | -0.6 | 1.5 | 5.0E-05 |
| NM_017514    | PLXNA3   | 12.8  | 8.6   | -0.6 | 1.5 | 5.0E-05 |
| NM_001136199 | GRAMD1A  | 24.7  | 16.7  | -0.6 | 1.5 | 5.0E-05 |
| NM_001029989 | KIAA0101 | 74.6  | 50.4  | -0.6 | 1.5 | 5.0E-05 |
| NM_001278495 | NUTM2B   | 2.6   | 1.7   | -0.6 | 1.5 | 7.1E-03 |
| NM_016121    | KCTD3    | 22.5  | 15.2  | -0.6 | 1.5 | 5.0E-05 |
| NM_032477    | MRPL41   | 122.1 | 82.5  | -0.6 | 1.5 | 5.0E-05 |
| NM_198150    | ARSK     | 8.2   | 5.5   | -0.6 | 1.5 | 5.0E-05 |
| NM_001244249 | APEX1    | 102.9 | 69.6  | -0.6 | 1.5 | 5.0E-05 |
| NR_003659    | WASH3P   | 12.5  | 8.4   | -0.6 | 1.5 | 5.0E-05 |
| NM_023079    | UBE2Z    | 46.2  | 31.2  | -0.6 | 1.5 | 5.0E-05 |
| NM_003761    | VAMP8    | 122.9 | 83.2  | -0.6 | 1.5 | 5.0E-05 |
| NM_001042555 | FRS2     | 6.8   | 4.6   | -0.6 | 1.5 | 5.0E-05 |
| NM_183241    | C9orf142 | 32.8  | 22.2  | -0.6 | 1.5 | 5.0E-05 |

|              |                     |        |        |      |     |         |
|--------------|---------------------|--------|--------|------|-----|---------|
| NM_001286259 | ADAT2               | 3.8    | 2.5    | -0.6 | 1.5 | 5.0E-05 |
| NM_020139    | BDH2                | 7.3    | 4.9    | -0.6 | 1.5 | 5.0E-05 |
| NM_024960    | PANK2               | 21.9   | 14.8   | -0.6 | 1.5 | 5.0E-05 |
| NM_012478    | WBP2                | 43.3   | 29.4   | -0.6 | 1.5 | 5.0E-05 |
| NM_001282674 | TNFRSF16            | 195.6  | 132.7  | -0.6 | 1.5 | 5.0E-05 |
| NM_001127889 | SPG21               | 42.1   | 28.6   | -0.6 | 1.5 | 5.0E-05 |
| NM_001170535 | ATAD3A              | 1.8    | 1.2    | -0.6 | 1.5 | 2.4E-02 |
| NM_153332    | ERI1                | 15.9   | 10.8   | -0.6 | 1.5 | 5.0E-05 |
| NM_138356    | SHF                 | 2.3    | 1.6    | -0.6 | 1.5 | 5.0E-05 |
| NM_001144978 | MTHFD2L             | 2.2    | 1.5    | -0.6 | 1.5 | 1.0E-04 |
| NM_006098    | GNB2L1              | 1557.0 | 1057.0 | -0.6 | 1.5 | 5.0E-05 |
| NM_001001485 | ATP2C1              | 32.8   | 22.3   | -0.6 | 1.5 | 5.0E-05 |
| NM_001282669 | DFFB                | 2.9    | 2.0    | -0.6 | 1.5 | 5.0E-05 |
| NM_001004105 | GRK6                | 57.0   | 38.7   | -0.6 | 1.5 | 5.0E-05 |
| NM_001947    | DUSP7               | 13.3   | 9.0    | -0.6 | 1.5 | 5.0E-05 |
| NM_005969    | NAP1L4              | 75.7   | 51.5   | -0.6 | 1.5 | 5.0E-05 |
| NM_001080478 | LRRC14B             | 7.8    | 5.3    | -0.6 | 1.5 | 5.0E-05 |
| NM_207309    | UAP1L1              | 8.6    | 5.8    | -0.6 | 1.5 | 5.0E-05 |
| NM_021034    | IFITM3              | 329.6  | 224.0  | -0.6 | 1.5 | 5.0E-05 |
| NM_032830    | CIRH1A              | 40.4   | 27.5   | -0.6 | 1.5 | 3.0E-04 |
| NM_022117    | TSPYL2              | 20.4   | 13.8   | -0.6 | 1.5 | 5.0E-05 |
| NM_001037808 | EIF3C               | 6.6    | 4.5    | -0.6 | 1.5 | 5.0E-05 |
| NM_007192    | SUPT16H             | 58.0   | 39.5   | -0.6 | 1.5 | 5.0E-05 |
| NM_020158    | EXOSC5              | 23.2   | 15.8   | -0.6 | 1.5 | 5.0E-05 |
| NM_004598    | SPOCK1              | 23.6   | 16.0   | -0.6 | 1.5 | 5.0E-05 |
| NM_014272    | ADAMTS7             | 3.7    | 2.5    | -0.6 | 1.5 | 5.0E-05 |
| NM_173548    | ZNF584              | 6.5    | 4.4    | -0.6 | 1.5 | 5.0E-05 |
| NM_001190981 | IL6ST               | 88.3   | 60.1   | -0.6 | 1.5 | 5.0E-05 |
| NM_001037335 | HELZ2               | 8.5    | 5.8    | -0.6 | 1.5 | 5.0E-05 |
| NM_001130090 | LRRC48              | 1.7    | 1.2    | -0.6 | 1.5 | 1.3E-02 |
| NM_006473    | TAF6L               | 36.0   | 24.5   | -0.6 | 1.5 | 1.6E-03 |
| NM_018113    | LMBR1L              | 13.7   | 9.3    | -0.6 | 1.5 | 5.0E-05 |
| NM_000183    | HADHB               | 52.3   | 35.6   | -0.6 | 1.5 | 5.0E-05 |
| NM_005523    | HOXA11              | 8.4    | 5.7    | -0.6 | 1.5 | 5.0E-05 |
| NM_016076    | DES12               | 18.4   | 12.5   | -0.6 | 1.5 | 5.0E-05 |
| NM_001204204 | SEC14L2MTFP1SEC14L2 | 12.0   | 8.2    | -0.6 | 1.5 | 5.0E-05 |
| NM_001008739 | C6orf226            | 3.6    | 2.4    | -0.6 | 1.5 | 2.4E-03 |
| NM_014867    | KBTD11              | 9.7    | 6.6    | -0.6 | 1.5 | 5.0E-05 |
| NM_004398    | DDX10               | 11.7   | 8.0    | -0.6 | 1.5 | 5.0E-05 |
| NM_001160302 | SYNJ1               | 4.3    | 3.0    | -0.6 | 1.5 | 2.0E-04 |
| NM_001137559 | ANAPC5              | 54.7   | 37.3   | -0.6 | 1.5 | 5.0E-05 |
| NM_000204    | CFI                 | 12.4   | 8.4    | -0.6 | 1.5 | 5.0E-05 |
| NM_014347    | ZNF324              | 6.8    | 4.7    | -0.6 | 1.5 | 5.0E-05 |
| NM_005996    | TBX3                | 3.6    | 2.5    | -0.6 | 1.5 | 5.0E-05 |
| NM_001042368 | RALGDS              | 8.7    | 5.9    | -0.5 | 1.5 | 5.0E-05 |
| NR_039985    | FLJ22447            | 20.7   | 14.1   | -0.5 | 1.5 | 5.0E-05 |
| NM_017622    | C17orf59            | 4.4    | 3.0    | -0.5 | 1.5 | 5.0E-05 |
| NR_040023    | ERVK13-1            | 1.8    | 1.2    | -0.5 | 1.5 | 5.0E-05 |
| NM_001158    | AOC2                | 55.8   | 38.2   | -0.5 | 1.5 | 5.0E-05 |
| NM_002593    | PCOLCE              | 8.0    | 5.4    | -0.5 | 1.5 | 5.0E-03 |
| NM_016453    | NCKIPSD             | 15.9   | 10.9   | -0.5 | 1.5 | 5.0E-05 |
| NM_203434    | IER5L               | 11.8   | 8.1    | -0.5 | 1.5 | 5.0E-05 |
| NM_001243027 | AKT2                | 23.2   | 15.9   | -0.5 | 1.5 | 5.0E-05 |
| NM_001098790 | MID1IP1             | 6.8    | 4.7    | -0.5 | 1.5 | 5.0E-05 |
| NM_002749    | MAPK7               | 12.9   | 8.8    | -0.5 | 1.5 | 5.5E-04 |
| NM_058190    | FAM207A             | 49.5   | 33.9   | -0.5 | 1.5 | 5.0E-05 |
| NM_004691    | ATP6V0D1            | 66.8   | 45.7   | -0.5 | 1.5 | 5.0E-05 |
| NM_001423    | EMP1                | 46.5   | 31.8   | -0.5 | 1.5 | 5.0E-05 |
| NM_004551    | NDUFS3              | 63.4   | 43.4   | -0.5 | 1.5 | 8.9E-03 |
| NM_004582    | RABGGTB             | 29.3   | 20.1   | -0.5 | 1.5 | 5.0E-05 |
| NM_001037806 | NCKAP5L             | 7.5    | 5.1    | -0.5 | 1.5 | 5.0E-05 |

|              |             |        |        |      |     |         |
|--------------|-------------|--------|--------|------|-----|---------|
| NM_003713    | PPAP2B      | 8.9    | 6.1    | -0.5 | 1.5 | 5.0E-05 |
| NM_001251902 | TNK1        | 3.9    | 2.7    | -0.5 | 1.5 | 7.0E-03 |
| NM_001193286 | SIRT2       | 14.1   | 9.7    | -0.5 | 1.5 | 5.0E-05 |
| NM_145806    | ZNF511PRAP1 | 34.0   | 23.3   | -0.5 | 1.5 | 1.9E-03 |
| NM_022104    | PCIF1       | 12.7   | 8.7    | -0.5 | 1.5 | 5.0E-05 |
| NM_001033714 | NOP2        | 94.4   | 64.7   | -0.5 | 1.5 | 5.0E-05 |
| NM_007361    | NID2        | 21.6   | 14.8   | -0.5 | 1.5 | 5.0E-05 |
| NM_001272073 | QARS        | 68.7   | 47.1   | -0.5 | 1.5 | 5.0E-05 |
| NM_024665    | TBL1XR1     | 18.4   | 12.6   | -0.5 | 1.5 | 5.0E-05 |
| NM_001243947 | PPP1R14A    | 3.8    | 2.6    | -0.5 | 1.5 | 1.5E-04 |
| NM_013376    | SERTAD1     | 23.9   | 16.4   | -0.5 | 1.5 | 5.0E-05 |
| NM_001258384 | IDH3B       | 68.1   | 46.7   | -0.5 | 1.5 | 1.0E-04 |
| NM_001162951 | SYTL2       | 5.2    | 3.6    | -0.5 | 1.5 | 5.0E-05 |
| NM_001609    | ACADSB      | 2.4    | 1.7    | -0.5 | 1.5 | 5.0E-05 |
| NM_001256539 | NOP16       | 42.9   | 29.5   | -0.5 | 1.5 | 5.0E-05 |
| NM_145047    | OSCP1       | 4.6    | 3.2    | -0.5 | 1.5 | 5.0E-05 |
| NM_002439    | MSH3        | 10.2   | 7.0    | -0.5 | 1.5 | 2.2E-02 |
| NM_001170543 | PGAM5       | 29.2   | 20.1   | -0.5 | 1.5 | 5.0E-05 |
| NM_004560    | ROR2        | 13.8   | 9.5    | -0.5 | 1.5 | 5.0E-05 |
| NM_005640    | TAF4B       | 1.9    | 1.3    | -0.5 | 1.5 | 5.0E-05 |
| NM_020412    | CHMP1B      | 19.4   | 13.4   | -0.5 | 1.5 | 5.0E-05 |
| NM_001977    | ENPEP       | 3.3    | 2.3    | -0.5 | 1.5 | 5.0E-05 |
| NM_005813    | PRKD3       | 15.9   | 11.0   | -0.5 | 1.5 | 5.0E-05 |
| NM_031299    | CDCA3       | 30.9   | 21.3   | -0.5 | 1.5 | 1.6E-02 |
| NM_198924    | TRIM73      | 8.8    | 6.0    | -0.5 | 1.5 | 1.2E-02 |
| NM_001092    | ABR         | 16.0   | 11.0   | -0.5 | 1.5 | 5.0E-05 |
| NM_001201459 | ZNF513      | 123.8  | 85.2   | -0.5 | 1.5 | 5.0E-05 |
| NM_001003941 | OGDH        | 21.8   | 15.0   | -0.5 | 1.5 | 5.0E-05 |
| NM_001128922 | LRRC32      | 3.4    | 2.3    | -0.5 | 1.5 | 5.0E-05 |
| NM_032429    | LZTS2       | 38.5   | 26.5   | -0.5 | 1.5 | 5.0E-05 |
| NM_003827    | NAPA        | 61.7   | 42.5   | -0.5 | 1.5 | 5.0E-05 |
| NM_006946    | SPTBN2      | 1.9    | 1.3    | -0.5 | 1.5 | 5.0E-05 |
| NM_002035    | KDSR        | 7.2    | 4.9    | -0.5 | 1.5 | 5.0E-05 |
| NM_152328    | ADSSL1      | 5.3    | 3.7    | -0.5 | 1.5 | 5.0E-05 |
| NM_001173466 | AAAS        | 31.2   | 21.5   | -0.5 | 1.5 | 5.0E-05 |
| NM_001024    | RPS21       | 1372.2 | 945.7  | -0.5 | 1.5 | 5.0E-05 |
| NM_000987    | RPL26       | 1688.3 | 1163.6 | -0.5 | 1.5 | 5.0E-05 |
| NM_001039659 | IL18BP      | 23.9   | 16.8   | -0.5 | 1.5 | 2.0E-02 |
| NM_001040160 | C16orf13    | 59.2   | 40.8   | -0.5 | 1.5 | 5.0E-05 |
| NM_022782    | MPHOSPH9    | 9.5    | 13.8   | 0.5  | 1.5 | 5.0E-05 |
| NM_001024215 | FBLIM1      | 40.3   | 58.4   | 0.5  | 1.5 | 5.0E-05 |
| NM_020244    | CHPT1       | 18.0   | 26.1   | 0.5  | 1.5 | 5.0E-05 |
| NM_004472    | FOXD1       | 32.4   | 47.0   | 0.5  | 1.5 | 5.0E-05 |
| NM_001190709 | COL11A1     | 24.1   | 35.0   | 0.5  | 1.5 | 5.0E-05 |
| NM_001005176 | SP140       | 9.9    | 14.4   | 0.5  | 1.5 | 5.0E-05 |
| NM_001136123 | FAM178A     | 11.9   | 17.2   | 0.5  | 1.5 | 5.0E-05 |
| NM_018352    | TMA16       | 14.9   | 21.7   | 0.5  | 1.5 | 5.0E-05 |
| NM_001145923 | SCAPER      | 1.5    | 2.2    | 0.5  | 1.5 | 5.0E-05 |
| NM_021109    | TMSB4X      | 1409.1 | 2048.7 | 0.5  | 1.5 | 5.0E-05 |
| NM_003102    | SOD3        | 3.2    | 4.6    | 0.5  | 1.5 | 5.0E-05 |
| NM_001002814 | RAB11FIP1   | 8.6    | 12.4   | 0.5  | 1.5 | 5.0E-05 |
| NM_005786    | TSHZ1       | 1.7    | 2.5    | 0.5  | 1.5 | 5.0E-05 |
| NM_005128    | DOPEY2      | 3.1    | 4.5    | 0.5  | 1.5 | 5.0E-05 |
| NM_001256619 | R3HCC1L     | 4.8    | 7.0    | 0.5  | 1.5 | 5.0E-05 |
| NM_001621    | AHR         | 5.6    | 8.1    | 0.5  | 1.5 | 5.0E-05 |
| NM_176877    | INADL       | 1.5    | 2.2    | 0.5  | 1.5 | 5.0E-05 |
| NM_001142651 | NEURL1B     | 2.8    | 4.0    | 0.5  | 1.5 | 5.0E-05 |
| NM_001145648 | RASGRF1     | 1.7    | 2.5    | 0.5  | 1.5 | 5.0E-05 |
| NM_001271314 | ZNF266      | 6.1    | 8.9    | 0.5  | 1.5 | 5.0E-05 |
| NM_014035    | SNX24       | 16.4   | 23.9   | 0.5  | 1.5 | 5.0E-05 |
| NM_001284251 | GUCD1       | 19.3   | 28.1   | 0.5  | 1.5 | 2.0E-04 |



|              |              |       |       |     |     |         |
|--------------|--------------|-------|-------|-----|-----|---------|
| NM_001271762 | DUS2L        | 7.4   | 10.8  | 0.5 | 1.5 | 5.0E-05 |
| NM_001130688 | HMGB2        | 183.7 | 267.6 | 0.5 | 1.5 | 5.0E-05 |
| NM_207517    | ADAMTSL3     | 1.7   | 2.4   | 0.5 | 1.5 | 5.0E-05 |
| NM_052854    | CREB3L1      | 18.1  | 26.4  | 0.5 | 1.5 | 5.0E-05 |
| NM_001276277 | PPIP5K2      | 7.1   | 10.3  | 0.5 | 1.5 | 5.0E-05 |
| NM_001007538 | SHISA2       | 12.9  | 18.8  | 0.5 | 1.5 | 5.0E-05 |
| NM_020728    | ESYT2        | 19.2  | 28.0  | 0.5 | 1.5 | 5.0E-05 |
| NM_207318    | FAM199X      | 14.5  | 21.1  | 0.5 | 1.5 | 1.6E-03 |
| NM_007282    | RNF13        | 11.9  | 17.4  | 0.5 | 1.5 | 5.0E-05 |
| NM_001681    | ATP2A2       | 64.9  | 94.7  | 0.5 | 1.5 | 5.0E-05 |
| NM_004458    | ACSL4        | 25.9  | 37.8  | 0.5 | 1.5 | 5.0E-05 |
| NM_133636    | HELQ         | 5.0   | 7.3   | 0.5 | 1.5 | 2.7E-03 |
| NM_001039651 | MSH5-SAPCD1  | 5.1   | 7.5   | 0.5 | 1.5 | 1.7E-02 |
| NR_033937    | LOC100132077 | 1.5   | 2.1   | 0.5 | 1.5 | 5.0E-05 |
| NM_001077686 | AGAP8        | 9.7   | 14.2  | 0.5 | 1.5 | 5.0E-05 |
| NM_001244871 | DAB2         | 15.3  | 22.3  | 0.5 | 1.5 | 5.0E-05 |
| NM_005077    | TLE1         | 4.7   | 6.8   | 0.5 | 1.5 | 5.0E-05 |
| NM_013943    | CLIC4        | 153.8 | 224.8 | 0.5 | 1.5 | 5.0E-05 |
| NM_001013836 | MAD1L1       | 10.5  | 15.4  | 0.5 | 1.5 | 5.0E-05 |
| NM_001258211 | FBXO16       | 1.5   | 2.2   | 0.5 | 1.5 | 2.5E-04 |
| NM_032656    | DHX37        | 6.4   | 9.3   | 0.5 | 1.5 | 5.0E-05 |
| NM_001097577 | ANG          | 3.1   | 4.6   | 0.5 | 1.5 | 5.0E-05 |
| NM_000356    | TCOF1        | 31.9  | 46.7  | 0.5 | 1.5 | 5.0E-05 |
| NM_001001992 | USP16        | 15.6  | 22.9  | 0.5 | 1.5 | 5.0E-05 |
| NM_001039467 | RGS19        | 5.8   | 8.4   | 0.5 | 1.5 | 5.0E-05 |
| NM_003824    | FADD         | 20.9  | 30.5  | 0.5 | 1.5 | 5.0E-05 |
| NM_001278604 | LARP1B       | 10.7  | 15.6  | 0.5 | 1.5 | 5.0E-05 |
| NM_001012644 | DUSP15       | 3.7   | 5.3   | 0.5 | 1.5 | 5.0E-05 |
| NM_005968    | HNRNPM       | 119.9 | 175.6 | 0.5 | 1.5 | 5.0E-05 |
| NM_001197026 | PLEKHA8      | 3.0   | 4.4   | 0.6 | 1.5 | 5.0E-05 |
| NM_004294    | MTRF1        | 2.9   | 4.3   | 0.6 | 1.5 | 4.0E-04 |
| NM_001145417 | MSL2         | 5.0   | 7.3   | 0.6 | 1.5 | 5.0E-05 |
| NM_014957    | DENND3       | 3.7   | 5.4   | 0.6 | 1.5 | 5.0E-05 |
| NM_004491    | ARHGAP35     | 13.6  | 19.9  | 0.6 | 1.5 | 5.0E-05 |
| NM_001170637 | SRGAP2       | 17.6  | 25.7  | 0.6 | 1.5 | 5.0E-05 |
| NR_103821    | EMC3-AS1     | 3.5   | 5.1   | 0.6 | 1.5 | 1.0E-04 |
| NR_040584    | STAG3L2      | 10.6  | 15.6  | 0.6 | 1.5 | 5.0E-05 |
| NM_033412    | SLC25A51     | 8.2   | 12.0  | 0.6 | 1.5 | 5.0E-05 |
| NM_001128148 | TFRC         | 65.9  | 96.6  | 0.6 | 1.5 | 5.0E-05 |
| NM_006734    | HIVEP2       | 3.6   | 5.2   | 0.6 | 1.5 | 5.0E-05 |
| NM_001007466 | TULP4        | 3.5   | 5.1   | 0.6 | 1.5 | 5.0E-05 |
| NM_030816    | ANKRD13C     | 8.7   | 12.8  | 0.6 | 1.5 | 5.0E-05 |
| NM_001204220 | ZNF670       | 5.9   | 8.7   | 0.6 | 1.5 | 5.0E-05 |
| NM_001099269 | ZNF506       | 1.5   | 2.2   | 0.6 | 1.5 | 2.6E-03 |
| NM_001195156 | ZMYM6NB      | 15.9  | 23.4  | 0.6 | 1.5 | 5.0E-05 |
| NM_001270528 | RNF111       | 6.1   | 9.0   | 0.6 | 1.5 | 5.0E-05 |
| NM_001136000 | ABL2         | 6.0   | 8.8   | 0.6 | 1.5 | 5.0E-05 |
| NM_024523    | GCC1         | 5.3   | 7.8   | 0.6 | 1.5 | 5.0E-05 |
| NM_001042383 | CEP63        | 5.2   | 7.7   | 0.6 | 1.5 | 5.5E-04 |
| NM_001284333 | TLK2         | 7.8   | 11.5  | 0.6 | 1.5 | 5.0E-05 |
| NM_001145028 | PALM3        | 1.6   | 2.4   | 0.6 | 1.5 | 5.0E-05 |
| NM_007034    | DNAJB4       | 26.7  | 39.3  | 0.6 | 1.5 | 9.5E-04 |
| NM_000249    | MLH1         | 21.6  | 31.7  | 0.6 | 1.5 | 5.0E-05 |
| NR_002594    | SLC7A5P2     | 2.1   | 3.0   | 0.6 | 1.5 | 3.5E-04 |
| NM_020772    | NUFIP2       | 19.2  | 28.3  | 0.6 | 1.5 | 5.0E-05 |
| NM_001008211 | OPTN         | 29.5  | 43.3  | 0.6 | 1.5 | 5.0E-05 |
| NM_001142560 | RRNAD1       | 2.4   | 3.5   | 0.6 | 1.5 | 2.1E-02 |
| NM_001199865 | KIF16B       | 2.5   | 3.7   | 0.6 | 1.5 | 5.0E-05 |
| NM_001010891 | MTX3         | 7.5   | 11.1  | 0.6 | 1.5 | 5.0E-05 |
| NM_145062    | ZUFSP        | 6.2   | 9.2   | 0.6 | 1.5 | 5.0E-05 |
| NM_001039690 | CHTF8        | 37.4  | 55.0  | 0.6 | 1.5 | 5.0E-05 |

|              |              |       |       |     |     |         |
|--------------|--------------|-------|-------|-----|-----|---------|
| NM_006373    | VAT1         | 52.5  | 77.2  | 0.6 | 1.5 | 5.0E-05 |
| NM_178314    | RILPL1       | 5.8   | 8.6   | 0.6 | 1.5 | 5.5E-04 |
| NM_001033583 | ACOT9        | 35.7  | 52.5  | 0.6 | 1.5 | 5.0E-05 |
| NM_001008485 | SLC41A3      | 13.3  | 19.6  | 0.6 | 1.5 | 5.0E-05 |
| NM_013240    | N6AMT1       | 5.2   | 7.6   | 0.6 | 1.5 | 5.0E-05 |
| NM_001130674 | CALU         | 101.7 | 149.9 | 0.6 | 1.5 | 5.0E-05 |
| NM_001253829 | PTPDC1       | 4.9   | 7.2   | 0.6 | 1.5 | 5.0E-05 |
| NM_174909    | TMEM167A     | 24.3  | 35.9  | 0.6 | 1.5 | 5.0E-05 |
| NM_001164315 | ANKRD36      | 1.6   | 2.4   | 0.6 | 1.5 | 5.0E-05 |
| NM_030939    | C6orf62      | 56.0  | 82.5  | 0.6 | 1.5 | 5.0E-05 |
| NM_002446    | MAP3K10      | 3.2   | 4.7   | 0.6 | 1.5 | 5.0E-05 |
| NM_001282428 | KCNS3        | 3.5   | 5.2   | 0.6 | 1.5 | 5.0E-05 |
| NM_001288962 | TRIP10       | 38.8  | 57.2  | 0.6 | 1.5 | 5.0E-05 |
| NM_020664    | DECR2        | 11.1  | 16.4  | 0.6 | 1.5 | 5.0E-05 |
| NM_001166425 | GNAI2        | 174.2 | 257.1 | 0.6 | 1.5 | 5.0E-05 |
| NM_024594    | PANK3        | 20.2  | 29.9  | 0.6 | 1.5 | 5.0E-05 |
| NM_015283    | DPY19L1      | 14.1  | 20.9  | 0.6 | 1.5 | 5.0E-05 |
| NM_001204426 | LIMK1        | 25.4  | 37.5  | 0.6 | 1.5 | 5.0E-05 |
| NR_029401    | LOC731275    | 2.0   | 2.9   | 0.6 | 1.5 | 5.0E-05 |
| NM_001145199 | C12orf75     | 104.6 | 154.7 | 0.6 | 1.5 | 5.0E-05 |
| NM_002890    | RASA1        | 14.2  | 20.9  | 0.6 | 1.5 | 5.0E-05 |
| NM_018050    | MANSC1       | 2.3   | 3.4   | 0.6 | 1.5 | 5.0E-05 |
| NR_027054    | MIR31HG      | 2.5   | 3.7   | 0.6 | 1.5 | 5.0E-05 |
| NM_001256876 | KANK1        | 4.2   | 6.2   | 0.6 | 1.5 | 5.0E-05 |
| NM_033127    | SEC16B       | 3.0   | 4.5   | 0.6 | 1.5 | 5.0E-05 |
| NM_005399    | PRKAB2       | 8.0   | 11.9  | 0.6 | 1.5 | 5.0E-05 |
| NM_001145548 | ZDHHC7       | 24.2  | 35.9  | 0.6 | 1.5 | 5.0E-05 |
| NM_018273    | TMEM143      | 2.8   | 4.2   | 0.6 | 1.5 | 5.0E-05 |
| NR_029408    | LOC439994    | 3.4   | 5.0   | 0.6 | 1.5 | 2.9E-03 |
| NM_018362    | LIN7C        | 8.3   | 12.3  | 0.6 | 1.5 | 5.0E-05 |
| NM_001271834 | RSRC1        | 11.9  | 17.6  | 0.6 | 1.5 | 5.0E-05 |
| NM_001080412 | ZBTB38       | 10.5  | 15.6  | 0.6 | 1.5 | 5.0E-05 |
| NM_001271783 | FAR2         | 1.7   | 2.5   | 0.6 | 1.5 | 1.6E-02 |
| NM_001271734 | COPZ1        | 57.0  | 84.5  | 0.6 | 1.5 | 5.0E-05 |
| NM_001545    | ICT1         | 22.4  | 33.2  | 0.6 | 1.5 | 5.0E-05 |
| NM_001284303 | TBC1D22A     | 6.0   | 8.9   | 0.6 | 1.5 | 5.0E-05 |
| NM_005313    | PDIA3        | 195.5 | 289.8 | 0.6 | 1.5 | 5.0E-05 |
| NM_001164189 | PLIN3        | 62.5  | 92.7  | 0.6 | 1.5 | 5.0E-05 |
| NM_001029835 | CCM2         | 20.6  | 30.6  | 0.6 | 1.5 | 5.0E-05 |
| NM_001142434 | MGEA5        | 46.2  | 68.6  | 0.6 | 1.5 | 5.0E-05 |
| NM_145049    | UBLCP1       | 12.1  | 17.9  | 0.6 | 1.5 | 5.0E-05 |
| NM_001024649 | CANX         | 253.4 | 376.4 | 0.6 | 1.5 | 5.0E-05 |
| NM_001080391 | SP100        | 13.1  | 19.5  | 0.6 | 1.5 | 5.0E-05 |
| NM_017672    | TRPM7        | 6.4   | 9.5   | 0.6 | 1.5 | 5.0E-05 |
| NM_001190447 | PPP2R3A      | 3.4   | 5.1   | 0.6 | 1.5 | 5.0E-05 |
| NM_001079539 | XBP1         | 48.2  | 71.6  | 0.6 | 1.5 | 5.0E-05 |
| NM_003455    | ZNF202       | 2.9   | 4.3   | 0.6 | 1.5 | 5.0E-05 |
| NM_006742    | PSKH1        | 7.0   | 10.4  | 0.6 | 1.5 | 5.0E-05 |
| NM_001172674 | ZNF347       | 2.5   | 3.7   | 0.6 | 1.5 | 5.0E-05 |
| NM_001008405 | BCAP29       | 9.5   | 14.2  | 0.6 | 1.5 | 5.0E-05 |
| NM_001043351 | TPM3         | 170.9 | 254.3 | 0.6 | 1.5 | 5.0E-05 |
| NM_021079    | NMT1         | 35.2  | 52.4  | 0.6 | 1.5 | 5.0E-05 |
| NM_001174159 | SH2D4A       | 11.2  | 16.7  | 0.6 | 1.5 | 5.0E-05 |
| NR_029407    | LOC642361    | 3.0   | 4.5   | 0.6 | 1.5 | 2.7E-02 |
| NM_001085411 | NADKD1       | 9.3   | 13.8  | 0.6 | 1.5 | 5.0E-05 |
| NR_109909    | CTC-338M12.4 | 2.9   | 4.3   | 0.6 | 1.5 | 1.2E-02 |
| NM_001137675 | ATXN1L       | 9.5   | 14.2  | 0.6 | 1.5 | 5.0E-05 |
| NM_052972    | LRG1         | 1.6   | 2.4   | 0.6 | 1.5 | 5.0E-05 |
| NM_001018116 | MURC         | 29.5  | 44.0  | 0.6 | 1.5 | 5.0E-05 |
| NM_016570    | ERGIC2       | 25.6  | 38.2  | 0.6 | 1.5 | 5.0E-05 |
| NM_032765    | TRIM52       | 3.4   | 5.1   | 0.6 | 1.5 | 1.0E-04 |

|              |           |       |       |     |     |         |
|--------------|-----------|-------|-------|-----|-----|---------|
| NM_015352    | POFUT1    | 20.4  | 30.4  | 0.6 | 1.5 | 5.0E-05 |
| NM_016350    | NIN       | 14.1  | 21.0  | 0.6 | 1.5 | 5.0E-05 |
| NM_003844    | TNFRSF10A | 3.3   | 5.0   | 0.6 | 1.5 | 5.0E-05 |
| NM_001271854 | GPR176    | 10.9  | 16.3  | 0.6 | 1.5 | 5.0E-05 |
| NM_001145446 | ZNF200    | 3.8   | 5.8   | 0.6 | 1.5 | 5.0E-05 |
| NM_021928    | SPCS3     | 43.8  | 65.4  | 0.6 | 1.5 | 5.0E-05 |
| NM_001184977 | UQCC      | 9.1   | 13.7  | 0.6 | 1.5 | 5.0E-05 |
| NM_001165966 | PITPNM3   | 3.5   | 5.2   | 0.6 | 1.5 | 5.0E-05 |
| NM_017649    | CNNM2     | 2.5   | 3.8   | 0.6 | 1.5 | 5.0E-05 |
| NM_017694    | MFSD6     | 2.4   | 3.5   | 0.6 | 1.5 | 5.0E-05 |
| NM_015697    | COQ2      | 19.2  | 28.7  | 0.6 | 1.5 | 5.0E-05 |
| NM_014423    | AFF4      | 27.0  | 40.4  | 0.6 | 1.5 | 5.0E-05 |
| NM_001661    | ARL4D     | 17.8  | 26.7  | 0.6 | 1.5 | 5.0E-05 |
| NM_000212    | ITGB3     | 19.3  | 28.8  | 0.6 | 1.5 | 5.0E-05 |
| NM_032492    | JAGN1     | 17.5  | 26.3  | 0.6 | 1.5 | 5.0E-05 |
| NM_015033    | FBNP1     | 6.4   | 9.6   | 0.6 | 1.5 | 5.0E-05 |
| NM_080836    | STK35     | 7.9   | 11.9  | 0.6 | 1.5 | 5.0E-05 |
| NM_006602    | TCFL5     | 10.4  | 15.6  | 0.6 | 1.5 | 5.0E-05 |
| NM_003009    | SEPW1     | 74.0  | 110.9 | 0.6 | 1.5 | 5.0E-05 |
| NM_001282495 | ZNF343    | 3.2   | 4.8   | 0.6 | 1.5 | 5.0E-05 |
| NM_001145721 | HOMER3    | 24.4  | 36.6  | 0.6 | 1.5 | 5.0E-05 |
| NM_003778    | B4GALT4   | 13.8  | 20.7  | 0.6 | 1.5 | 5.0E-05 |
| NM_001040157 | CEP44     | 4.0   | 6.1   | 0.6 | 1.5 | 5.0E-05 |
| NM_003566    | EEA1      | 4.5   | 6.7   | 0.6 | 1.5 | 5.0E-05 |
| NM_152504    | C20orf196 | 3.8   | 5.6   | 0.6 | 1.5 | 5.0E-05 |
| NM_001270520 | DAAM1     | 2.8   | 4.3   | 0.6 | 1.5 | 5.0E-05 |
| NM_001104587 | SLFN11    | 10.6  | 16.0  | 0.6 | 1.5 | 5.0E-05 |
| NM_001164811 | PET117    | 10.2  | 15.3  | 0.6 | 1.5 | 5.0E-05 |
| NM_213604    | ADAMTSL5  | 3.7   | 5.5   | 0.6 | 1.5 | 5.0E-05 |
| NM_006526    | ZNF217    | 9.7   | 14.6  | 0.6 | 1.5 | 5.0E-05 |
| NM_003370    | VASP      | 27.5  | 41.3  | 0.6 | 1.5 | 5.0E-05 |
| NM_001282142 | TFE3      | 15.4  | 23.1  | 0.6 | 1.5 | 5.0E-05 |
| NM_017846    | TRNAU1AP  | 10.6  | 16.0  | 0.6 | 1.5 | 5.0E-05 |
| NM_015898    | ZBTB7A    | 5.5   | 8.2   | 0.6 | 1.5 | 5.0E-05 |
| NM_139159    | DPP9      | 19.0  | 28.6  | 0.6 | 1.5 | 5.0E-05 |
| NM_022748    | TNS3      | 15.1  | 22.7  | 0.6 | 1.5 | 5.0E-05 |
| NM_001185063 | ZNF75D    | 2.5   | 3.7   | 0.6 | 1.5 | 5.0E-05 |
| NM_001943    | DSG2      | 23.9  | 35.9  | 0.6 | 1.5 | 5.0E-05 |
| NM_001042417 | RUFY2     | 6.8   | 10.2  | 0.6 | 1.5 | 2.1E-02 |
| NM_144492    | CLDN14    | 2.8   | 4.2   | 0.6 | 1.5 | 1.5E-04 |
| NM_015458    | MTMR9     | 5.9   | 8.9   | 0.6 | 1.5 | 5.0E-05 |
| NM_001170460 | CDK16     | 24.4  | 36.7  | 0.6 | 1.5 | 5.0E-05 |
| NM_001167882 | ANKRD50   | 5.1   | 7.7   | 0.6 | 1.5 | 5.0E-05 |
| NM_018676    | THSD1     | 4.3   | 6.4   | 0.6 | 1.5 | 5.0E-05 |
| NM_001144964 | NEDD4L    | 4.3   | 6.5   | 0.6 | 1.5 | 5.0E-05 |
| NM_175907    | ZADH2     | 2.6   | 3.9   | 0.6 | 1.5 | 5.0E-05 |
| NM_002702    | POU6F1    | 2.5   | 3.7   | 0.6 | 1.5 | 5.0E-05 |
| NM_001198953 | ZFYVE21   | 27.6  | 41.6  | 0.6 | 1.5 | 5.0E-05 |
| NM_001002762 | DNAJB12   | 18.4  | 27.7  | 0.6 | 1.5 | 5.0E-05 |
| NM_015960    | CUTC      | 11.3  | 17.1  | 0.6 | 1.5 | 1.5E-02 |
| NM_052852    | ZNF486    | 1.6   | 2.4   | 0.6 | 1.5 | 5.0E-05 |
| NM_182609    | ZNF677    | 2.2   | 3.4   | 0.6 | 1.5 | 5.0E-05 |
| NM_001142443 | EDC3      | 12.1  | 18.2  | 0.6 | 1.5 | 5.0E-05 |
| NM_006842    | SF3B2     | 54.0  | 81.4  | 0.6 | 1.5 | 5.0E-05 |
| NM_001201380 | CNTNAP3B  | 2.1   | 3.2   | 0.6 | 1.5 | 5.0E-05 |
| NM_004964    | HDAC1     | 65.1  | 98.2  | 0.6 | 1.5 | 5.0E-05 |
| NM_001068    | TOP2B     | 25.6  | 38.6  | 0.6 | 1.5 | 5.0E-05 |
| NM_001010924 | FAM171A1  | 7.7   | 11.6  | 0.6 | 1.5 | 5.0E-05 |
| NM_001146319 | GRAMD3    | 16.2  | 24.5  | 0.6 | 1.5 | 5.0E-05 |
| NM_001172435 | RAB3GAP1  | 14.2  | 21.4  | 0.6 | 1.5 | 5.0E-05 |
| NM_001540    | HSPB1     | 496.6 | 750.4 | 0.6 | 1.5 | 5.0E-05 |

|              |              |       |       |     |     |         |
|--------------|--------------|-------|-------|-----|-----|---------|
| NM_001101662 | NRD1         | 32.8  | 49.6  | 0.6 | 1.5 | 5.0E-05 |
| NM_017848    | FAM120C      | 2.9   | 4.4   | 0.6 | 1.5 | 6.5E-04 |
| NM_024582    | FAT4         | 2.1   | 3.2   | 0.6 | 1.5 | 5.0E-05 |
| NM_001012333 | MDK          | 154.7 | 233.9 | 0.6 | 1.5 | 5.0E-05 |
| NM_022100    | MRPS14       | 24.1  | 36.4  | 0.6 | 1.5 | 2.8E-02 |
| NM_015153    | PHF3         | 8.2   | 12.4  | 0.6 | 1.5 | 5.0E-05 |
| NM_144778    | MBNL2        | 16.1  | 24.3  | 0.6 | 1.5 | 5.0E-05 |
| NM_001122665 | DDX3Y        | 18.1  | 27.4  | 0.6 | 1.5 | 5.0E-05 |
| NM_001128301 | LYRM1        | 7.2   | 10.9  | 0.6 | 1.5 | 4.0E-04 |
| NM_001033604 | BBS9         | 2.4   | 3.6   | 0.6 | 1.5 | 5.0E-05 |
| NM_001271977 | STK25        | 44.9  | 67.9  | 0.6 | 1.5 | 5.0E-05 |
| NM_001282805 | MARCH7       | 25.9  | 39.3  | 0.6 | 1.5 | 5.0E-05 |
| NM_006558    | KHDRBS3      | 7.3   | 11.0  | 0.6 | 1.5 | 5.0E-05 |
| NM_016545    | IER5         | 13.6  | 20.6  | 0.6 | 1.5 | 5.0E-05 |
| NM_001039792 | HRCT1        | 2.4   | 3.7   | 0.6 | 1.5 | 5.0E-05 |
| NM_001204813 | NT5E         | 20.9  | 31.7  | 0.6 | 1.5 | 5.0E-05 |
| NM_001171201 | UBAP1        | 25.4  | 38.4  | 0.6 | 1.5 | 5.0E-05 |
| NM_033393    | FHDC1        | 3.1   | 4.7   | 0.6 | 1.5 | 5.0E-05 |
| NM_080627    | SOGA1        | 7.0   | 10.7  | 0.6 | 1.5 | 5.0E-05 |
| NR_029635    | MIR221       | 3.6   | 5.5   | 0.6 | 1.5 | 5.0E-05 |
| NM_001143676 | SGK1         | 42.0  | 63.7  | 0.6 | 1.5 | 5.0E-05 |
| NM_000208    | INSR         | 2.2   | 3.4   | 0.6 | 1.5 | 5.0E-05 |
| NM_001164431 | ARHGAP40     | 2.3   | 3.5   | 0.6 | 1.5 | 5.0E-05 |
| NM_000614    | CNTF         | 18.1  | 27.5  | 0.6 | 1.5 | 5.0E-05 |
| NM_022491    | SUDS3        | 7.0   | 10.6  | 0.6 | 1.5 | 5.0E-05 |
| NM_001136139 | TCF3         | 20.8  | 31.6  | 0.6 | 1.5 | 5.0E-05 |
| NM_080660    | ZC3HAV1L     | 6.5   | 9.9   | 0.6 | 1.5 | 5.0E-05 |
| NM_001199492 | PDCD4        | 15.7  | 23.9  | 0.6 | 1.5 | 5.0E-05 |
| NM_033211    | C5orf30      | 6.2   | 9.4   | 0.6 | 1.5 | 5.0E-05 |
| NM_014246    | CELSR1       | 16.2  | 24.5  | 0.6 | 1.5 | 5.0E-05 |
| NM_001675    | ATF4         | 121.6 | 184.6 | 0.6 | 1.5 | 5.0E-05 |
| NM_020524    | PBXIP1       | 16.3  | 24.7  | 0.6 | 1.5 | 5.0E-05 |
| NM_012088    | PGLS         | 36.2  | 55.0  | 0.6 | 1.5 | 5.0E-05 |
| NM_001003694 | BRPF1        | 7.2   | 10.9  | 0.6 | 1.5 | 5.0E-05 |
| NM_001270987 | LTBR         | 37.3  | 56.7  | 0.6 | 1.5 | 5.0E-05 |
| NM_001186    | BACH1        | 5.5   | 8.3   | 0.6 | 1.5 | 5.0E-05 |
| NM_144680    | ZNF18        | 2.0   | 3.1   | 0.6 | 1.5 | 5.0E-05 |
| NM_001334    | CTSO         | 3.4   | 5.2   | 0.6 | 1.5 | 5.0E-05 |
| NM_175884    | CCDC71L      | 2.9   | 4.4   | 0.6 | 1.5 | 5.0E-05 |
| NM_001142966 | GREB1L       | 1.6   | 2.4   | 0.6 | 1.5 | 5.0E-05 |
| NM_001005743 | NUMB         | 18.5  | 28.2  | 0.6 | 1.5 | 5.0E-05 |
| NM_030640    | DUSP16       | 3.2   | 4.9   | 0.6 | 1.5 | 5.0E-05 |
| NM_032427    | MAML2        | 3.4   | 5.1   | 0.6 | 1.5 | 5.0E-05 |
| NM_018283    | NUDT15       | 15.7  | 23.9  | 0.6 | 1.5 | 5.0E-05 |
| NM_001255976 | PMEP1        | 44.7  | 68.1  | 0.6 | 1.5 | 5.0E-05 |
| NM_001110503 | TMEM87A      | 18.0  | 27.5  | 0.6 | 1.5 | 5.0E-05 |
| NM_001080471 | PEAR1        | 5.6   | 8.5   | 0.6 | 1.5 | 5.0E-05 |
| NM_001010989 | HERPUD1      | 23.9  | 36.4  | 0.6 | 1.5 | 5.0E-05 |
| NM_000286    | PEX12        | 2.6   | 4.0   | 0.6 | 1.5 | 5.0E-05 |
| NM_005735    | ACTR1B       | 15.2  | 23.1  | 0.6 | 1.5 | 5.0E-05 |
| NR_033908    | LOC100288069 | 5.8   | 8.9   | 0.6 | 1.5 | 5.0E-05 |
| NM_016644    | PRR16        | 2.3   | 3.6   | 0.6 | 1.5 | 5.0E-05 |
| NM_024640    | YRDC         | 13.4  | 20.4  | 0.6 | 1.5 | 5.0E-05 |
| NM_152284    | CHMP4C       | 2.1   | 3.2   | 0.6 | 1.5 | 5.0E-05 |
| NM_001130101 | NR1H3        | 5.4   | 8.2   | 0.6 | 1.5 | 6.6E-03 |
| NM_001284245 | SIPA1L1      | 12.0  | 18.3  | 0.6 | 1.5 | 5.0E-05 |
| NM_001002759 | SFR1         | 3.8   | 5.8   | 0.6 | 1.5 | 5.0E-05 |
| NM_001242844 | RNF146       | 9.2   | 14.1  | 0.6 | 1.5 | 2.0E-04 |
| NM_012327    | PIGN         | 6.0   | 9.2   | 0.6 | 1.5 | 5.0E-05 |
| NM_022465    | IKZF4        | 1.7   | 2.5   | 0.6 | 1.5 | 5.0E-05 |
| NM_001048249 | SMIM15       | 21.9  | 33.5  | 0.6 | 1.5 | 5.0E-05 |

|              |              |      |       |     |     |         |
|--------------|--------------|------|-------|-----|-----|---------|
| NM_031283    | TCF7L1       | 5.3  | 8.1   | 0.6 | 1.5 | 5.0E-05 |
| NM_006379    | SEMA3C       | 12.1 | 18.5  | 0.6 | 1.5 | 5.0E-05 |
| NM_016231    | NLK          | 6.0  | 9.2   | 0.6 | 1.5 | 5.0E-05 |
| NM_020820    | PREX1        | 3.3  | 5.1   | 0.6 | 1.5 | 5.0E-05 |
| NM_030645    | SH3BP5L      | 14.9 | 22.7  | 0.6 | 1.5 | 5.0E-05 |
| NM_006342    | TACC3        | 45.7 | 69.8  | 0.6 | 1.5 | 5.0E-05 |
| NM_001013415 | FBXW7        | 6.9  | 10.6  | 0.6 | 1.5 | 5.0E-05 |
| NM_003677    | DENR         | 24.4 | 37.4  | 0.6 | 1.5 | 5.0E-05 |
| NM_004227    | CYTH3        | 10.4 | 16.0  | 0.6 | 1.5 | 5.0E-05 |
| NM_003885    | CDK5R1       | 2.7  | 4.1   | 0.6 | 1.5 | 5.0E-05 |
| NM_032509    | MAK16        | 9.9  | 15.2  | 0.6 | 1.5 | 5.0E-05 |
| NR_028379    | FTX          | 2.8  | 4.2   | 0.6 | 1.5 | 5.0E-05 |
| NM_001282750 | SUCO         | 15.9 | 24.4  | 0.6 | 1.5 | 5.0E-05 |
| NM_022831    | AIDA         | 45.8 | 70.6  | 0.6 | 1.5 | 5.0E-05 |
| NM_000540    | RYR1         | 1.8  | 2.7   | 0.6 | 1.5 | 5.0E-05 |
| NM_001178040 | STX3         | 8.1  | 12.4  | 0.6 | 1.5 | 5.0E-05 |
| NM_032336    | GIN54        | 15.5 | 23.7  | 0.6 | 1.5 | 5.0E-05 |
| NR_026052    | MGC2752      | 5.2  | 8.0   | 0.6 | 1.5 | 5.0E-05 |
| NM_001172702 | SLC38A6      | 4.0  | 6.1   | 0.6 | 1.5 | 1.2E-03 |
| NM_001281441 | WBSCR16      | 16.8 | 25.8  | 0.6 | 1.5 | 5.0E-05 |
| NM_001256339 | NKX3-1       | 2.8  | 4.3   | 0.6 | 1.5 | 5.0E-05 |
| NM_000165    | GJA1         | 34.6 | 53.1  | 0.6 | 1.5 | 5.0E-05 |
| NM_173084    | TRIM59       | 10.3 | 15.8  | 0.6 | 1.5 | 5.0E-05 |
| NM_001252129 | LSM4         | 37.8 | 58.0  | 0.6 | 1.5 | 5.0E-05 |
| NM_001024596 | ZNF772       | 1.8  | 2.7   | 0.6 | 1.5 | 5.0E-05 |
| NM_001079812 | DIAPH1       | 39.6 | 60.8  | 0.6 | 1.5 | 5.0E-05 |
| NM_006996    | SLC19A2      | 12.6 | 19.4  | 0.6 | 1.5 | 5.0E-05 |
| NM_004850    | ROCK2        | 14.0 | 21.5  | 0.6 | 1.5 | 5.0E-05 |
| NM_002840    | PTPRF        | 51.9 | 79.8  | 0.6 | 1.5 | 5.0E-05 |
| NM_019022    | TMX3         | 10.7 | 16.5  | 0.6 | 1.5 | 5.0E-05 |
| NM_019043    | APBB1IP      | 2.1  | 3.3   | 0.6 | 1.5 | 5.0E-05 |
| NM_001160354 | LY6K         | 5.6  | 8.7   | 0.6 | 1.5 | 6.5E-04 |
| NM_001184992 | RNF135       | 5.0  | 7.6   | 0.6 | 1.5 | 5.0E-05 |
| NM_001010880 | ZNF780A      | 2.9  | 4.5   | 0.6 | 1.5 | 5.0E-05 |
| NM_006289    | TLN1         | 70.5 | 108.5 | 0.6 | 1.5 | 5.0E-05 |
| NM_001039675 | UNC45A       | 21.6 | 33.3  | 0.6 | 1.5 | 5.0E-05 |
| NM_001173479 | ARHGEF9      | 4.1  | 6.3   | 0.6 | 1.5 | 5.0E-05 |
| NM_145011    | ZNF25        | 1.5  | 2.3   | 0.6 | 1.5 | 5.0E-05 |
| NM_022758    | C6orf106     | 19.4 | 29.9  | 0.6 | 1.5 | 5.0E-05 |
| NM_001287385 | FAM72C       | 5.6  | 8.6   | 0.6 | 1.5 | 5.0E-05 |
| NR_015353    | LOC92249     | 4.6  | 7.1   | 0.6 | 1.5 | 5.0E-05 |
| NM_001191028 | TNPO3        | 17.5 | 27.0  | 0.6 | 1.5 | 5.0E-05 |
| NM_000946    | PRIM1        | 15.5 | 23.9  | 0.6 | 1.5 | 5.0E-05 |
| NM_001035230 | RABGAP1L     | 4.1  | 6.4   | 0.6 | 1.5 | 5.0E-05 |
| NM_173674    | DCBLD1       | 13.2 | 20.3  | 0.6 | 1.5 | 5.0E-05 |
| NM_001030055 | ARHGAP5      | 10.1 | 15.6  | 0.6 | 1.5 | 5.0E-05 |
| NM_016436    | PHF20        | 10.5 | 16.2  | 0.6 | 1.5 | 5.0E-05 |
| NM_139178    | ALKBH3       | 7.9  | 12.1  | 0.6 | 1.5 | 5.0E-05 |
| NM_173637    | SLC25A41     | 1.5  | 2.3   | 0.6 | 1.5 | 4.5E-03 |
| NM_145063    | OARD1        | 9.1  | 14.1  | 0.6 | 1.5 | 1.2E-03 |
| NM_006743    | RBM3         | 60.5 | 93.4  | 0.6 | 1.5 | 5.0E-05 |
| NM_001792    | CDH2         | 54.7 | 84.5  | 0.6 | 1.5 | 5.0E-05 |
| NM_024942    | C10orf88     | 3.9  | 6.0   | 0.6 | 1.5 | 5.0E-05 |
| NM_001135768 | PVR          | 33.4 | 51.6  | 0.6 | 1.5 | 5.0E-05 |
| NM_181705    | LYRM7        | 3.3  | 5.1   | 0.6 | 1.5 | 5.0E-05 |
| NM_001284413 | HACL1        | 8.5  | 13.1  | 0.6 | 1.5 | 5.0E-05 |
| NM_001071775 | MZT1         | 14.6 | 22.7  | 0.6 | 1.5 | 1.5E-04 |
| NM_145266    | NUDCD2       | 25.5 | 39.4  | 0.6 | 1.5 | 5.0E-05 |
| NM_001243466 | STARD13      | 4.8  | 7.5   | 0.6 | 1.5 | 5.0E-05 |
| NM_001267580 | PRC1         | 67.0 | 103.8 | 0.6 | 1.5 | 5.0E-05 |
| NR_102759    | LOC100507602 | 5.6  | 8.7   | 0.6 | 1.5 | 2.7E-02 |

|              |          |       |       |     |     |         |
|--------------|----------|-------|-------|-----|-----|---------|
| NM_000786    | CYP51A1  | 31.8  | 49.3  | 0.6 | 1.5 | 5.0E-05 |
| NM_001003792 | RBMS3    | 5.7   | 8.9   | 0.6 | 1.5 | 5.0E-05 |
| NM_001256264 | FLII     | 33.9  | 52.6  | 0.6 | 1.5 | 5.0E-05 |
| NM_017761    | PNRC2    | 53.1  | 82.3  | 0.6 | 1.6 | 5.0E-05 |
| NM_000462    | UBE3A    | 12.8  | 19.9  | 0.6 | 1.6 | 5.0E-05 |
| NM_001135733 | TP53INP1 | 4.1   | 6.4   | 0.6 | 1.6 | 5.0E-05 |
| NM_001040260 | DCLK2    | 4.4   | 6.8   | 0.6 | 1.6 | 5.0E-05 |
| NM_000875    | IGF1R    | 13.9  | 21.6  | 0.6 | 1.6 | 5.0E-05 |
| NM_001085423 | MILR1    | 3.7   | 5.7   | 0.6 | 1.6 | 2.2E-03 |
| NM_144689    | ZNF420   | 1.7   | 2.7   | 0.6 | 1.6 | 5.0E-05 |
| NM_024620    | ZNF329   | 2.5   | 3.9   | 0.6 | 1.6 | 5.0E-05 |
| NM_032015    | RNF26    | 33.3  | 51.7  | 0.6 | 1.6 | 5.0E-05 |
| NR_027107    | MGC45800 | 1.8   | 2.8   | 0.6 | 1.6 | 2.7E-02 |
| NM_001253861 | MND1     | 8.0   | 12.4  | 0.6 | 1.6 | 5.0E-05 |
| NM_001099653 | FAM86C1  | 2.0   | 3.1   | 0.6 | 1.6 | 5.0E-05 |
| NM_006236    | POU3F3   | 15.5  | 24.0  | 0.6 | 1.6 | 5.0E-05 |
| NM_019050    | USP53    | 2.6   | 4.1   | 0.6 | 1.6 | 5.0E-05 |
| NM_001013649 | C2orf68  | 3.3   | 5.1   | 0.6 | 1.6 | 5.0E-04 |
| NM_001193360 | EXD2     | 3.5   | 5.5   | 0.6 | 1.6 | 5.0E-05 |
| NM_001207000 | HNRPDL   | 47.8  | 74.4  | 0.6 | 1.6 | 5.0E-05 |
| NM_170606    | KMT2C    | 4.3   | 6.7   | 0.6 | 1.6 | 5.0E-05 |
| NM_001270639 | JOSD2    | 17.3  | 26.9  | 0.6 | 1.6 | 5.0E-05 |
| NM_001145769 | XPC      | 10.6  | 16.5  | 0.6 | 1.6 | 5.0E-05 |
| NM_001203250 | ZNF20    | 3.8   | 5.9   | 0.6 | 1.6 | 5.0E-05 |
| NM_015836    | WARS2    | 2.5   | 3.9   | 0.6 | 1.6 | 5.0E-05 |
| NM_018429    | BDP1     | 7.8   | 12.1  | 0.6 | 1.6 | 5.0E-05 |
| NM_001009813 | MEIS3    | 6.3   | 9.8   | 0.6 | 1.6 | 5.0E-05 |
| NM_001278610 | MYBL2    | 88.3  | 137.5 | 0.6 | 1.6 | 5.0E-05 |
| NM_001289088 | ZMYM1    | 6.4   | 9.9   | 0.6 | 1.6 | 5.0E-05 |
| NM_001130475 | THAP5    | 5.6   | 8.8   | 0.6 | 1.6 | 5.0E-05 |
| NM_005438    | FOSL1    | 24.6  | 38.4  | 0.6 | 1.6 | 5.0E-05 |
| NM_001242377 | DCP2     | 9.0   | 14.1  | 0.6 | 1.6 | 5.0E-05 |
| NM_001195071 | TMEM184B | 31.6  | 49.2  | 0.6 | 1.6 | 5.0E-05 |
| NM_001244698 | ZFP36L1  | 55.9  | 87.1  | 0.6 | 1.6 | 5.0E-05 |
| NM_005109    | OXSRI    | 19.2  | 30.0  | 0.6 | 1.6 | 5.0E-05 |
| NM_016531    | KLF3     | 6.4   | 10.0  | 0.6 | 1.6 | 5.0E-05 |
| NM_002901    | RCN1     | 153.3 | 239.2 | 0.6 | 1.6 | 5.0E-05 |
| NM_145305    | SLC25A43 | 7.7   | 11.9  | 0.6 | 1.6 | 5.0E-05 |
| NM_139241    | FGD4     | 2.9   | 4.5   | 0.6 | 1.6 | 5.0E-05 |
| NM_144982    | ZFC3H1   | 7.7   | 12.1  | 0.6 | 1.6 | 5.0E-05 |
| NM_001164446 | C6orf132 | 4.7   | 7.4   | 0.6 | 1.6 | 5.0E-05 |
| NM_001199297 | UIMC1    | 11.3  | 17.7  | 0.6 | 1.6 | 5.0E-05 |
| NM_003405    | YWHAH    | 100.3 | 156.8 | 0.6 | 1.6 | 5.0E-05 |
| NM_001287532 | ZNF92    | 1.8   | 2.8   | 0.6 | 1.6 | 5.0E-05 |
| NM_033034    | TRIM5    | 4.0   | 6.3   | 0.6 | 1.6 | 5.0E-05 |
| NM_002577    | PAK2     | 24.8  | 38.8  | 0.6 | 1.6 | 5.0E-05 |
| NM_001243186 | PIM1     | 5.0   | 7.8   | 0.6 | 1.6 | 5.0E-05 |
| NM_001127190 | CSK      | 17.0  | 26.5  | 0.6 | 1.6 | 5.0E-05 |
| NR_045680    | HEIH     | 5.3   | 8.2   | 0.6 | 1.6 | 5.0E-05 |
| NM_001178075 | ASNS     | 13.0  | 20.3  | 0.6 | 1.6 | 5.0E-05 |
| NM_001168355 | OSMR     | 48.3  | 75.7  | 0.6 | 1.6 | 5.0E-05 |
| NM_001145391 | OXSM     | 5.3   | 8.3   | 0.6 | 1.6 | 5.5E-04 |
| NM_001135669 | XPR1     | 4.6   | 7.2   | 0.6 | 1.6 | 5.0E-05 |
| NM_032582    | USP32    | 6.8   | 10.7  | 0.6 | 1.6 | 5.0E-05 |
| NM_004808    | NMT2     | 10.4  | 16.3  | 0.6 | 1.6 | 5.0E-05 |
| NM_033428    | C9orf123 | 14.3  | 22.4  | 0.6 | 1.6 | 5.0E-05 |
| NM_001276722 | C11orf74 | 11.5  | 18.1  | 0.6 | 1.6 | 5.0E-05 |
| NM_006763    | BTG2     | 3.5   | 5.6   | 0.6 | 1.6 | 5.0E-05 |
| NM_001040450 | FAM63B   | 3.7   | 5.8   | 0.6 | 1.6 | 5.0E-05 |
| NM_001243797 | TSC22D1  | 13.4  | 21.1  | 0.6 | 1.6 | 5.0E-05 |
| NM_032211    | LOXL4    | 3.2   | 5.0   | 0.7 | 1.6 | 5.0E-05 |

|                    |           |       |       |     |     |         |
|--------------------|-----------|-------|-------|-----|-----|---------|
| NM_000235          | LIPA      | 16.3  | 25.6  | 0.7 | 1.6 | 5.0E-05 |
| NM_001278510       | ZNF229    | 1.7   | 2.7   | 0.7 | 1.6 | 5.0E-05 |
| NM_020894          | UVSSA     | 2.1   | 3.3   | 0.7 | 1.6 | 4.2E-03 |
| NM_017510          | TMED9     | 236.0 | 370.7 | 0.7 | 1.6 | 5.0E-05 |
| NM_006988          | ADAMTS1   | 8.2   | 12.8  | 0.7 | 1.6 | 5.0E-05 |
| NM_001083625       | ANKRD12   | 3.4   | 5.4   | 0.7 | 1.6 | 5.0E-05 |
| NM_001037164       | ARL4A     | 4.1   | 6.4   | 0.7 | 1.6 | 5.0E-05 |
| NM_018976          | SLC38A2   | 49.6  | 78.0  | 0.7 | 1.6 | 5.0E-05 |
| NM_178169          | RASSF3    | 8.6   | 13.6  | 0.7 | 1.6 | 5.0E-05 |
| NM_015055          | SWAP70    | 14.4  | 22.7  | 0.7 | 1.6 | 5.0E-05 |
| NM_005611          | RBL2      | 11.0  | 17.3  | 0.7 | 1.6 | 5.0E-05 |
| NM_001206994       | PPP2R2C   | 4.1   | 6.4   | 0.7 | 1.6 | 5.0E-05 |
| NM_001098845       | ANXA8     | 13.1  | 20.6  | 0.7 | 1.6 | 7.0E-04 |
| NM_001276479       | LONP1     | 29.0  | 45.6  | 0.7 | 1.6 | 5.0E-05 |
| NM_001105549,77945 | ZNF83     | 14.0  | 22.0  | 0.7 | 1.6 | 5.0E-05 |
| NM_002410          | MGAT5     | 6.8   | 10.7  | 0.7 | 1.6 | 5.0E-05 |
| NM_020935          | USP37     | 3.5   | 5.5   | 0.7 | 1.6 | 5.0E-05 |
| NM_018453          | EAPP      | 15.4  | 24.2  | 0.7 | 1.6 | 5.0E-05 |
| NM_001270584       | IQCA1     | 2.9   | 4.5   | 0.7 | 1.6 | 5.0E-05 |
| NM_012434          | SLC17A5   | 4.2   | 6.6   | 0.7 | 1.6 | 5.0E-05 |
| NM_152678          | DENND6A   | 5.4   | 8.5   | 0.7 | 1.6 | 5.0E-05 |
| NM_138383          | MTSS1L    | 13.9  | 22.0  | 0.7 | 1.6 | 5.0E-05 |
| NM_004907          | IER2      | 13.1  | 20.7  | 0.7 | 1.6 | 5.0E-05 |
| NM_001130963       | TMEM194A  | 19.1  | 30.2  | 0.7 | 1.6 | 5.0E-05 |
| NM_001143941       | RBM24     | 3.1   | 4.9   | 0.7 | 1.6 | 5.0E-05 |
| NM_012388          | BLOC1S6   | 10.3  | 16.2  | 0.7 | 1.6 | 5.0E-05 |
| NM_015974          | CRYL1     | 1.9   | 3.1   | 0.7 | 1.6 | 5.0E-05 |
| NM_152387          | KCTD18    | 3.8   | 6.0   | 0.7 | 1.6 | 6.5E-04 |
| NR_003505          | PPP4R1L   | 2.5   | 3.9   | 0.7 | 1.6 | 5.0E-05 |
| NM_001040134       | PALM      | 13.7  | 21.6  | 0.7 | 1.6 | 5.0E-05 |
| NR_028502          | MIR22HG   | 13.7  | 21.7  | 0.7 | 1.6 | 5.0E-05 |
| NM_001005368       | ZNF32     | 8.0   | 12.6  | 0.7 | 1.6 | 5.0E-05 |
| NM_015286          | SYNM      | 2.4   | 3.7   | 0.7 | 1.6 | 5.0E-05 |
| NM_147156          | SGMS1     | 6.2   | 9.9   | 0.7 | 1.6 | 5.0E-05 |
| NM_001100412       | DROSHA    | 14.8  | 23.4  | 0.7 | 1.6 | 5.0E-05 |
| NM_001258217       | MIS12     | 11.9  | 18.9  | 0.7 | 1.6 | 5.0E-05 |
| NM_006062          | SMYD5     | 11.7  | 18.5  | 0.7 | 1.6 | 5.0E-05 |
| NM_001265588       | ZNF267    | 3.1   | 4.9   | 0.7 | 1.6 | 5.0E-05 |
| NM_178821          | DAW1      | 7.3   | 11.6  | 0.7 | 1.6 | 5.0E-05 |
| NM_003487          | TAF15     | 62.6  | 99.3  | 0.7 | 1.6 | 5.0E-05 |
| NM_005358          | LMO7      | 5.8   | 9.2   | 0.7 | 1.6 | 5.0E-05 |
| NM_004947          | DOCK3     | 109.8 | 174.1 | 0.7 | 1.6 | 5.0E-05 |
| NR_034105          | CRNDE     | 6.3   | 9.9   | 0.7 | 1.6 | 5.0E-05 |
| NM_005544          | IRS1      | 15.9  | 25.3  | 0.7 | 1.6 | 5.0E-05 |
| NM_004376          | COX15     | 6.8   | 10.8  | 0.7 | 1.6 | 5.0E-05 |
| NM_033540          | MFN1      | 8.5   | 13.5  | 0.7 | 1.6 | 5.0E-05 |
| NM_080725          | SRXN1     | 23.8  | 37.8  | 0.7 | 1.6 | 5.0E-05 |
| NM_001254740       | SLC24A1   | 1.5   | 2.4   | 0.7 | 1.6 | 5.0E-05 |
| NM_003768          | PEA15     | 103.1 | 164.0 | 0.7 | 1.6 | 5.0E-05 |
| NM_001178002       | ATP8B3    | 2.0   | 3.3   | 0.7 | 1.6 | 5.0E-05 |
| NM_001145432       | SMIM20    | 13.0  | 20.6  | 0.7 | 1.6 | 5.0E-05 |
| NM_144508          | CASC5     | 8.0   | 12.7  | 0.7 | 1.6 | 5.0E-05 |
| NM_012325          | MAPRE1    | 109.8 | 175.0 | 0.7 | 1.6 | 5.0E-05 |
| NM_001270726       | BCL2L13   | 7.8   | 12.4  | 0.7 | 1.6 | 5.0E-05 |
| NM_001252226       | PLK2      | 57.9  | 92.3  | 0.7 | 1.6 | 5.0E-05 |
| NM_001270539       | PEX11G    | 1.6   | 2.6   | 0.7 | 1.6 | 5.0E-05 |
| NR_037875          | LOC728730 | 3.0   | 4.7   | 0.7 | 1.6 | 1.7E-03 |
| NM_002898          | RBMS2     | 7.4   | 11.8  | 0.7 | 1.6 | 5.0E-05 |
| NM_001145434       | ZNF880    | 3.9   | 6.2   | 0.7 | 1.6 | 6.5E-04 |
| NM_001017395       | TMCC1     | 5.6   | 8.9   | 0.7 | 1.6 | 5.0E-05 |
| NM_001031725       | DDX59     | 3.6   | 5.8   | 0.7 | 1.6 | 5.0E-05 |

|              |            |       |       |     |     |         |
|--------------|------------|-------|-------|-----|-----|---------|
| NM_032840    | SPRYD3     | 8.6   | 13.8  | 0.7 | 1.6 | 5.0E-05 |
| NM_012198    | GCA        | 4.1   | 6.6   | 0.7 | 1.6 | 5.0E-05 |
| NM_138400    | NOM1       | 9.0   | 14.4  | 0.7 | 1.6 | 5.0E-05 |
| NM_003816    | ADAM9      | 176.3 | 281.7 | 0.7 | 1.6 | 5.0E-05 |
| NM_001012329 | CTNNBIP1   | 3.9   | 6.2   | 0.7 | 1.6 | 5.0E-05 |
| NM_012242    | DKK1       | 26.3  | 42.1  | 0.7 | 1.6 | 5.0E-05 |
| NM_016053    | CCDC53     | 15.3  | 24.4  | 0.7 | 1.6 | 5.0E-05 |
| NM_001161546 | PROB1      | 4.0   | 6.4   | 0.7 | 1.6 | 5.0E-05 |
| NM_001034841 | ITPRIPL2   | 6.3   | 10.0  | 0.7 | 1.6 | 5.0E-05 |
| NM_001033569 | AMZ2       | 24.6  | 39.4  | 0.7 | 1.6 | 5.0E-05 |
| NM_001040000 | MLLT4      | 8.9   | 14.3  | 0.7 | 1.6 | 5.0E-05 |
| NM_001177475 | MOSPD2     | 5.4   | 8.7   | 0.7 | 1.6 | 5.0E-05 |
| NM_031215    | CABLES2    | 2.3   | 3.7   | 0.7 | 1.6 | 5.0E-05 |
| NM_006825    | CKAP4      | 69.4  | 111.3 | 0.7 | 1.6 | 5.0E-05 |
| NM_001278211 | LRRC20     | 7.5   | 12.0  | 0.7 | 1.6 | 5.0E-05 |
| NM_007008    | RTN4       | 204.1 | 327.2 | 0.7 | 1.6 | 5.0E-05 |
| NM_001145542 | ZSCAN18    | 6.4   | 10.3  | 0.7 | 1.6 | 5.0E-05 |
| NM_138493    | CCDC167    | 18.2  | 29.2  | 0.7 | 1.6 | 5.0E-05 |
| NM_001011655 | TMEM44     | 15.6  | 25.1  | 0.7 | 1.6 | 5.0E-05 |
| NM_001127487 | FLNC       | 41.0  | 65.8  | 0.7 | 1.6 | 5.0E-05 |
| NM_080607    | VSTM2L     | 1.6   | 2.5   | 0.7 | 1.6 | 5.0E-05 |
| NM_033114    | ZCRB1      | 16.7  | 26.7  | 0.7 | 1.6 | 5.0E-05 |
| NM_017919    | STX17      | 4.1   | 6.7   | 0.7 | 1.6 | 1.0E-04 |
| NM_001286617 | MAP3K7CL   | 4.8   | 7.8   | 0.7 | 1.6 | 5.0E-05 |
| NM_017946    | FKBP14     | 4.5   | 7.2   | 0.7 | 1.6 | 5.0E-05 |
| NM_017425    | SPA17      | 8.6   | 13.9  | 0.7 | 1.6 | 1.2E-03 |
| NM_007111    | TFDP1      | 65.0  | 104.6 | 0.7 | 1.6 | 5.0E-05 |
| NM_001287054 | ZKSCAN1    | 3.9   | 6.2   | 0.7 | 1.6 | 5.0E-05 |
| NM_001284301 | ANLN       | 76.7  | 123.5 | 0.7 | 1.6 | 5.0E-05 |
| NM_001170796 | ZFAND1     | 12.0  | 19.4  | 0.7 | 1.6 | 2.0E-04 |
| NM_020870    | SH3RF1     | 6.0   | 9.6   | 0.7 | 1.6 | 5.0E-05 |
| NM_004278    | PIGL       | 4.4   | 7.0   | 0.7 | 1.6 | 5.0E-05 |
| NR_003108    | NBR2       | 2.5   | 4.0   | 0.7 | 1.6 | 5.0E-05 |
| NM_000393    | COL5A2     | 14.6  | 23.5  | 0.7 | 1.6 | 5.0E-05 |
| NM_020702    | KIAA1161   | 5.5   | 8.9   | 0.7 | 1.6 | 5.0E-05 |
| NM_001085049 | MRAS       | 5.6   | 9.0   | 0.7 | 1.6 | 5.0E-05 |
| NR_109992    | SUCLG2-AS1 | 3.0   | 4.8   | 0.7 | 1.6 | 1.0E-04 |
| NM_001135821 | FDPS       | 79.8  | 128.6 | 0.7 | 1.6 | 5.0E-05 |
| NM_001024660 | KALRN      | 2.7   | 4.4   | 0.7 | 1.6 | 5.0E-05 |
| NM_006943    | SOX12      | 5.9   | 9.5   | 0.7 | 1.6 | 5.0E-05 |
| NM_152522    | ARL6IP6    | 14.0  | 22.6  | 0.7 | 1.6 | 1.4E-03 |
| NM_030940    | ISCA1      | 10.5  | 17.0  | 0.7 | 1.6 | 5.0E-05 |
| NM_001014380 | KATNAL1    | 5.3   | 8.6   | 0.7 | 1.6 | 5.0E-05 |
| NM_001142393 | NEDD9      | 9.1   | 14.6  | 0.7 | 1.6 | 5.0E-05 |
| NM_001226    | CASP6      | 9.5   | 15.4  | 0.7 | 1.6 | 5.0E-05 |
| NM_018268    | WDR41      | 12.9  | 20.9  | 0.7 | 1.6 | 5.0E-05 |
| NM_001172677 | ZNF607     | 1.6   | 2.7   | 0.7 | 1.6 | 5.0E-05 |
| NM_001145306 | CDK6       | 11.4  | 18.5  | 0.7 | 1.6 | 5.0E-05 |
| NM_001040633 | PRKAG2     | 17.6  | 28.5  | 0.7 | 1.6 | 5.0E-05 |
| NM_022373    | HERPUD2    | 7.5   | 12.2  | 0.7 | 1.6 | 5.0E-05 |
| NM_016343    | CENPF      | 20.5  | 33.2  | 0.7 | 1.6 | 5.0E-05 |
| NM_001206840 | TGOLN2     | 42.1  | 68.1  | 0.7 | 1.6 | 5.0E-05 |
| NR_029193    | SH3RF3-AS1 | 2.3   | 3.7   | 0.7 | 1.6 | 3.5E-04 |
| NM_001009984 | C20orf194  | 3.7   | 5.9   | 0.7 | 1.6 | 5.0E-05 |
| NM_003607    | CDC42BPA   | 5.0   | 8.1   | 0.7 | 1.6 | 5.0E-05 |
| NM_007043    | KRR1       | 19.6  | 31.8  | 0.7 | 1.6 | 5.0E-05 |
| NM_001190799 | PLK4       | 12.7  | 20.6  | 0.7 | 1.6 | 5.0E-05 |
| NM_001288980 | C18orf54   | 4.0   | 6.5   | 0.7 | 1.6 | 5.0E-05 |
| NM_001017369 | MSMO1      | 32.4  | 52.6  | 0.7 | 1.6 | 5.0E-05 |
| NM_001161625 | NXNL2      | 2.8   | 4.6   | 0.7 | 1.6 | 3.0E-04 |
| NM_001287437 | JADE1      | 21.4  | 34.8  | 0.7 | 1.6 | 5.0E-05 |



|              |              |       |       |     |     |         |
|--------------|--------------|-------|-------|-----|-----|---------|
| NM_006366    | CAP2         | 12.2  | 19.8  | 0.7 | 1.6 | 5.0E-05 |
| NM_002072    | GNAQ         | 12.5  | 20.3  | 0.7 | 1.6 | 5.0E-05 |
| NM_015150    | RFTN1        | 17.7  | 28.8  | 0.7 | 1.6 | 5.0E-05 |
| NM_032449    | CC2D1B       | 6.9   | 11.3  | 0.7 | 1.6 | 5.0E-05 |
| NM_021090    | MTMR3        | 5.0   | 8.1   | 0.7 | 1.6 | 5.0E-05 |
| NM_001272053 | MRFAP1       | 114.5 | 186.2 | 0.7 | 1.6 | 5.0E-05 |
| NR_002612    | DLEU2        | 2.8   | 4.6   | 0.7 | 1.6 | 5.0E-05 |
| NM_001010895 | ERCC6L2      | 3.2   | 5.2   | 0.7 | 1.6 | 5.0E-05 |
| NM_152680    | TMEM154      | 4.5   | 7.3   | 0.7 | 1.6 | 5.0E-05 |
| NM_017858    | TIPIN        | 9.4   | 15.3  | 0.7 | 1.6 | 5.0E-05 |
| NM_001010915 | PTPLAD2      | 5.0   | 8.2   | 0.7 | 1.6 | 5.0E-05 |
| NM_001013619 | AGPHD1       | 1.5   | 2.4   | 0.7 | 1.6 | 2.0E-04 |
| NM_001144995 | CCDC85C      | 6.4   | 10.4  | 0.7 | 1.6 | 5.0E-05 |
| NM_052845    | MMAB         | 4.1   | 6.7   | 0.7 | 1.6 | 5.0E-05 |
| NM_016093    | RPL26L1      | 68.5  | 111.7 | 0.7 | 1.6 | 5.0E-05 |
| NM_001271608 | LASP1        | 93.0  | 151.8 | 0.7 | 1.6 | 5.0E-05 |
| NM_001145277 | NECAP2       | 32.6  | 53.2  | 0.7 | 1.6 | 5.0E-05 |
| NM_017572    | MKNK2        | 22.4  | 36.6  | 0.7 | 1.6 | 5.0E-05 |
| NM_015655    | ZNF337       | 5.3   | 8.7   | 0.7 | 1.6 | 5.0E-05 |
| NM_001261833 | JRKL         | 3.4   | 5.5   | 0.7 | 1.6 | 5.0E-05 |
| NM_003715    | USO1         | 20.4  | 33.3  | 0.7 | 1.6 | 5.0E-05 |
| NM_001142725 | ERI2         | 4.9   | 8.1   | 0.7 | 1.6 | 5.0E-05 |
| NM_006915    | RP2          | 7.3   | 11.9  | 0.7 | 1.6 | 5.0E-05 |
| NM_001261408 | BCAR3        | 16.1  | 26.3  | 0.7 | 1.6 | 5.0E-05 |
| NM_001145154 | DNAH14       | 3.5   | 5.7   | 0.7 | 1.6 | 5.0E-05 |
| NM_001167865 | NSMCE4A      | 12.2  | 20.0  | 0.7 | 1.6 | 5.0E-05 |
| NM_001455    | FOXO3        | 7.6   | 12.4  | 0.7 | 1.6 | 5.0E-05 |
| NM_001282546 | STK40        | 6.3   | 10.4  | 0.7 | 1.6 | 5.0E-05 |
| NM_001105573 | FBXO45       | 5.7   | 9.3   | 0.7 | 1.6 | 5.0E-05 |
| NM_001145349 | IPP          | 4.2   | 6.9   | 0.7 | 1.6 | 5.0E-05 |
| NR_037883    | LOC100506421 | 4.5   | 7.4   | 0.7 | 1.6 | 2.0E-03 |
| NM_001112734 | ZSCAN30      | 2.0   | 3.3   | 0.7 | 1.6 | 5.0E-05 |
| NM_001159699 | FHL1         | 36.6  | 60.1  | 0.7 | 1.6 | 5.0E-05 |
| NM_001143959 | C2orf74      | 3.6   | 6.0   | 0.7 | 1.6 | 5.0E-05 |
| NM_014048    | MKL2         | 5.4   | 8.8   | 0.7 | 1.6 | 5.0E-05 |
| NM_012448    | STAT5B       | 6.2   | 10.1  | 0.7 | 1.6 | 5.0E-05 |
| NM_001242812 | LOC284385    | 1.5   | 2.5   | 0.7 | 1.6 | 3.9E-03 |
| NM_001001974 | PLEKHA1      | 12.5  | 20.5  | 0.7 | 1.6 | 5.0E-05 |
| NM_145166    | ZBTB47       | 3.8   | 6.2   | 0.7 | 1.6 | 5.0E-05 |
| NM_001130414 | APBA2        | 3.1   | 5.1   | 0.7 | 1.6 | 5.0E-05 |
| NM_001037144 | CNTROB       | 11.6  | 19.1  | 0.7 | 1.6 | 5.0E-05 |
| NM_012479    | YWHAG        | 77.9  | 128.1 | 0.7 | 1.6 | 5.0E-05 |
| NM_001165030 | TMEM41B      | 10.5  | 17.3  | 0.7 | 1.6 | 5.0E-05 |
| NM_020156    | C1GALT1      | 11.7  | 19.2  | 0.7 | 1.6 | 5.0E-05 |
| NM_017639    | DCHS2        | 2.0   | 3.3   | 0.7 | 1.6 | 3.5E-04 |
| NM_181786    | HKR1         | 5.4   | 8.9   | 0.7 | 1.6 | 5.0E-05 |
| NM_173475    | DCUN1D3      | 4.1   | 6.7   | 0.7 | 1.6 | 5.0E-05 |
| NM_024713    | KATNBL1      | 9.1   | 15.0  | 0.7 | 1.6 | 5.0E-05 |
| NM_001155    | ANXA6        | 116.8 | 192.3 | 0.7 | 1.6 | 5.0E-05 |
| NM_024028    | PCYOX1L      | 10.5  | 17.2  | 0.7 | 1.6 | 5.0E-05 |
| NM_152603    | ZNF567       | 2.0   | 3.3   | 0.7 | 1.6 | 5.0E-05 |
| NM_016371    | HSD17B7      | 4.8   | 7.9   | 0.7 | 1.6 | 5.0E-05 |
| NM_001012398 | AKTIP        | 5.6   | 9.3   | 0.7 | 1.6 | 1.5E-04 |
| NR_027451    | LINC00657    | 30.6  | 50.6  | 0.7 | 1.6 | 5.0E-05 |
| NM_005741    | ZNF263       | 6.5   | 10.8  | 0.7 | 1.7 | 5.0E-05 |
| NR_001588    | SBDSP1       | 12.2  | 20.1  | 0.7 | 1.7 | 5.0E-05 |
| NM_153257    | ZNF461       | 1.7   | 2.8   | 0.7 | 1.7 | 5.0E-05 |
| NM_001156    | ANXA7        | 30.2  | 49.9  | 0.7 | 1.7 | 5.0E-05 |
| NM_001031701 | NT5DC3       | 2.4   | 3.9   | 0.7 | 1.7 | 5.0E-05 |
| NM_001012754 | NHLRC3       | 6.4   | 10.5  | 0.7 | 1.7 | 5.0E-05 |
| NM_017769    | G2E3         | 8.4   | 13.9  | 0.7 | 1.7 | 5.0E-05 |

|              |              |        |        |     |     |         |
|--------------|--------------|--------|--------|-----|-----|---------|
| NM_001134364 | MAP4         | 71.6   | 118.4  | 0.7 | 1.7 | 5.0E-05 |
| NM_000201    | ICAM1        | 18.7   | 31.0   | 0.7 | 1.7 | 5.0E-05 |
| NM_199227    | METAP1D      | 1.8    | 3.0    | 0.7 | 1.7 | 5.0E-05 |
| NM_001100389 | TMEM192      | 4.8    | 8.0    | 0.7 | 1.7 | 5.0E-05 |
| NM_001243571 | MTMR2        | 14.2   | 23.5   | 0.7 | 1.7 | 5.0E-05 |
| NM_153358    | ZNF791       | 2.9    | 4.8    | 0.7 | 1.7 | 5.0E-05 |
| NM_001042552 | TATDN3       | 3.9    | 6.5    | 0.7 | 1.7 | 5.0E-05 |
| NM_173683    | XKR6         | 1.5    | 2.5    | 0.7 | 1.7 | 5.0E-05 |
| NM_031910    | C1QTNF6      | 6.3    | 10.4   | 0.7 | 1.7 | 5.0E-05 |
| NM_021137    | TNFAIP1      | 34.8   | 57.8   | 0.7 | 1.7 | 5.0E-05 |
| NM_001131035 | ZCCHC9       | 15.2   | 25.2   | 0.7 | 1.7 | 5.0E-05 |
| NM_014168    | METTL5       | 31.1   | 51.6   | 0.7 | 1.7 | 6.0E-04 |
| NM_001143823 | ZBTB14       | 3.8    | 6.3    | 0.7 | 1.7 | 5.0E-05 |
| NR_026827    | LINC00839    | 3.8    | 6.4    | 0.7 | 1.7 | 5.0E-05 |
| NM_015525    | IBTK         | 9.9    | 16.5   | 0.7 | 1.7 | 5.0E-05 |
| NM_005953    | MT2A         | 2204.6 | 3667.3 | 0.7 | 1.7 | 5.0E-05 |
| NM_001025300 | RAB12        | 13.9   | 23.1   | 0.7 | 1.7 | 5.0E-05 |
| NM_001251904 | APPL2        | 11.2   | 18.6   | 0.7 | 1.7 | 5.0E-05 |
| NM_016433    | GLTP         | 12.4   | 20.6   | 0.7 | 1.7 | 5.0E-05 |
| NM_001010854 | TTC7B        | 5.8    | 9.6    | 0.7 | 1.7 | 5.0E-05 |
| NM_001010883 | FAM102B      | 3.6    | 6.0    | 0.7 | 1.7 | 5.0E-05 |
| NM_001113226 | NTNG1        | 2.5    | 4.1    | 0.7 | 1.7 | 5.0E-05 |
| NM_001114734 | PABPC4L      | 1.8    | 3.0    | 0.7 | 1.7 | 5.0E-05 |
| NM_014425    | INVS         | 2.8    | 4.7    | 0.7 | 1.7 | 5.0E-05 |
| NM_001190972 | LOC100127983 | 9.4    | 15.6   | 0.7 | 1.7 | 5.0E-05 |
| NM_001033057 | MAG1         | 3.0    | 5.0    | 0.7 | 1.7 | 5.0E-05 |
| NM_001082480 | ZNF623       | 5.0    | 8.4    | 0.7 | 1.7 | 5.0E-05 |
| NM_001173523 | PCDH7        | 2.6    | 4.3    | 0.7 | 1.7 | 5.0E-05 |
| NM_003649    | DDO          | 1.6    | 2.6    | 0.7 | 1.7 | 5.0E-05 |
| NM_001195200 | CCDC107      | 9.4    | 15.8   | 0.7 | 1.7 | 5.0E-05 |
| NM_001195822 | HSDL2        | 7.6    | 12.8   | 0.7 | 1.7 | 5.0E-05 |
| NM_001127394 | TSEN15       | 16.4   | 27.5   | 0.7 | 1.7 | 5.0E-05 |
| NM_181719    | TMCO4        | 4.2    | 7.1    | 0.7 | 1.7 | 5.0E-05 |
| NM_152342    | CDYL2        | 1.7    | 2.9    | 0.7 | 1.7 | 5.0E-05 |
| NM_001164317 | FLNB         | 84.5   | 141.6  | 0.7 | 1.7 | 5.0E-05 |
| NM_001142645 | TMEM194B     | 3.9    | 6.5    | 0.7 | 1.7 | 5.0E-05 |
| NM_181716    | CENPV        | 6.6    | 11.0   | 0.7 | 1.7 | 5.0E-05 |
| NM_001130071 | EPN1         | 26.2   | 44.0   | 0.7 | 1.7 | 5.0E-05 |
| NM_001102592 | HENMT1       | 1.6    | 2.7    | 0.7 | 1.7 | 5.0E-05 |
| NM_015626    | WSB1         | 29.9   | 50.2   | 0.7 | 1.7 | 5.0E-05 |
| NM_001184734 | ASTN2        | 2.0    | 3.3    | 0.7 | 1.7 | 5.8E-03 |
| NM_001284338 | NEDD4        | 14.4   | 24.3   | 0.7 | 1.7 | 5.0E-05 |
| NM_194285    | SPTY2D1      | 5.4    | 9.1    | 0.7 | 1.7 | 5.0E-05 |
| NM_001256171 | ZNF85        | 3.9    | 6.5    | 0.7 | 1.7 | 5.0E-05 |
| NM_173566    | PRR14L       | 4.6    | 7.7    | 0.8 | 1.7 | 5.0E-05 |
| NM_198468    | MMS22L       | 4.0    | 6.7    | 0.8 | 1.7 | 5.0E-05 |
| NM_003766    | BECN1        | 19.1   | 32.1   | 0.8 | 1.7 | 5.0E-05 |
| NM_024641    | MANEA        | 4.7    | 7.9    | 0.8 | 1.7 | 5.0E-05 |
| NM_012173    | FBXO25       | 3.4    | 5.8    | 0.8 | 1.7 | 5.0E-05 |
| NM_024734    | CLMN         | 4.7    | 7.9    | 0.8 | 1.7 | 5.0E-05 |
| NM_001270766 | NTAN1        | 32.9   | 55.4   | 0.8 | 1.7 | 3.0E-04 |
| NM_130847    | AMOTL1       | 5.1    | 8.6    | 0.8 | 1.7 | 5.0E-05 |
| NM_003840    | TNFRSF10D    | 16.0   | 27.0   | 0.8 | 1.7 | 5.0E-05 |
| NM_001142556 | HMMR         | 30.2   | 50.9   | 0.8 | 1.7 | 5.0E-05 |
| NM_001127183 | CFLAR        | 18.5   | 31.3   | 0.8 | 1.7 | 5.0E-05 |
| NM_001007189 | IGIP         | 8.9    | 15.0   | 0.8 | 1.7 | 5.0E-05 |
| NM_001171506 | MCFD2        | 44.9   | 75.8   | 0.8 | 1.7 | 5.0E-05 |
| NR_038904    | LOC100506305 | 5.4    | 9.1    | 0.8 | 1.7 | 5.0E-05 |
| NM_001204492 | CAMK2G       | 9.5    | 16.0   | 0.8 | 1.7 | 5.0E-05 |
| NM_001093771 | TXNRD1       | 65.9   | 111.4  | 0.8 | 1.7 | 5.0E-05 |
| NM_001012455 | ZSCAN23      | 2.0    | 3.4    | 0.8 | 1.7 | 5.0E-05 |

|              |           |       |       |     |     |         |
|--------------|-----------|-------|-------|-----|-----|---------|
| NM_001003897 | MANBAL    | 34.1  | 57.6  | 0.8 | 1.7 | 5.0E-05 |
| NM_144682    | SLFN13    | 3.0   | 5.1   | 0.8 | 1.7 | 5.0E-05 |
| NM_007018    | CNTRL     | 2.3   | 3.8   | 0.8 | 1.7 | 5.0E-05 |
| NM_016173    | HEMK1     | 2.0   | 3.5   | 0.8 | 1.7 | 5.0E-05 |
| NM_001193508 | REST      | 11.1  | 18.8  | 0.8 | 1.7 | 5.0E-05 |
| NM_052899    | GPRIN1    | 9.0   | 15.2  | 0.8 | 1.7 | 5.0E-05 |
| NM_207380    | C15orf52  | 4.4   | 7.5   | 0.8 | 1.7 | 5.0E-05 |
| NM_001008493 | ENAH      | 21.0  | 35.6  | 0.8 | 1.7 | 5.0E-05 |
| NM_032933    | TMEM241   | 3.2   | 5.4   | 0.8 | 1.7 | 5.0E-05 |
| NM_001113347 | ECE1      | 30.6  | 52.0  | 0.8 | 1.7 | 5.0E-05 |
| NM_001512    | GSTA4     | 3.9   | 6.6   | 0.8 | 1.7 | 5.0E-05 |
| NM_001127207 | SMARCAL1  | 6.6   | 11.2  | 0.8 | 1.7 | 5.0E-05 |
| NM_152485    | C1orf74   | 2.8   | 4.7   | 0.8 | 1.7 | 5.0E-05 |
| NM_005112    | WDR1      | 186.6 | 317.1 | 0.8 | 1.7 | 5.0E-05 |
| NM_001099289 | SH3RF3    | 3.1   | 5.2   | 0.8 | 1.7 | 5.0E-05 |
| NM_001018057 | DKK3      | 72.3  | 122.9 | 0.8 | 1.7 | 5.0E-05 |
| NM_004157    | PRKAR2A   | 12.5  | 21.3  | 0.8 | 1.7 | 5.0E-05 |
| NM_001039886 | ZNF808    | 4.3   | 7.3   | 0.8 | 1.7 | 5.0E-05 |
| NM_001282168 | VPS36     | 10.7  | 18.1  | 0.8 | 1.7 | 5.0E-05 |
| NM_001002000 | GMPR2     | 15.3  | 26.1  | 0.8 | 1.7 | 6.4E-03 |
| NM_001100619 | CABLES1   | 4.9   | 8.3   | 0.8 | 1.7 | 5.0E-05 |
| NM_001278055 | SACS      | 13.6  | 23.1  | 0.8 | 1.7 | 5.0E-05 |
| NM_002006    | FGF2      | 13.7  | 23.3  | 0.8 | 1.7 | 5.0E-05 |
| NM_001005417 | B4GALT2   | 24.4  | 41.7  | 0.8 | 1.7 | 5.0E-05 |
| NM_152653    | UBE2E2    | 7.6   | 12.9  | 0.8 | 1.7 | 5.0E-05 |
| NR_037480    | MIR3916   | 9.0   | 15.4  | 0.8 | 1.7 | 5.0E-05 |
| NM_001146068 | CAPN2     | 98.8  | 168.8 | 0.8 | 1.7 | 5.0E-05 |
| NM_144976    | ZNF564    | 1.8   | 3.1   | 0.8 | 1.7 | 5.0E-05 |
| NM_002705    | PPL       | 1.9   | 3.2   | 0.8 | 1.7 | 9.4E-03 |
| NM_001135037 | MFAP3     | 18.0  | 30.8  | 0.8 | 1.7 | 5.0E-05 |
| NM_020755    | SERINC1   | 61.4  | 105.0 | 0.8 | 1.7 | 5.0E-05 |
| NM_002211    | ITGB1     | 467.4 | 799.2 | 0.8 | 1.7 | 5.0E-05 |
| NM_144721    | THAP6     | 3.5   | 5.9   | 0.8 | 1.7 | 5.0E-05 |
| NM_001146337 | AFAP1L1   | 16.8  | 28.7  | 0.8 | 1.7 | 5.0E-05 |
| NM_005013    | NUCB2     | 19.5  | 33.4  | 0.8 | 1.7 | 5.0E-05 |
| NM_001032372 | ZNF226    | 5.9   | 10.1  | 0.8 | 1.7 | 5.0E-05 |
| NM_001080416 | MYBL1     | 9.0   | 15.5  | 0.8 | 1.7 | 5.0E-05 |
| NM_001252148 | SLC39A9   | 14.0  | 24.0  | 0.8 | 1.7 | 5.0E-05 |
| NM_153369    | KIAA1919  | 3.2   | 5.6   | 0.8 | 1.7 | 5.0E-05 |
| NM_024562    | TANGO6    | 4.1   | 7.1   | 0.8 | 1.7 | 5.0E-05 |
| NM_001080411 | ZNF433    | 1.9   | 3.3   | 0.8 | 1.7 | 5.0E-05 |
| NM_000050    | ASS1      | 28.6  | 49.1  | 0.8 | 1.7 | 5.0E-05 |
| NM_001135178 | ZNF397    | 2.2   | 3.8   | 0.8 | 1.7 | 5.0E-05 |
| NM_004716    | PCSK7     | 24.2  | 41.5  | 0.8 | 1.7 | 2.8E-02 |
| NM_001258388 | FAM173B   | 3.6   | 6.1   | 0.8 | 1.7 | 5.0E-05 |
| NM_012081    | ELL2      | 24.4  | 42.0  | 0.8 | 1.7 | 5.0E-05 |
| NM_016618    | KRCC1     | 7.1   | 12.2  | 0.8 | 1.7 | 5.0E-05 |
| NM_001104925 | PCMTD2    | 3.9   | 6.6   | 0.8 | 1.7 | 5.0E-05 |
| NM_001201329 | PPP1R3B   | 9.8   | 16.8  | 0.8 | 1.7 | 5.0E-05 |
| NM_005804    | DDX39A    | 71.2  | 122.5 | 0.8 | 1.7 | 5.0E-05 |
| NM_001085471 | FOXN3     | 8.1   | 14.0  | 0.8 | 1.7 | 5.0E-05 |
| NM_012405    | ICMT      | 26.0  | 44.9  | 0.8 | 1.7 | 5.0E-05 |
| NM_001013625 | C1orf192  | 1.5   | 2.6   | 0.8 | 1.7 | 1.5E-02 |
| NM_002053    | GBP1      | 21.3  | 36.8  | 0.8 | 1.7 | 5.0E-05 |
| NM_016028    | SUV420H1  | 12.6  | 21.8  | 0.8 | 1.7 | 5.0E-05 |
| NM_001135820 | TMEM2     | 32.9  | 56.8  | 0.8 | 1.7 | 5.0E-05 |
| NR_029495    | LOC284454 | 3.5   | 6.1   | 0.8 | 1.7 | 5.0E-05 |
| NM_002214    | ITGB8     | 3.3   | 5.8   | 0.8 | 1.7 | 5.0E-05 |
| NM_001031628 | SMAGP     | 9.4   | 16.3  | 0.8 | 1.7 | 1.6E-02 |
| NM_152308    | RMI2      | 10.8  | 18.6  | 0.8 | 1.7 | 5.0E-05 |
| NM_001040020 | FAM3C     | 22.6  | 39.2  | 0.8 | 1.7 | 5.0E-05 |

|              |           |       |       |     |     |         |
|--------------|-----------|-------|-------|-----|-----|---------|
| NM_001102    | ACTN1     | 275.4 | 477.0 | 0.8 | 1.7 | 5.0E-05 |
| NM_001286233 | SLC2A14   | 8.2   | 14.2  | 0.8 | 1.7 | 5.0E-05 |
| NM_001039492 | FHL2      | 79.0  | 136.8 | 0.8 | 1.7 | 5.0E-05 |
| NM_145911    | ZNF23     | 2.9   | 5.0   | 0.8 | 1.7 | 5.0E-05 |
| NR_103711    | PAPPA-AS1 | 4.2   | 7.3   | 0.8 | 1.7 | 5.0E-05 |
| NM_015319    | TENC1     | 5.7   | 9.8   | 0.8 | 1.7 | 5.0E-05 |
| NM_001136494 | C1orf198  | 7.8   | 13.6  | 0.8 | 1.7 | 5.0E-05 |
| NM_001012270 | BIRC5     | 45.0  | 78.2  | 0.8 | 1.7 | 5.0E-05 |
| NM_001080976 | DSE       | 20.4  | 35.4  | 0.8 | 1.7 | 5.0E-05 |
| NM_030915    | LBH       | 41.6  | 72.3  | 0.8 | 1.7 | 5.0E-05 |
| NM_001024847 | TGFBR2    | 47.2  | 81.9  | 0.8 | 1.7 | 5.0E-05 |
| NM_001008539 | SLC7A2    | 10.0  | 17.4  | 0.8 | 1.7 | 5.0E-05 |
| NM_014629    | ARHGEF10  | 10.2  | 17.7  | 0.8 | 1.7 | 5.0E-05 |
| NM_017945    | SLC35A5   | 11.0  | 19.1  | 0.8 | 1.7 | 5.0E-05 |
| NM_001099225 | CCDC43    | 13.7  | 23.9  | 0.8 | 1.7 | 5.0E-05 |
| NM_030821    | PLA2G12A  | 2.9   | 5.1   | 0.8 | 1.7 | 5.0E-05 |
| NM_005955    | MTF1      | 3.4   | 5.9   | 0.8 | 1.7 | 5.0E-05 |
| NM_001128223 | ZNF717    | 1.5   | 2.6   | 0.8 | 1.7 | 5.0E-05 |
| NM_014974    | DIP2C     | 4.3   | 7.4   | 0.8 | 1.7 | 5.0E-05 |
| NM_001083963 | TDRKH     | 4.0   | 6.9   | 0.8 | 1.7 | 5.0E-05 |
| NM_001254738 | RND3      | 29.8  | 52.0  | 0.8 | 1.7 | 5.0E-05 |
| NM_001281293 | ZNF281    | 8.0   | 14.0  | 0.8 | 1.7 | 5.0E-05 |
| NM_005321    | HIST1H1E  | 2.4   | 4.2   | 0.8 | 1.7 | 3.0E-03 |
| NM_002254    | KIF3C     | 4.0   | 7.0   | 0.8 | 1.7 | 5.0E-05 |
| NM_005246    | FER       | 6.1   | 10.6  | 0.8 | 1.7 | 5.0E-05 |
| NM_030961    | TRIM56    | 6.8   | 11.9  | 0.8 | 1.7 | 5.0E-05 |
| NM_001286702 | ARMC1     | 14.9  | 26.0  | 0.8 | 1.7 | 5.0E-05 |
| NM_001114120 | DEPDC1    | 18.0  | 31.5  | 0.8 | 1.7 | 5.0E-05 |
| NM_001249    | ENTPD5    | 2.8   | 4.8   | 0.8 | 1.7 | 4.2E-03 |
| NM_002907    | RECQL     | 13.0  | 22.7  | 0.8 | 1.7 | 5.0E-05 |
| NM_001008410 | STEAP3    | 6.9   | 12.0  | 0.8 | 1.7 | 5.0E-05 |
| NM_001029859 | KCTD21    | 2.9   | 5.0   | 0.8 | 1.7 | 5.0E-05 |
| NM_001033553 | SPECC1    | 17.5  | 30.6  | 0.8 | 1.7 | 5.0E-05 |
| NM_007271    | STK38     | 21.0  | 36.7  | 0.8 | 1.7 | 5.0E-05 |
| NM_052876    | NACC1     | 20.3  | 35.5  | 0.8 | 1.7 | 5.0E-05 |
| NM_022475    | HHIP      | 1.9   | 3.4   | 0.8 | 1.8 | 5.0E-05 |
| NM_001025247 | TAF5L     | 9.5   | 16.7  | 0.8 | 1.8 | 5.0E-05 |
| NM_014241    | PTPLA     | 19.4  | 33.9  | 0.8 | 1.8 | 5.0E-05 |
| NM_138330    | ZNF675    | 3.0   | 5.2   | 0.8 | 1.8 | 5.0E-05 |
| NM_207330    | NIPAL1    | 1.6   | 2.8   | 0.8 | 1.8 | 5.0E-05 |
| NM_001287491 | TET3      | 3.5   | 6.1   | 0.8 | 1.8 | 5.0E-05 |
| NM_001271848 | ZNF700    | 5.8   | 10.2  | 0.8 | 1.8 | 5.0E-05 |
| NM_000713    | BLVRB     | 24.9  | 43.9  | 0.8 | 1.8 | 5.0E-05 |
| NM_001400    | S1PR1     | 3.6   | 6.4   | 0.8 | 1.8 | 5.0E-05 |
| NM_173666    | DTWD2     | 2.0   | 3.4   | 0.8 | 1.8 | 5.0E-05 |
| NM_022483    | C5orf28   | 3.5   | 6.1   | 0.8 | 1.8 | 5.0E-05 |
| NM_206966    | C5orf46   | 7.2   | 12.7  | 0.8 | 1.8 | 4.0E-03 |
| NM_002998    | SDC2      | 35.6  | 62.7  | 0.8 | 1.8 | 5.0E-05 |
| NM_001080510 | METTL23   | 14.6  | 25.8  | 0.8 | 1.8 | 5.0E-05 |
| NM_001101669 | INPP4B    | 5.7   | 10.1  | 0.8 | 1.8 | 5.0E-05 |
| NM_002581    | PAPPA     | 3.5   | 6.2   | 0.8 | 1.8 | 5.0E-05 |
| NM_001380    | DOCK1     | 12.3  | 21.6  | 0.8 | 1.8 | 5.0E-05 |
| NM_020651    | PELI1     | 4.5   | 8.0   | 0.8 | 1.8 | 5.0E-05 |
| NM_001122679 | TENM2     | 3.0   | 5.3   | 0.8 | 1.8 | 5.0E-05 |
| NM_001172671 | ZNF430    | 1.9   | 3.4   | 0.8 | 1.8 | 5.0E-05 |
| NM_001164478 | C5orf63   | 2.5   | 4.4   | 0.8 | 1.8 | 5.0E-05 |
| NM_001285387 | THOC7     | 36.2  | 64.0  | 0.8 | 1.8 | 5.0E-05 |
| NM_017845    | COMMD8    | 12.4  | 22.0  | 0.8 | 1.8 | 5.0E-05 |
| NM_022121    | PERP      | 3.0   | 5.3   | 0.8 | 1.8 | 5.0E-05 |
| NM_005067    | SIAH2     | 8.6   | 15.2  | 0.8 | 1.8 | 5.0E-05 |
| NR_026761    | LINC00467 | 7.0   | 12.4  | 0.8 | 1.8 | 5.0E-05 |

|              |             |       |       |     |     |         |
|--------------|-------------|-------|-------|-----|-----|---------|
| NM_018218    | USP40       | 8.3   | 14.7  | 0.8 | 1.8 | 5.0E-05 |
| NM_001190992 | SLC33A1     | 5.2   | 9.3   | 0.8 | 1.8 | 5.0E-05 |
| NM_001112808 | FPGT-TNNI3K | 1.7   | 3.1   | 0.8 | 1.8 | 5.0E-05 |
| NM_001011513 | PDLIM5      | 35.5  | 70.8  | 0.8 | 1.8 | 5.0E-05 |
| NM_007082    | RABL2A      | 1.5   | 2.7   | 0.8 | 1.8 | 5.0E-05 |
| NM_001286247 | RALGPS2     | 5.4   | 9.5   | 0.8 | 1.8 | 5.0E-05 |
| NR_027183    | LINC00847   | 1.7   | 3.0   | 0.8 | 1.8 | 5.0E-05 |
| NM_022746    | MARC1       | 8.9   | 15.7  | 0.8 | 1.8 | 5.0E-05 |
| NM_001144060 | NHSL1       | 1.5   | 2.7   | 0.8 | 1.8 | 5.0E-05 |
| NM_001243766 | POMGNT1     | 14.0  | 24.9  | 0.8 | 1.8 | 5.0E-05 |
| NM_014519    | ZNF232      | 4.6   | 8.2   | 0.8 | 1.8 | 2.7E-02 |
| NM_017421    | COQ3        | 7.3   | 12.9  | 0.8 | 1.8 | 5.0E-05 |
| NM_001031672 | CYB5RL      | 1.6   | 2.8   | 0.8 | 1.8 | 5.0E-05 |
| NM_153267    | MAMDC2      | 5.1   | 9.1   | 0.8 | 1.8 | 5.0E-05 |
| NM_001177381 | CPEB2       | 1.9   | 3.3   | 0.8 | 1.8 | 5.0E-05 |
| NM_018664    | BATF3       | 3.0   | 5.4   | 0.8 | 1.8 | 5.0E-05 |
| NM_001497    | B4GALT1     | 34.2  | 61.0  | 0.8 | 1.8 | 5.0E-05 |
| NM_000754    | COMT        | 23.5  | 41.9  | 0.8 | 1.8 | 5.0E-05 |
| NM_002841    | PTPRG       | 7.2   | 12.9  | 0.8 | 1.8 | 5.0E-05 |
| NM_175617    | MT1E        | 537.3 | 957.9 | 0.8 | 1.8 | 5.0E-05 |
| NM_003045    | SLC7A1      | 29.2  | 52.2  | 0.8 | 1.8 | 5.0E-05 |
| NM_001177591 | PPP2R2A     | 12.4  | 22.1  | 0.8 | 1.8 | 5.0E-05 |
| NM_058182    | SMIM11      | 8.7   | 15.4  | 0.8 | 1.8 | 5.0E-05 |
| NM_001130    | AES         | 59.7  | 106.6 | 0.8 | 1.8 | 5.0E-05 |
| NM_006052    | DSCR3       | 9.2   | 16.4  | 0.8 | 1.8 | 5.0E-05 |
| NM_003150    | STAT3       | 24.1  | 43.1  | 0.8 | 1.8 | 5.0E-05 |
| NM_001080493 | ZNF823      | 2.8   | 5.0   | 0.8 | 1.8 | 5.0E-05 |
| NM_007130    | ZNF41       | 1.6   | 2.9   | 0.8 | 1.8 | 5.0E-05 |
| NM_014153    | ZC3H7A      | 13.0  | 23.3  | 0.8 | 1.8 | 5.0E-05 |
| NM_020371    | AVEN        | 13.7  | 24.5  | 0.8 | 1.8 | 5.0E-05 |
| NM_014594    | ZNF354C     | 2.3   | 4.1   | 0.8 | 1.8 | 5.0E-05 |
| NM_002852    | PTX3        | 5.2   | 9.4   | 0.8 | 1.8 | 5.0E-05 |
| NM_001284388 | NOLC1       | 24.3  | 43.5  | 0.8 | 1.8 | 5.0E-05 |
| NM_001256282 | KRT8        | 538.3 | 964.1 | 0.8 | 1.8 | 5.0E-05 |
| NM_001003679 | LEPR        | 27.0  | 48.4  | 0.8 | 1.8 | 5.0E-05 |
| NM_001004065 | AKAP2       | 46.8  | 83.8  | 0.8 | 1.8 | 5.0E-05 |
| NM_153705    | KDELC2      | 16.8  | 30.0  | 0.8 | 1.8 | 5.0E-05 |
| NM_001287385 | FAM72C      | 1.7   | 3.1   | 0.8 | 1.8 | 5.0E-05 |
| NM_001206748 | CAV2        | 20.4  | 36.7  | 0.8 | 1.8 | 5.0E-05 |
| NM_000059    | BRCA2       | 3.2   | 5.7   | 0.8 | 1.8 | 5.0E-05 |
| NM_015653    | RIBC2       | 1.9   | 3.4   | 0.8 | 1.8 | 5.0E-05 |
| NM_001042576 | RRBP1       | 52.6  | 94.5  | 0.8 | 1.8 | 5.0E-05 |
| NM_001286974 | CTNNA1      | 28.4  | 51.1  | 0.8 | 1.8 | 5.0E-05 |
| NM_002204    | ITGA3       | 66.3  | 119.1 | 0.8 | 1.8 | 5.0E-05 |
| NM_001113239 | HIPK2       | 13.6  | 24.3  | 0.8 | 1.8 | 5.0E-05 |
| NM_003754    | EIF3F       | 99.3  | 178.4 | 0.8 | 1.8 | 5.0E-05 |
| NM_080821    | FAM210B     | 5.5   | 9.9   | 0.8 | 1.8 | 5.0E-05 |
| NM_006956    | ZNF12       | 3.8   | 6.8   | 0.8 | 1.8 | 5.0E-05 |
| NM_001102402 | PCTP        | 6.7   | 12.1  | 0.8 | 1.8 | 5.0E-05 |
| NM_001011666 | CREB5       | 2.5   | 4.5   | 0.8 | 1.8 | 5.0E-05 |
| NR_030732    | LOC645638   | 3.5   | 6.3   | 0.8 | 1.8 | 5.0E-05 |
| NM_020947    | TLDC1       | 6.1   | 11.1  | 0.8 | 1.8 | 5.0E-05 |
| NM_003082    | SNAPC1      | 12.2  | 22.0  | 0.8 | 1.8 | 5.0E-05 |
| NM_007238    | PXMP4       | 2.5   | 4.6   | 0.8 | 1.8 | 5.0E-05 |
| NM_031218    | ZNF93       | 4.5   | 8.1   | 0.9 | 1.8 | 5.0E-05 |
| NM_194449    | PHLPP1      | 4.3   | 7.8   | 0.9 | 1.8 | 5.0E-05 |
| NM_022460    | HS1BP3      | 8.1   | 14.6  | 0.9 | 1.8 | 5.0E-05 |
| NM_021076    | NEFH        | 1.7   | 3.1   | 0.9 | 1.8 | 5.0E-05 |
| NM_001135703 | LRP12       | 12.6  | 22.7  | 0.9 | 1.8 | 5.0E-05 |
| NM_032353    | VPS25       | 44.1  | 79.8  | 0.9 | 1.8 | 5.0E-05 |
| NM_001129993 | KIAA1841    | 4.8   | 8.6   | 0.9 | 1.8 | 5.0E-05 |

|              |              |       |       |     |     |         |
|--------------|--------------|-------|-------|-----|-----|---------|
| NM_015225    | PRUNE2       | 10.9  | 19.8  | 0.9 | 1.8 | 5.0E-05 |
| NM_000140    | FECH         | 3.6   | 6.6   | 0.9 | 1.8 | 5.0E-05 |
| NM_153028    | ZNF75A       | 7.1   | 12.9  | 0.9 | 1.8 | 5.0E-05 |
| NM_001271866 | GTF2H3       | 9.3   | 16.8  | 0.9 | 1.8 | 5.0E-05 |
| NM_014519    | ZNF232       | 3.0   | 5.4   | 0.9 | 1.8 | 5.0E-05 |
| NM_000210    | ITGA6        | 2.9   | 5.3   | 0.9 | 1.8 | 5.0E-05 |
| NM_001080477 | TENM3        | 8.2   | 14.8  | 0.9 | 1.8 | 5.0E-05 |
| NM_001006617 | MAPKAP1      | 30.3  | 55.0  | 0.9 | 1.8 | 5.0E-05 |
| NM_152446    | CEP128       | 2.2   | 4.1   | 0.9 | 1.8 | 5.0E-05 |
| NM_001031693 | HHLA3        | 4.0   | 7.2   | 0.9 | 1.8 | 5.4E-03 |
| NM_001172638 | ZFP62        | 5.2   | 9.4   | 0.9 | 1.8 | 5.0E-05 |
| NM_005556    | KRT7         | 218.9 | 397.7 | 0.9 | 1.8 | 5.0E-05 |
| NM_001020818 | MYADM        | 40.0  | 72.8  | 0.9 | 1.8 | 5.0E-05 |
| NM_016429    | COPZ2        | 8.7   | 15.8  | 0.9 | 1.8 | 5.0E-05 |
| NM_001029839 | TCAIM        | 4.7   | 8.5   | 0.9 | 1.8 | 5.0E-05 |
| NM_004162    | RAB5A        | 15.2  | 27.7  | 0.9 | 1.8 | 5.0E-05 |
| NM_003299    | HSP90B1      | 357.8 | 651.4 | 0.9 | 1.8 | 5.0E-05 |
| NM_001100910 | FAM72B       | 2.3   | 4.1   | 0.9 | 1.8 | 5.0E-05 |
| NM_001164674 | SUMF1        | 11.7  | 21.4  | 0.9 | 1.8 | 5.0E-05 |
| NM_001005498 | RHBDF2       | 5.2   | 9.4   | 0.9 | 1.8 | 5.0E-05 |
| NM_001286116 | CCDC90B      | 6.4   | 11.6  | 0.9 | 1.8 | 5.0E-05 |
| NR_034121    | LOC100131067 | 2.1   | 3.8   | 0.9 | 1.8 | 4.5E-04 |
| NM_014214    | IMPA2        | 13.4  | 24.5  | 0.9 | 1.8 | 5.0E-05 |
| NM_014480    | ZNF544       | 4.1   | 7.5   | 0.9 | 1.8 | 5.0E-05 |
| NM_001007088 | ZNF182       | 1.8   | 3.3   | 0.9 | 1.8 | 5.0E-05 |
| NM_001195139 | COG4         | 15.6  | 28.4  | 0.9 | 1.8 | 5.0E-05 |
| NM_001039885 | FKRP         | 5.1   | 9.2   | 0.9 | 1.8 | 4.0E-04 |
| NR_038360    | SPTY2D1-AS1  | 2.8   | 5.0   | 0.9 | 1.8 | 5.9E-03 |
| NM_022039    | FBXW4        | 6.5   | 11.9  | 0.9 | 1.8 | 5.0E-05 |
| NM_001135032 | EVA1A        | 12.4  | 22.7  | 0.9 | 1.8 | 5.0E-05 |
| NM_001136570 | FAM47E       | 5.4   | 10.0  | 0.9 | 1.8 | 5.0E-05 |
| NM_021216    | ZNF71        | 3.1   | 5.7   | 0.9 | 1.8 | 5.0E-05 |
| NM_001244638 | ARID5B       | 2.7   | 5.0   | 0.9 | 1.8 | 5.0E-05 |
| NM_001001396 | ATP2B4       | 11.2  | 20.6  | 0.9 | 1.8 | 5.0E-05 |
| NM_006609    | MAP3K2       | 4.0   | 7.3   | 0.9 | 1.8 | 5.0E-05 |
| NM_003174    | SVIL         | 4.6   | 8.4   | 0.9 | 1.8 | 5.0E-05 |
| NM_003507    | FZD7         | 9.4   | 17.3  | 0.9 | 1.8 | 5.0E-05 |
| NM_004747    | DLG5         | 12.9  | 23.6  | 0.9 | 1.8 | 5.0E-05 |
| NM_022090    | C5orf54      | 1.6   | 2.9   | 0.9 | 1.8 | 5.0E-05 |
| NR_027007    | SETD5-AS1    | 6.6   | 12.1  | 0.9 | 1.8 | 5.5E-04 |
| NM_001289861 | PER3         | 2.1   | 3.9   | 0.9 | 1.8 | 5.0E-05 |
| NM_001145365 | ZNF652       | 2.8   | 5.1   | 0.9 | 1.8 | 5.0E-05 |
| NM_153681    | PIGP         | 7.1   | 13.0  | 0.9 | 1.8 | 5.0E-05 |
| NM_006315    | PCGF3        | 10.6  | 19.6  | 0.9 | 1.8 | 5.0E-05 |
| NM_138459    | NUS1         | 20.9  | 38.4  | 0.9 | 1.8 | 5.0E-05 |
| NM_001039141 | TRIOBP       | 21.1  | 38.9  | 0.9 | 1.8 | 5.0E-05 |
| NM_001289097 | AJUBA        | 24.0  | 44.1  | 0.9 | 1.8 | 5.0E-05 |
| NM_001270942 | KLF7         | 5.8   | 10.8  | 0.9 | 1.8 | 5.0E-05 |
| NM_001135554 | EPB41L2      | 30.6  | 56.3  | 0.9 | 1.8 | 5.0E-05 |
| NM_030572    | C12orf39     | 2.8   | 5.1   | 0.9 | 1.8 | 4.0E-04 |
| NM_173582    | PGM2L1       | 3.0   | 5.6   | 0.9 | 1.8 | 5.0E-05 |
| NM_001001890 | RUNX1        | 12.4  | 22.9  | 0.9 | 1.8 | 5.0E-05 |
| NM_001288579 | BROX         | 12.7  | 23.5  | 0.9 | 1.8 | 5.0E-05 |
| NM_052906    | ELFN2        | 3.1   | 5.7   | 0.9 | 1.8 | 5.0E-05 |
| NM_032834    | ALG10        | 3.5   | 6.4   | 0.9 | 1.8 | 5.0E-05 |
| NM_001164276 | ZNF44        | 3.9   | 7.3   | 0.9 | 1.8 | 5.0E-05 |
| NM_173531    | ZNF100       | 2.0   | 3.8   | 0.9 | 1.8 | 5.0E-05 |
| NM_001945    | HBEGF        | 9.0   | 16.6  | 0.9 | 1.8 | 5.0E-05 |
| NR_003051    | RMRP         | 19.9  | 36.7  | 0.9 | 1.8 | 5.0E-05 |
| NM_014779    | TSC22D2      | 9.2   | 17.1  | 0.9 | 1.8 | 5.0E-05 |
| NM_198476    | C19orf54     | 5.1   | 9.5   | 0.9 | 1.8 | 5.0E-05 |

|              |            |       |       |     |     |         |
|--------------|------------|-------|-------|-----|-----|---------|
| NM_001278196 | ZBTB18     | 8.2   | 15.2  | 0.9 | 1.8 | 5.0E-05 |
| NM_001025580 | AMMECR1    | 5.5   | 10.2  | 0.9 | 1.9 | 5.0E-05 |
| NM_001014794 | ILK        | 49.0  | 90.8  | 0.9 | 1.9 | 5.0E-05 |
| NM_005764    | PDZK1IP1   | 12.4  | 22.9  | 0.9 | 1.9 | 5.0E-05 |
| NM_016312    | WBP11      | 26.6  | 49.4  | 0.9 | 1.9 | 5.0E-05 |
| NM_001012320 | ZNF302     | 5.9   | 10.9  | 0.9 | 1.9 | 5.0E-05 |
| NM_001145775 | FKBP5      | 71.4  | 132.6 | 0.9 | 1.9 | 5.0E-05 |
| NM_002097    | GTF3A      | 28.4  | 52.7  | 0.9 | 1.9 | 5.0E-05 |
| NM_153260    | LRRC57     | 7.6   | 14.1  | 0.9 | 1.9 | 5.0E-05 |
| NM_021111    | RECK       | 10.4  | 19.3  | 0.9 | 1.9 | 5.0E-05 |
| NM_017947    | MOCOS      | 3.8   | 7.0   | 0.9 | 1.9 | 5.0E-05 |
| NM_001164715 | ZNF605     | 1.7   | 3.2   | 0.9 | 1.9 | 5.0E-05 |
| NM_021915    | ZNF69      | 3.5   | 6.6   | 0.9 | 1.9 | 5.0E-05 |
| NM_001100164 | PHACTR2    | 3.4   | 6.4   | 0.9 | 1.9 | 5.0E-05 |
| NM_014220    | TM4SF1     | 23.2  | 43.1  | 0.9 | 1.9 | 5.0E-05 |
| NM_001281463 | SMC1A      | 15.3  | 28.5  | 0.9 | 1.9 | 5.0E-05 |
| NM_001080392 | KIAA1147   | 3.8   | 7.1   | 0.9 | 1.9 | 5.0E-05 |
| NM_001287385 | FAM72C     | 3.0   | 5.6   | 0.9 | 1.9 | 5.0E-05 |
| NM_005100    | AKAP12     | 20.9  | 39.0  | 0.9 | 1.9 | 5.0E-05 |
| NM_001080417 | ZNF629     | 4.7   | 8.7   | 0.9 | 1.9 | 1.3E-03 |
| NM_001278734 | ZNF274     | 6.2   | 11.6  | 0.9 | 1.9 | 5.0E-05 |
| NM_005793    | NME6       | 10.2  | 19.1  | 0.9 | 1.9 | 5.0E-05 |
| NM_024685    | BBS10      | 2.2   | 4.2   | 0.9 | 1.9 | 5.0E-05 |
| NM_014077    | FAM32A     | 27.1  | 50.5  | 0.9 | 1.9 | 5.0E-05 |
| NM_001012756 | ZNF260     | 3.5   | 6.6   | 0.9 | 1.9 | 5.0E-05 |
| NM_001007094 | ZNF37A     | 3.6   | 6.6   | 0.9 | 1.9 | 5.0E-05 |
| NM_001079670 | CAB39L     | 1.5   | 2.7   | 0.9 | 1.9 | 5.0E-05 |
| NM_002473    | MYH9       | 239.0 | 447.2 | 0.9 | 1.9 | 5.0E-05 |
| NM_001286045 | RBM7       | 7.2   | 13.5  | 0.9 | 1.9 | 5.0E-05 |
| NM_033224    | PURB       | 8.4   | 15.8  | 0.9 | 1.9 | 5.0E-05 |
| NR_038378    | LOC441242  | 1.6   | 2.9   | 0.9 | 1.9 | 5.0E-05 |
| NM_173632    | ZNF776     | 2.5   | 4.6   | 0.9 | 1.9 | 5.0E-05 |
| NM_153687    | IKBIP      | 35.7  | 66.9  | 0.9 | 1.9 | 5.0E-05 |
| NM_021127    | PMAIP1     | 12.9  | 24.2  | 0.9 | 1.9 | 5.0E-05 |
| NM_018948    | ERRF1      | 22.4  | 42.1  | 0.9 | 1.9 | 5.0E-05 |
| NM_005909    | MAP1B      | 14.2  | 26.7  | 0.9 | 1.9 | 5.0E-05 |
| NM_014569    | ZKSCAN5    | 3.8   | 7.2   | 0.9 | 1.9 | 5.0E-05 |
| NM_002395    | ME1        | 5.1   | 9.6   | 0.9 | 1.9 | 5.0E-05 |
| NM_144600    | FOPNL      | 10.8  | 20.3  | 0.9 | 1.9 | 5.0E-05 |
| NM_001042454 | TGFB111    | 48.4  | 91.3  | 0.9 | 1.9 | 5.0E-05 |
| NM_001166159 | NDUFS2     | 22.5  | 42.4  | 0.9 | 1.9 | 5.0E-05 |
| NM_004705    | PRKRIR     | 15.9  | 30.0  | 0.9 | 1.9 | 5.0E-05 |
| NM_001172411 | VANGL1     | 7.4   | 14.1  | 0.9 | 1.9 | 5.0E-05 |
| NR_024397    | NUTM2A-AS1 | 6.7   | 12.7  | 0.9 | 1.9 | 5.0E-05 |
| NM_000191    | HMGCL      | 11.8  | 22.4  | 0.9 | 1.9 | 5.0E-05 |
| NM_001242946 | EPDR1      | 9.4   | 17.8  | 0.9 | 1.9 | 5.0E-05 |
| NM_001161576 | SAMD4A     | 8.1   | 15.4  | 0.9 | 1.9 | 5.0E-05 |
| NM_133460    | ZNF418     | 2.2   | 4.1   | 0.9 | 1.9 | 5.0E-05 |
| NR_040585    | STAG3L4    | 4.2   | 7.9   | 0.9 | 1.9 | 5.0E-05 |
| NM_001669    | ARSD       | 3.1   | 6.0   | 0.9 | 1.9 | 5.0E-05 |
| NM_001286398 | RNF217     | 3.0   | 5.7   | 0.9 | 1.9 | 5.0E-05 |
| NM_007149    | ZNF184     | 1.7   | 3.2   | 0.9 | 1.9 | 5.0E-05 |
| NM_014925    | R3HDM2     | 4.4   | 8.4   | 0.9 | 1.9 | 5.0E-05 |
| NM_016500    | PBDC1      | 15.4  | 29.3  | 0.9 | 1.9 | 5.0E-05 |
| NM_001171993 | HPD        | 6.6   | 12.5  | 0.9 | 1.9 | 5.0E-05 |
| NM_133473    | ZNF431     | 5.8   | 10.9  | 0.9 | 1.9 | 5.0E-05 |
| NM_001141972 | DPH6       | 4.2   | 7.9   | 0.9 | 1.9 | 5.0E-05 |
| NM_001080791 | C15orf57   | 5.7   | 10.9  | 0.9 | 1.9 | 5.0E-05 |
| NR_034085    | LOC648987  | 4.3   | 8.2   | 0.9 | 1.9 | 9.0E-04 |
| NM_002228    | JUN        | 29.2  | 55.6  | 0.9 | 1.9 | 5.0E-05 |
| NM_005649    | ZNF354A    | 5.1   | 9.7   | 0.9 | 1.9 | 5.0E-05 |

|              |              |       |       |     |     |         |
|--------------|--------------|-------|-------|-----|-----|---------|
| NM_001127244 | LRRC8A       | 18.6  | 35.5  | 0.9 | 1.9 | 5.0E-05 |
| NM_012232    | PTRF         | 177.0 | 338.0 | 0.9 | 1.9 | 5.0E-05 |
| NM_133474    | ZNF721       | 5.3   | 10.1  | 0.9 | 1.9 | 5.0E-05 |
| NM_001013672 | C17orf97     | 1.6   | 3.1   | 0.9 | 1.9 | 5.0E-05 |
| NM_020243    | TOMM22       | 28.7  | 54.9  | 0.9 | 1.9 | 5.0E-05 |
| NM_031923    | TAF3         | 3.3   | 6.3   | 0.9 | 1.9 | 5.0E-05 |
| NM_001098831 | MORN4        | 1.9   | 3.6   | 0.9 | 1.9 | 5.0E-05 |
| NM_001130042 | CRYZ         | 29.6  | 56.6  | 0.9 | 1.9 | 5.0E-05 |
| NM_006955    | ZNF33B       | 3.2   | 6.1   | 0.9 | 1.9 | 4.5E-04 |
| NM_001030287 | ATF3         | 2.9   | 5.5   | 0.9 | 1.9 | 5.0E-05 |
| NM_001164232 | DDHD2        | 8.4   | 16.1  | 0.9 | 1.9 | 5.0E-05 |
| NM_001287349 | ZNF852       | 2.1   | 4.0   | 0.9 | 1.9 | 5.0E-05 |
| NM_001242797 | ZNF322       | 4.3   | 8.2   | 0.9 | 1.9 | 5.0E-05 |
| NM_032788    | ZNF514       | 2.6   | 4.9   | 0.9 | 1.9 | 5.0E-05 |
| NM_001190791 | ZNF317       | 6.2   | 12.0  | 0.9 | 1.9 | 5.0E-05 |
| NR_002211    | MEIS3P1      | 4.5   | 8.6   | 0.9 | 1.9 | 5.0E-05 |
| NM_001270436 | CDC42EP3     | 8.9   | 17.0  | 0.9 | 1.9 | 5.0E-05 |
| NM_003526    | HIST1H2BC    | 1.6   | 3.0   | 0.9 | 1.9 | 8.1E-03 |
| NM_001145204 | SHISA9       | 13.0  | 25.0  | 0.9 | 1.9 | 5.0E-05 |
| NR_034006    | LOC100132352 | 2.8   | 5.4   | 0.9 | 1.9 | 5.0E-05 |
| NM_001257158 | CEP41        | 2.2   | 4.2   | 0.9 | 1.9 | 5.0E-05 |
| NM_001143820 | ETS1         | 25.1  | 48.4  | 0.9 | 1.9 | 5.0E-05 |
| NM_000027    | AGA          | 3.9   | 7.5   | 0.9 | 1.9 | 5.0E-05 |
| NM_000692    | ALDH1B1      | 44.3  | 85.4  | 0.9 | 1.9 | 5.0E-05 |
| NM_002335    | LRP5         | 15.8  | 30.4  | 0.9 | 1.9 | 5.0E-05 |
| NM_014572    | LATS2        | 18.1  | 34.9  | 0.9 | 1.9 | 5.0E-05 |
| NM_001142401 | CD164        | 82.5  | 159.2 | 0.9 | 1.9 | 5.0E-05 |
| NM_001128833 | ZBTB4        | 10.8  | 20.8  | 0.9 | 1.9 | 5.0E-05 |
| NM_001037277 | GGPS1        | 6.0   | 11.6  | 1.0 | 1.9 | 5.0E-05 |
| NM_001166243 | FHIT         | 2.0   | 3.9   | 1.0 | 1.9 | 8.0E-03 |
| NM_001135999 | RUSC2        | 8.6   | 16.7  | 1.0 | 1.9 | 5.0E-05 |
| NM_015130    | TBC1D9       | 5.2   | 10.0  | 1.0 | 1.9 | 5.0E-05 |
| NM_001145008 | BTN3A1       | 4.0   | 7.8   | 1.0 | 1.9 | 1.5E-04 |
| NM_133459    | CCBE1        | 6.6   | 12.7  | 1.0 | 1.9 | 5.0E-05 |
| NM_022081    | HPS4         | 4.1   | 7.9   | 1.0 | 1.9 | 5.0E-05 |
| NM_001136265 | IFFO2        | 5.4   | 10.4  | 1.0 | 1.9 | 5.0E-05 |
| NM_001256550 | MPP5         | 10.2  | 19.9  | 1.0 | 1.9 | 5.0E-05 |
| NM_033208    | TIGD7        | 1.6   | 3.1   | 1.0 | 1.9 | 5.0E-05 |
| NM_138794    | LYPLAL1      | 4.1   | 8.0   | 1.0 | 1.9 | 5.0E-05 |
| NM_004090    | DUSP3        | 18.3  | 35.7  | 1.0 | 1.9 | 5.0E-05 |
| NM_006690    | MMP24        | 6.5   | 12.7  | 1.0 | 1.9 | 5.0E-05 |
| NM_015332    | NUDCD3       | 8.3   | 16.1  | 1.0 | 1.9 | 5.0E-05 |
| NR_038291    | LINC00707    | 10.3  | 20.1  | 1.0 | 1.9 | 5.0E-05 |
| NM_001198972 | KIAA1522     | 12.5  | 24.5  | 1.0 | 2.0 | 5.0E-05 |
| NM_001244710 | GFPT1        | 16.2  | 31.6  | 1.0 | 2.0 | 5.0E-05 |
| NM_005498    | AP1M2        | 4.9   | 9.6   | 1.0 | 2.0 | 5.0E-05 |
| NM_001080479 | ARHGEF28     | 6.2   | 12.1  | 1.0 | 2.0 | 5.0E-05 |
| NM_002583    | PAWR         | 33.4  | 65.3  | 1.0 | 2.0 | 5.0E-05 |
| NM_006948    | HSPA13       | 20.0  | 39.1  | 1.0 | 2.0 | 5.0E-05 |
| NM_014188    | SSU72        | 38.9  | 76.0  | 1.0 | 2.0 | 5.0E-05 |
| NM_001277403 | ZNF730       | 2.0   | 4.0   | 1.0 | 2.0 | 5.0E-05 |
| NM_002834    | PTPN11       | 26.2  | 51.4  | 1.0 | 2.0 | 5.0E-05 |
| NM_024613    | PLEKHF2      | 5.1   | 9.9   | 1.0 | 2.0 | 5.0E-05 |
| NM_001164766 | ZFH3         | 5.8   | 11.5  | 1.0 | 2.0 | 5.0E-05 |
| NR_103768    | LOC158960    | 1.7   | 3.3   | 1.0 | 2.0 | 5.0E-05 |
| NM_144638    | TMEM42       | 8.0   | 15.7  | 1.0 | 2.0 | 5.0E-05 |
| NM_001130706 | C14orf93     | 2.0   | 3.9   | 1.0 | 2.0 | 5.0E-05 |
| NM_001099638 | ZNF146       | 14.6  | 28.6  | 1.0 | 2.0 | 5.0E-05 |
| NM_152640    | DCP1B        | 2.8   | 5.5   | 1.0 | 2.0 | 5.0E-05 |
| NM_006544    | EXOC5        | 7.6   | 15.0  | 1.0 | 2.0 | 5.0E-05 |
| NM_006506    | RASA2        | 3.7   | 7.2   | 1.0 | 2.0 | 5.0E-05 |



|              |            |       |       |     |     |         |
|--------------|------------|-------|-------|-----|-----|---------|
| NM_000092    | COL4A4     | 2.6   | 5.1   | 1.0 | 2.0 | 5.0E-05 |
| NM_144684    | ZNF480     | 2.2   | 4.4   | 1.0 | 2.0 | 5.0E-05 |
| NM_000224    | KRT18      | 165.5 | 325.9 | 1.0 | 2.0 | 5.0E-05 |
| NM_001014764 | EMC6       | 20.7  | 40.8  | 1.0 | 2.0 | 8.0E-04 |
| NM_001032281 | TFPI       | 13.9  | 27.5  | 1.0 | 2.0 | 5.0E-05 |
| NM_001195053 | DDIT3      | 6.9   | 13.6  | 1.0 | 2.0 | 8.7E-03 |
| NM_001195811 | PLD5       | 8.9   | 17.5  | 1.0 | 2.0 | 5.0E-05 |
| NR_000029    | RPL23AP7   | 6.5   | 12.8  | 1.0 | 2.0 | 5.0E-05 |
| NM_000093    | COL5A1     | 36.5  | 72.1  | 1.0 | 2.0 | 5.0E-05 |
| NM_001199741 | GADD45A    | 35.5  | 70.2  | 1.0 | 2.0 | 5.0E-05 |
| NM_001282225 | CECR1      | 3.3   | 6.6   | 1.0 | 2.0 | 5.0E-05 |
| NM_003805    | CRADD      | 2.2   | 4.5   | 1.0 | 2.0 | 5.0E-05 |
| NM_005797    | MPZL2      | 5.3   | 10.4  | 1.0 | 2.0 | 5.0E-05 |
| NM_001242559 | MAP4K4     | 22.1  | 44.0  | 1.0 | 2.0 | 5.0E-05 |
| NM_001081492 | KRT80      | 8.5   | 16.9  | 1.0 | 2.0 | 5.0E-05 |
| NM_001166108 | PALLD      | 82.4  | 163.8 | 1.0 | 2.0 | 5.0E-05 |
| NM_001006945 | LRIF1      | 5.2   | 10.4  | 1.0 | 2.0 | 5.0E-05 |
| NM_002444    | MSN        | 129.4 | 257.3 | 1.0 | 2.0 | 5.0E-05 |
| NM_002608    | PDGFB      | 4.6   | 9.2   | 1.0 | 2.0 | 5.0E-05 |
| NM_003818    | CDS2       | 5.5   | 11.0  | 1.0 | 2.0 | 5.0E-05 |
| NM_001003794 | MGLL       | 9.1   | 18.0  | 1.0 | 2.0 | 5.0E-05 |
| NM_001005502 | CPM        | 21.8  | 43.5  | 1.0 | 2.0 | 5.0E-05 |
| NM_000410    | HFE        | 3.4   | 6.8   | 1.0 | 2.0 | 5.0E-05 |
| NM_001284498 | SLC43A2    | 8.5   | 17.1  | 1.0 | 2.0 | 5.0E-05 |
| NM_080652    | TMEM41A    | 6.5   | 13.1  | 1.0 | 2.0 | 5.0E-05 |
| NR_023921    | DHRS4-AS1  | 2.1   | 4.2   | 1.0 | 2.0 | 5.0E-05 |
| NM_015641    | TES        | 18.1  | 36.2  | 1.0 | 2.0 | 5.0E-05 |
| NM_001258320 | TP53I11    | 9.6   | 19.3  | 1.0 | 2.0 | 5.0E-05 |
| NM_024513    | FYCO1      | 3.5   | 7.0   | 1.0 | 2.0 | 5.0E-05 |
| NM_001286514 | ATF7IP     | 6.3   | 12.5  | 1.0 | 2.0 | 5.0E-05 |
| NM_001038603 | MARVELD2   | 1.7   | 3.4   | 1.0 | 2.0 | 5.0E-05 |
| NM_001177716 | KLF11      | 3.9   | 7.8   | 1.0 | 2.0 | 5.0E-05 |
| NM_004669    | CLIC3      | 26.1  | 52.5  | 1.0 | 2.0 | 5.0E-05 |
| NM_016206    | VGLL3      | 3.3   | 6.5   | 1.0 | 2.0 | 5.0E-05 |
| NM_001007253 | ERV3-1     | 2.5   | 5.0   | 1.0 | 2.0 | 5.0E-05 |
| NM_001284263 | CCDC117    | 8.9   | 17.9  | 1.0 | 2.0 | 5.0E-05 |
| NM_001112736 | FAM208A    | 6.7   | 13.5  | 1.0 | 2.0 | 5.0E-05 |
| NM_003427    | ZNF76      | 6.4   | 12.9  | 1.0 | 2.0 | 5.0E-05 |
| NR_038975    | MIR181A2HG | 1.5   | 3.0   | 1.0 | 2.0 | 6.0E-04 |
| NM_001100626 | ERLIN1     | 31.6  | 64.0  | 1.0 | 2.0 | 5.0E-05 |
| NM_001242864 | PRMT2      | 24.7  | 50.0  | 1.0 | 2.0 | 5.0E-05 |
| NM_001013620 | ALG10B     | 2.2   | 4.4   | 1.0 | 2.0 | 5.0E-05 |
| NM_002895    | RBL1       | 4.8   | 9.8   | 1.0 | 2.0 | 5.0E-05 |
| NR_015431    | FLJ43663   | 1.6   | 3.3   | 1.0 | 2.0 | 5.0E-05 |
| NM_020824    | ARHGAP21   | 7.8   | 15.9  | 1.0 | 2.0 | 5.0E-05 |
| NM_001003818 | TRIM6      | 4.7   | 9.7   | 1.0 | 2.0 | 5.0E-05 |
| NM_003440    | ZNF140     | 2.4   | 4.9   | 1.0 | 2.1 | 5.0E-05 |
| NM_001099455 | CPPED1     | 4.9   | 10.1  | 1.0 | 2.1 | 5.0E-05 |
| NM_001159377 | MTHFSD     | 4.7   | 9.7   | 1.0 | 2.1 | 5.0E-05 |
| NM_033512    | TSPYL5     | 4.4   | 9.0   | 1.0 | 2.1 | 5.0E-05 |
| NM_001135564 | HSF2       | 4.2   | 8.8   | 1.0 | 2.1 | 5.0E-05 |
| NM_001010911 | C10orf114  | 2.3   | 4.7   | 1.0 | 2.1 | 5.0E-05 |
| NM_001042481 | FRMD6      | 26.8  | 55.3  | 1.0 | 2.1 | 5.0E-05 |
| NM_001845    | COL4A1     | 334.7 | 689.8 | 1.0 | 2.1 | 5.0E-05 |
| NM_004746    | DLGAP1     | 1.7   | 3.6   | 1.0 | 2.1 | 5.0E-05 |
| NM_001254755 | CYB5D2     | 4.3   | 9.0   | 1.0 | 2.1 | 5.0E-04 |
| NM_001037125 | UNKL       | 7.6   | 15.7  | 1.0 | 2.1 | 5.0E-05 |
| NM_194318    | B3GALTL    | 5.6   | 11.5  | 1.0 | 2.1 | 5.0E-05 |
| NM_001170905 | ZNF736     | 2.8   | 5.9   | 1.0 | 2.1 | 5.0E-05 |
| NM_001042415 | ZNF596     | 1.6   | 3.4   | 1.0 | 2.1 | 5.0E-05 |
| NM_001171795 | TRIQK      | 3.2   | 6.7   | 1.0 | 2.1 | 5.0E-05 |

|              |              |       |       |     |     |         |
|--------------|--------------|-------|-------|-----|-----|---------|
| NR_046163    | MIRLET7DHG   | 1.6   | 3.4   | 1.1 | 2.1 | 5.0E-05 |
| NM_001100623 | PLEKHB2      | 23.9  | 49.6  | 1.1 | 2.1 | 5.0E-05 |
| NR_024582    | JPX          | 1.8   | 3.7   | 1.1 | 2.1 | 5.0E-05 |
| NM_020381    | PDSS2        | 2.9   | 6.1   | 1.1 | 2.1 | 5.0E-05 |
| NM_001270367 | TMEM254      | 6.3   | 13.2  | 1.1 | 2.1 | 5.0E-05 |
| NM_012425    | RSU1         | 30.3  | 63.2  | 1.1 | 2.1 | 5.0E-05 |
| NM_022787    | NMNAT1       | 2.4   | 4.9   | 1.1 | 2.1 | 5.0E-05 |
| NM_021633    | KLHL12       | 9.1   | 19.2  | 1.1 | 2.1 | 5.0E-05 |
| NM_003289    | TPM2         | 412.8 | 867.5 | 1.1 | 2.1 | 5.0E-05 |
| NM_001145418 | TTC28        | 3.8   | 8.0   | 1.1 | 2.1 | 5.0E-05 |
| NM_133458    | ZFP90        | 3.1   | 6.5   | 1.1 | 2.1 | 5.0E-05 |
| NM_001251977 | RCAN3        | 6.2   | 13.1  | 1.1 | 2.1 | 5.0E-05 |
| NM_003811    | TNFSF9       | 6.5   | 13.7  | 1.1 | 2.1 | 5.0E-05 |
| NM_001010853 | PM20D2       | 5.4   | 11.4  | 1.1 | 2.1 | 5.0E-05 |
| NM_021038    | MBNL1        | 15.1  | 31.8  | 1.1 | 2.1 | 5.0E-05 |
| NM_001821    | CHML         | 8.9   | 18.7  | 1.1 | 2.1 | 5.0E-05 |
| NM_003079    | SMARCE1      | 25.0  | 52.7  | 1.1 | 2.1 | 5.0E-05 |
| NM_001278599 | AXL          | 51.6  | 108.8 | 1.1 | 2.1 | 5.0E-05 |
| NM_001009555 | SH3D19       | 4.1   | 8.6   | 1.1 | 2.1 | 5.0E-05 |
| NM_001178106 | ZNF185       | 7.3   | 15.5  | 1.1 | 2.1 | 5.0E-05 |
| NM_001143819 | TPCN1        | 6.9   | 14.7  | 1.1 | 2.1 | 5.0E-05 |
| NM_001191322 | GREM1        | 43.2  | 91.4  | 1.1 | 2.1 | 5.0E-05 |
| NM_152455    | ZSCAN29      | 3.3   | 6.9   | 1.1 | 2.1 | 5.0E-05 |
| NM_001001549 | GRB10        | 5.2   | 10.9  | 1.1 | 2.1 | 5.0E-05 |
| NM_001160113 | C15orf40     | 6.8   | 14.5  | 1.1 | 2.1 | 5.0E-05 |
| NM_001042705 | IQCJ         | 9.4   | 20.0  | 1.1 | 2.1 | 5.0E-05 |
| NM_001160223 | RNF170       | 3.1   | 6.6   | 1.1 | 2.1 | 5.0E-05 |
| NM_145295    | ZNF627       | 4.1   | 8.8   | 1.1 | 2.1 | 5.0E-05 |
| NM_003401    | XRCC4        | 6.2   | 13.2  | 1.1 | 2.1 | 5.0E-05 |
| NM_001039547 | GK5          | 2.1   | 4.4   | 1.1 | 2.1 | 5.0E-05 |
| NM_001973    | ELK4         | 4.5   | 9.7   | 1.1 | 2.1 | 5.0E-05 |
| NM_000141    | FGFR2        | 4.8   | 10.3  | 1.1 | 2.1 | 5.0E-05 |
| NM_006997    | TACC2        | 6.8   | 14.5  | 1.1 | 2.1 | 5.0E-05 |
| NM_004486    | GOLGA2       | 10.6  | 22.8  | 1.1 | 2.1 | 5.0E-05 |
| NM_003307    | TRPM2        | 3.5   | 7.5   | 1.1 | 2.2 | 5.0E-05 |
| NM_000694    | ALDH3B1      | 5.0   | 10.8  | 1.1 | 2.2 | 5.0E-05 |
| NM_138389    | FAM114A1     | 13.2  | 28.4  | 1.1 | 2.2 | 5.0E-05 |
| NM_001277971 | SGK196       | 9.0   | 19.4  | 1.1 | 2.2 | 5.0E-05 |
| NR_003277    | HNRNPA1P33   | 20.6  | 44.4  | 1.1 | 2.2 | 5.0E-05 |
| NR_026757    | OIP5-AS1     | 16.5  | 35.6  | 1.1 | 2.2 | 5.0E-05 |
| NM_001256295 | ETS2         | 10.2  | 22.0  | 1.1 | 2.2 | 5.0E-05 |
| NM_001130916 | TGFBR1       | 54.0  | 116.5 | 1.1 | 2.2 | 5.0E-05 |
| NM_203462    | MRFAP1L1     | 16.0  | 34.6  | 1.1 | 2.2 | 5.0E-05 |
| NM_001195227 | TRPM4        | 6.3   | 13.6  | 1.1 | 2.2 | 5.0E-05 |
| NM_003309    | TSPYL1       | 15.3  | 33.1  | 1.1 | 2.2 | 5.0E-05 |
| NR_045525    | ZNF724P      | 2.1   | 4.5   | 1.1 | 2.2 | 5.0E-05 |
| NM_014330    | PPP1R15A     | 6.8   | 14.8  | 1.1 | 2.2 | 5.0E-05 |
| NM_001131028 | ATG10        | 3.3   | 7.2   | 1.1 | 2.2 | 5.0E-05 |
| NM_001271887 | SRGAP2D      | 6.9   | 15.0  | 1.1 | 2.2 | 5.0E-05 |
| NM_033204    | ZNF101       | 3.3   | 7.3   | 1.1 | 2.2 | 5.0E-05 |
| NM_001175    | ARHGDIB      | 11.4  | 24.8  | 1.1 | 2.2 | 5.0E-05 |
| NM_001127211 | KIAA1598     | 4.4   | 9.5   | 1.1 | 2.2 | 5.0E-05 |
| NM_001098520 | HTATIP2      | 16.1  | 35.2  | 1.1 | 2.2 | 5.0E-05 |
| NR_109781    | LOC100506985 | 1.7   | 3.6   | 1.1 | 2.2 | 2.4E-03 |
| NM_001039127 | ZNF718       | 7.4   | 16.1  | 1.1 | 2.2 | 5.0E-05 |
| NM_000903    | NQO1         | 59.7  | 130.7 | 1.1 | 2.2 | 5.0E-05 |
| NM_006406    | PRDX4        | 67.4  | 147.9 | 1.1 | 2.2 | 5.0E-05 |
| NM_007076    | FICD         | 2.6   | 5.8   | 1.1 | 2.2 | 5.0E-05 |
| NM_007187    | WBP4         | 3.7   | 8.2   | 1.1 | 2.2 | 5.0E-05 |
| NM_001144063 | OSBPL5       | 6.8   | 15.1  | 1.1 | 2.2 | 5.0E-05 |
| NM_033515    | ARHGAP18     | 4.4   | 9.6   | 1.1 | 2.2 | 5.0E-05 |

|              |               |       |       |     |     |         |
|--------------|---------------|-------|-------|-----|-----|---------|
| NM_001013746 | ZNF107        | 3.9   | 8.6   | 1.1 | 2.2 | 5.0E-05 |
| NM_001006114 | YBEY          | 3.5   | 7.9   | 1.1 | 2.2 | 4.0E-03 |
| NR_001447    | MT1L          | 31.4  | 69.6  | 1.1 | 2.2 | 5.0E-05 |
| NM_032842    | TMEM209       | 5.9   | 13.1  | 1.2 | 2.2 | 5.0E-05 |
| NM_001144074 | DET1          | 1.7   | 3.8   | 1.2 | 2.2 | 5.0E-05 |
| NM_001256648 | ZNF43         | 1.9   | 4.3   | 1.2 | 2.2 | 5.0E-05 |
| NM_001191    | BCL2L1        | 26.5  | 59.2  | 1.2 | 2.2 | 5.0E-05 |
| NM_001620    | AHNAK         | 123.4 | 276.2 | 1.2 | 2.2 | 5.0E-05 |
| NM_001010879 | ZIK1          | 1.9   | 4.3   | 1.2 | 2.2 | 5.0E-05 |
| NM_007173    | PRSS23        | 16.4  | 36.8  | 1.2 | 2.2 | 5.0E-05 |
| NR_047573    | TMEM44-AS1    | 1.5   | 3.4   | 1.2 | 2.2 | 8.5E-03 |
| NM_006851    | GLIPR1        | 22.9  | 51.5  | 1.2 | 2.2 | 5.0E-05 |
| NR_026981    | RPL23AP82     | 3.6   | 8.1   | 1.2 | 2.2 | 5.0E-05 |
| NM_018284    | GBP3          | 9.5   | 21.4  | 1.2 | 2.2 | 5.0E-05 |
| NM_018691    | FAM114A2      | 7.1   | 16.1  | 1.2 | 2.3 | 5.0E-05 |
| NM_017629    | AGO4          | 3.3   | 7.4   | 1.2 | 2.3 | 5.0E-05 |
| NM_002205    | ITGA5         | 121.6 | 273.9 | 1.2 | 2.3 | 5.0E-05 |
| NM_001310    | CREBL2        | 4.9   | 11.1  | 1.2 | 2.3 | 5.0E-05 |
| NM_001184740 | CTTN          | 54.9  | 124.0 | 1.2 | 2.3 | 5.0E-05 |
| NM_000142    | FGFR3         | 4.9   | 11.1  | 1.2 | 2.3 | 5.0E-05 |
| NM_001281736 | ENOX2         | 2.0   | 4.4   | 1.2 | 2.3 | 5.0E-05 |
| NM_138374    | ZNF845        | 3.0   | 6.8   | 1.2 | 2.3 | 5.0E-05 |
| NM_001785    | CDA           | 10.1  | 22.9  | 1.2 | 2.3 | 5.0E-05 |
| NM_080750    | DPH3P1        | 2.3   | 5.2   | 1.2 | 2.3 | 5.0E-05 |
| NM_174908    | CCDC50        | 9.6   | 22.0  | 1.2 | 2.3 | 5.0E-05 |
| NM_001130455 | DYSF          | 7.6   | 17.4  | 1.2 | 2.3 | 5.0E-05 |
| NM_032415    | CARD11        | 2.6   | 6.0   | 1.2 | 2.3 | 5.0E-05 |
| NM_001282663 | MICAL2        | 24.3  | 55.4  | 1.2 | 2.3 | 5.0E-05 |
| NM_130468    | CHST14        | 8.1   | 18.5  | 1.2 | 2.3 | 5.0E-05 |
| NR_038269    | LOC100506844  | 7.2   | 16.5  | 1.2 | 2.3 | 5.0E-05 |
| NM_001992    | F2R           | 11.4  | 26.2  | 1.2 | 2.3 | 5.0E-05 |
| NM_001247997 | CLIP1         | 10.3  | 23.7  | 1.2 | 2.3 | 5.0E-05 |
| NM_001001683 | MED11         | 4.8   | 11.1  | 1.2 | 2.3 | 5.0E-05 |
| NM_003435    | ZNF134        | 3.6   | 8.4   | 1.2 | 2.3 | 5.0E-05 |
| NM_017868    | TTC12         | 3.8   | 8.7   | 1.2 | 2.3 | 5.0E-05 |
| NM_001206729 | AKT3          | 9.6   | 22.2  | 1.2 | 2.3 | 5.0E-05 |
| NM_002256    | KISS1         | 3.1   | 7.1   | 1.2 | 2.3 | 5.0E-05 |
| NM_022909    | CENPH         | 21.5  | 49.9  | 1.2 | 2.3 | 5.0E-05 |
| NM_001260491 | SLC9A8        | 2.0   | 4.7   | 1.2 | 2.3 | 5.0E-05 |
| NM_015299    | KHNYN         | 5.4   | 12.5  | 1.2 | 2.3 | 5.0E-05 |
| NM_001135599 | TGFB2         | 12.3  | 28.7  | 1.2 | 2.3 | 5.0E-05 |
| NM_032423    | ZNF528        | 1.5   | 3.4   | 1.2 | 2.3 | 5.0E-05 |
| NM_005502    | ABCA1         | 4.2   | 9.8   | 1.2 | 2.3 | 5.0E-05 |
| NM_021148    | ZNF273        | 1.5   | 3.6   | 1.2 | 2.3 | 5.0E-05 |
| NM_019002    | ETAA1         | 4.2   | 9.9   | 1.2 | 2.3 | 5.0E-05 |
| NM_015227    | POFUT2        | 15.5  | 36.2  | 1.2 | 2.3 | 5.0E-05 |
| NM_001178102 | LOX           | 53.4  | 125.1 | 1.2 | 2.3 | 5.0E-05 |
| NM_001172650 | ZNF559-ZNF177 | 2.4   | 5.7   | 1.2 | 2.3 | 5.0E-05 |
| NM_001190826 | FAM217B       | 2.6   | 6.1   | 1.2 | 2.3 | 5.0E-05 |
| NM_015689    | DENND2A       | 1.7   | 3.9   | 1.2 | 2.3 | 5.0E-05 |
| NM_014742    | TM9SF4        | 14.2  | 33.4  | 1.2 | 2.3 | 5.0E-05 |
| NM_016205    | PDGFC         | 12.4  | 29.1  | 1.2 | 2.4 | 5.0E-05 |
| NM_001113411 | FGGY          | 2.7   | 6.3   | 1.2 | 2.4 | 5.0E-05 |
| NR_015360    | FLJ33630      | 5.9   | 13.9  | 1.2 | 2.4 | 2.0E-04 |
| NM_001010851 | ZNF766        | 2.7   | 6.4   | 1.2 | 2.4 | 5.0E-05 |
| NM_001270938 | ZNF551        | 1.6   | 3.8   | 1.2 | 2.4 | 5.0E-05 |
| NM_001130022 | ZNF680        | 3.4   | 8.1   | 1.2 | 2.4 | 5.0E-05 |
| NM_004724    | ZW10          | 6.2   | 14.7  | 1.2 | 2.4 | 5.0E-05 |
| NR_040091    | LOC100506990  | 3.5   | 8.4   | 1.2 | 2.4 | 5.0E-05 |
| NM_145243    | OMA1          | 1.9   | 4.4   | 1.2 | 2.4 | 5.0E-05 |
| NM_030777    | SLC2A10       | 3.0   | 7.0   | 1.2 | 2.4 | 5.0E-05 |

|              |              |       |       |     |     |         |
|--------------|--------------|-------|-------|-----|-----|---------|
| NM_001174118 | MEX3D        | 11.8  | 28.0  | 1.2 | 2.4 | 5.0E-05 |
| NM_004839    | HOMER2       | 17.8  | 42.3  | 1.3 | 2.4 | 5.0E-05 |
| NM_016078    | TVP23B       | 12.5  | 29.9  | 1.3 | 2.4 | 5.0E-05 |
| NM_018328    | MBD5         | 1.5   | 3.5   | 1.3 | 2.4 | 5.0E-05 |
| NR_003127    | ZNF542       | 1.9   | 4.6   | 1.3 | 2.4 | 5.0E-05 |
| NM_152550    | SH3RF2       | 3.3   | 8.0   | 1.3 | 2.4 | 5.0E-05 |
| NM_005159    | ACTC1        | 1.7   | 4.0   | 1.3 | 2.4 | 5.0E-05 |
| NM_033089    | ZCCHC3       | 6.0   | 14.4  | 1.3 | 2.4 | 5.0E-05 |
| NM_001270362 | RAD23A       | 18.7  | 45.0  | 1.3 | 2.4 | 5.0E-05 |
| NM_001124    | ADM          | 7.3   | 17.5  | 1.3 | 2.4 | 5.0E-05 |
| NM_024830    | LPCAT1       | 30.4  | 73.1  | 1.3 | 2.4 | 5.0E-05 |
| NR_110032    | LOC101927045 | 1.6   | 3.8   | 1.3 | 2.4 | 5.0E-05 |
| NM_018137    | PRMT6        | 5.9   | 14.1  | 1.3 | 2.4 | 5.0E-05 |
| NM_000089    | COL1A2       | 12.8  | 30.9  | 1.3 | 2.4 | 5.0E-05 |
| NM_004273    | CHST3        | 12.6  | 30.4  | 1.3 | 2.4 | 5.0E-05 |
| NM_001142502 | PPP1R13L     | 16.0  | 38.6  | 1.3 | 2.4 | 5.0E-05 |
| NM_001040185 | ZNF765       | 1.8   | 4.5   | 1.3 | 2.4 | 5.0E-05 |
| NM_030648    | SETD7        | 3.7   | 9.1   | 1.3 | 2.4 | 5.0E-05 |
| NM_014584    | ERO1L        | 16.4  | 39.8  | 1.3 | 2.4 | 5.0E-05 |
| NR_024565    | ZNF271       | 2.8   | 6.9   | 1.3 | 2.4 | 5.0E-05 |
| NR_024430    | MIR100HG     | 4.7   | 11.3  | 1.3 | 2.4 | 5.0E-05 |
| NM_001195610 | DCDC2        | 2.1   | 5.1   | 1.3 | 2.4 | 5.0E-05 |
| NM_000332    | ATXN1        | 2.7   | 6.6   | 1.3 | 2.4 | 5.0E-05 |
| NM_001243254 | DENND5A      | 15.6  | 38.0  | 1.3 | 2.4 | 5.0E-05 |
| NM_003110    | SP2          | 1.6   | 3.8   | 1.3 | 2.4 | 6.0E-04 |
| NM_006097    | MYL9         | 322.6 | 790.1 | 1.3 | 2.4 | 5.0E-05 |
| NM_018956    | C9orf9       | 3.4   | 8.3   | 1.3 | 2.5 | 5.0E-05 |
| NM_001850    | COL8A1       | 49.4  | 121.1 | 1.3 | 2.5 | 5.0E-05 |
| NM_001031719 | DHRS12       | 1.6   | 3.9   | 1.3 | 2.5 | 5.0E-05 |
| NM_002999    | SDC4         | 44.1  | 108.5 | 1.3 | 2.5 | 5.0E-05 |
| NM_000908    | NPR3         | 5.0   | 12.4  | 1.3 | 2.5 | 5.0E-05 |
| NR_034170    | EIF3J-AS1    | 1.9   | 4.7   | 1.3 | 2.5 | 5.0E-05 |
| NM_001083592 | ROR1         | 3.9   | 9.7   | 1.3 | 2.5 | 5.0E-05 |
| NR_036511    | LOC100129917 | 2.2   | 5.4   | 1.3 | 2.5 | 9.5E-04 |
| NM_144618    | GABPB2       | 2.2   | 5.5   | 1.3 | 2.5 | 5.0E-05 |
| NM_014872    | ZBTB5        | 3.3   | 8.2   | 1.3 | 2.5 | 5.0E-05 |
| NR_038429    | LOC100506054 | 2.2   | 5.4   | 1.3 | 2.5 | 5.0E-05 |
| NM_000024    | ADRB2        | 2.0   | 5.1   | 1.3 | 2.5 | 5.0E-05 |
| NM_005471    | GNPDA1       | 21.6  | 53.9  | 1.3 | 2.5 | 5.0E-05 |
| NM_138689    | PPP1R14B     | 61.8  | 154.1 | 1.3 | 2.5 | 5.0E-05 |
| NM_001164407 | TLCD2        | 2.3   | 5.7   | 1.3 | 2.5 | 5.0E-05 |
| NM_000043    | FAS          | 6.2   | 15.6  | 1.3 | 2.5 | 5.0E-05 |
| NR_023392    | ZNF252P      | 1.5   | 3.9   | 1.3 | 2.5 | 5.0E-05 |
| NM_001001557 | GDF6         | 16.6  | 41.6  | 1.3 | 2.5 | 5.0E-05 |
| NM_001271003 | TFPI2        | 27.2  | 68.0  | 1.3 | 2.5 | 5.0E-05 |
| NM_001289166 | ZNF227       | 2.0   | 4.9   | 1.3 | 2.5 | 5.0E-05 |
| NR_002312    | RPPH1        | 8.4   | 21.3  | 1.3 | 2.5 | 5.0E-05 |
| NM_001284282 | VOPP1        | 26.6  | 67.3  | 1.3 | 2.5 | 5.0E-05 |
| NM_001244606 | IMMP2L       | 3.8   | 9.6   | 1.3 | 2.5 | 5.0E-05 |
| NM_001278661 | ZNF254       | 3.8   | 9.7   | 1.3 | 2.5 | 5.0E-05 |
| NM_001202554 | PIGV         | 2.5   | 6.3   | 1.3 | 2.5 | 5.0E-05 |
| NM_006969    | ZNF28        | 2.7   | 6.8   | 1.3 | 2.5 | 5.0E-05 |
| NM_001242359 | RHOBTB1      | 3.0   | 7.5   | 1.3 | 2.5 | 5.0E-05 |
| NR_037897    | SAP30L-AS1   | 1.8   | 4.6   | 1.3 | 2.5 | 4.3E-03 |
| NM_001204300 | ARHGAP19     | 4.0   | 10.2  | 1.4 | 2.6 | 5.0E-05 |
| NM_004805    | POLR2D       | 12.4  | 31.8  | 1.4 | 2.6 | 5.0E-05 |
| NM_001165881 | ZNF268       | 2.8   | 7.3   | 1.4 | 2.6 | 5.0E-05 |
| NM_003430    | ZNF91        | 1.9   | 4.9   | 1.4 | 2.6 | 5.0E-05 |
| NM_153367    | ZCCHC24      | 2.7   | 7.1   | 1.4 | 2.6 | 5.0E-05 |
| NM_017905    | TMCO3        | 17.9  | 46.6  | 1.4 | 2.6 | 5.0E-05 |
| NM_153695    | ZNF367       | 6.5   | 16.9  | 1.4 | 2.6 | 5.0E-05 |

|              |           |       |        |     |     |         |
|--------------|-----------|-------|--------|-----|-----|---------|
| NM_012297    | G3BP2     | 31.8  | 83.7   | 1.4 | 2.6 | 5.0E-05 |
| NM_000916    | OXTR      | 1.8   | 4.8    | 1.4 | 2.6 | 5.0E-05 |
| NM_001134381 | TBC1D5    | 6.7   | 17.7   | 1.4 | 2.6 | 5.0E-05 |
| NM_024106    | ZNF426    | 1.9   | 5.1    | 1.4 | 2.7 | 5.0E-05 |
| NM_001085    | SERPINA3  | 3.4   | 9.1    | 1.4 | 2.7 | 5.0E-05 |
| NM_001136108 | R3HCC1    | 9.0   | 23.9   | 1.4 | 2.7 | 1.8E-02 |
| NM_001160124 | KLF6      | 25.1  | 67.1   | 1.4 | 2.7 | 5.0E-05 |
| NM_001033083 | PBLD      | 3.0   | 8.1    | 1.4 | 2.7 | 6.0E-04 |
| NM_005037    | PPARG     | 3.5   | 9.4    | 1.4 | 2.7 | 5.0E-05 |
| NM_001099650 | GXYLT1    | 7.4   | 20.0   | 1.4 | 2.7 | 5.0E-05 |
| NM_199341    | C19orf68  | 2.6   | 6.9    | 1.4 | 2.7 | 5.0E-05 |
| NM_001042483 | NUPR1     | 12.7  | 34.4   | 1.4 | 2.7 | 5.0E-05 |
| NM_016546    | C1RL      | 3.3   | 8.9    | 1.4 | 2.7 | 5.0E-05 |
| NM_001008801 | ZNF468    | 2.1   | 5.7    | 1.4 | 2.7 | 5.0E-05 |
| NM_001042403 | USP44     | 4.6   | 12.4   | 1.4 | 2.7 | 5.0E-05 |
| NM_001657    | AREG      | 3.7   | 10.1   | 1.5 | 2.7 | 5.0E-05 |
| NM_001134445 | DDAH1     | 19.7  | 54.0   | 1.5 | 2.7 | 5.0E-05 |
| NM_007346    | OGFR      | 7.2   | 19.8   | 1.5 | 2.7 | 5.0E-05 |
| NM_001178096 | F3        | 23.5  | 64.8   | 1.5 | 2.8 | 5.0E-05 |
| NM_005603    | ATP8B1    | 2.6   | 7.2    | 1.5 | 2.8 | 5.0E-05 |
| NM_213606    | SLC16A12  | 1.6   | 4.6    | 1.5 | 2.8 | 5.0E-05 |
| NM_000782    | CYP24A1   | 3.0   | 8.3    | 1.5 | 2.8 | 5.0E-05 |
| NM_000700    | ANXA1     | 73.5  | 204.3  | 1.5 | 2.8 | 5.0E-05 |
| NM_001177701 | IFT27     | 5.2   | 14.6   | 1.5 | 2.8 | 5.0E-05 |
| NM_145039    | CENPBD1   | 1.7   | 4.7    | 1.5 | 2.8 | 5.0E-05 |
| NM_001136257 | SGMS2     | 5.6   | 15.8   | 1.5 | 2.8 | 5.0E-05 |
| NM_138432    | SDSL      | 8.6   | 24.7   | 1.5 | 2.9 | 5.0E-05 |
| NM_001257180 | SLC20A2   | 8.0   | 23.0   | 1.5 | 2.9 | 5.0E-05 |
| NM_001003800 | BICD2     | 5.8   | 16.8   | 1.5 | 2.9 | 5.0E-05 |
| NR_040245    | LINC00941 | 1.9   | 5.6    | 1.5 | 2.9 | 5.0E-05 |
| NM_024576    | OGFRL1    | 17.0  | 49.5   | 1.5 | 2.9 | 5.0E-05 |
| NM_001159    | AOX1      | 2.0   | 5.9    | 1.5 | 2.9 | 5.0E-05 |
| NM_015459    | ATL3      | 19.0  | 55.5   | 1.5 | 2.9 | 5.0E-05 |
| NM_001278192 | GANAB     | 84.3  | 246.4  | 1.5 | 2.9 | 5.0E-05 |
| NM_032283    | ZDHHC18   | 7.1   | 20.8   | 1.6 | 2.9 | 5.0E-05 |
| NM_001201546 | SLC16A4   | 3.5   | 10.2   | 1.6 | 2.9 | 5.0E-05 |
| NM_000527    | LDLR      | 13.2  | 39.0   | 1.6 | 2.9 | 5.0E-05 |
| NM_001018109 | PIR       | 2.9   | 8.4    | 1.6 | 3.0 | 5.0E-05 |
| NM_015154    | MESDC2    | 24.7  | 73.1   | 1.6 | 3.0 | 5.0E-05 |
| NM_001172895 | CAV1      | 62.0  | 185.1  | 1.6 | 3.0 | 5.0E-05 |
| NM_014945    | ABLIM3    | 7.1   | 21.4   | 1.6 | 3.0 | 5.0E-05 |
| NM_001077349 | ZNF682    | 2.5   | 7.4    | 1.6 | 3.0 | 5.0E-05 |
| NM_004436    | ENSA      | 44.8  | 134.8  | 1.6 | 3.0 | 5.0E-05 |
| NR_015381    | TP53TG1   | 2.4   | 7.2    | 1.6 | 3.0 | 5.0E-05 |
| NM_000602    | SERPINE1  | 582.2 | 1776.9 | 1.6 | 3.1 | 5.0E-05 |
| NR_023918    | LINC00339 | 3.5   | 10.7   | 1.6 | 3.1 | 5.0E-05 |
| NM_001145425 | NR1D2     | 4.1   | 12.6   | 1.6 | 3.1 | 5.0E-05 |
| NM_001001522 | TAGLN     | 608.4 | 1902.9 | 1.6 | 3.1 | 5.0E-05 |
| NM_020814    | MARCH4    | 3.5   | 11.0   | 1.6 | 3.1 | 5.0E-05 |
| NR_036496    | LOC339803 | 2.1   | 6.8    | 1.7 | 3.2 | 5.0E-05 |
| NM_005542    | INSIG1    | 15.1  | 47.9   | 1.7 | 3.2 | 5.0E-05 |
| NM_014282    | HABP4     | 5.5   | 17.3   | 1.7 | 3.2 | 5.0E-05 |
| NM_001012426 | FOXP4     | 4.8   | 15.3   | 1.7 | 3.2 | 5.0E-05 |
| NM_001135919 | SLC46A3   | 9.0   | 28.9   | 1.7 | 3.2 | 5.0E-05 |
| NM_006612    | KIF1C     | 12.5  | 40.2   | 1.7 | 3.2 | 5.0E-05 |
| NM_000933    | PLCB4     | 14.7  | 48.2   | 1.7 | 3.2 | 5.0E-05 |
| NM_001142964 | C22orf46  | 2.3   | 7.5    | 1.7 | 3.3 | 5.0E-05 |
| NM_001227    | CASP7     | 9.0   | 29.7   | 1.7 | 3.3 | 5.0E-05 |
| NM_001554    | CYR61     | 155.8 | 512.4  | 1.7 | 3.3 | 5.0E-05 |
| NM_177424    | STX12     | 7.5   | 24.9   | 1.7 | 3.3 | 5.0E-05 |
| NM_001145056 | SLC44A2   | 55.3  | 183.0  | 1.7 | 3.3 | 5.0E-05 |

|              |              |       |       |     |     |         |
|--------------|--------------|-------|-------|-----|-----|---------|
| NM_001136037 | LIMS2        | 7.1   | 23.7  | 1.7 | 3.3 | 5.0E-05 |
| NM_001003790 | ERLIN2       | 12.2  | 41.2  | 1.8 | 3.4 | 5.0E-05 |
| NM_001901    | CTGF         | 80.3  | 275.7 | 1.8 | 3.4 | 5.0E-05 |
| NR_038903    | LOC100506233 | 3.9   | 13.6  | 1.8 | 3.5 | 5.0E-05 |
| NR_024322    | MSL3P1       | 1.8   | 6.3   | 1.8 | 3.5 | 5.0E-05 |
| NM_001160183 | ZNF138       | 3.0   | 10.4  | 1.8 | 3.5 | 5.0E-05 |
| NM_001145646 | APH1B        | 2.0   | 7.1   | 1.8 | 3.5 | 5.0E-05 |
| NM_005139    | ANXA3        | 14.7  | 51.7  | 1.8 | 3.5 | 5.0E-05 |
| NM_019054    | FAM35A       | 5.2   | 18.7  | 1.8 | 3.6 | 5.0E-05 |
| NM_002192    | INHBA        | 10.2  | 37.2  | 1.9 | 3.6 | 5.0E-05 |
| NM_001141945 | ACTA2        | 13.6  | 49.7  | 1.9 | 3.6 | 5.0E-05 |
| NM_033520    | C19orf33     | 7.7   | 28.7  | 1.9 | 3.7 | 5.0E-05 |
| NM_000800    | FGF1         | 1.5   | 5.6   | 1.9 | 3.8 | 5.0E-05 |
| NM_001199893 | ACTG2        | 2.0   | 7.7   | 1.9 | 3.9 | 5.0E-05 |
| NM_199511    | CCDC80       | 36.0  | 139.4 | 2.0 | 3.9 | 5.0E-05 |
| NR_027082    | SFTA1P       | 1.7   | 6.7   | 2.0 | 3.9 | 5.0E-05 |
| NM_001167671 | LPP          | 12.3  | 47.8  | 2.0 | 3.9 | 5.0E-05 |
| NM_002298    | LCP1         | 2.0   | 7.9   | 2.0 | 4.0 | 5.0E-05 |
| NM_001168319 | EDN1         | 14.8  | 63.0  | 2.1 | 4.3 | 5.0E-05 |
| NM_001299    | CNN1         | 21.7  | 95.0  | 2.1 | 4.4 | 5.0E-05 |
| NM_001172309 | NEXN         | 4.2   | 18.4  | 2.1 | 4.4 | 5.0E-05 |
| NM_001145160 | TPM4         | 113.5 | 503.2 | 2.1 | 4.4 | 5.0E-05 |
| NM_001287135 | CDK14        | 2.5   | 11.4  | 2.2 | 4.6 | 5.0E-05 |
| NM_001126337 | TUFT1        | 8.7   | 40.3  | 2.2 | 4.6 | 5.0E-05 |
| NM_001031679 | MSRB3        | 4.5   | 21.6  | 2.3 | 4.8 | 5.0E-05 |
| NM_014391    | ANKRD1       | 17.0  | 84.6  | 2.3 | 5.0 | 5.0E-05 |
| NM_000104    | CYP1B1       | 1.6   | 7.9   | 2.3 | 5.1 | 5.0E-05 |
| NM_001009814 | VWA8         | 3.8   | 25.6  | 2.7 | 6.7 | 5.0E-05 |
| NM_002521    | NPPB         | 7.5   | 51.0  | 2.8 | 6.8 | 5.0E-05 |
| NM_000361    | THBD         | 2.3   | 16.2  | 2.8 | 7.1 | 5.0E-05 |
| NR_038861    | LINC00617    | 2.3   | 16.5  | 2.9 | 7.3 | 5.0E-05 |
